# Supplementary material for: An Accurate Approach for Computational pKa Determination of Phenolic Compounds
Source: MDPI journal article supplement (doi:10.3390/molecules27238590), 2022-12-06
Supplement: s1 [file s1]

## Supporting Information

# An Accurate Approach for Computational pKa Determination of Phenolic Compounds

Silvia Pezzola , Samuele Tarallo , Alessandro Iannini , Mariano Venanzi , Pierluca Galloni , Valeria Conte and Federica Sabuzi \*

Department of Chemical Science and Technologies, University of Rome Tor Vergata

## Contents

|                                                                  |      |
|------------------------------------------------------------------|------|
| Synthetic procedures                                             | S2   |
| Synthesis of 4-bromo-2-isopropyl-5-methylphenol (4-bromothymol). | S2   |
| Synthesis of 2-isopropyl-5-methyl-4-nitrophenol (4-nitrothymol). | S2   |
| Experimental pKa determination                                   | S3   |
| Optimized cartesian coordinates (in Angstroms)                   | S4   |
| References                                                       | S170 |

## Synthetic procedures

*Synthesis of 4-bromo-2-isopropyl-5-methylphenol (4-bromothymol).* 4-bromothymol was synthesized according to a previously reported literature procedure [1,2]. Thymol (7.5 g, 50 mmol), and KBr (6.0 g, 50 mmol) were dissolved in 85 mL of a 25 mM aqueous solution of  $\text{NH}_4\text{VO}_3$  (294 mg, 2.5 mmol). 10 mL of 10.4 mM aqueous solution of  $\text{H}_2\text{O}_2$  (100 mmol) and 4 mL of  $\text{HClO}_4$  11.7 M were added, to obtain pH = 1. The mixture was stirred at room temperature for 24 h. Afterwards, reaction products were extracted with three portions of ethyl acetate; the organic phase was dried over anhydrous  $\text{Na}_2\text{SO}_4$  and the solvent was evaporated. The product was crystallized by pentane[patent] and isolated as a white powder. Yield: 62%. MS (EI, 70 eV):  $m/z$  = 230 [ $\text{M}^{\text{Br}81}$ ] $^{+}$ ; 228 [ $\text{M}^{\text{Br}79}$ ] $^{+}$ ; 215 [ $\text{M}^{\text{Br}81}\text{-CH}_3$ ] $^{+}$ ; 213 [ $\text{M}^{\text{Br}79}\text{-CH}_3$ ] $^{+}$ ; 134 [ $\text{M-CH}_3\text{Br}$ ] $^{+}$ .  $^1\text{H-NMR}$  (400 MHz,  $\text{CDCl}_3$ ):  $\delta$  = 7.29 (s, 1 H), 6.64 (s, 1 H), 3.18–3.07 (m, 1 H,  $J$  = 6.9 Hz), 2.30 (s, 3 H), 1.23 (d, 6 H,  $J$  = 6.9 Hz) ppm.

*Synthesis of 2-isopropyl-5-methyl-4-nitrophenol (4-nitrothymol).* 4-nitrothymol was synthesized readjusting a previously reported literature procedure [3]. Thymol (1.5 g, 10 mmol) was dissolved in 25 mL of  $\text{CH}_2\text{Cl}_2$ . Afterwards, 2.3 mL of  $\text{H}_2\text{O}$ , 280 mg of tetrabutylammonium chloride (1 mmol) and 0.7 mL of  $\text{HNO}_3$  65 % (10 mmol, 1 eq., 15% solution) were added and the mixture was stirred at room temperature for 30 mins. Organic phase was then separated from the aqueous phase and washed with water until neutrality. The organic phase was dried over anhydrous  $\text{Na}_2\text{SO}_4$  and the solvent was evaporated. The product was purified by chromatography column ( $\text{SiO}_2$ , ethyl acetate : petroleum ether 1 : 9 v :v), crystallized by pentane and isolated as a pale yellow solid. Yield: 19 %. MS (EI, 70 eV):  $m/z$  = 195 [ $\text{M}$ ] $^{+}$ ; 180 [ $\text{M-CH}_3$ ] $^{+}$ ; 134 [ $\text{M-CH}_3\text{NO}_2$ ] $^{+}$ .  $^1\text{H-NMR}$  (400 MHz,  $\text{CDCl}_3$ ):  $\delta$  = 8.06 (s, 1 H), 6.76 (s, 1 H), 3.22–3.32 (m, 1 H,  $J$  = 7.1 Hz), 2.62 (s, 3 H), 1.32 (d, 6 H,  $J$  = 6.8 Hz) ppm.

## Experimental pKa determination

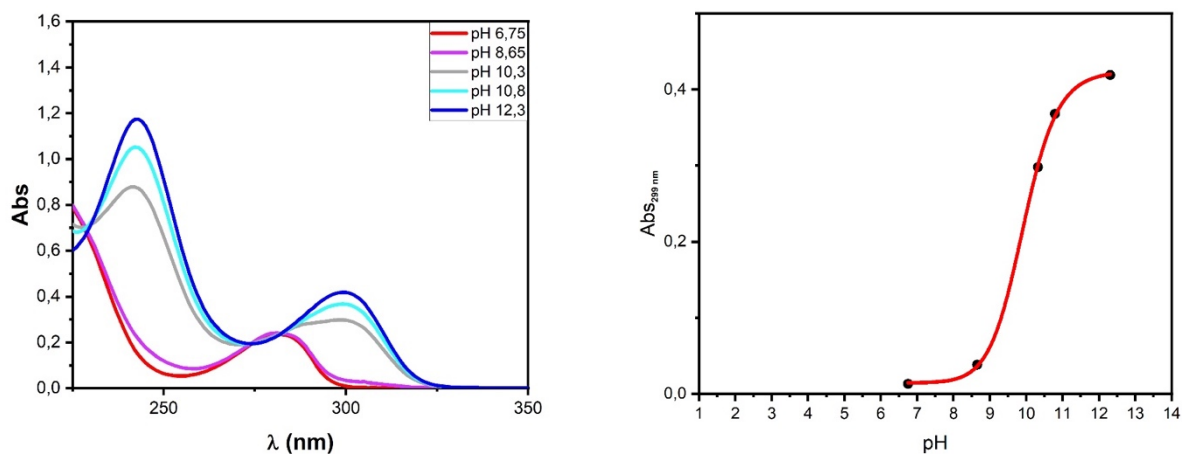

Figure. S1. UV-vis absorption spectra of 4-bromothymol at different pHs (left); sigmoidal fitting for 4-bromothymol pKa determination (right).  $pK_{a_{exp}} = 9.92 \pm 0.04$

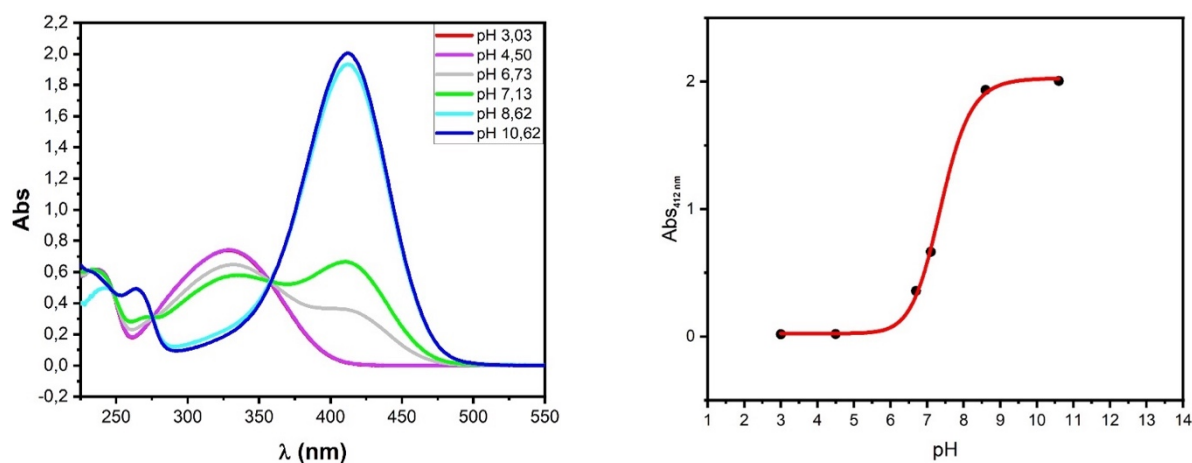

Figure. S2. UV-vis absorption spectra of 4-nitrothymol at different pHs (left); sigmoidal fitting for 4-nitrothymol pKa determination (right).  $pK_{a_{exp}} = 7.38 \pm 0.06$ .

## Optimized cartesian coordinates (in Angstroms)

### - B3LYP 6-311G+dp/SMD

#### H<sub>2</sub>O

Electronic Energy -76.471996

Stoichiometry H<sub>2</sub>O

Framework group CS[SG(H<sub>2</sub>O)]

Deg. of freedom 3

Full point group CS NOp 2

Largest Abelian subgroup CS NOp 2

Largest concise Abelian subgroup C1 NOp 1

Standard orientation:

| Center<br>Number | Atomic<br>Number | Atomic<br>Type | Coordinates (Angstroms) |           |          |
|------------------|------------------|----------------|-------------------------|-----------|----------|
|                  |                  |                | X                       | Y         | Z        |
| 1                | 8                | 0              | 0.000000                | 0.118386  | 0.000000 |
| 2                | 1                | 0              | 0.762387                | -0.473545 | 0.000000 |
| 3                | 1                | 0              | -0.762387               | -0.473545 | 0.000000 |

Rotational constants (GHZ): 805.7582180 431.3711005 280.9575394

#### OH<sup>-</sup>

Electronic Energy -75.978626

Stoichiometry HO(1-)

Framework group C\*[C\*(HO)]

Deg. of freedom 1

Full point group C\*V NOp 4

Largest Abelian subgroup C2V NOp 4

Largest concise Abelian subgroup C1 NOp 1

Standard orientation:

| Center<br>Number | Atomic<br>Number | Atomic<br>Type | Coordinates (Angstroms) |          |           |
|------------------|------------------|----------------|-------------------------|----------|-----------|
|                  |                  |                | X                       | Y        | Z         |
| 1                | 8                | 0              | 0.000000                | 0.000000 | 0.106682  |
| 2                | 1                | 0              | 0.000000                | 0.000000 | -0.853456 |

Rotational constants (GHZ): 0.0000000 578.2316725 578.2316725

#### Phenol

Electronic Energy -307.568264

Stoichiometry C<sub>6</sub>H<sub>6</sub>O

Framework group C1[X(C<sub>6</sub>H<sub>6</sub>O)]

Deg. of freedom 33

Full point group C1 NOp 1

Largest Abelian subgroup C1 NOp 1

Largest concise Abelian subgroup C1 NOp 1

Standard orientation:

| Center<br>Number | Atomic<br>Number | Atomic<br>Type | Coordinates (Angstroms) |           |           |
|------------------|------------------|----------------|-------------------------|-----------|-----------|
|                  |                  |                | X                       | Y         | Z         |
| 1                | 6                | 0              | 1.179045                | -1.186678 | 0.000140  |
| 2                | 6                | 0              | -0.213063               | -1.224759 | 0.000066  |
| 3                | 6                | 0              | -0.936320               | -0.028699 | -0.000050 |
| 4                | 6                | 0              | -0.269423               | 1.197857  | -0.000094 |
| 5                | 6                | 0              | 1.125581                | 1.222247  | -0.000019 |
| 6                | 6                | 0              | 1.857417                | 0.034302  | 0.000098  |
| 7                | 1                | 0              | 1.735819                | -2.117310 | 0.000232  |
| 8                | 1                | 0              | -0.748305               | -2.167526 | 0.000099  |
| 9                | 1                | 0              | -0.840118               | 2.121137  | -0.000184 |
| 10               | 1                | 0              | 1.637968                | 2.177827  | -0.000053 |
| 11               | 1                | 0              | 2.940851                | 0.057964  | 0.000156  |
| 12               | 8                | 0              | -2.310733               | -0.115848 | -0.000112 |
| 13               | 1                | 0              | -2.699761               | 0.769071  | -0.000203 |

Rotational constants (GHZ): 5.6531192 2.6090086 1.7851378

**Phenolate**

Electronic Energy -307.093078

Stoichiometry C<sub>6</sub>H<sub>5</sub>O(1-)Framework group C1[X(C<sub>6</sub>H<sub>5</sub>O)]

Deg. of freedom 30

Full point group C1 NOp 1

Largest Abelian subgroup C1 NOp 1

Largest concise Abelian subgroup C1 NOp 1

Standard orientation:

| Center<br>Number | Atomic<br>Number | Atomic<br>Type | Coordinates (Angstroms) |           |           |
|------------------|------------------|----------------|-------------------------|-----------|-----------|
|                  |                  |                | X                       | Y         | Z         |
| 1                | 6                | 0              | 1.100582                | -1.200399 | 0.000004  |
| 2                | 6                | 0              | -0.288737               | -1.209534 | 0.000000  |
| 3                | 6                | 0              | -1.061767               | 0.000025  | -0.000051 |
| 4                | 6                | 0              | -0.288740               | 1.209539  | 0.000000  |
| 5                | 6                | 0              | 1.100613                | 1.200376  | 0.000004  |
| 6                | 6                | 0              | 1.822011                | -0.000001 | -0.000010 |
| 7                | 1                | 0              | 1.635124                | -2.146977 | 0.000016  |
| 8                | 1                | 0              | -0.829749               | -2.152940 | 0.000023  |
| 9                | 1                | 0              | -0.829677               | 2.152988  | 0.000023  |
| 10               | 1                | 0              | 1.635129                | 2.146968  | 0.000016  |
| 11               | 1                | 0              | 2.905516                | -0.000033 | -0.000003 |
| 12               | 8                | 0              | -2.352514               | -0.000006 | 0.000031  |

Rotational constants (GHZ):      5.7216165      2.6877790      1.8287213

**Thymol**

Electronic Energy -464.866778

Stoichiometry C<sub>10</sub>H<sub>14</sub>OFramework group C1[X(C<sub>10</sub>H<sub>14</sub>O)]

Deg. of freedom 69

Full point group C1 NOp 1

Largest Abelian subgroup C1 NOp 1

Largest concise Abelian subgroup C1 NOp 1

Standard orientation:

| Center<br>Number | Atomic<br>Number | Atomic<br>Type | Coordinates (Angstroms) |           |           |
|------------------|------------------|----------------|-------------------------|-----------|-----------|
|                  |                  |                | X                       | Y         | Z         |
| 1                | 6                | 0              | -2.107781               | -0.021454 | -0.187754 |
| 2                | 1                | 0              | -2.330293               | 0.790697  | -0.887009 |
| 3                | 6                | 0              | -0.591289               | -0.134523 | -0.117509 |
| 4                | 6                | 0              | 0.082994                | -1.342778 | 0.056621  |
| 5                | 6                | 0              | 0.203688                | 1.022628  | -0.199970 |
| 6                | 6                | 0              | 1.474561                | -1.414470 | 0.145178  |
| 7                | 1                | 0              | -0.488081               | -2.261457 | 0.120563  |
| 8                | 6                | 0              | 1.592261                | 0.960132  | -0.116994 |
| 9                | 6                | 0              | 2.252007                | -0.260774 | 0.058190  |
| 10               | 1                | 0              | 1.953923                | -2.378254 | 0.278937  |
| 11               | 1                | 0              | 2.170042                | 1.879284  | -0.190230 |
| 12               | 6                | 0              | -2.688318               | 0.387177  | 1.181902  |
| 13               | 1                | 0              | -3.771361               | 0.530488  | 1.114376  |
| 14               | 1                | 0              | -2.494853               | -0.388161 | 1.929998  |
| 15               | 1                | 0              | -2.244641               | 1.320169  | 1.535074  |
| 16               | 6                | 0              | -2.797510               | -1.287372 | -0.714567 |
| 17               | 1                | 0              | -3.866133               | -1.099279 | -0.850843 |
| 18               | 1                | 0              | -2.384745               | -1.600540 | -1.677317 |
| 19               | 1                | 0              | -2.704762               | -2.125319 | -0.016925 |
| 20               | 6                | 0              | 3.758372                | -0.311220 | 0.145996  |
| 21               | 1                | 0              | 4.223821                | 0.082994  | -0.762945 |
| 22               | 1                | 0              | 4.128464                | 0.285502  | 0.985718  |
| 23               | 1                | 0              | 4.110783                | -1.335196 | 0.283795  |
| 24               | 8                | 0              | -0.447127               | 2.222964  | -0.366657 |
| 25               | 1                | 0              | 0.200934                | 2.931279  | -0.436494 |

Rotational constants (GHZ):      2.0317868      0.7327491      0.5894444

**Thymolate**

Electronic Energy -464.389191

Stoichiometry C10H13O(1-)

Framework group C1[X(C10H13O)]

Deg. of freedom 66

Full point group C1 NOp 1

Largest Abelian subgroup C1 NOp 1

Largest concise Abelian subgroup C1 NOp 1

Standard orientation:

| Center<br>Number            | Atomic<br>Number | Atomic<br>Type | Coordinates (Angstroms) |           |           |
|-----------------------------|------------------|----------------|-------------------------|-----------|-----------|
|                             |                  |                | X                       | Y         | Z         |
| 1                           | 6                | 0              | -2.094908               | -0.022872 | -0.209917 |
| 2                           | 1                | 0              | -2.295056               | 0.750589  | -0.961864 |
| 3                           | 6                | 0              | -0.582297               | -0.124388 | -0.120879 |
| 4                           | 6                | 0              | 0.095202                | -1.320008 | 0.077991  |
| 5                           | 6                | 0              | 0.160141                | 1.124495  | -0.227321 |
| 6                           | 6                | 0              | 1.493530                | -1.392901 | 0.179378  |
| 7                           | 1                | 0              | -0.470515               | -2.246291 | 0.160098  |
| 8                           | 6                | 0              | 1.590270                | 0.998644  | -0.126821 |
| 9                           | 6                | 0              | 2.243462                | -0.212688 | 0.070076  |
| 10                          | 1                | 0              | 1.984836                | -2.349371 | 0.336542  |
| 11                          | 1                | 0              | 2.161919                | 1.921138  | -0.207851 |
| 12                          | 6                | 0              | -2.694270               | 0.502475  | 1.111187  |
| 13                          | 1                | 0              | -3.775901               | 0.673850  | 1.019208  |
| 14                          | 1                | 0              | -2.530798               | -0.216820 | 1.922924  |
| 15                          | 1                | 0              | -2.216379               | 1.447113  | 1.376807  |
| 16                          | 6                | 0              | -2.801172               | -1.314164 | -0.645799 |
| 17                          | 1                | 0              | -3.874859               | -1.136668 | -0.782657 |
| 18                          | 1                | 0              | -2.395514               | -1.691977 | -1.589681 |
| 19                          | 1                | 0              | -2.697664               | -2.109332 | 0.101916  |
| 20                          | 6                | 0              | 3.757364                | -0.265144 | 0.123502  |
| 21                          | 1                | 0              | 4.190224                | -0.422710 | -0.873204 |
| 22                          | 1                | 0              | 4.174547                | 0.668486  | 0.514179  |
| 23                          | 1                | 0              | 4.106727                | -1.084582 | 0.761533  |
| 24                          | 8                | 0              | -0.420687               | 2.244485  | -0.395791 |
| Rotational constants (GHZ): |                  |                | 2.0872081               | 0.7370443 | 0.5919865 |

**- B3LYP 6-311G+dp/PCM****H<sub>2</sub>O**

Electronic Energy -76.466413

Stoichiometry H2O

Framework group CS[SG(H2O)]

Deg. of freedom 3

Full point group CS NOp 2

Largest Abelian subgroup CS NOp 2

Largest concise Abelian subgroup C1 NOp 1

Standard orientation:

| Center<br>Number            | Atomic<br>Number | Atomic<br>Type | Coordinates (Angstroms) |             |             |
|-----------------------------|------------------|----------------|-------------------------|-------------|-------------|
|                             |                  |                | X                       | Y           | Z           |
| 1                           | 8                | 0              | 0.000000                | 0.115552    | 0.000000    |
| 2                           | 1                | 0              | 0.768344                | -0.462208   | 0.000000    |
| 3                           | 1                | 0              | -0.768344               | -0.462205   | 0.000000    |
| Rotational constants (GHZ): |                  |                | 845.7772941             | 424.7084360 | 282.7334013 |

**OH**

Electronic Energy -75.959302

Stoichiometry HO(1-)

Framework group C\*V[C\*(HO)]

Deg. of freedom 1

Full point group C\*V NOp 4

Largest Abelian subgroup C2V NOp 4

Largest concise Abelian subgroup C1 NOp 1

Standard orientation:

| Center<br>Number | Atomic<br>Number | Atomic<br>Type | Coordinates (Angstroms) |          |           |
|------------------|------------------|----------------|-------------------------|----------|-----------|
|                  |                  |                | X                       | Y        | Z         |
| 1                | 8                | 0              | 0.000000                | 0.000000 | 0.106682  |
| 2                | 1                | 0              | 0.000000                | 0.000000 | -0.853456 |

Rotational constants (GHZ): 0.0000000 578.2316725 578.2316725

### Phenol

Electronic Energy -307.565572

Stoichiometry C6H6O

Framework group C1[X(C6H6O)]

Deg. of freedom 33

Full point group C1 NOp 1

Largest Abelian subgroup C1 NOp 1

Largest concise Abelian subgroup C1 NOp 1

Standard orientation:

| Center<br>Number | Atomic<br>Number | Atomic<br>Type | Coordinates (Angstroms) |           |           |
|------------------|------------------|----------------|-------------------------|-----------|-----------|
|                  |                  |                | X                       | Y         | Z         |
| 1                | 6                | 0              | 1.169725                | -1.188837 | 0.000140  |
| 2                | 6                | 0              | -0.220965               | -1.221569 | 0.000068  |
| 3                | 6                | 0              | -0.938050               | -0.024019 | -0.000048 |
| 4                | 6                | 0              | -0.262697               | 1.197631  | -0.000091 |
| 5                | 6                | 0              | 1.131378                | 1.217225  | -0.000020 |
| 6                | 6                | 0              | 1.855157                | 0.027156  | 0.000096  |
| 7                | 1                | 0              | 1.721963                | -2.121987 | 0.000229  |
| 8                | 1                | 0              | -0.764029               | -2.158909 | 0.000100  |
| 9                | 1                | 0              | -0.822750               | 2.128459  | -0.000179 |
| 10               | 1                | 0              | 1.649034                | 2.169921  | -0.000055 |
| 11               | 1                | 0              | 2.938359                | 0.045552  | 0.000151  |
| 12               | 8                | 0              | -2.305367               | -0.110272 | -0.000112 |
| 13               | 1                | 0              | -2.686933               | 0.773622  | -0.000213 |

Rotational constants (GHZ): 5.6675172 2.6180498 1.7908059

### Phenolate

Electronic Energy -307.086020

Stoichiometry C6H5O(1-)

Framework group C1[X(C6H5O)]

Deg. of freedom 30

Full point group C1 NOp 1

Largest Abelian subgroup C1 NOp 1

Largest concise Abelian subgroup C1 NOp 1

Standard orientation:

| Center<br>Number | Atomic<br>Number | Atomic<br>Type | Coordinates (Angstroms) |           |           |
|------------------|------------------|----------------|-------------------------|-----------|-----------|
|                  |                  |                | X                       | Y         | Z         |
| 1                | 6                | 0              | 1.101013                | -1.200385 | 0.000003  |
| 2                | 6                | 0              | -0.288354               | -1.210289 | -0.000005 |
| 3                | 6                | 0              | -1.069337               | 0.000025  | -0.000062 |
| 4                | 6                | 0              | -0.288358               | 1.210294  | -0.000005 |
| 5                | 6                | 0              | 1.101041                | 1.200362  | 0.000003  |
| 6                | 6                | 0              | 1.824402                | 0.000000  | -0.000011 |
| 7                | 1                | 0              | 1.636379                | -2.147279 | 0.000019  |
| 8                | 1                | 0              | -0.828219               | -2.154432 | 0.000022  |
| 9                | 1                | 0              | -0.828150               | 2.154479  | 0.000022  |
| 10               | 1                | 0              | 1.636380                | 2.147271  | 0.000020  |
| 11               | 1                | 0              | 2.908177                | -0.000030 | 0.000002  |
| 12               | 8                | 0              | -2.350877               | -0.000007 | 0.000046  |

Rotational constants (GHZ): 5.7178249 2.6847752 1.8269434

### Thymol

Electronic Energy -464.866380

Stoichiometry C10H14O

Framework group C1[X(C10H14O)]



Deg. of freedom 69  
 Full point group C1 NOp 1  
 Largest Abelian subgroup C1 NOp 1  
 Largest concise Abelian subgroup C1 NOp 1  
 Standard orientation:

| Center<br>Number | Atomic<br>Number | Atomic<br>Type | Coordinates (Angstroms) |           |           |
|------------------|------------------|----------------|-------------------------|-----------|-----------|
|                  |                  |                | X                       | Y         | Z         |
| 1                | 6                | 0              | -2.110727               | -0.013677 | -0.182925 |
| 2                | 1                | 0              | -2.337036               | 0.812554  | -0.864077 |
| 3                | 6                | 0              | -0.593203               | -0.127329 | -0.116249 |
| 4                | 6                | 0              | 0.076045                | -1.340530 | 0.053663  |
| 5                | 6                | 0              | 0.208145                | 1.028414  | -0.196405 |
| 6                | 6                | 0              | 1.468316                | -1.418700 | 0.141952  |
| 7                | 1                | 0              | -0.499014               | -2.256978 | 0.116899  |
| 8                | 6                | 0              | 1.597494                | 0.959127  | -0.114527 |
| 9                | 6                | 0              | 2.251397                | -0.266445 | 0.057957  |
| 10               | 1                | 0              | 1.943097                | -2.385242 | 0.273381  |
| 11               | 1                | 0              | 2.178418                | 1.875197  | -0.186816 |
| 12               | 6                | 0              | -2.691902               | 0.360619  | 1.196540  |
| 13               | 1                | 0              | -3.773261               | 0.515373  | 1.129456  |
| 14               | 1                | 0              | -2.508830               | -0.439405 | 1.920967  |
| 15               | 1                | 0              | -2.240933               | 1.278135  | 1.580785  |
| 16               | 6                | 0              | -2.800366               | -1.267978 | -0.736872 |
| 17               | 1                | 0              | -3.870043               | -1.078245 | -0.861945 |
| 18               | 1                | 0              | -2.392767               | -1.555650 | -1.709852 |
| 19               | 1                | 0              | -2.699889               | -2.122481 | -0.060984 |
| 20               | 6                | 0              | 3.757644                | -0.323398 | 0.145540  |
| 21               | 1                | 0              | 4.223308                | 0.073335  | -0.761833 |
| 22               | 1                | 0              | 4.129037                | 0.272067  | 0.985197  |
| 23               | 1                | 0              | 4.105994                | -1.349125 | 0.281035  |
| 24               | 8                | 0              | -0.431888               | 2.234662  | -0.363136 |
| 25               | 1                | 0              | 0.219957                | 2.942556  | -0.429162 |

Rotational constants (GHZ): 2.0231982 0.7313600 0.5890827

### Thymolate

Electronic Energy -464.383413  
 Stoichiometry C10H13O(1-)  
 Framework group C1[X(C10H13O)]  
 Deg. of freedom 66  
 Full point group C1 NOp 1  
 Largest Abelian subgroup C1 NOp 1  
 Largest concise Abelian subgroup C1 NOp 1  
 Standard orientation:

| Center<br>Number | Atomic<br>Number | Atomic<br>Type | Coordinates (Angstroms) |           |           |
|------------------|------------------|----------------|-------------------------|-----------|-----------|
|                  |                  |                | X                       | Y         | Z         |
| 1                | 6                | 0              | -2.094908               | -0.022872 | -0.209917 |
| 2                | 1                | 0              | -2.295056               | 0.750589  | -0.961864 |
| 3                | 6                | 0              | -0.582297               | -0.124388 | -0.120879 |
| 4                | 6                | 0              | 0.095202                | -1.320008 | 0.077991  |
| 5                | 6                | 0              | 0.160141                | 1.124495  | -0.227321 |
| 6                | 6                | 0              | 1.493530                | -1.392901 | 0.179378  |
| 7                | 1                | 0              | -0.470515               | -2.246291 | 0.160098  |
| 8                | 6                | 0              | 1.590270                | 0.998644  | -0.126821 |
| 9                | 6                | 0              | 2.243462                | -0.212688 | 0.070076  |
| 10               | 1                | 0              | 1.984836                | -2.349371 | 0.336542  |
| 11               | 1                | 0              | 2.161919                | 1.921138  | -0.207851 |
| 12               | 6                | 0              | -2.694270               | 0.502475  | 1.111187  |
| 13               | 1                | 0              | -3.775901               | 0.673850  | 1.019208  |
| 14               | 1                | 0              | -2.530798               | -0.216820 | 1.922924  |
| 15               | 1                | 0              | -2.216379               | 1.447113  | 1.376807  |
| 16               | 6                | 0              | -2.801172               | -1.314164 | -0.645799 |
| 17               | 1                | 0              | -3.874859               | -1.136668 | -0.782657 |
| 18               | 1                | 0              | -2.395514               | -1.691977 | -1.589681 |
| 19               | 1                | 0              | -2.697664               | -2.109332 | 0.101916  |
| 20               | 6                | 0              | 3.757364                | -0.265144 | 0.123502  |
| 21               | 1                | 0              | 4.190224                | -0.422710 | -0.873204 |
| 22               | 1                | 0              | 4.174547                | 0.668486  | 0.514179  |

|    |   |   |           |           |           |
|----|---|---|-----------|-----------|-----------|
| 23 | 1 | 0 | 4.106727  | -1.084582 | 0.761533  |
| 24 | 8 | 0 | -0.420687 | 2.244485  | -0.395791 |

Rotational constants (GHZ):      2.0872081      0.7370443      0.5919865

## - B3LYP 6-311G+dp/CPCM

### H<sub>2</sub>O

Electronic Energy -76.466413

Stoichiometry H<sub>2</sub>O

Framework group CS[SG(H<sub>2</sub>O)]

Deg. of freedom 3

Full point group CS NOp 2

Largest Abelian subgroup CS NOp 2

Largest concise Abelian subgroup C1 NOp 1

Standard orientation:

| Center<br>Number | Atomic<br>Number | Atomic<br>Type | Coordinates (Angstroms) |           |          |
|------------------|------------------|----------------|-------------------------|-----------|----------|
|                  |                  |                | X                       | Y         | Z        |
| 1                | 8                | 0              | 0.000000                | 0.117985  | 0.000000 |
| 2                | 1                | 0              | 0.762188                | -0.471941 | 0.000000 |
| 3                | 1                | 0              | -0.762188               | -0.471941 | 0.000000 |

Rotational constants (GHZ):      811.2464689      431.5960605      281.7177332

### OH

Electronic Energy -75.959356

Stoichiometry HO(1-)

Framework group C\*V[C\*(HO)]

Deg. of freedom 1

Full point group C\*V NOp 4

Largest Abelian subgroup C2V NOp 4

Largest concise Abelian subgroup C1 NOp 1

Standard orientation:

| Center<br>Number | Atomic<br>Number | Atomic<br>Type | Coordinates (Angstroms) |          |           |
|------------------|------------------|----------------|-------------------------|----------|-----------|
|                  |                  |                | X                       | Y        | Z         |
| 1                | 8                | 0              | 0.000000                | 0.000000 | 0.107067  |
| 2                | 1                | 0              | 0.000000                | 0.000000 | -0.856533 |

Rotational constants (GHZ):      0.0000000      574.0845324      574.0845324

### Phenol

Electronic Energy -307.565635

Stoichiometry C<sub>6</sub>H<sub>6</sub>O

Framework group C1[X(C<sub>6</sub>H<sub>6</sub>O)]

Deg. of freedom 33

Full point group C1 NOp 1

Largest Abelian subgroup C1 NOp 1

Largest concise Abelian subgroup C1 NOp 1

Standard orientation:

| Center<br>Number | Atomic<br>Number | Atomic<br>Type | Coordinates (Angstroms) |           |           |
|------------------|------------------|----------------|-------------------------|-----------|-----------|
|                  |                  |                | X                       | Y         | Z         |
| 1                | 6                | 0              | 1.169725                | -1.188837 | 0.000140  |
| 2                | 6                | 0              | -0.220965               | -1.221569 | 0.000068  |
| 3                | 6                | 0              | -0.938050               | -0.024019 | -0.000048 |
| 4                | 6                | 0              | -0.262697               | 1.197631  | -0.000091 |
| 5                | 6                | 0              | 1.131378                | 1.217225  | -0.000020 |
| 6                | 6                | 0              | 1.855157                | 0.027156  | 0.000096  |
| 7                | 1                | 0              | 1.721963                | -2.121987 | 0.000229  |
| 8                | 1                | 0              | -0.764029               | -2.158909 | 0.000100  |
| 9                | 1                | 0              | -0.822750               | 2.128459  | -0.000179 |
| 10               | 1                | 0              | 1.649034                | 2.169921  | -0.000055 |
| 11               | 1                | 0              | 2.938359                | 0.045552  | 0.000151  |
| 12               | 8                | 0              | -2.305367               | -0.110272 | -0.000112 |
| 13               | 1                | 0              | -2.686933               | 0.773622  | -0.000213 |

Rotational constants (GHZ): 5.6675172 2.6180498 1.7908059

### Phenolate

Electronic Energy -307.086129

Stoichiometry C<sub>6</sub>H<sub>5</sub>O(1-)

Framework group C1[X(C<sub>6</sub>H<sub>5</sub>O)]

Deg. of freedom 30

Full point group C1 NOp 1

Largest Abelian subgroup C1 NOp 1

Largest concise Abelian subgroup C1 NOp 1

Standard orientation:

| Center<br>Number | Atomic<br>Number | Atomic<br>Type | Coordinates (Angstroms) |           |           |
|------------------|------------------|----------------|-------------------------|-----------|-----------|
|                  |                  |                | X                       | Y         | Z         |
| 1                | 6                | 0              | 1.101592                | -1.200744 | -0.000018 |
| 2                | 6                | 0              | -0.289697               | -1.208834 | 0.000019  |
| 3                | 6                | 0              | -1.062832               | 0.000002  | 0.000214  |
| 4                | 6                | 0              | -0.289698               | 1.208837  | 0.000019  |
| 5                | 6                | 0              | 1.101595                | 1.200740  | -0.000017 |
| 6                | 6                | 0              | 1.822963                | 0.000000  | 0.000021  |
| 7                | 1                | 0              | 1.635932                | -2.147529 | -0.000083 |
| 8                | 1                | 0              | -0.827076               | -2.153844 | -0.000072 |
| 9                | 1                | 0              | -0.827069               | 2.153853  | -0.000071 |
| 10               | 1                | 0              | 1.635931                | 2.147528  | -0.000083 |
| 11               | 1                | 0              | 2.907122                | -0.000003 | -0.000020 |
| 12               | 8                | 0              | -2.353548               | -0.000002 | -0.000138 |

Rotational constants (GHZ): 5.7221218 2.6846711 1.8273336

### Thymol

Electronic Energy -464.866446

Stoichiometry C<sub>10</sub>H<sub>14</sub>O

Framework group C1[X(C<sub>10</sub>H<sub>14</sub>O)]

Deg. of freedom 69

Full point group C1 NOp 1

Largest Abelian subgroup C1 NOp 1

Largest concise Abelian subgroup C1 NOp 1

Standard orientation:

| Center<br>Number | Atomic<br>Number | Atomic<br>Type | Coordinates (Angstroms) |           |           |
|------------------|------------------|----------------|-------------------------|-----------|-----------|
|                  |                  |                | X                       | Y         | Z         |
| 1                | 6                | 0              | -2.110842               | -0.006333 | -0.176082 |
| 2                | 1                | 0              | -2.338244               | 0.839387  | -0.831946 |
| 3                | 6                | 0              | -0.593605               | -0.121771 | -0.114357 |
| 4                | 6                | 0              | 0.072619                | -1.336780 | 0.056315  |
| 5                | 6                | 0              | 0.209734                | 1.031333  | -0.194530 |
| 6                | 6                | 0              | 1.464525                | -1.418997 | 0.142203  |
| 7                | 1                | 0              | -0.505177               | -2.251382 | 0.121395  |
| 8                | 6                | 0              | 1.599556                | 0.958266  | -0.114999 |
| 9                | 6                | 0              | 2.250472                | -0.268628 | 0.056187  |
| 10               | 1                | 0              | 1.937116                | -2.386600 | 0.273288  |
| 11               | 1                | 0              | 2.182354                | 1.873038  | -0.187449 |
| 12               | 6                | 0              | -2.689883               | 0.326998  | 1.214627  |
| 13               | 1                | 0              | -3.771788               | 0.480747  | 1.154797  |
| 14               | 1                | 0              | -2.502484               | -0.492453 | 1.915902  |
| 15               | 1                | 0              | -2.240426               | 1.234445  | 1.624595  |
| 16               | 6                | 0              | -2.800983               | -1.244057 | -0.767381 |
| 17               | 1                | 0              | -3.870553               | -1.050119 | -0.886622 |
| 18               | 1                | 0              | -2.393072               | -1.501507 | -1.748685 |
| 19               | 1                | 0              | -2.700426               | -2.118775 | -0.118208 |
| 20               | 6                | 0              | 3.756941                | -0.329671 | 0.140692  |
| 21               | 1                | 0              | 4.221414                | 0.065686  | -0.767920 |
| 22               | 1                | 0              | 4.131413                | 0.266111  | 0.978773  |
| 23               | 1                | 0              | 4.102609                | -1.356110 | 0.276254  |
| 24               | 8                | 0              | -0.428558               | 2.238644  | -0.356048 |
| 25               | 1                | 0              | 0.224535                | 2.946227  | -0.411836 |

Rotational constants (GHZ): 2.0214315 0.7304210 0.5900148

**Thymolate**

Electronic Energy -464.383580

Stoichiometry C10H13O(1-)

Framework group C1[X(C10H13O)]

Deg. of freedom 66

Full point group C1 NOp 1

Largest Abelian subgroup C1 NOp 1

Largest concise Abelian subgroup C1 NOp 1

Standard orientation:

| Center<br>Number | Atomic<br>Number | Atomic<br>Type | Coordinates (Angstroms) |           |           |
|------------------|------------------|----------------|-------------------------|-----------|-----------|
|                  |                  |                | X                       | Y         | Z         |
| 1                | 6                | 0              | -2.094908               | -0.022872 | -0.209917 |
| 2                | 1                | 0              | -2.295056               | 0.750589  | -0.961864 |
| 3                | 6                | 0              | -0.582297               | -0.124388 | -0.120879 |
| 4                | 6                | 0              | 0.095202                | -1.320008 | 0.077991  |
| 5                | 6                | 0              | 0.160141                | 1.124495  | -0.227321 |
| 6                | 6                | 0              | 1.493530                | -1.392901 | 0.179378  |
| 7                | 1                | 0              | -0.470515               | -2.246291 | 0.160098  |
| 8                | 6                | 0              | 1.590270                | 0.998644  | -0.126821 |
| 9                | 6                | 0              | 2.243462                | -0.212688 | 0.070076  |
| 10               | 1                | 0              | 1.984836                | -2.349371 | 0.336542  |
| 11               | 1                | 0              | 2.161919                | 1.921138  | -0.207851 |
| 12               | 6                | 0              | -2.694270               | 0.502475  | 1.111187  |
| 13               | 1                | 0              | -3.775901               | 0.673850  | 1.019208  |
| 14               | 1                | 0              | -2.530798               | -0.216820 | 1.922924  |
| 15               | 1                | 0              | -2.216379               | 1.447113  | 1.376807  |
| 16               | 6                | 0              | -2.801172               | -1.314164 | -0.645799 |
| 17               | 1                | 0              | -3.874859               | -1.136668 | -0.782657 |
| 18               | 1                | 0              | -2.395514               | -1.691977 | -1.589681 |
| 19               | 1                | 0              | -2.697664               | -2.109332 | 0.101916  |
| 20               | 6                | 0              | 3.757364                | -0.265144 | 0.123502  |
| 21               | 1                | 0              | 4.190224                | -0.422710 | -0.873204 |
| 22               | 1                | 0              | 4.174547                | 0.668486  | 0.514179  |
| 23               | 1                | 0              | 4.106727                | -1.084582 | 0.761533  |
| 24               | 8                | 0              | -0.420687               | 2.244485  | -0.395791 |

Rotational constants (GHZ): 2.0872081 0.7370443 0.5919865

**- B3PW91 6-311G+dp/SMD****H<sub>2</sub>O**

Electronic Energy -76.441720

Stoichiometry H2O

Framework group CS[SG(H2O)]

Deg. of freedom 3

Full point group CS NOp 2

Largest Abelian subgroup CS NOp 2

Largest concise Abelian subgroup C1 NOp 1

Standard orientation:

| Center<br>Number | Atomic<br>Number | Atomic<br>Type | Coordinates (Angstroms) |           |          |
|------------------|------------------|----------------|-------------------------|-----------|----------|
|                  |                  |                | X                       | Y         | Z        |
| 1                | 8                | 0              | 0.000000                | 0.115552  | 0.000000 |
| 2                | 1                | 0              | 0.768344                | -0.462208 | 0.000000 |
| 3                | 1                | 0              | -0.768344               | -0.462205 | 0.000000 |

Rotational constants (GHZ): 845.7772941 424.7084360 282.7334013

**OH**

Electronic Energy -75.944505

Stoichiometry HO(1-)

Framework group C\*[C\*(HO)]

Deg. of freedom 1

Full point group C\*V NOp 4

Largest Abelian subgroup C2V NOp 4

Largest concise Abelian subgroup C1 NOp 1

Standard orientation:

| Center<br>Number | Atomic<br>Number | Atomic<br>Type | Coordinates (Angstroms) |          |           |
|------------------|------------------|----------------|-------------------------|----------|-----------|
|                  |                  |                | X                       | Y        | Z         |
| 1                | 8                | 0              | 0.000000                | 0.000000 | 0.106682  |
| 2                | 1                | 0              | 0.000000                | 0.000000 | -0.853456 |

Rotational constants (GHZ): 0.0000000 578.2316725 578.2316725

#### Phenol

Electronic Energy -307.444461

Stoichiometry C<sub>6</sub>H<sub>6</sub>O

Framework group C1[X(C<sub>6</sub>H<sub>6</sub>O)]

Deg. of freedom 33

Full point group C1 NOp 1

Largest Abelian subgroup C1 NOp 1

Largest concise Abelian subgroup C1 NOp 1

Standard orientation:

| Center<br>Number | Atomic<br>Number | Atomic<br>Type | Coordinates (Angstroms) |           |           |
|------------------|------------------|----------------|-------------------------|-----------|-----------|
|                  |                  |                | X                       | Y         | Z         |
| 1                | 6                | 0              | 1.168101                | -1.186116 | 0.000138  |
| 2                | 6                | 0              | -0.220169               | -1.219976 | 0.000067  |
| 3                | 6                | 0              | -0.939066               | -0.025077 | -0.000047 |
| 4                | 6                | 0              | -0.263529               | 1.195022  | -0.000091 |
| 5                | 6                | 0              | 1.127883                | 1.215468  | -0.000021 |
| 6                | 6                | 0              | 1.851976                | 0.028107  | 0.000095  |
| 7                | 1                | 0              | 1.721218                | -2.119945 | 0.000227  |
| 8                | 1                | 0              | -0.762720               | -2.158768 | 0.000098  |
| 9                | 1                | 0              | -0.824807               | 2.126490  | -0.000180 |
| 10               | 1                | 0              | 1.645039                | 2.169605  | -0.000056 |
| 11               | 1                | 0              | 2.936100                | 0.047458  | 0.000150  |
| 12               | 8                | 0              | -2.298757               | -0.110357 | -0.000108 |
| 13               | 1                | 0              | -2.675950               | 0.773447  | -0.000219 |

Rotational constants (GHZ): 5.6846147 2.6293820 1.7978145

#### Phenolate

Electronic Energy -306.967570

Stoichiometry C<sub>6</sub>H<sub>5</sub>O(1-)

Framework group C1[X(C<sub>6</sub>H<sub>5</sub>O)]

Deg. of freedom 30

Full point group C1 NOp 1

Largest Abelian subgroup C1 NOp 1

Largest concise Abelian subgroup C1 NOp 1

Standard orientation:

| Center<br>Number | Atomic<br>Number | Atomic<br>Type | Coordinates (Angstroms) |           |           |
|------------------|------------------|----------------|-------------------------|-----------|-----------|
|                  |                  |                | X                       | Y         | Z         |
| 1                | 6                | 0              | -1.098429               | -1.197480 | 0.000008  |
| 2                | 6                | 0              | 0.287144                | -1.208693 | -0.000006 |
| 3                | 6                | 0              | 1.077535                | 0.000050  | -0.000058 |
| 4                | 6                | 0              | 0.287157                | 1.208713  | -0.000005 |
| 5                | 6                | 0              | -1.098480               | 1.197438  | 0.000006  |
| 6                | 6                | 0              | -1.825642               | -0.000005 | 0.000004  |
| 7                | 1                | 0              | -1.635179               | -2.147169 | 0.000029  |
| 8                | 1                | 0              | 0.831125                | -2.151400 | 0.000005  |
| 9                | 1                | 0              | 0.830978                | 2.151511  | 0.000009  |
| 10               | 1                | 0              | -1.635190               | 2.147147  | 0.000025  |
| 11               | 1                | 0              | -2.912018               | -0.000060 | -0.000008 |
| 12               | 8                | 0              | 2.343072                | -0.000021 | 0.000031  |

Rotational constants (GHZ): 5.7364512 2.6911837 1.8318121

#### Thymol

Electronic Energy -464.685962

Stoichiometry C<sub>10</sub>H<sub>14</sub>O

Framework group C1[X(C<sub>10</sub>H<sub>14</sub>O)]

Deg. of freedom 69

Full point group C1 NOp 1  
 Largest Abelian subgroup C1 NOp 1  
 Largest concise Abelian subgroup C1 NOp 1  
 Standard orientation:

| Center<br>Number | Atomic<br>Number | Atomic<br>Type | Coordinates (Angstroms) |           |           |
|------------------|------------------|----------------|-------------------------|-----------|-----------|
|                  |                  |                | X                       | Y         | Z         |
| 1                | 6                | 0              | -2.102627               | -0.021835 | -0.188280 |
| 2                | 1                | 0              | -2.325004               | 0.788879  | -0.891143 |
| 3                | 6                | 0              | -0.591866               | -0.133928 | -0.118531 |
| 4                | 6                | 0              | 0.081206                | -1.340220 | 0.054001  |
| 5                | 6                | 0              | 0.200576                | 1.022486  | -0.199677 |
| 6                | 6                | 0              | 1.470189                | -1.412258 | 0.143141  |
| 7                | 1                | 0              | -0.492049               | -2.259159 | 0.115705  |
| 8                | 6                | 0              | 1.587258                | 0.959079  | -0.115885 |
| 9                | 6                | 0              | 2.246232                | -0.259857 | 0.058395  |
| 10               | 1                | 0              | 1.950590                | -2.376760 | 0.275871  |
| 11               | 1                | 0              | 2.166149                | 1.878778  | -0.188297 |
| 12               | 6                | 0              | -2.676731               | 0.389226  | 1.176345  |
| 13               | 1                | 0              | -3.760682               | 0.531026  | 1.113273  |
| 14               | 1                | 0              | -2.478978               | -0.383735 | 1.926394  |
| 15               | 1                | 0              | -2.232574               | 1.324108  | 1.525527  |
| 16               | 6                | 0              | -2.787632               | -1.286353 | -0.706741 |
| 17               | 1                | 0              | -3.856712               | -1.100949 | -0.846755 |
| 18               | 1                | 0              | -2.372168               | -1.606254 | -1.666669 |
| 19               | 1                | 0              | -2.696380               | -2.119637 | -0.002397 |
| 20               | 6                | 0              | 3.747152                | -0.310223 | 0.146704  |
| 21               | 1                | 0              | 4.213197                | 0.085536  | -0.761648 |
| 22               | 1                | 0              | 4.116762                | 0.285339  | 0.987886  |
| 23               | 1                | 0              | 4.099810                | -1.334714 | 0.283149  |
| 24               | 8                | 0              | -0.447195               | 2.216267  | -0.366631 |
| 25               | 1                | 0              | 0.203048                | 2.920706  | -0.434673 |

Rotational constants (GHZ): 2.0412376 0.7375072 0.5927874

### Thymolate

Electronic Energy -464.206974

Stoichiometry C10H13O(1-)

Framework group C1[X(C10H13O)]

Deg. of freedom 66

Full point group C1 NOp 1

Largest Abelian subgroup C1 NOp 1

Largest concise Abelian subgroup C1 NOp 1

Standard orientation:

| Center<br>Number | Atomic<br>Number | Atomic<br>Type | Coordinates (Angstroms) |           |           |
|------------------|------------------|----------------|-------------------------|-----------|-----------|
|                  |                  |                | X                       | Y         | Z         |
| 1                | 6                | 0              | -2.088528               | -0.026439 | -0.210929 |
| 2                | 1                | 0              | -2.286134               | 0.742931  | -0.969841 |
| 3                | 6                | 0              | -0.581453               | -0.127125 | -0.122350 |
| 4                | 6                | 0              | 0.096100                | -1.320625 | 0.074286  |
| 5                | 6                | 0              | 0.154670                | 1.121654  | -0.227461 |
| 6                | 6                | 0              | 1.491883                | -1.391276 | 0.176099  |
| 7                | 1                | 0              | -0.470759               | -2.247901 | 0.153827  |
| 8                | 6                | 0              | 1.582076                | 0.998057  | -0.125332 |
| 9                | 6                | 0              | 2.237320                | -0.210475 | 0.069956  |
| 10               | 1                | 0              | 1.986495                | -2.347424 | 0.331395  |
| 11               | 1                | 0              | 2.153402                | 1.922127  | -0.204809 |
| 12               | 6                | 0              | -2.678407               | 0.510484  | 1.102160  |
| 13               | 1                | 0              | -3.760794               | 0.682143  | 1.016151  |
| 14               | 1                | 0              | -2.509106               | -0.200139 | 1.920808  |
| 15               | 1                | 0              | -2.196291               | 1.458040  | 1.352831  |
| 16               | 6                | 0              | -2.790980               | -1.317269 | -0.631066 |
| 17               | 1                | 0              | -3.865312               | -1.143590 | -0.770900 |
| 18               | 1                | 0              | -2.383401               | -1.706671 | -1.570023 |
| 19               | 1                | 0              | -2.687137               | -2.103273 | 0.127165  |
| 20               | 6                | 0              | 3.746001                | -0.258514 | 0.124620  |
| 21               | 1                | 0              | 4.179481                | -0.418377 | -0.871747 |
| 22               | 1                | 0              | 4.160468                | 0.677979  | 0.512290  |

|    |   |   |           |           |           |
|----|---|---|-----------|-----------|-----------|
| 23 | 1 | 0 | 4.097583  | -1.075040 | 0.765739  |
| 24 | 8 | 0 | -0.428825 | 2.236046  | -0.396598 |

---

Rotational constants (GHZ):      2.0970161      0.7426100      0.5955077

## - B3PW91 6-311G+dp/PCM

### H<sub>2</sub>O

Electronic Energy -76.436075

Stoichiometry H<sub>2</sub>O

Framework group CS[SG(H<sub>2</sub>O)]

Deg. of freedom 3

Full point group CS NOp 2

Largest Abelian subgroup CS NOp 2

Largest concise Abelian subgroup C1 NOp 1

Standard orientation:

| Center<br>Number | Atomic<br>Number | Atomic<br>Type | Coordinates (Angstroms) |           |          |
|------------------|------------------|----------------|-------------------------|-----------|----------|
|                  |                  |                | X                       | Y         | Z        |
| 1                | 8                | 0              | 0.000000                | 0.115552  | 0.000000 |
| 2                | 1                | 0              | 0.768344                | -0.462208 | 0.000000 |
| 3                | 1                | 0              | -0.768344               | -0.462205 | 0.000000 |

Rotational constants (GHZ):      845.7772941      424.7084360      282.7334013

### OH

Electronic Energy -75.924215

Stoichiometry HO(1-)

Framework group C\*V[C\*(HO)]

Deg. of freedom 1

Full point group C\*V NOp 4

Largest Abelian subgroup C2V NOp 4

Largest concise Abelian subgroup C1 NOp 1

Standard orientation:

| Center<br>Number | Atomic<br>Number | Atomic<br>Type | Coordinates (Angstroms) |          |           |
|------------------|------------------|----------------|-------------------------|----------|-----------|
|                  |                  |                | X                       | Y        | Z         |
| 1                | 8                | 0              | 0.000000                | 0.000000 | 0.106682  |
| 2                | 1                | 0              | 0.000000                | 0.000000 | -0.853456 |

Rotational constants (GHZ):      0.0000000      578.2316725      578.2316725

### Phenol

Electronic Energy -307.441667

Stoichiometry C<sub>6</sub>H<sub>6</sub>O

Framework group C1[X(C<sub>6</sub>H<sub>6</sub>O)]

Deg. of freedom 33

Full point group C1 NOp 1

Largest Abelian subgroup C1 NOp 1

Largest concise Abelian subgroup C1 NOp 1

Standard orientation:

| Center<br>Number | Atomic<br>Number | Atomic<br>Type | Coordinates (Angstroms) |           |           |
|------------------|------------------|----------------|-------------------------|-----------|-----------|
|                  |                  |                | X                       | Y         | Z         |
| 1                | 6                | 0              | 1.168101                | -1.186116 | 0.000138  |
| 2                | 6                | 0              | -0.220169               | -1.219976 | 0.000067  |
| 3                | 6                | 0              | -0.939066               | -0.025077 | -0.000047 |
| 4                | 6                | 0              | -0.263529               | 1.195022  | -0.000091 |
| 5                | 6                | 0              | 1.127883                | 1.215468  | -0.000021 |
| 6                | 6                | 0              | 1.851976                | 0.028107  | 0.000095  |
| 7                | 1                | 0              | 1.721218                | -2.119945 | 0.000227  |
| 8                | 1                | 0              | -0.762720               | -2.158768 | 0.000098  |
| 9                | 1                | 0              | -0.824807               | 2.126490  | -0.000180 |
| 10               | 1                | 0              | 1.645039                | 2.169605  | -0.000056 |
| 11               | 1                | 0              | 2.936100                | 0.047458  | 0.000150  |
| 12               | 8                | 0              | -2.298757               | -0.110357 | -0.000108 |

|    |   |   |           |          |           |
|----|---|---|-----------|----------|-----------|
| 13 | 1 | 0 | -2.675950 | 0.773447 | -0.000219 |
|----|---|---|-----------|----------|-----------|

---

|                             |           |           |           |
|-----------------------------|-----------|-----------|-----------|
| Rotational constants (GHZ): | 5.6846147 | 2.6293820 | 1.7978145 |
|-----------------------------|-----------|-----------|-----------|

#### Phenolate

Electronic Energy -306.959968  
 Stoichiometry C<sub>6</sub>H<sub>5</sub>O(1-)  
 Framework group C1[X(C<sub>6</sub>H<sub>5</sub>O)]  
 Deg. of freedom 30  
 Full point group C1 NOp 1  
 Largest Abelian subgroup C1 NOp 1  
 Largest concise Abelian subgroup C1 NOp 1  
 Standard orientation:

| Center<br>Number | Atomic<br>Number | Atomic<br>Type | Coordinates (Angstroms) |           |           |
|------------------|------------------|----------------|-------------------------|-----------|-----------|
|                  |                  |                | X                       | Y         | Z         |
| 1                | 6                | 0              | 1.099816                | -1.198446 | 0.000037  |
| 2                | 6                | 0              | -0.289275               | -1.206479 | -0.000063 |
| 3                | 6                | 0              | -1.063417               | 0.000001  | -0.000597 |
| 4                | 6                | 0              | -0.289276               | 1.206480  | -0.000063 |
| 5                | 6                | 0              | 1.099817                | 1.198445  | 0.000037  |
| 6                | 6                | 0              | 1.820982                | 0.000000  | -0.000060 |
| 7                | 1                | 0              | 1.634270                | -2.146549 | 0.000217  |
| 8                | 1                | 0              | -0.826676               | -2.152720 | 0.000174  |
| 9                | 1                | 0              | -0.826673               | 2.152723  | 0.000174  |
| 10               | 1                | 0              | 1.634269                | 2.146549  | 0.000217  |
| 11               | 1                | 0              | 2.906145                | -0.000001 | 0.000032  |
| 12               | 8                | 0              | -2.349152               | -0.000001 | 0.000429  |

|                             |           |           |           |
|-----------------------------|-----------|-----------|-----------|
| Rotational constants (GHZ): | 5.7407805 | 2.6921047 | 1.8326803 |
|-----------------------------|-----------|-----------|-----------|

#### Thymol

Electronic Energy -464.685322  
 Stoichiometry C<sub>10</sub>H<sub>14</sub>O  
 Framework group C1[X(C<sub>10</sub>H<sub>14</sub>O)]  
 Deg. of freedom 69  
 Full point group C1 NOp 1  
 Largest Abelian subgroup C1 NOp 1  
 Largest concise Abelian subgroup C1 NOp 1  
 Standard orientation:

| Center<br>Number | Atomic<br>Number | Atomic<br>Type | Coordinates (Angstroms) |           |           |
|------------------|------------------|----------------|-------------------------|-----------|-----------|
|                  |                  |                | X                       | Y         | Z         |
| 1                | 6                | 0              | -2.105545               | -0.007747 | -0.177563 |
| 2                | 1                | 0              | -2.332779               | 0.834326  | -0.840281 |
| 3                | 6                | 0              | -0.593988               | -0.122067 | -0.116110 |
| 4                | 6                | 0              | 0.071516                | -1.334790 | 0.053361  |
| 5                | 6                | 0              | 0.206270                | 1.031008  | -0.195069 |
| 6                | 6                | 0              | 1.461005                | -1.416737 | 0.140333  |
| 7                | 1                | 0              | -0.507996               | -2.250000 | 0.116166  |
| 8                | 6                | 0              | 1.594341                | 0.957485  | -0.114336 |
| 9                | 6                | 0              | 2.244989                | -0.267222 | 0.056552  |
| 10               | 1                | 0              | 1.935066                | -2.384870 | 0.270793  |
| 11               | 1                | 0              | 2.177845                | 1.873116  | -0.186056 |
| 12               | 6                | 0              | -2.677571               | 0.334008  | 1.207143  |
| 13               | 1                | 0              | -3.760227               | 0.487222  | 1.151145  |
| 14               | 1                | 0              | -2.487271               | -0.481198 | 1.913348  |
| 15               | 1                | 0              | -2.226466               | 1.244385  | 1.610024  |
| 16               | 6                | 0              | -2.791635               | -1.246582 | -0.755063 |
| 17               | 1                | 0              | -3.861724               | -1.055188 | -0.878054 |
| 18               | 1                | 0              | -2.382163               | -1.515228 | -1.733268 |
| 19               | 1                | 0              | -2.692470               | -2.114538 | -0.095573 |
| 20               | 6                | 0              | 3.746041                | -0.327421 | 0.142170  |
| 21               | 1                | 0              | 4.211391                | 0.069735  | -0.765629 |
| 22               | 1                | 0              | 4.119501                | 0.267728  | 0.981616  |
| 23               | 1                | 0              | 4.092530                | -1.354159 | 0.276729  |
| 24               | 8                | 0              | -0.430124               | 2.230403  | -0.357220 |
| 25               | 1                | 0              | 0.223226                | 2.935829  | -0.411709 |

|                             |           |           |           |
|-----------------------------|-----------|-----------|-----------|
| Rotational constants (GHZ): | 2.0314549 | 0.7352444 | 0.5932521 |
|-----------------------------|-----------|-----------|-----------|



**Thymolate**

Electronic Energy -464.200492

Stoichiometry C<sub>10</sub>H<sub>13</sub>O(1-)Framework group C1[X(C<sub>10</sub>H<sub>13</sub>O)]

Deg. of freedom 66

Full point group C<sub>1</sub> NOp 1Largest Abelian subgroup C<sub>1</sub> NOp 1Largest concise Abelian subgroup C<sub>1</sub> NOp 1

Standard orientation:

| Center<br>Number | Atomic<br>Number | Atomic<br>Type | Coordinates (Angstroms) |           |           |
|------------------|------------------|----------------|-------------------------|-----------|-----------|
|                  |                  |                | X                       | Y         | Z         |
| 1                | 6                | 0              | -2.088528               | -0.026439 | -0.210929 |
| 2                | 1                | 0              | -2.286134               | 0.742931  | -0.969841 |
| 3                | 6                | 0              | -0.581453               | -0.127125 | -0.122350 |
| 4                | 6                | 0              | 0.096100                | -1.320625 | 0.074286  |
| 5                | 6                | 0              | 0.154670                | 1.121654  | -0.227461 |
| 6                | 6                | 0              | 1.491883                | -1.391276 | 0.176099  |
| 7                | 1                | 0              | -0.470759               | -2.247901 | 0.153827  |
| 8                | 6                | 0              | 1.582076                | 0.998057  | -0.125332 |
| 9                | 6                | 0              | 2.237320                | -0.210475 | 0.069956  |
| 10               | 1                | 0              | 1.986495                | -2.347424 | 0.331395  |
| 11               | 1                | 0              | 2.153402                | 1.922127  | -0.204809 |
| 12               | 6                | 0              | -2.678407               | 0.510484  | 1.102160  |
| 13               | 1                | 0              | -3.760794               | 0.682143  | 1.016151  |
| 14               | 1                | 0              | -2.509106               | -0.200139 | 1.920808  |
| 15               | 1                | 0              | -2.196291               | 1.458040  | 1.352831  |
| 16               | 6                | 0              | -2.790980               | -1.317269 | -0.631066 |
| 17               | 1                | 0              | -3.865312               | -1.143590 | -0.770900 |
| 18               | 1                | 0              | -2.383401               | -1.706671 | -1.570023 |
| 19               | 1                | 0              | -2.687137               | -2.103273 | 0.127165  |
| 20               | 6                | 0              | 3.746001                | -0.258514 | 0.124620  |
| 21               | 1                | 0              | 4.179481                | -0.418377 | -0.871747 |
| 22               | 1                | 0              | 4.160468                | 0.677979  | 0.512290  |
| 23               | 1                | 0              | 4.097583                | -1.075040 | 0.765739  |
| 24               | 8                | 0              | -0.428825               | 2.236046  | -0.396598 |

Rotational constants (GHZ): 2.0970161 0.7426100 0.5955077

**- B3PW91 6-311G+dp/CPCM****H<sub>2</sub>O**

Electronic Energy -76.466463

Stoichiometry H<sub>2</sub>OFramework group CS[SG(H<sub>2</sub>O)]

Deg. of freedom 3

Full point group CS NOp 2

Largest Abelian subgroup CS NOp 2

Largest concise Abelian subgroup C<sub>1</sub> NOp 1

Standard orientation:

| Center<br>Number | Atomic<br>Number | Atomic<br>Type | Coordinates (Angstroms) |           |          |
|------------------|------------------|----------------|-------------------------|-----------|----------|
|                  |                  |                | X                       | Y         | Z        |
| 1                | 8                | 0              | 0.000000                | 0.115552  | 0.000000 |
| 2                | 1                | 0              | 0.768344                | -0.462208 | 0.000000 |
| 3                | 1                | 0              | -0.768344               | -0.462205 | 0.000000 |

Rotational constants (GHZ): 845.7772941 424.7084360 282.7334013

**OH<sup>-</sup>**

Electronic Energy -75.924270

Stoichiometry HO(1-)

Framework group C\*V[C\*(HO)]

Deg. of freedom 1

Full point group C\*V NOp 4

Largest Abelian subgroup C<sub>2</sub>V NOp 4Largest concise Abelian subgroup C<sub>1</sub> NOp 1

Standard orientation:

| Center<br>Number | Atomic<br>Number | Atomic<br>Type | Coordinates (Angstroms) |          |           |
|------------------|------------------|----------------|-------------------------|----------|-----------|
|                  |                  |                | X                       | Y        | Z         |
| 1                | 8                | 0              | 0.000000                | 0.000000 | 0.106682  |
| 2                | 1                | 0              | 0.000000                | 0.000000 | -0.853456 |

Rotational constants (GHZ): 0.0000000 578.2316725 578.2316725

### Phenol

Electronic Energy -307.441733

Stoichiometry C<sub>6</sub>H<sub>6</sub>O

Framework group C1[X(C<sub>6</sub>H<sub>6</sub>O)]

Deg. of freedom 33

Full point group C1 NOp 1

Largest Abelian subgroup C1 NOp 1

Largest concise Abelian subgroup C1 NOp 1

Standard orientation:

| Center<br>Number | Atomic<br>Number | Atomic<br>Type | Coordinates (Angstroms) |           |           |
|------------------|------------------|----------------|-------------------------|-----------|-----------|
|                  |                  |                | X                       | Y         | Z         |
| 1                | 6                | 0              | 1.168101                | -1.186116 | 0.000138  |
| 2                | 6                | 0              | -0.220169               | -1.219976 | 0.000067  |
| 3                | 6                | 0              | -0.939066               | -0.025077 | -0.000047 |
| 4                | 6                | 0              | -0.263529               | 1.195022  | -0.000091 |
| 5                | 6                | 0              | 1.127883                | 1.215468  | -0.000021 |
| 6                | 6                | 0              | 1.851976                | 0.028107  | 0.000095  |
| 7                | 1                | 0              | 1.721218                | -2.119945 | 0.000227  |
| 8                | 1                | 0              | -0.762720               | -2.158768 | 0.000098  |
| 9                | 1                | 0              | -0.824807               | 2.126490  | -0.000180 |
| 10               | 1                | 0              | 1.645039                | 2.169605  | -0.000056 |
| 11               | 1                | 0              | 2.936100                | 0.047458  | 0.000150  |
| 12               | 8                | 0              | -2.298757               | -0.110357 | -0.000108 |
| 13               | 1                | 0              | -2.675950               | 0.773447  | -0.000219 |

Rotational constants (GHZ): 5.6846147 2.6293820 1.7978145

### Phenolate

Electronic Energy -306.960080

Stoichiometry C<sub>6</sub>H<sub>5</sub>O(1-)

Framework group C1[X(C<sub>6</sub>H<sub>5</sub>O)]

Deg. of freedom 30

Full point group C1 NOp 1

Largest Abelian subgroup C1 NOp 1

Largest concise Abelian subgroup C1 NOp 1

Standard orientation:

| Center<br>Number | Atomic<br>Number | Atomic<br>Type | Coordinates (Angstroms) |           |           |
|------------------|------------------|----------------|-------------------------|-----------|-----------|
|                  |                  |                | X                       | Y         | Z         |
| 1                | 6                | 0              | -1.098429               | -1.197480 | 0.000008  |
| 2                | 6                | 0              | 0.287144                | -1.208693 | -0.000006 |
| 3                | 6                | 0              | 1.077535                | 0.000050  | -0.000058 |
| 4                | 6                | 0              | 0.287157                | 1.208713  | -0.000005 |
| 5                | 6                | 0              | -1.098480               | 1.197438  | 0.000006  |
| 6                | 6                | 0              | -1.825642               | -0.000005 | 0.000004  |
| 7                | 1                | 0              | -1.635179               | -2.147169 | 0.000029  |
| 8                | 1                | 0              | 0.831125                | -2.151400 | 0.000005  |
| 9                | 1                | 0              | 0.830978                | 2.151511  | 0.000009  |
| 10               | 1                | 0              | -1.635190               | 2.147147  | 0.000025  |
| 11               | 1                | 0              | -2.912018               | -0.000060 | -0.000008 |
| 12               | 8                | 0              | 2.343072                | -0.000021 | 0.000031  |

Rotational constants (GHZ): 5.7364512 2.6911837 1.8318121

### Thymol

Electronic Energy -464.685388

Stoichiometry C<sub>10</sub>H<sub>14</sub>O

Framework group C1[X(C<sub>10</sub>H<sub>14</sub>O)]

Deg. of freedom 69  
 Full point group C1 NOp 1  
 Largest Abelian subgroup C1 NOp 1  
 Largest concise Abelian subgroup C1 NOp 1  
 Standard orientation:

| Center<br>Number | Atomic<br>Number | Atomic<br>Type | Coordinates (Angstroms) |           |           |
|------------------|------------------|----------------|-------------------------|-----------|-----------|
|                  |                  |                | X                       | Y         | Z         |
| 1                | 6                | 0              | -2.102627               | -0.021835 | -0.188280 |
| 2                | 1                | 0              | -2.325004               | 0.788879  | -0.891143 |
| 3                | 6                | 0              | -0.591866               | -0.133928 | -0.118531 |
| 4                | 6                | 0              | 0.081206                | -1.340220 | 0.054001  |
| 5                | 6                | 0              | 0.200576                | 1.022486  | -0.199677 |
| 6                | 6                | 0              | 1.470189                | -1.412258 | 0.143141  |
| 7                | 1                | 0              | -0.492049               | -2.259159 | 0.115705  |
| 8                | 6                | 0              | 1.587258                | 0.959079  | -0.115885 |
| 9                | 6                | 0              | 2.246232                | -0.259857 | 0.058395  |
| 10               | 1                | 0              | 1.950590                | -2.376760 | 0.275871  |
| 11               | 1                | 0              | 2.166149                | 1.878778  | -0.188297 |
| 12               | 6                | 0              | -2.676731               | 0.389226  | 1.176345  |
| 13               | 1                | 0              | -3.760682               | 0.531026  | 1.113273  |
| 14               | 1                | 0              | -2.478978               | -0.383735 | 1.926394  |
| 15               | 1                | 0              | -2.232574               | 1.324108  | 1.525527  |
| 16               | 6                | 0              | -2.787632               | -1.286353 | -0.706741 |
| 17               | 1                | 0              | -3.856712               | -1.100949 | -0.846755 |
| 18               | 1                | 0              | -2.372168               | -1.606254 | -1.666669 |
| 19               | 1                | 0              | -2.696380               | -2.119637 | -0.002397 |
| 20               | 6                | 0              | 3.747152                | -0.310223 | 0.146704  |
| 21               | 1                | 0              | 4.213197                | 0.085536  | -0.761648 |
| 22               | 1                | 0              | 4.116762                | 0.285339  | 0.987886  |
| 23               | 1                | 0              | 4.099810                | -1.334714 | 0.283149  |
| 24               | 8                | 0              | -0.447195               | 2.216267  | -0.366631 |
| 25               | 1                | 0              | 0.203048                | 2.920706  | -0.434673 |

Rotational constants (GHZ): 2.0412376 0.7375072 0.5927874

### Thymolate

Electronic Energy -464.200663  
 Stoichiometry C10H13O(1-)  
 Framework group C1[X(C10H13O)]  
 Deg. of freedom 66  
 Full point group C1 NOp 1  
 Largest Abelian subgroup C1 NOp 1  
 Largest concise Abelian subgroup C1 NOp 1  
 Standard orientation:

| Center<br>Number | Atomic<br>Number | Atomic<br>Type | Coordinates (Angstroms) |           |           |
|------------------|------------------|----------------|-------------------------|-----------|-----------|
|                  |                  |                | X                       | Y         | Z         |
| 1                | 6                | 0              | -2.088528               | -0.026439 | -0.210929 |
| 2                | 1                | 0              | -2.286134               | 0.742931  | -0.969841 |
| 3                | 6                | 0              | -0.581453               | -0.127125 | -0.122350 |
| 4                | 6                | 0              | 0.096100                | -1.320625 | 0.074286  |
| 5                | 6                | 0              | 0.154670                | 1.121654  | -0.227461 |
| 6                | 6                | 0              | 1.491883                | -1.391276 | 0.176099  |
| 7                | 1                | 0              | -0.470759               | -2.247901 | 0.153827  |
| 8                | 6                | 0              | 1.582076                | 0.998057  | -0.125332 |
| 9                | 6                | 0              | 2.237320                | -0.210475 | 0.069956  |
| 10               | 1                | 0              | 1.986495                | -2.347424 | 0.331395  |
| 11               | 1                | 0              | 2.153402                | 1.922127  | -0.204809 |
| 12               | 6                | 0              | -2.678407               | 0.510484  | 1.102160  |
| 13               | 1                | 0              | -3.760794               | 0.682143  | 1.016151  |
| 14               | 1                | 0              | -2.509106               | -0.200139 | 1.920808  |
| 15               | 1                | 0              | -2.196291               | 1.458040  | 1.352831  |
| 16               | 6                | 0              | -2.790980               | -1.317269 | -0.631066 |
| 17               | 1                | 0              | -3.865312               | -1.143590 | -0.770900 |
| 18               | 1                | 0              | -2.383401               | -1.706671 | -1.570023 |
| 19               | 1                | 0              | -2.687137               | -2.103273 | 0.127165  |
| 20               | 6                | 0              | 3.746001                | -0.258514 | 0.124620  |
| 21               | 1                | 0              | 4.179481                | -0.418377 | -0.871747 |

|    |   |   |           |           |           |
|----|---|---|-----------|-----------|-----------|
| 22 | 1 | 0 | 4.160468  | 0.677979  | 0.512290  |
| 23 | 1 | 0 | 4.097583  | -1.075040 | 0.765739  |
| 24 | 8 | 0 | -0.428825 | 2.236046  | -0.396598 |

---

Rotational constants (GHZ):      2.0970161      0.7426100      0.5955077

## - wB97XD 6-311G+dp/SMD

### H<sub>2</sub>O

Electronic Energy -76.446101  
 Stoichiometry H2O  
 Framework group CS[SG(H2O)]  
 Deg. of freedom 3  
 Full point group CS NOp 2  
 Largest Abelian subgroup CS NOp 2  
 Largest concise Abelian subgroup C1 NOp 1  
 Standard orientation:

| Center<br>Number | Atomic<br>Number | Atomic<br>Type | Coordinates (Angstroms) |           |          |
|------------------|------------------|----------------|-------------------------|-----------|----------|
|                  |                  |                | X                       | Y         | Z        |
| 1                | 8                | 0              | 0.000000                | 0.115552  | 0.000000 |
| 2                | 1                | 0              | 0.768344                | -0.462208 | 0.000000 |
| 3                | 1                | 0              | -0.768344               | -0.462205 | 0.000000 |

---

Rotational constants (GHZ):      845.7772941      424.7084360      282.7334013

### OH<sup>-</sup>

Electronic Energy -75.949093  
 Stoichiometry HO(1-)  
 Framework group C\*V[C\*(HO)]  
 Deg. of freedom 1  
 Full point group C\*V NOp 4  
 Largest Abelian subgroup C2V NOp 4  
 Largest concise Abelian subgroup C1 NOp 1  
 Standard orientation:

| Center<br>Number | Atomic<br>Number | Atomic<br>Type | Coordinates (Angstroms) |          |           |
|------------------|------------------|----------------|-------------------------|----------|-----------|
|                  |                  |                | X                       | Y        | Z         |
| 1                | 8                | 0              | 0.000000                | 0.000000 | 0.106682  |
| 2                | 1                | 0              | 0.000000                | 0.000000 | -0.853456 |

---

Rotational constants (GHZ):      0.0000000      578.2316725      578.2316725

### Phenol

Electronic Energy -307.456324  
 Stoichiometry C6H6O  
 Framework group C1[X(C6H6O)]  
 Deg. of freedom 33  
 Full point group C1 NOp 1  
 Largest Abelian subgroup C1 NOp 1  
 Largest concise Abelian subgroup C1 NOp 1  
 Standard orientation:

| Center<br>Number | Atomic<br>Number | Atomic<br>Type | Coordinates (Angstroms) |           |           |
|------------------|------------------|----------------|-------------------------|-----------|-----------|
|                  |                  |                | X                       | Y         | Z         |
| 1                | 6                | 0              | 1.166365                | -1.185110 | 0.000138  |
| 2                | 6                | 0              | -0.220317               | -1.218357 | 0.000067  |
| 3                | 6                | 0              | -0.937315               | -0.024576 | -0.000047 |
| 4                | 6                | 0              | -0.263434               | 1.194125  | -0.000090 |
| 5                | 6                | 0              | 1.126691                | 1.213840  | -0.000021 |
| 6                | 6                | 0              | 1.849484                | 0.027865  | 0.000094  |
| 7                | 1                | 0              | 1.719159                | -2.117999 | 0.000227  |
| 8                | 1                | 0              | -0.762921               | -2.156095 | 0.000099  |
| 9                | 1                | 0              | -0.823336               | 2.125277  | -0.000179 |
| 10               | 1                | 0              | 1.643936                | 2.166813  | -0.000056 |
| 11               | 1                | 0              | 2.932644                | 0.047041  | 0.000150  |
| 12               | 8                | 0              | -2.295224               | -0.110072 | -0.000109 |

|    |   |   |           |          |           |
|----|---|---|-----------|----------|-----------|
| 13 | 1 | 0 | -2.676535 | 0.768815 | -0.000219 |
|----|---|---|-----------|----------|-----------|

---

Rotational constants (GHZ):      5.6970930      2.6365260      1.8024023

#### Phenolate

Electronic Energy -306.977872  
 Stoichiometry C<sub>6</sub>H<sub>5</sub>O(1-)  
 Framework group C1[X(C<sub>6</sub>H<sub>5</sub>O)]  
 Deg. of freedom 30  
 Full point group C1 NOp 1  
 Largest Abelian subgroup C1 NOp 1  
 Largest concise Abelian subgroup C1 NOp 1  
 Standard orientation:

| Center<br>Number | Atomic<br>Number | Atomic<br>Type | Coordinates (Angstroms) |           |           |
|------------------|------------------|----------------|-------------------------|-----------|-----------|
|                  |                  |                | X                       | Y         | Z         |
| 1                | 6                | 0              | -1.096527               | -1.196063 | 0.000004  |
| 2                | 6                | 0              | 0.287292                | -1.208230 | 0.000009  |
| 3                | 6                | 0              | 1.075469                | 0.000060  | -0.000011 |
| 4                | 6                | 0              | 0.287314                | 1.208277  | 0.000006  |
| 5                | 6                | 0              | -1.096562               | 1.196021  | 0.000009  |
| 6                | 6                | 0              | -1.822882               | -0.000008 | -0.000012 |
| 7                | 1                | 0              | -1.632640               | -2.144860 | 0.000012  |
| 8                | 1                | 0              | 0.830704                | -2.150205 | 0.000015  |
| 9                | 1                | 0              | 0.830590                | 2.150337  | 0.000004  |
| 10               | 1                | 0              | -1.632630               | 2.144832  | 0.000013  |
| 11               | 1                | 0              | -2.908351               | -0.000073 | -0.000040 |
| 12               | 8                | 0              | 2.338462                | -0.000047 | -0.000005 |

Rotational constants (GHZ):      5.7454342      2.7006297      1.8371031

#### Thymol

Electronic Energy -464.711087  
 Stoichiometry C<sub>10</sub>H<sub>14</sub>O  
 Framework group C1[X(C<sub>10</sub>H<sub>14</sub>O)]  
 Deg. of freedom 69  
 Full point group C1 NOp 1  
 Largest Abelian subgroup C1 NOp 1  
 Largest concise Abelian subgroup C1 NOp 1  
 Standard orientation:

| Center<br>Number | Atomic<br>Number | Atomic<br>Type | Coordinates (Angstroms) |           |           |
|------------------|------------------|----------------|-------------------------|-----------|-----------|
|                  |                  |                | X                       | Y         | Z         |
| 1                | 6                | 0              | -2.104768               | -0.011752 | -0.189272 |
| 2                | 1                | 0              | -2.341862               | 0.800275  | -0.883431 |
| 3                | 6                | 0              | -0.592586               | -0.125482 | -0.129420 |
| 4                | 6                | 0              | 0.069405                | -1.337938 | 0.041312  |
| 5                | 6                | 0              | 0.206772                | 1.025236  | -0.201078 |
| 6                | 6                | 0              | 1.457510                | -1.418360 | 0.134779  |
| 7                | 1                | 0              | -0.509127               | -2.253136 | 0.101438  |
| 8                | 6                | 0              | 1.591632                | 0.955713  | -0.112739 |
| 9                | 6                | 0              | 2.238478                | -0.268973 | 0.058306  |
| 10               | 1                | 0              | 1.932446                | -2.385195 | 0.265989  |
| 11               | 1                | 0              | 2.172072                | 1.872640  | -0.177571 |
| 12               | 6                | 0              | -2.662454               | 0.374973  | 1.187586  |
| 13               | 1                | 0              | -3.745805               | 0.520762  | 1.137373  |
| 14               | 1                | 0              | -2.459451               | -0.418201 | 1.914935  |
| 15               | 1                | 0              | -2.211909               | 1.299350  | 1.558240  |
| 16               | 6                | 0              | -2.792749               | -1.274335 | -0.706938 |
| 17               | 1                | 0              | -3.861832               | -1.084203 | -0.836365 |
| 18               | 1                | 0              | -2.385078               | -1.589338 | -1.671685 |
| 19               | 1                | 0              | -2.691550               | -2.107796 | -0.005189 |
| 20               | 6                | 0              | 3.739662                | -0.325415 | 0.152259  |
| 21               | 1                | 0              | 4.204089                | 0.076145  | -0.753075 |
| 22               | 1                | 0              | 4.101925                | 0.270620  | 0.994897  |
| 23               | 1                | 0              | 4.087013                | -1.351663 | 0.286664  |
| 24               | 8                | 0              | -0.427916               | 2.231647  | -0.364852 |
| 25               | 1                | 0              | 0.226978                | 2.934565  | -0.422173 |

Rotational constants (GHZ):      2.0315235      0.7398440      0.5940136

#### Thymolate

Electronic Energy -464.230438

Stoichiometry C10H13O(1-)

Framework group C1[X(C10H13O)]

Deg. of freedom 66

Full point group C1 NOp 1

Largest Abelian subgroup C1 NOp 1

Largest concise Abelian subgroup C1 NOp 1

Standard orientation:

| Center<br>Number | Atomic<br>Number | Atomic<br>Type | Coordinates (Angstroms) |           |           |
|------------------|------------------|----------------|-------------------------|-----------|-----------|
|                  |                  |                | X                       | Y         | Z         |
| 1                | 6                | 0              | -2.088450               | -0.028244 | -0.218154 |
| 2                | 1                | 0              | -2.295055               | 0.718734  | -0.994536 |
| 3                | 6                | 0              | -0.580140               | -0.127172 | -0.131349 |
| 4                | 6                | 0              | 0.094628                | -1.319375 | 0.063536  |
| 5                | 6                | 0              | 0.155691                | 1.120017  | -0.230419 |
| 6                | 6                | 0              | 1.488834                | -1.390864 | 0.169535  |
| 7                | 1                | 0              | -0.472125               | -2.245955 | 0.138074  |
| 8                | 6                | 0              | 1.580544                | 0.997369  | -0.122445 |
| 9                | 6                | 0              | 2.231853                | -0.211371 | 0.070850  |
| 10               | 1                | 0              | 1.982824                | -2.346686 | 0.323521  |
| 11               | 1                | 0              | 2.152717                | 1.920573  | -0.195534 |
| 12               | 6                | 0              | -2.670018               | 0.532747  | 1.087818  |
| 13               | 1                | 0              | -3.753535               | 0.693614  | 1.006431  |
| 14               | 1                | 0              | -2.487062               | -0.163436 | 1.915526  |
| 15               | 1                | 0              | -2.190996               | 1.487118  | 1.315292  |
| 16               | 6                | 0              | -2.790259               | -1.331958 | -0.599539 |
| 17               | 1                | 0              | -3.862727               | -1.159525 | -0.748263 |
| 18               | 1                | 0              | -2.378180               | -1.751713 | -1.522603 |
| 19               | 1                | 0              | -2.688990               | -2.089613 | 0.186790  |
| 20               | 6                | 0              | 3.741995                | -0.259180 | 0.132124  |
| 21               | 1                | 0              | 4.174704                | -0.388658 | -0.867370 |
| 22               | 1                | 0              | 4.151345                | 0.666156  | 0.549020  |
| 23               | 1                | 0              | 4.088899                | -1.093853 | 0.750538  |
| 24               | 8                | 0              | -0.426237               | 2.232679  | -0.398578 |

Rotational constants (GHZ):      2.1009789      0.7457645      0.5964070

### - wB97XD 6-311G+dp/PCM

#### H<sub>2</sub>O

Electronic Energy -76.440343

Stoichiometry H2O

Framework group CS[SG(H2O)]

Deg. of freedom 3

Full point group CS NOp 2

Largest Abelian subgroup CS NOp 2

Largest concise Abelian subgroup C1 NOp 1

Standard orientation:

| Center<br>Number | Atomic<br>Number | Atomic<br>Type | Coordinates (Angstroms) |           |          |
|------------------|------------------|----------------|-------------------------|-----------|----------|
|                  |                  |                | X                       | Y         | Z        |
| 1                | 8                | 0              | 0.000000                | 0.115552  | 0.000000 |
| 2                | 1                | 0              | 0.768344                | -0.462208 | 0.000000 |
| 3                | 1                | 0              | -0.768344               | -0.462205 | 0.000000 |

Rotational constants (GHZ):      845.7772941      424.7084360      282.7334013

#### OH<sup>-</sup>

Electronic Energy -75.928811

Stoichiometry HO(1-)

Framework group C\*V[C\*(HO)]

Deg. of freedom 1

Full point group C\*V NOp 4

Largest Abelian subgroup C2V NOp 4  
 Largest concise Abelian subgroup C1 NOp 1  
 Standard orientation:

| Center<br>Number | Atomic<br>Number | Atomic<br>Type | Coordinates (Angstroms) |          |           |
|------------------|------------------|----------------|-------------------------|----------|-----------|
|                  |                  |                | X                       | Y        | Z         |
| 1                | 8                | 0              | 0.000000                | 0.000000 | 0.106682  |
| 2                | 1                | 0              | 0.000000                | 0.000000 | -0.853456 |

Rotational constants (GHZ): 0.0000000 578.2316725 578.2316725

### Phenol

Electronic Energy -307.453422  
 Stoichiometry C6H6O  
 Framework group C1[X(C6H6O)]  
 Deg. of freedom 33  
 Full point group C1 NOp 1  
 Largest Abelian subgroup C1 NOp 1  
 Largest concise Abelian subgroup C1 NOp 1  
 Standard orientation:

| Center<br>Number | Atomic<br>Number | Atomic<br>Type | Coordinates (Angstroms) |           |           |
|------------------|------------------|----------------|-------------------------|-----------|-----------|
|                  |                  |                | X                       | Y         | Z         |
| 1                | 6                | 0              | 1.166365                | -1.185110 | 0.000138  |
| 2                | 6                | 0              | -0.220317               | -1.218357 | 0.000067  |
| 3                | 6                | 0              | -0.937315               | -0.024576 | -0.000047 |
| 4                | 6                | 0              | -0.263434               | 1.194125  | -0.000090 |
| 5                | 6                | 0              | 1.126691                | 1.213840  | -0.000021 |
| 6                | 6                | 0              | 1.849484                | 0.027865  | 0.000094  |
| 7                | 1                | 0              | 1.719159                | -2.117999 | 0.000227  |
| 8                | 1                | 0              | -0.762921               | -2.156095 | 0.000099  |
| 9                | 1                | 0              | -0.823336               | 2.125277  | -0.000179 |
| 10               | 1                | 0              | 1.643936                | 2.166813  | -0.000056 |
| 11               | 1                | 0              | 2.932644                | 0.047041  | 0.000150  |
| 12               | 8                | 0              | -2.295224               | -0.110072 | -0.000109 |
| 13               | 1                | 0              | -2.676535               | 0.768815  | -0.000219 |

Rotational constants (GHZ): 5.6970930 2.6365260 1.8024023

### Phenolate

Electronic Energy -306.969889  
 Stoichiometry C6H5O(1-)  
 Framework group C1[X(C6H5O)]  
 Deg. of freedom 30  
 Full point group C1 NOp 1  
 Largest Abelian subgroup C1 NOp 1  
 Largest concise Abelian subgroup C1 NOp 1  
 Standard orientation:

| Center<br>Number | Atomic<br>Number | Atomic<br>Type | Coordinates (Angstroms) |           |           |
|------------------|------------------|----------------|-------------------------|-----------|-----------|
|                  |                  |                | X                       | Y         | Z         |
| 1                | 6                | 0              | -1.096527               | -1.196063 | 0.000004  |
| 2                | 6                | 0              | 0.287292                | -1.208230 | 0.000009  |
| 3                | 6                | 0              | 1.075469                | 0.000060  | -0.000011 |
| 4                | 6                | 0              | 0.287314                | 1.208277  | 0.000006  |
| 5                | 6                | 0              | -1.096562               | 1.196021  | 0.000009  |
| 6                | 6                | 0              | -1.822882               | -0.000008 | -0.000012 |
| 7                | 1                | 0              | -1.632640               | -2.144860 | 0.000012  |
| 8                | 1                | 0              | 0.830704                | -2.150205 | 0.000015  |
| 9                | 1                | 0              | 0.830590                | 2.150337  | 0.000004  |
| 10               | 1                | 0              | -1.632630               | 2.144832  | 0.000013  |
| 11               | 1                | 0              | -2.908351               | -0.000073 | -0.000040 |
| 12               | 8                | 0              | 2.338462                | -0.000047 | -0.000005 |

Rotational constants (GHZ): 5.7454342 2.7006297 1.8371031

### Thymol

Electronic Energy -464.710368  
 Stoichiometry C10H14O

Framework group C1[X(C10H14O)]  
 Deg. of freedom 69  
 Full point group C1 NOp 1  
 Largest Abelian subgroup C1 NOp 1  
 Largest concise Abelian subgroup C1 NOp 1  
 Standard orientation:

| Center<br>Number | Atomic<br>Number | Atomic<br>Type | Coordinates (Angstroms) |           |           |
|------------------|------------------|----------------|-------------------------|-----------|-----------|
|                  |                  |                | X                       | Y         | Z         |
| 1                | 6                | 0              | -2.102725               | -0.016373 | -0.189920 |
| 2                | 1                | 0              | -2.333888               | 0.792054  | -0.890455 |
| 3                | 6                | 0              | -0.590812               | -0.130265 | -0.127556 |
| 4                | 6                | 0              | 0.074656                | -1.339406 | 0.044846  |
| 5                | 6                | 0              | 0.203223                | 1.024471  | -0.202947 |
| 6                | 6                | 0              | 1.463020                | -1.415894 | 0.138008  |
| 7                | 1                | 0              | -0.500858               | -2.256293 | 0.105805  |
| 8                | 6                | 0              | 1.588691                | 0.957142  | -0.115561 |
| 9                | 6                | 0              | 2.239898                | -0.264936 | 0.058137  |
| 10               | 1                | 0              | 1.939713                | -2.381464 | 0.271039  |
| 11               | 1                | 0              | 2.171566                | 1.872489  | -0.183455 |
| 12               | 6                | 0              | -2.662395               | 0.387782  | 1.182133  |
| 13               | 1                | 0              | -3.745305               | 0.534637  | 1.129268  |
| 14               | 1                | 0              | -2.460764               | -0.395984 | 1.919698  |
| 15               | 1                | 0              | -2.208072               | 1.315935  | 1.536370  |
| 16               | 6                | 0              | -2.792626               | -1.282160 | -0.699928 |
| 17               | 1                | 0              | -3.860167               | -1.091137 | -0.837743 |
| 18               | 1                | 0              | -2.378739               | -1.608134 | -1.657957 |
| 19               | 1                | 0              | -2.699839               | -2.109051 | 0.010848  |
| 20               | 6                | 0              | 3.742761                | -0.315961 | 0.151255  |
| 21               | 1                | 0              | 4.205612                | 0.083417  | -0.755551 |
| 22               | 1                | 0              | 4.103987                | 0.282925  | 0.991997  |
| 23               | 1                | 0              | 4.094486                | -1.340031 | 0.288575  |
| 24               | 8                | 0              | -0.439174               | 2.218060  | -0.367857 |
| 25               | 1                | 0              | 0.203521                | 2.929763  | -0.416391 |

Rotational constants (GHZ): 2.0395055 0.7396510 0.5941310

### Thymolate

Electronic Energy -464.223394  
 Stoichiometry C10H13O(1-)  
 Framework group C1[X(C10H13O)]  
 Deg. of freedom 66  
 Full point group C1 NOp 1  
 Largest Abelian subgroup C1 NOp 1  
 Largest concise Abelian subgroup C1 NOp 1  
 Standard orientation:

| Center<br>Number | Atomic<br>Number | Atomic<br>Type | Coordinates (Angstroms) |           |           |
|------------------|------------------|----------------|-------------------------|-----------|-----------|
|                  |                  |                | X                       | Y         | Z         |
| 1                | 6                | 0              | -2.088450               | -0.028244 | -0.218154 |
| 2                | 1                | 0              | -2.295055               | 0.718734  | -0.994536 |
| 3                | 6                | 0              | -0.580140               | -0.127172 | -0.131349 |
| 4                | 6                | 0              | 0.094628                | -1.319375 | 0.063536  |
| 5                | 6                | 0              | 0.155691                | 1.120017  | -0.230419 |
| 6                | 6                | 0              | 1.488834                | -1.390864 | 0.169535  |
| 7                | 1                | 0              | -0.472125               | -2.245955 | 0.138074  |
| 8                | 6                | 0              | 1.580544                | 0.997369  | -0.122445 |
| 9                | 6                | 0              | 2.231853                | -0.211371 | 0.070850  |
| 10               | 1                | 0              | 1.982824                | -2.346686 | 0.323521  |
| 11               | 1                | 0              | 2.152717                | 1.920573  | -0.195534 |
| 12               | 6                | 0              | -2.670018               | 0.532747  | 1.087818  |
| 13               | 1                | 0              | -3.753535               | 0.693614  | 1.006431  |
| 14               | 1                | 0              | -2.487062               | -0.163436 | 1.915526  |
| 15               | 1                | 0              | -2.190996               | 1.487118  | 1.315292  |
| 16               | 6                | 0              | -2.790259               | -1.331958 | -0.599539 |
| 17               | 1                | 0              | -3.862727               | -1.159525 | -0.748263 |
| 18               | 1                | 0              | -2.378180               | -1.751713 | -1.522603 |
| 19               | 1                | 0              | -2.688990               | -2.089613 | 0.186790  |
| 20               | 6                | 0              | 3.741995                | -0.259180 | 0.132124  |



|    |   |   |           |           |           |
|----|---|---|-----------|-----------|-----------|
| 21 | 1 | 0 | 4.174704  | -0.388658 | -0.867370 |
| 22 | 1 | 0 | 4.151345  | 0.666156  | 0.549020  |
| 23 | 1 | 0 | 4.088899  | -1.093853 | 0.750538  |
| 24 | 8 | 0 | -0.426237 | 2.232679  | -0.398578 |

Rotational constants (GHZ): 2.1009789 0.7457645 0.5964070

## - wB97XD 6-311G+dp/CPCM

### H<sub>2</sub>O

Electronic Energy -76.440394

Stoichiometry H<sub>2</sub>O

Framework group CS[SG(H<sub>2</sub>O)]

Deg. of freedom 3

Full point group CS NOp 2

Largest Abelian subgroup CS NOp 2

Largest concise Abelian subgroup C1 NOp 1

Standard orientation:

| Center<br>Number | Atomic<br>Number | Atomic<br>Type | Coordinates (Angstroms) |           |          |
|------------------|------------------|----------------|-------------------------|-----------|----------|
|                  |                  |                | X                       | Y         | Z        |
| 1                | 8                | 0              | 0.000000                | 0.115552  | 0.000000 |
| 2                | 1                | 0              | 0.768344                | -0.462208 | 0.000000 |
| 3                | 1                | 0              | -0.768344               | -0.462205 | 0.000000 |

Rotational constants (GHZ): 845.7772941 424.7084360 282.7334013

### OH

Electronic Energy -75.928866

Stoichiometry HO(1-)

Framework group C\*[C\*(HO)]

Deg. of freedom 1

Full point group C\*V NOp 4

Largest Abelian subgroup C2V NOp 4

Largest concise Abelian subgroup C1 NOp 1

Standard orientation:

| Center<br>Number | Atomic<br>Number | Atomic<br>Type | Coordinates (Angstroms) |          |           |
|------------------|------------------|----------------|-------------------------|----------|-----------|
|                  |                  |                | X                       | Y        | Z         |
| 1                | 8                | 0              | 0.000000                | 0.000000 | 0.106682  |
| 2                | 1                | 0              | 0.000000                | 0.000000 | -0.853456 |

Rotational constants (GHZ): 0.0000000 578.2316725 578.2316725

### Phenol

Electronic Energy -307.453490

Stoichiometry C<sub>6</sub>H<sub>6</sub>O

Framework group C1[X(C<sub>6</sub>H<sub>6</sub>O)]

Deg. of freedom 33

Full point group C1 NOp 1

Largest Abelian subgroup C1 NOp 1

Largest concise Abelian subgroup C1 NOp 1

Standard orientation:

| Center<br>Number | Atomic<br>Number | Atomic<br>Type | Coordinates (Angstroms) |           |           |
|------------------|------------------|----------------|-------------------------|-----------|-----------|
|                  |                  |                | X                       | Y         | Z         |
| 1                | 6                | 0              | 1.171139                | -1.184735 | 0.000139  |
| 2                | 6                | 0              | -0.217023               | -1.220032 | 0.000067  |
| 3                | 6                | 0              | -0.937342               | -0.026375 | -0.000049 |
| 4                | 6                | 0              | -0.267572               | 1.195306  | -0.000092 |
| 5                | 6                | 0              | 1.123568                | 1.216774  | -0.000020 |
| 6                | 6                | 0              | 1.850798                | 0.031227  | 0.000096  |
| 7                | 1                | 0              | 1.726025                | -2.116478 | 0.000230  |
| 8                | 1                | 0              | -0.754361               | -2.161488 | 0.000099  |
| 9                | 1                | 0              | -0.830092               | 2.123794  | -0.000181 |
| 10               | 1                | 0              | 1.637803                | 2.171349  | -0.000055 |
| 11               | 1                | 0              | 2.934097                | 0.052986  | 0.000153  |

|    |   |   |           |           |           |
|----|---|---|-----------|-----------|-----------|
| 12 | 8 | 0 | -2.296200 | -0.113491 | -0.000111 |
| 13 | 1 | 0 | -2.685280 | 0.764770  | -0.000210 |

---

Rotational constants (GHZ):      5.6844468      2.6331193      1.7995440

#### Phenolate

Electronic Energy -306.970004  
 Stoichiometry C<sub>6</sub>H<sub>5</sub>O(1-)  
 Framework group C1[X(C<sub>6</sub>H<sub>5</sub>O)]  
 Deg. of freedom 30  
 Full point group C1 NOp 1  
 Largest Abelian subgroup C1 NOp 1  
 Largest concise Abelian subgroup C1 NOp 1  
 Standard orientation:

---

| Center<br>Number | Atomic<br>Number | Atomic<br>Type | Coordinates (Angstroms) |   |   |
|------------------|------------------|----------------|-------------------------|---|---|
|                  |                  |                | X                       | Y | Z |

---

|    |   |   |           |           |           |
|----|---|---|-----------|-----------|-----------|
| 1  | 6 | 0 | -1.096527 | -1.196063 | 0.000004  |
| 2  | 6 | 0 | 0.287292  | -1.208230 | 0.000009  |
| 3  | 6 | 0 | 1.075469  | 0.000060  | -0.000011 |
| 4  | 6 | 0 | 0.287314  | 1.208277  | 0.000006  |
| 5  | 6 | 0 | -1.096562 | 1.196021  | 0.000009  |
| 6  | 6 | 0 | -1.822882 | -0.000008 | -0.000012 |
| 7  | 1 | 0 | -1.632640 | -2.144860 | 0.000012  |
| 8  | 1 | 0 | 0.830704  | -2.150205 | 0.000015  |
| 9  | 1 | 0 | 0.830590  | 2.150337  | 0.000004  |
| 10 | 1 | 0 | -1.632630 | 2.144832  | 0.000013  |
| 11 | 1 | 0 | -2.908351 | -0.000073 | -0.000040 |
| 12 | 8 | 0 | 2.338462  | -0.000047 | -0.000005 |

---

Rotational constants (GHZ):      5.7454342      2.7006297      1.8371031

#### Thymol

Electronic Energy -464.710436  
 Stoichiometry C<sub>10</sub>H<sub>14</sub>O  
 Framework group C1[X(C<sub>10</sub>H<sub>14</sub>O)]  
 Deg. of freedom 69  
 Full point group C1 NOp 1  
 Largest Abelian subgroup C1 NOp 1  
 Largest concise Abelian subgroup C1 NOp 1  
 Standard orientation:

---

| Center<br>Number | Atomic<br>Number | Atomic<br>Type | Coordinates (Angstroms) |   |   |
|------------------|------------------|----------------|-------------------------|---|---|
|                  |                  |                | X                       | Y | Z |

---

|    |   |   |           |           |           |
|----|---|---|-----------|-----------|-----------|
| 1  | 6 | 0 | -2.102786 | -0.015829 | -0.189468 |
| 2  | 1 | 0 | -2.334056 | 0.793880  | -0.888471 |
| 3  | 6 | 0 | -0.590867 | -0.129875 | -0.127452 |
| 4  | 6 | 0 | 0.074357  | -1.339194 | 0.044821  |
| 5  | 6 | 0 | 0.203394  | 1.024724  | -0.202801 |
| 6  | 6 | 0 | 1.462716  | -1.415987 | 0.137872  |
| 7  | 1 | 0 | -0.501365 | -2.255952 | 0.105814  |
| 8  | 6 | 0 | 1.588882  | 0.957095  | -0.115513 |
| 9  | 6 | 0 | 2.239830  | -0.265148 | 0.058057  |
| 10 | 1 | 0 | 1.939207  | -2.381671 | 0.270802  |
| 11 | 1 | 0 | 2.171945  | 1.872317  | -0.183350 |
| 12 | 6 | 0 | -2.662304 | 0.385699  | 1.183427  |
| 13 | 1 | 0 | -3.745206 | 0.532723  | 1.130955  |
| 14 | 1 | 0 | -2.460678 | -0.399546 | 1.919423  |
| 15 | 1 | 0 | -2.207915 | 1.313116  | 1.539548  |
| 16 | 6 | 0 | -2.792724 | -1.280685 | -0.701773 |
| 17 | 1 | 0 | -3.860275 | -1.089399 | -0.839138 |
| 18 | 1 | 0 | -2.378908 | -1.604843 | -1.660450 |
| 19 | 1 | 0 | -2.699849 | -2.108911 | 0.007422  |
| 20 | 6 | 0 | 3.742694  | -0.316484 | 0.151084  |
| 21 | 1 | 0 | 4.205555  | 0.082814  | -0.755751 |
| 22 | 1 | 0 | 4.104083  | 0.282413  | 0.991744  |
| 23 | 1 | 0 | 4.094215  | -1.340618 | 0.288426  |
| 24 | 8 | 0 | -0.438745 | 2.218461  | -0.367576 |
| 25 | 1 | 0 | 0.204054  | 2.930098  | -0.415893 |

---

Rotational constants (GHZ): 2.0392503 0.7395820 0.5941750

### Thymolate

Electronic Energy -464.223575

Stoichiometry C10H13O(1-)

Framework group C1[X(C10H13O)]

Deg. of freedom 66

Full point group C1 NOp 1

Largest Abelian subgroup C1 NOp 1

Largest concise Abelian subgroup C1 NOp 1

Standard orientation:

| Center<br>Number | Atomic<br>Number | Atomic<br>Type | Coordinates (Angstroms) |           |           |
|------------------|------------------|----------------|-------------------------|-----------|-----------|
|                  |                  |                | X                       | Y         | Z         |
| 1                | 6                | 0              | -2.088450               | -0.028244 | -0.218154 |
| 2                | 1                | 0              | -2.295055               | 0.718734  | -0.994536 |
| 3                | 6                | 0              | -0.580140               | -0.127172 | -0.131349 |
| 4                | 6                | 0              | 0.094628                | -1.319375 | 0.063536  |
| 5                | 6                | 0              | 0.155691                | 1.120017  | -0.230419 |
| 6                | 6                | 0              | 1.488834                | -1.390864 | 0.169535  |
| 7                | 1                | 0              | -0.472125               | -2.245955 | 0.138074  |
| 8                | 6                | 0              | 1.580544                | 0.997369  | -0.122445 |
| 9                | 6                | 0              | 2.231853                | -0.211371 | 0.070850  |
| 10               | 1                | 0              | 1.982824                | -2.346686 | 0.323521  |
| 11               | 1                | 0              | 2.152717                | 1.920573  | -0.195534 |
| 12               | 6                | 0              | -2.670018               | 0.532747  | 1.087818  |
| 13               | 1                | 0              | -3.753535               | 0.693614  | 1.006431  |
| 14               | 1                | 0              | -2.487062               | -0.163436 | 1.915526  |
| 15               | 1                | 0              | -2.190996               | 1.487118  | 1.315292  |
| 16               | 6                | 0              | -2.790259               | -1.331958 | -0.599539 |
| 17               | 1                | 0              | -3.862727               | -1.159525 | -0.748263 |
| 18               | 1                | 0              | -2.378180               | -1.751713 | -1.522603 |
| 19               | 1                | 0              | -2.688990               | -2.089613 | 0.186790  |
| 20               | 6                | 0              | 3.741995                | -0.259180 | 0.132124  |
| 21               | 1                | 0              | 4.174704                | -0.388658 | -0.867370 |
| 22               | 1                | 0              | 4.151345                | 0.666156  | 0.549020  |
| 23               | 1                | 0              | 4.088899                | -1.093853 | 0.750538  |
| 24               | 8                | 0              | -0.426237               | 2.232679  | -0.398578 |

Rotational constants (GHZ): 2.1009789 0.7457645 0.5964070

## - CAM-B3LYP 6-311G+dp/SMD

### H<sub>2</sub>O

Electronic Energy -76.444219

Stoichiometry H2O

Framework group CS[SG(H2O)]

Deg. of freedom 3

Full point group CS NOp 2

Largest Abelian subgroup CS NOp 2

Largest concise Abelian subgroup C1 NOp 1

Standard orientation:

| Center<br>Number | Atomic<br>Number | Atomic<br>Type | Coordinates (Angstroms) |           |          |
|------------------|------------------|----------------|-------------------------|-----------|----------|
|                  |                  |                | X                       | Y         | Z        |
| 1                | 8                | 0              | 0.000000                | 0.115552  | 0.000000 |
| 2                | 1                | 0              | 0.768344                | -0.462208 | 0.000000 |
| 3                | 1                | 0              | -0.768344               | -0.462205 | 0.000000 |

Rotational constants (GHZ): 845.7772941 424.7084360 282.7334013

### OH<sup>-</sup>

Electronic Energy -75.952738

Stoichiometry HO(1-)

Framework group C\*[C\*(HO)]

Deg. of freedom 1

Full point group C<sub>2v</sub> NOp 4  
 Largest Abelian subgroup C<sub>2v</sub> NOp 4  
 Largest concise Abelian subgroup C<sub>1</sub> NOp 1  
 Standard orientation:

| Center<br>Number | Atomic<br>Number | Atomic<br>Type | Coordinates (Angstroms) |          |           |
|------------------|------------------|----------------|-------------------------|----------|-----------|
|                  |                  |                | X                       | Y        | Z         |
| 1                | 8                | 0              | 0.000000                | 0.000000 | 0.106682  |
| 2                | 1                | 0              | 0.000000                | 0.000000 | -0.853456 |

Rotational constants (GHZ): 0.0000000 578.2316725 578.2316725

### Phenol

Electronic Energy -307.405415  
 Stoichiometry C<sub>6</sub>H<sub>6</sub>O  
 Framework group C<sub>1</sub>[X(C<sub>6</sub>H<sub>6</sub>O)]  
 Deg. of freedom 33  
 Full point group C<sub>1</sub> NOp 1  
 Largest Abelian subgroup C<sub>1</sub> NOp 1  
 Largest concise Abelian subgroup C<sub>1</sub> NOp 1  
 Standard orientation:

| Center<br>Number | Atomic<br>Number | Atomic<br>Type | Coordinates (Angstroms) |           |           |
|------------------|------------------|----------------|-------------------------|-----------|-----------|
|                  |                  |                | X                       | Y         | Z         |
| 1                | 6                | 0              | 1.174028                | -1.181615 | 0.000141  |
| 2                | 6                | 0              | -0.212885               | -1.220510 | 0.000066  |
| 3                | 6                | 0              | -0.929440               | -0.029669 | -0.000050 |
| 4                | 6                | 0              | -0.268651               | 1.192815  | -0.000093 |
| 5                | 6                | 0              | 1.120360                | 1.217716  | -0.000018 |
| 6                | 6                | 0              | 1.848803                | 0.034670  | 0.000098  |
| 7                | 1                | 0              | 1.731002                | -2.111206 | 0.000231  |
| 8                | 1                | 0              | -0.747446               | -2.162822 | 0.000099  |
| 9                | 1                | 0              | -0.843187               | 2.112738  | -0.000184 |
| 10               | 1                | 0              | 1.633350                | 2.172262  | -0.000053 |
| 11               | 1                | 0              | 2.931507                | 0.059120  | 0.000156  |
| 12               | 8                | 0              | -2.301431               | -0.115083 | -0.000114 |
| 13               | 1                | 0              | -2.687068               | 0.770121  | -0.000199 |

Rotational constants (GHZ): 5.6947073 2.6316085 1.7998645

### Phenolate

Electronic Energy -306.931240  
 Stoichiometry C<sub>6</sub>H<sub>5</sub>O(1-)  
 Framework group C<sub>1</sub>[X(C<sub>6</sub>H<sub>5</sub>O)]  
 Deg. of freedom 30  
 Full point group C<sub>1</sub> NOp 1  
 Largest Abelian subgroup C<sub>1</sub> NOp 1  
 Largest concise Abelian subgroup C<sub>1</sub> NOp 1  
 Standard orientation:

| Center<br>Number | Atomic<br>Number | Atomic<br>Type | Coordinates (Angstroms) |           |           |
|------------------|------------------|----------------|-------------------------|-----------|-----------|
|                  |                  |                | X                       | Y         | Z         |
| 1                | 6                | 0              | 1.094882                | -1.194362 | -0.000004 |
| 2                | 6                | 0              | -0.286655               | -1.206551 | -0.000027 |
| 3                | 6                | 0              | -1.072024               | 0.000030  | 0.000007  |
| 4                | 6                | 0              | -0.286757               | 1.206578  | -0.000011 |
| 5                | 6                | 0              | 1.094832                | 1.194355  | -0.000027 |
| 6                | 6                | 0              | 1.820539                | 0.000032  | 0.000027  |
| 7                | 1                | 0              | 1.630268                | -2.142343 | 0.000006  |
| 8                | 1                | 0              | -0.831695               | -2.146101 | -0.000033 |
| 9                | 1                | 0              | -0.831723               | 2.146187  | 0.000004  |
| 10               | 1                | 0              | 1.630109                | 2.142382  | -0.000011 |
| 11               | 1                | 0              | 2.904951                | -0.000001 | 0.000085  |
| 12               | 8                | 0              | -2.336352               | -0.000077 | 0.000020  |

Rotational constants (GHZ): 5.7619198 2.7075373 1.8419850

**Thymol**

Electronic Energy -464.604855

Stoichiometry C<sub>10</sub>H<sub>14</sub>OFramework group C1[X(C<sub>10</sub>H<sub>14</sub>O)]

Deg. of freedom 69

Full point group C<sub>1</sub> NOp 1Largest Abelian subgroup C<sub>1</sub> NOp 1Largest concise Abelian subgroup C<sub>1</sub> NOp 1

Standard orientation:

| Center<br>Number | Atomic<br>Number | Atomic<br>Type | Coordinates (Angstroms) |           |           |
|------------------|------------------|----------------|-------------------------|-----------|-----------|
|                  |                  |                | X                       | Y         | Z         |
| 1                | 6                | 0              | -2.097266               | -0.033915 | -0.199878 |
| 2                | 1                | 0              | -2.317402               | 0.740233  | -0.940400 |
| 3                | 6                | 0              | -0.586793               | -0.144617 | -0.122883 |
| 4                | 6                | 0              | 0.088737                | -1.344260 | 0.050100  |
| 5                | 6                | 0              | 0.197855                | 1.011909  | -0.202754 |
| 6                | 6                | 0              | 1.475713                | -1.407747 | 0.142432  |
| 7                | 1                | 0              | -0.477680               | -2.265177 | 0.110220  |
| 8                | 6                | 0              | 1.579725                | 0.958579  | -0.115796 |
| 9                | 6                | 0              | 2.242134                | -0.254556 | 0.059736  |
| 10               | 1                | 0              | 1.960644                | -2.367847 | 0.276269  |
| 11               | 1                | 0              | 2.152878                | 1.879909  | -0.186558 |
| 12               | 6                | 0              | -2.672631               | 0.441741  | 1.140880  |
| 13               | 1                | 0              | -3.754599               | 0.580559  | 1.068518  |
| 14               | 1                | 0              | -2.477453               | -0.295211 | 1.924893  |
| 15               | 1                | 0              | -2.228464               | 1.390310  | 1.444522  |
| 16               | 6                | 0              | -2.783249               | -1.320994 | -0.653599 |
| 17               | 1                | 0              | -3.850579               | -1.141236 | -0.800172 |
| 18               | 1                | 0              | -2.370600               | -1.688812 | -1.595534 |
| 19               | 1                | 0              | -2.690194               | -2.115571 | 0.091447  |
| 20               | 6                | 0              | 3.743862                | -0.295176 | 0.152079  |
| 21               | 1                | 0              | 4.207153                | 0.103104  | -0.754176 |
| 22               | 1                | 0              | 4.104879                | 0.301743  | 0.993438  |
| 23               | 1                | 0              | 4.101507                | -1.316162 | 0.289057  |
| 24               | 8                | 0              | -0.458457               | 2.201434  | -0.372728 |
| 25               | 1                | 0              | 0.179036                | 2.916899  | -0.441607 |

Rotational constants (GHZ):      2.0552348      0.7417849      0.5935965

**Thymolate**

Electronic Energy -464.128329

Stoichiometry C<sub>10</sub>H<sub>13</sub>O(1-)Framework group C1[X(C<sub>10</sub>H<sub>13</sub>O)]

Deg. of freedom 66

Full point group C<sub>1</sub> NOp 1Largest Abelian subgroup C<sub>1</sub> NOp 1Largest concise Abelian subgroup C<sub>1</sub> NOp 1

Standard orientation:

| Center<br>Number | Atomic<br>Number | Atomic<br>Type | Coordinates (Angstroms) |           |           |
|------------------|------------------|----------------|-------------------------|-----------|-----------|
|                  |                  |                | X                       | Y         | Z         |
| 1                | 6                | 0              | -2.085488               | -0.034325 | -0.220176 |
| 2                | 1                | 0              | -2.286260               | 0.700279  | -1.008192 |
| 3                | 6                | 0              | -0.578375               | -0.132365 | -0.126126 |
| 4                | 6                | 0              | 0.099893                | -1.320371 | 0.067256  |
| 5                | 6                | 0              | 0.155059                | 1.113030  | -0.228058 |
| 6                | 6                | 0              | 1.493277                | -1.387660 | 0.171473  |
| 7                | 1                | 0              | -0.462922               | -2.247590 | 0.142234  |
| 8                | 6                | 0              | 1.577922                | 0.996592  | -0.122168 |
| 9                | 6                | 0              | 2.232555                | -0.208042 | 0.070542  |
| 10               | 1                | 0              | 1.989369                | -2.341008 | 0.325584  |
| 11               | 1                | 0              | 2.144182                | 1.921641  | -0.197626 |
| 12               | 6                | 0              | -2.676829               | 0.549692  | 1.069876  |
| 13               | 1                | 0              | -3.757133               | 0.716109  | 0.973575  |
| 14               | 1                | 0              | -2.510130               | -0.132092 | 1.911183  |
| 15               | 1                | 0              | -2.195806               | 1.503849  | 1.286599  |
| 16               | 6                | 0              | -2.786765               | -1.341406 | -0.585991 |
| 17               | 1                | 0              | -3.858960               | -1.171641 | -0.731008 |
| 18               | 1                | 0              | -2.381292               | -1.769178 | -1.506874 |

|    |   |   |           |           |           |
|----|---|---|-----------|-----------|-----------|
| 19 | 1 | 0 | -2.681341 | -2.092084 | 0.204262  |
| 20 | 6 | 0 | 3.741612  | -0.251093 | 0.130105  |
| 21 | 1 | 0 | 4.176051  | -0.368740 | -0.868991 |
| 22 | 1 | 0 | 4.147835  | 0.670297  | 0.555490  |
| 23 | 1 | 0 | 4.091598  | -1.089622 | 0.739197  |
| 24 | 8 | 0 | -0.431545 | 2.224433  | -0.398229 |

Rotational constants (GHZ): 2.1110515 0.7464748 0.5964394

## - CAM-B3LYP 6-311G+dp/PCM

### H<sub>2</sub>O

Electronic Energy -76.438457

Stoichiometry H<sub>2</sub>O

Framework group CS[SG(H<sub>2</sub>O)]

Deg. of freedom 3

Full point group CS NOp 2

Largest Abelian subgroup CS NOp 2

Largest concise Abelian subgroup C1 NOp 1

Standard orientation:

| Center<br>Number | Atomic<br>Number | Atomic<br>Type | Coordinates (Angstroms) |           |          |
|------------------|------------------|----------------|-------------------------|-----------|----------|
|                  |                  |                | X                       | Y         | Z        |
| 1                | 8                | 0              | 0.000000                | 0.115552  | 0.000000 |
| 2                | 1                | 0              | 0.768344                | -0.462208 | 0.000000 |
| 3                | 1                | 0              | -0.768344               | -0.462205 | 0.000000 |

Rotational constants (GHZ): 845.7772941 424.7084360 282.7334013

### OH

Electronic Energy -75.952738

Stoichiometry HO(1-)

Framework group C\*V[C\*(HO)]

Deg. of freedom 1

Full point group C\*V NOp 4

Largest Abelian subgroup C2V NOp 4

Largest concise Abelian subgroup C1 NOp 1

Standard orientation:

| Center<br>Number | Atomic<br>Number | Atomic<br>Type | Coordinates (Angstroms) |          |           |
|------------------|------------------|----------------|-------------------------|----------|-----------|
|                  |                  |                | X                       | Y        | Z         |
| 1                | 8                | 0              | 0.000000                | 0.000000 | 0.106682  |
| 2                | 1                | 0              | 0.000000                | 0.000000 | -0.853456 |

Rotational constants (GHZ): 0.0000000 578.2316725 578.2316725

### Phenol

Electronic Energy -307.402499

Stoichiometry C<sub>6</sub>H<sub>6</sub>O

Framework group C1[X(C<sub>6</sub>H<sub>6</sub>O)]

Deg. of freedom 33

Full point group C1 NOp 1

Largest Abelian subgroup C1 NOp 1

Largest concise Abelian subgroup C1 NOp 1

Standard orientation:

| Center<br>Number | Atomic<br>Number | Atomic<br>Type | Coordinates (Angstroms) |           |           |
|------------------|------------------|----------------|-------------------------|-----------|-----------|
|                  |                  |                | X                       | Y         | Z         |
| 1                | 6                | 0              | 1.170045                | -1.182949 | 0.000139  |
| 2                | 6                | 0              | -0.216361               | -1.218393 | 0.000067  |
| 3                | 6                | 0              | -0.933741               | -0.026748 | -0.000049 |
| 4                | 6                | 0              | -0.266744               | 1.193145  | -0.000092 |
| 5                | 6                | 0              | 1.122501                | 1.215255  | -0.000020 |
| 6                | 6                | 0              | 1.848549                | 0.031457  | 0.000097  |
| 7                | 1                | 0              | 1.724690                | -2.113821 | 0.000230  |
| 8                | 1                | 0              | -0.753954               | -2.158736 | 0.000099  |

|    |   |   |           |           |           |
|----|---|---|-----------|-----------|-----------|
| 9  | 1 | 0 | -0.830906 | 2.119516  | -0.000181 |
| 10 | 1 | 0 | 1.636618  | 2.169023  | -0.000054 |
| 11 | 1 | 0 | 2.931067  | 0.053482  | 0.000154  |
| 12 | 8 | 0 | -2.295778 | -0.113390 | -0.000113 |
| 13 | 1 | 0 | -2.686782 | 0.767057  | -0.000206 |

Rotational constants (GHZ):        5.7006956        2.6371994        1.8030775

**Phenolate**

Electronic Energy -306.923585  
 Stoichiometry C6H5O(1-)  
 Framework group C1[X(C6H5O)]  
 Deg. of freedom 30  
 Full point group C1 NOP 1  
 Largest Abelian subgroup C1 NOP 1  
 Largest concise Abelian subgroup C1 NOP 1  
 Standard orientation:

| Center<br>Number | Atomic<br>Number | Atomic<br>Type | Coordinates (Angstroms) |           |           |
|------------------|------------------|----------------|-------------------------|-----------|-----------|
|                  |                  |                | X                       | Y         | Z         |
| 1                | 6                | 0              | 1.094882                | -1.194362 | -0.000004 |
| 2                | 6                | 0              | -0.286655               | -1.206551 | -0.000027 |
| 3                | 6                | 0              | -1.072024               | 0.000030  | 0.000007  |
| 4                | 6                | 0              | -0.286757               | 1.206578  | -0.000011 |
| 5                | 6                | 0              | 1.094832                | 1.194355  | -0.000027 |
| 6                | 6                | 0              | 1.820539                | 0.000032  | 0.000027  |
| 7                | 1                | 0              | 1.630268                | -2.142343 | 0.000006  |
| 8                | 1                | 0              | -0.831695               | -2.146101 | -0.000033 |
| 9                | 1                | 0              | -0.831723               | 2.146187  | 0.000004  |
| 10               | 1                | 0              | 1.630109                | 2.142382  | -0.000011 |
| 11               | 1                | 0              | 2.904951                | -0.000001 | 0.000085  |
| 12               | 8                | 0              | -2.336352               | -0.000077 | 0.000020  |

Rotational constants (GHZ):        5.7619198        2.7075373        1.8419850

**Thymol**

Electronic Energy -464.604170  
 Stoichiometry C10H14O  
 Framework group C1[X(C10H14O)]  
 Deg. of freedom 69  
 Full point group C1 NOP 1  
 Largest Abelian subgroup C1 NOP 1  
 Largest concise Abelian subgroup C1 NOP 1  
 Standard orientation:

| Center<br>Number | Atomic<br>Number | Atomic<br>Type | Coordinates (Angstroms) |           |           |
|------------------|------------------|----------------|-------------------------|-----------|-----------|
|                  |                  |                | X                       | Y         | Z         |
| 1                | 6                | 0              | -2.097266               | -0.033915 | -0.199878 |
| 2                | 1                | 0              | -2.317402               | 0.740233  | -0.940400 |
| 3                | 6                | 0              | -0.586793               | -0.144617 | -0.122883 |
| 4                | 6                | 0              | 0.088737                | -1.344260 | 0.050100  |
| 5                | 6                | 0              | 0.197855                | 1.011909  | -0.202754 |
| 6                | 6                | 0              | 1.475713                | -1.407747 | 0.142432  |
| 7                | 1                | 0              | -0.477680               | -2.265177 | 0.110220  |
| 8                | 6                | 0              | 1.579725                | 0.958579  | -0.115796 |
| 9                | 6                | 0              | 2.242134                | -0.254556 | 0.059736  |
| 10               | 1                | 0              | 1.960644                | -2.367847 | 0.276269  |
| 11               | 1                | 0              | 2.152878                | 1.879909  | -0.186558 |
| 12               | 6                | 0              | -2.672631               | 0.441741  | 1.140880  |
| 13               | 1                | 0              | -3.754599               | 0.580559  | 1.068518  |
| 14               | 1                | 0              | -2.477453               | -0.295211 | 1.924893  |
| 15               | 1                | 0              | -2.228464               | 1.390310  | 1.444522  |
| 16               | 6                | 0              | -2.783249               | -1.320994 | -0.653599 |
| 17               | 1                | 0              | -3.850579               | -1.141236 | -0.800172 |
| 18               | 1                | 0              | -2.370600               | -1.688812 | -1.595534 |
| 19               | 1                | 0              | -2.690194               | -2.115571 | 0.091447  |
| 20               | 6                | 0              | 3.743862                | -0.295176 | 0.152079  |
| 21               | 1                | 0              | 4.207153                | 0.103104  | -0.754176 |
| 22               | 1                | 0              | 4.104879                | 0.301743  | 0.993438  |

|    |   |   |           |           |           |
|----|---|---|-----------|-----------|-----------|
| 23 | 1 | 0 | 4.101507  | -1.316162 | 0.289057  |
| 24 | 8 | 0 | -0.458457 | 2.201434  | -0.372728 |
| 25 | 1 | 0 | 0.179036  | 2.916899  | -0.441607 |

Rotational constants (GHZ): 2.0552348 0.7417849 0.5935965

### Thymolate

Electronic Energy -464.121695

Stoichiometry C10H13O(1-)

Framework group C1[X(C10H13O)]

Deg. of freedom 66

Full point group C1 NOp 1

Largest Abelian subgroup C1 NOp 1

Largest concise Abelian subgroup C1 NOp 1

Standard orientation:

| Center<br>Number | Atomic<br>Number | Atomic<br>Type | Coordinates (Angstroms) |           |           |
|------------------|------------------|----------------|-------------------------|-----------|-----------|
|                  |                  |                | X                       | Y         | Z         |
| 1                | 6                | 0              | -2.085488               | -0.034325 | -0.220176 |
| 2                | 1                | 0              | -2.286260               | 0.700279  | -1.008192 |
| 3                | 6                | 0              | -0.578375               | -0.132365 | -0.126126 |
| 4                | 6                | 0              | 0.099893                | -1.320371 | 0.067256  |
| 5                | 6                | 0              | 0.155059                | 1.113030  | -0.228058 |
| 6                | 6                | 0              | 1.493277                | -1.387660 | 0.171473  |
| 7                | 1                | 0              | -0.462922               | -2.247590 | 0.142234  |
| 8                | 6                | 0              | 1.577922                | 0.996592  | -0.122168 |
| 9                | 6                | 0              | 2.232555                | -0.208042 | 0.070542  |
| 10               | 1                | 0              | 1.989369                | -2.341008 | 0.325584  |
| 11               | 1                | 0              | 2.144182                | 1.921641  | -0.197626 |
| 12               | 6                | 0              | -2.676829               | 0.549692  | 1.069876  |
| 13               | 1                | 0              | -3.757133               | 0.716109  | 0.973575  |
| 14               | 1                | 0              | -2.510130               | -0.132092 | 1.911183  |
| 15               | 1                | 0              | -2.195806               | 1.503849  | 1.286599  |
| 16               | 6                | 0              | -2.786765               | -1.341406 | -0.585991 |
| 17               | 1                | 0              | -3.858960               | -1.171641 | -0.731008 |
| 18               | 1                | 0              | -2.381292               | -1.769178 | -1.506874 |
| 19               | 1                | 0              | -2.681341               | -2.092084 | 0.204262  |
| 20               | 6                | 0              | 3.741612                | -0.251093 | 0.130105  |
| 21               | 1                | 0              | 4.176051                | -0.368740 | -0.868991 |
| 22               | 1                | 0              | 4.147835                | 0.670297  | 0.555490  |
| 23               | 1                | 0              | 4.091598                | -1.089622 | 0.739197  |
| 24               | 8                | 0              | -0.431545               | 2.224433  | -0.398229 |

Rotational constants (GHZ): 2.1110515 0.7464748 0.5964394

## - CAM-B3LYP 6-311G+dp/CPCM

### H<sub>2</sub>O

Electronic Energy -76.438457

Stoichiometry H2O

Framework group CS[SG(H2O)]

Deg. of freedom 3

Full point group CS NOp 2

Largest Abelian subgroup CS NOp 2

Largest concise Abelian subgroup C1 NOp 1

Standard orientation:

| Center<br>Number | Atomic<br>Number | Atomic<br>Type | Coordinates (Angstroms) |           |          |
|------------------|------------------|----------------|-------------------------|-----------|----------|
|                  |                  |                | X                       | Y         | Z        |
| 1                | 8                | 0              | 0.000000                | 0.117319  | 0.000000 |
| 2                | 1                | 0              | 0.762910                | -0.469278 | 0.000000 |
| 3                | 1                | 0              | -0.762910               | -0.469278 | 0.000000 |

Rotational constants (GHZ): 820.4785628 430.7798306 282.4721242



**OH**

Electronic Energy -75.933126

Stoichiometry HO(1-)

Framework group C\*V[C\*(HO)]

Deg. of freedom 1

Full point group C\*V NOp 4

Largest Abelian subgroup C2V NOp 4

Largest concise Abelian subgroup C1 NOp 1

Standard orientation:

| Center<br>Number | Atomic<br>Number | Atomic<br>Type | Coordinates (Angstroms) |          |           |
|------------------|------------------|----------------|-------------------------|----------|-----------|
|                  |                  |                | X                       | Y        | Z         |
| 1                | 8                | 0              | 0.000000                | 0.000000 | 0.106682  |
| 2                | 1                | 0              | 0.000000                | 0.000000 | -0.853456 |

Rotational constants (GHZ): 0.0000000 578.2316725 578.2316725

**Phenol**

Electronic Energy -307.402564

Stoichiometry C6H6O

Framework group C1[X(C6H6O)]

Deg. of freedom 33

Full point group C1 NOp 1

Largest Abelian subgroup C1 NOp 1

Largest concise Abelian subgroup C1 NOp 1

Standard orientation:

| Center<br>Number | Atomic<br>Number | Atomic<br>Type | Coordinates (Angstroms) |           |           |
|------------------|------------------|----------------|-------------------------|-----------|-----------|
|                  |                  |                | X                       | Y         | Z         |
| 1                | 6                | 0              | 1.170096                | -1.182942 | 0.000139  |
| 2                | 6                | 0              | -0.216325               | -1.218421 | 0.000067  |
| 3                | 6                | 0              | -0.933742               | -0.026781 | -0.000049 |
| 4                | 6                | 0              | -0.266797               | 1.193150  | -0.000092 |
| 5                | 6                | 0              | 1.122456                | 1.215297  | -0.000020 |
| 6                | 6                | 0              | 1.848555                | 0.031503  | 0.000097  |
| 7                | 1                | 0              | 1.724770                | -2.113795 | 0.000230  |
| 8                | 1                | 0              | -0.753848               | -2.158810 | 0.000099  |
| 9                | 1                | 0              | -0.831047               | 2.119453  | -0.000181 |
| 10               | 1                | 0              | 1.636533                | 2.169086  | -0.000054 |
| 11               | 1                | 0              | 2.931073                | 0.053565  | 0.000154  |
| 12               | 8                | 0              | -2.295773               | -0.113423 | -0.000113 |
| 13               | 1                | 0              | -2.686758               | 0.767050  | -0.000206 |

Rotational constants (GHZ): 5.7005432 2.6371952 1.8030603

**Phenolate**

Electronic Energy -306.923698

Stoichiometry C6H5O(1-)

Framework group C1[X(C6H5O)]

Deg. of freedom 30

Full point group C1 NOp 1

Largest Abelian subgroup C1 NOp 1

Largest concise Abelian subgroup C1 NOp 1

Standard orientation:

| Center<br>Number | Atomic<br>Number | Atomic<br>Type | Coordinates (Angstroms) |           |           |
|------------------|------------------|----------------|-------------------------|-----------|-----------|
|                  |                  |                | X                       | Y         | Z         |
| 1                | 6                | 0              | 1.095853                | -1.194832 | 0.000011  |
| 2                | 6                | 0              | -0.287747               | -1.204774 | -0.000006 |
| 3                | 6                | 0              | -1.063112               | 0.000027  | -0.000028 |
| 4                | 6                | 0              | -0.287738               | 1.204785  | -0.000005 |
| 5                | 6                | 0              | 1.095889                | 1.194802  | 0.000022  |
| 6                | 6                | 0              | 1.816925                | -0.000006 | 0.000008  |
| 7                | 1                | 0              | 1.629846                | -2.141343 | 0.000014  |
| 8                | 1                | 0              | -0.828543               | -2.147154 | -0.000010 |
| 9                | 1                | 0              | -0.828452               | 2.147212  | -0.000011 |
| 10               | 1                | 0              | 1.629872                | 2.141321  | 0.000025  |

|    |   |   |           |           |           |
|----|---|---|-----------|-----------|-----------|
| 11 | 1 | 0 | 2.899792  | -0.000031 | 0.000019  |
| 12 | 8 | 0 | -2.340368 | -0.000003 | -0.000006 |

Rotational constants (GHZ):      5.7669783      2.7084259      1.8429131

#### Thymol

Electronic Energy -464.604235

Stoichiometry C<sub>10</sub>H<sub>14</sub>O

Framework group C1[X(C<sub>10</sub>H<sub>14</sub>O)]

Deg. of freedom 69

Full point group C<sub>1</sub> NOp 1

Largest Abelian subgroup C<sub>1</sub> NOp 1

Largest concise Abelian subgroup C<sub>1</sub> NOp 1

Standard orientation:

| Center<br>Number | Atomic<br>Number | Atomic<br>Type | Coordinates (Angstroms) |           |           |
|------------------|------------------|----------------|-------------------------|-----------|-----------|
|                  |                  |                | X                       | Y         | Z         |
| 1                | 6                | 0              | -2.100065               | -0.022229 | -0.192083 |
| 2                | 1                | 0              | -2.325439               | 0.776480  | -0.903950 |
| 3                | 6                | 0              | -0.588899               | -0.134566 | -0.122312 |
| 4                | 6                | 0              | 0.079867                | -1.340021 | 0.049265  |
| 5                | 6                | 0              | 0.202866                | 1.018808  | -0.200993 |
| 6                | 6                | 0              | 1.467182                | -1.411953 | 0.140870  |
| 7                | 1                | 0              | -0.491986               | -2.257732 | 0.110509  |
| 8                | 6                | 0              | 1.586022                | 0.956957  | -0.115506 |
| 9                | 6                | 0              | 2.240788                | -0.261155 | 0.058799  |
| 10               | 1                | 0              | 1.946531                | -2.375139 | 0.273850  |
| 11               | 1                | 0              | 2.162944                | 1.874741  | -0.186385 |
| 12               | 6                | 0              | -2.672610               | 0.401846  | 1.167327  |
| 13               | 1                | 0              | -3.753328               | 0.551732  | 1.100547  |
| 14               | 1                | 0              | -2.484186               | -0.370094 | 1.918851  |
| 15               | 1                | 0              | -2.220856               | 1.332608  | 1.513955  |
| 16               | 6                | 0              | -2.787352               | -1.292645 | -0.690129 |
| 17               | 1                | 0              | -3.855286               | -1.106974 | -0.824230 |
| 18               | 1                | 0              | -2.379101               | -1.623622 | -1.647644 |
| 19               | 1                | 0              | -2.688392               | -2.114742 | 0.023192  |
| 20               | 6                | 0              | 3.742564                | -0.310531 | 0.150377  |
| 21               | 1                | 0              | 4.206148                | 0.088153  | -0.755274 |
| 22               | 1                | 0              | 4.106076                | 0.287131  | 0.989837  |
| 23               | 1                | 0              | 4.094487                | -1.333451 | 0.287194  |
| 24               | 8                | 0              | -0.442435               | 2.214246  | -0.368821 |
| 25               | 1                | 0              | 0.199685                | 2.929868  | -0.423564 |

Rotational constants (GHZ):      2.0457303      0.7400549      0.5938891

#### Thymolate

Electronic Energy -464.121875

Stoichiometry C<sub>10</sub>H<sub>13</sub>O(1-)

Framework group C1[X(C<sub>10</sub>H<sub>13</sub>O)]

Deg. of freedom 66

Full point group C<sub>1</sub> NOp 1

Largest Abelian subgroup C<sub>1</sub> NOp 1

Largest concise Abelian subgroup C<sub>1</sub> NOp 1

Standard orientation:

| Center<br>Number | Atomic<br>Number | Atomic<br>Type | Coordinates (Angstroms) |           |           |
|------------------|------------------|----------------|-------------------------|-----------|-----------|
|                  |                  |                | X                       | Y         | Z         |
| 1                | 6                | 0              | -2.085488               | -0.034325 | -0.220176 |
| 2                | 1                | 0              | -2.286260               | 0.700279  | -1.008192 |
| 3                | 6                | 0              | -0.578375               | -0.132365 | -0.126126 |
| 4                | 6                | 0              | 0.099893                | -1.320371 | 0.067256  |
| 5                | 6                | 0              | 0.155059                | 1.113030  | -0.228058 |
| 6                | 6                | 0              | 1.493277                | -1.387660 | 0.171473  |
| 7                | 1                | 0              | -0.462922               | -2.247590 | 0.142234  |
| 8                | 6                | 0              | 1.577922                | 0.996592  | -0.122168 |
| 9                | 6                | 0              | 2.232555                | -0.208042 | 0.070542  |
| 10               | 1                | 0              | 1.989369                | -2.341008 | 0.325584  |
| 11               | 1                | 0              | 2.144182                | 1.921641  | -0.197626 |
| 12               | 6                | 0              | -2.676829               | 0.549692  | 1.069876  |

|    |   |   |           |           |           |
|----|---|---|-----------|-----------|-----------|
| 13 | 1 | 0 | -3.757133 | 0.716109  | 0.973575  |
| 14 | 1 | 0 | -2.510130 | -0.132092 | 1.911183  |
| 15 | 1 | 0 | -2.195806 | 1.503849  | 1.286599  |
| 16 | 6 | 0 | -2.786765 | -1.341406 | -0.585991 |
| 17 | 1 | 0 | -3.858960 | -1.171641 | -0.731008 |
| 18 | 1 | 0 | -2.381292 | -1.769178 | -1.506874 |
| 19 | 1 | 0 | -2.681341 | -2.092084 | 0.204262  |
| 20 | 6 | 0 | 3.741612  | -0.251093 | 0.130105  |
| 21 | 1 | 0 | 4.176051  | -0.368740 | -0.868991 |
| 22 | 1 | 0 | 4.147835  | 0.670297  | 0.555490  |
| 23 | 1 | 0 | 4.091598  | -1.089622 | 0.739197  |
| 24 | 8 | 0 | -0.431545 | 2.224433  | -0.398229 |

Rotational constants (GHZ):      2.1110515      0.7464748      0.5964394

## - 1H<sub>2</sub>O/B3LYP 6-311G+dp/SMD

### H<sub>2</sub>O

Electronic Energy -152.948642

Stoichiometry H4O2

Framework group C1[X(H4O2)]

Deg. of freedom 12

Full point group C1 NOp 1

Largest Abelian subgroup C1 NOp 1

Largest concise Abelian subgroup C1 NOp 1

Standard orientation:

| Center<br>Number | Atomic<br>Number | Atomic<br>Type | Coordinates (Angstroms) |           |           |
|------------------|------------------|----------------|-------------------------|-----------|-----------|
|                  |                  |                | X                       | Y         | Z         |
| 1                | 8                | 0              | 1.351337                | 0.000190  | 0.097379  |
| 2                | 1                | 0              | 1.788612                | 0.765301  | -0.295658 |
| 3                | 1                | 0              | 1.789643                | -0.765826 | -0.292737 |
| 4                | 8                | 0              | -1.500404               | -0.000257 | -0.119531 |
| 5                | 1                | 0              | -1.853959               | 0.002155  | 0.777237  |
| 6                | 1                | 0              | -0.531755               | -0.001099 | -0.011622 |

Rotational constants (GHZ):      223.3589304      6.6026795      6.5940576

### OH

Electronic Energy -152.462455

Stoichiometry H3O2(1-)

Framework group C1[X(H3O2)]

Deg. of freedom 9

Full point group C1 NOp 1

Largest Abelian subgroup C1 NOp 1

Largest concise Abelian subgroup C1 NOp 1

Standard orientation:

| Center<br>Number | Atomic<br>Number | Atomic<br>Type | Coordinates (Angstroms) |           |           |
|------------------|------------------|----------------|-------------------------|-----------|-----------|
|                  |                  |                | X                       | Y         | Z         |
| 1                | 8                | 0              | 1.286943                | 0.084111  | -0.074999 |
| 2                | 1                | 0              | 1.649047                | -0.511239 | 0.590619  |
| 3                | 8                | 0              | -1.265979               | -0.096278 | -0.055426 |
| 4                | 1                | 0              | -1.583273               | 0.634103  | 0.487062  |
| 5                | 1                | 0              | -0.233481               | -0.025523 | -0.034279 |

Rotational constants (GHZ):      321.6601960      8.6825052      8.6569125

### Phenol

Electronic Energy -384.045841

Stoichiometry C6H8O2

Framework group C1[X(C6H8O2)]

Deg. of freedom 42

Full point group C1 NOp 1

Largest Abelian subgroup C1 NOp 1

Largest concise Abelian subgroup C1 NOp 1

Standard orientation:

| Center<br>Number | Atomic<br>Number | Atomic<br>Type | Coordinates (Angstroms) |           |           |
|------------------|------------------|----------------|-------------------------|-----------|-----------|
|                  |                  |                | X                       | Y         | Z         |
| 1                | 6                | 0              | 0.017629                | 0.852135  | -0.013131 |
| 2                | 6                | 0              | 0.080231                | -0.541883 | -0.007240 |
| 3                | 6                | 0              | -1.091622               | -1.323582 | 0.009901  |
| 4                | 6                | 0              | -2.306420               | -0.639177 | 0.013842  |
| 5                | 6                | 0              | -2.375793               | 0.755394  | 0.002848  |
| 6                | 6                | 0              | -1.210463               | 1.520893  | -0.008032 |
| 7                | 1                | 0              | 0.945006                | 1.418120  | -0.023272 |
| 8                | 1                | 0              | -3.231584               | -1.203625 | 0.029163  |
| 9                | 1                | 0              | -3.344070               | 1.244736  | 0.005838  |
| 10               | 8                | 0              | 1.278017                | -1.201331 | -0.019232 |
| 11               | 1                | 0              | 2.017150                | -0.570381 | -0.005623 |
| 12               | 8                | 0              | 3.581293                | 0.486939  | 0.013293  |
| 13               | 1                | 0              | 4.177502                | 0.427315  | -0.740617 |
| 14               | 1                | 0              | 4.141374                | 0.456849  | 0.796140  |
| 15               | 1                | 0              | -1.244342               | 2.590324  | 0.000341  |
| 16               | 1                | 0              | -1.016884               | -2.390883 | -0.003594 |

Rotational constants (GHZ):      4.2437161      1.0980493      0.8759908

### Phenolate

Electronic Energy -383.574413

Stoichiometry C<sub>6</sub>H<sub>7</sub>O<sub>2</sub>(1-)

Framework group C1[X(C<sub>6</sub>H<sub>7</sub>O<sub>2</sub>)]

Deg. of freedom 39

Full point group C1 NOp 1

Largest Abelian subgroup C1 NOp 1

Largest concise Abelian subgroup C1 NOp 1

Standard orientation:

| Center<br>Number | Atomic<br>Number | Atomic<br>Type | Coordinates (Angstroms) |           |           |
|------------------|------------------|----------------|-------------------------|-----------|-----------|
|                  |                  |                | X                       | Y         | Z         |
| 1                | 6                | 0              | 0.061117                | 0.955713  | -0.079658 |
| 2                | 6                | 0              | -0.233249               | -0.442900 | -0.073693 |
| 3                | 6                | 0              | 0.901151                | -1.335862 | 0.014026  |
| 4                | 6                | 0              | 2.185324                | -0.808433 | 0.079679  |
| 5                | 6                | 0              | 2.436318                | 0.570893  | 0.064114  |
| 6                | 6                | 0              | 1.357190                | 1.459759  | -0.019130 |
| 7                | 1                | 0              | -0.785990               | 1.634950  | -0.135871 |
| 8                | 1                | 0              | 3.035425                | -1.482594 | 0.154208  |
| 9                | 1                | 0              | 3.455308                | 0.943432  | 0.122331  |
| 10               | 8                | 0              | -1.435510               | -0.900061 | -0.140253 |
| 11               | 8                | 0              | -3.729383               | 0.437692  | 0.040778  |
| 12               | 1                | 0              | -4.013116               | 0.083105  | 0.887373  |
| 13               | 1                | 0              | -2.839888               | -0.004886 | -0.097329 |
| 14               | 1                | 0              | 1.527130                | 2.515373  | -0.060341 |
| 15               | 1                | 0              | 0.693169                | -2.385454 | 0.013399  |

Rotational constants (GHZ):      4.7036232      1.0819473      0.8841047

### Thymol

Electronic Energy -541.343987

Stoichiometry C<sub>10</sub>H<sub>16</sub>O<sub>2</sub>

Framework group C1[X(C<sub>10</sub>H<sub>16</sub>O<sub>2</sub>)]

Deg. of freedom 78

Full point group C1 NOp 1

Largest Abelian subgroup C1 NOp 1

Largest concise Abelian subgroup C1 NOp 1

Standard orientation:

| Center<br>Number | Atomic<br>Number | Atomic<br>Type | Coordinates (Angstroms) |           |           |
|------------------|------------------|----------------|-------------------------|-----------|-----------|
|                  |                  |                | X                       | Y         | Z         |
| 1                | 6                | 0              | 1.513297                | -0.212673 | 0.001548  |
| 2                | 6                | 0              | 0.290876                | 0.454289  | -0.088394 |
| 3                | 6                | 0              | -0.926000               | -0.255129 | -0.111320 |
| 4                | 6                | 0              | -0.847417               | -1.645064 | -0.033449 |

|    |   |   |           |           |           |
|----|---|---|-----------|-----------|-----------|
| 5  | 6 | 0 | 0.372323  | -2.318053 | 0.061849  |
| 6  | 6 | 0 | 1.572032  | -1.607739 | 0.077800  |
| 7  | 1 | 0 | 2.429229  | 0.371625  | 0.013183  |
| 8  | 1 | 0 | -1.760800 | -2.228344 | -0.050236 |
| 9  | 1 | 0 | 0.384573  | -3.401290 | 0.120767  |
| 10 | 8 | 0 | 0.226875  | 1.818479  | -0.156184 |
| 11 | 1 | 0 | 1.119005  | 2.204097  | -0.157983 |
| 12 | 6 | 0 | -2.241653 | 0.507004  | -0.185037 |
| 13 | 1 | 0 | -2.061890 | 1.380429  | -0.819866 |
| 14 | 6 | 0 | -2.646019 | 1.035795  | 1.206578  |
| 15 | 1 | 0 | -1.856185 | 1.656825  | 1.633648  |
| 16 | 1 | 0 | -3.556713 | 1.640210  | 1.141501  |
| 17 | 1 | 0 | -2.838472 | 0.205728  | 1.893979  |
| 18 | 6 | 0 | -3.388636 | -0.295850 | -0.814150 |
| 19 | 1 | 0 | -4.265856 | 0.344818  | -0.942729 |
| 20 | 1 | 0 | -3.112666 | -0.691312 | -1.795477 |
| 21 | 1 | 0 | -3.694021 | -1.136971 | -0.184091 |
| 22 | 6 | 0 | 2.905283  | -2.313111 | 0.156358  |
| 23 | 1 | 0 | 3.446534  | -2.244943 | -0.793523 |
| 24 | 1 | 0 | 3.545764  | -1.873155 | 0.926541  |
| 25 | 1 | 0 | 2.778552  | -3.372470 | 0.389379  |
| 26 | 8 | 0 | 2.757321  | 3.142523  | -0.168261 |
| 27 | 1 | 0 | 2.938176  | 3.746129  | 0.559991  |
| 28 | 1 | 0 | 3.006688  | 3.613796  | -0.970236 |

Rotational constants (GHZ):      0.9273184      0.6662872      0.4149415

#### Thymolate

Electronic Energy -540.870574

Stoichiometry C10H15O2(1-)

Framework group C1[X(C10H15O2)]

Deg. of freedom 75

Full point group C1 NOp 1

Largest Abelian subgroup C1 NOp 1

Largest concise Abelian subgroup C1 NOp 1

Standard orientation:

| Center<br>Number | Atomic<br>Number | Atomic<br>Type | Coordinates (Angstroms) |           |           |
|------------------|------------------|----------------|-------------------------|-----------|-----------|
|                  |                  |                | X                       | Y         | Z         |
| 1                | 6                | 0              | -1.604135               | 0.085514  | 0.048441  |
| 2                | 6                | 0              | -0.263055               | 0.574629  | -0.022799 |
| 3                | 6                | 0              | 0.779506                | -0.424364 | -0.106575 |
| 4                | 6                | 0              | 0.439307                | -1.771901 | -0.107148 |
| 5                | 6                | 0              | -0.888573               | -2.215003 | -0.028573 |
| 6                | 6                | 0              | -1.919327               | -1.270277 | 0.052474  |
| 7                | 1                | 0              | -2.395266               | 0.829378  | 0.102212  |
| 8                | 1                | 0              | 1.225221                | -2.520173 | -0.178906 |
| 9                | 1                | 0              | -1.113253               | -3.278000 | -0.036953 |
| 10               | 8                | 0              | 0.019391                | 1.831225  | -0.015731 |
| 11               | 6                | 0              | 2.211407                | 0.078961  | -0.174619 |
| 12               | 1                | 0              | 2.181415                | 0.977900  | -0.802002 |
| 13               | 6                | 0              | 3.208327                | -0.908347 | -0.797003 |
| 14               | 1                | 0              | 2.880069                | -1.237885 | -1.787790 |
| 15               | 1                | 0              | 4.193605                | -0.439393 | -0.903326 |
| 16               | 1                | 0              | 3.340994                | -1.801857 | -0.176023 |
| 17               | 6                | 0              | 2.701361                | 0.541126  | 1.213236  |
| 18               | 1                | 0              | 3.700003                | 0.994122  | 1.151609  |
| 19               | 1                | 0              | 2.010859                | 1.283021  | 1.617729  |
| 20               | 1                | 0              | 2.753961                | -0.306781 | 1.906647  |
| 21               | 6                | 0              | -3.361189               | -1.717726 | 0.177957  |
| 22               | 1                | 0              | -3.673418               | -1.773969 | 1.228637  |
| 23               | 1                | 0              | -4.040057               | -1.020899 | -0.323370 |
| 24               | 1                | 0              | -3.510143               | -2.710364 | -0.259893 |
| 25               | 8                | 0              | -1.638189               | 3.903375  | -0.222697 |
| 26               | 1                | 0              | -1.356947               | 4.200673  | -1.091879 |
| 27               | 1                | 0              | -1.068445               | 3.091760  | -0.071623 |

Rotational constants (GHZ):      0.8770655      0.7143073      0.4215868

# - 1H<sub>2</sub>O/B3LYP 6-311G+dp/PCM

## H<sub>2</sub>O

Electronic Energy -152.948642

Stoichiometry H4O2

Framework group C1[X(H4O2)]

Deg. of freedom 12

Full point group C1 NOp 1

Largest Abelian subgroup C1 NOp 1

Largest concise Abelian subgroup C1 NOp 1

Standard orientation:

| Center<br>Number | Atomic<br>Number | Atomic<br>Type | Coordinates (Angstroms) |           |           |
|------------------|------------------|----------------|-------------------------|-----------|-----------|
|                  |                  |                | X                       | Y         | Z         |
| 1                | 8                | 0              | 1.354996                | -0.000069 | 0.095350  |
| 2                | 1                | 0              | 1.785425                | 0.769030  | -0.288545 |
| 3                | 1                | 0              | 1.787533                | -0.767656 | -0.289197 |
| 4                | 8                | 0              | -1.498925               | 0.000064  | -0.119702 |
| 5                | 1                | 0              | -1.882099               | 0.000036  | 0.759773  |
| 6                | 1                | 0              | -0.539428               | -0.001371 | 0.012785  |

Rotational constants (GHZ): 226.2594154 6.5900974 6.5775524

## OH

Electronic Energy -152.462455

Stoichiometry H3O2(1-)

Framework group C1[X(H3O2)]

Deg. of freedom 9

Full point group C1 NOp 1

Largest Abelian subgroup C1 NOp 1

Largest concise Abelian subgroup C1 NOp 1

Standard orientation:

| Center<br>Number | Atomic<br>Number | Atomic<br>Type | Coordinates (Angstroms) |           |           |
|------------------|------------------|----------------|-------------------------|-----------|-----------|
|                  |                  |                | X                       | Y         | Z         |
| 1                | 8                | 0              | 1.286943                | 0.084111  | -0.074999 |
| 2                | 1                | 0              | 1.649047                | -0.511239 | 0.590619  |
| 3                | 8                | 0              | -1.265979               | -0.096278 | -0.055426 |
| 4                | 1                | 0              | -1.583273               | 0.634103  | 0.487062  |
| 5                | 1                | 0              | -0.233481               | -0.025523 | -0.034279 |

Rotational constants (GHZ): 321.6601960 8.6825052 8.6569125

## Phenol

Electronic Energy -384.045841

Stoichiometry C6H8O2

Framework group C1[X(C6H8O2)]

Deg. of freedom 42

Full point group C1 NOp 1

Largest Abelian subgroup C1 NOp 1

Largest concise Abelian subgroup C1 NOp 1

Standard orientation:

| Center<br>Number | Atomic<br>Number | Atomic<br>Type | Coordinates (Angstroms) |           |           |
|------------------|------------------|----------------|-------------------------|-----------|-----------|
|                  |                  |                | X                       | Y         | Z         |
| 1                | 6                | 0              | 2.299681                | -0.636070 | 0.000103  |
| 2                | 6                | 0              | 1.074936                | -1.283268 | 0.000036  |
| 3                | 6                | 0              | -0.101809               | -0.539616 | -0.000071 |
| 4                | 6                | 0              | -0.041477               | 0.851868  | -0.000125 |
| 5                | 6                | 0              | 1.192748                | 1.488022  | -0.000058 |
| 6                | 6                | 0              | 2.369476                | 0.752629  | 0.000063  |
| 7                | 1                | 0              | 3.210615                | -1.223439 | 0.000176  |
| 8                | 1                | 0              | 1.007148                | -2.364014 | 0.000051  |
| 9                | 1                | 0              | -0.960991               | 1.426349  | -0.000233 |
| 10               | 1                | 0              | 1.230377                | 2.571314  | -0.000094 |
| 11               | 1                | 0              | 3.329412                | 1.253567  | 0.000127  |
| 12               | 8                | 0              | -1.276510               | -1.217316 | -0.000126 |
| 13               | 1                | 0              | -2.029068               | -0.603808 | -0.000262 |

|    |   |   |           |          |           |
|----|---|---|-----------|----------|-----------|
| 14 | 8 | 0 | -3.518559 | 0.486473 | 0.000071  |
| 15 | 1 | 0 | -4.094700 | 0.492744 | -0.769827 |
| 16 | 1 | 0 | -4.093570 | 0.492634 | 0.770816  |

-----  
Rotational constants (GHZ):        4.3158479        1.1226857        0.8947008  
Standard basis: 6-311+G(d,p) (5D, 7F)

#### Phenolate

Electronic Energy -383.574575

Stoichiometry C<sub>6</sub>H<sub>7</sub>O<sub>2</sub>(1-)

Framework group C1[X(C<sub>6</sub>H<sub>7</sub>O<sub>2</sub>)]

Deg. of freedom 39

Full point group C1 NOp 1

Largest Abelian subgroup C1 NOp 1

Largest concise Abelian subgroup C1 NOp 1

Standard orientation:

| Center<br>Number | Atomic<br>Number | Atomic<br>Type | Coordinates (Angstroms) |           |           |
|------------------|------------------|----------------|-------------------------|-----------|-----------|
|                  |                  |                | X                       | Y         | Z         |
| 1                | 6                | 0              | 2.211717                | -0.759237 | 0.053555  |
| 2                | 6                | 0              | 0.931431                | -1.304689 | 0.014124  |
| 3                | 6                | 0              | -0.227497               | -0.482554 | -0.043222 |
| 4                | 6                | 0              | -0.004295               | 0.921976  | -0.059414 |
| 5                | 6                | 0              | 1.281708                | 1.455034  | -0.019265 |
| 6                | 6                | 0              | 2.406546                | 0.625927  | 0.037688  |
| 7                | 1                | 0              | 3.069701                | -1.423838 | 0.097404  |
| 8                | 1                | 0              | 0.796763                | -2.382443 | 0.027412  |
| 9                | 1                | 0              | -0.864577               | 1.582608  | -0.104799 |
| 10               | 1                | 0              | 1.407828                | 2.533795  | -0.033217 |
| 11               | 1                | 0              | 3.405193                | 1.046345  | 0.069005  |
| 12               | 8                | 0              | -1.438051               | -1.003400 | -0.080390 |
| 13               | 8                | 0              | -3.649138               | 0.443109  | -0.021830 |
| 14               | 1                | 0              | -3.932333               | 0.451598  | 0.879969  |
| 15               | 1                | 0              | -2.782720               | -0.064481 | -0.018819 |

-----  
Rotational constants (GHZ):        4.6476062        1.1131429        0.9013112

#### Thymol

Electronic Energy -541.341186

Stoichiometry C<sub>10</sub>H<sub>16</sub>O<sub>2</sub>

Framework group C1[X(C<sub>10</sub>H<sub>16</sub>O<sub>2</sub>)]

Deg. of freedom 78

Full point group C1 NOp 1

Largest Abelian subgroup C1 NOp 1

Largest concise Abelian subgroup C1 NOp 1

Standard orientation:

| Center<br>Number | Atomic<br>Number | Atomic<br>Type | Coordinates (Angstroms) |           |           |
|------------------|------------------|----------------|-------------------------|-----------|-----------|
|                  |                  |                | X                       | Y         | Z         |
| 1                | 6                | 0              | -2.241832               | 0.506419  | -0.183581 |
| 2                | 1                | 0              | -2.063079               | 1.379046  | -0.819851 |
| 3                | 6                | 0              | -0.926202               | -0.255893 | -0.111356 |
| 4                | 6                | 0              | -0.847102               | -1.645812 | -0.037857 |
| 5                | 6                | 0              | 0.290811                | 0.453828  | -0.088650 |
| 6                | 6                | 0              | 0.373232                | -2.318737 | 0.054089  |
| 7                | 1                | 0              | -1.760087               | -2.229583 | -0.057336 |
| 8                | 6                | 0              | 1.513325                | -0.212798 | -0.001993 |
| 9                | 6                | 0              | 1.572502                | -1.608236 | 0.072006  |
| 10               | 1                | 0              | 0.385960                | -3.402212 | 0.107767  |
| 11               | 1                | 0              | 2.429211                | 0.371673  | 0.007682  |
| 12               | 6                | 0              | -2.643365               | 1.037131  | 1.208166  |
| 13               | 1                | 0              | -3.553891               | 1.641885  | 1.143940  |
| 14               | 1                | 0              | -2.835009               | 0.207942  | 1.896846  |
| 15               | 1                | 0              | -1.852483               | 1.658301  | 1.633036  |
| 16               | 6                | 0              | -3.390446               | -0.296724 | -0.809285 |
| 17               | 1                | 0              | -4.267719               | 0.344128  | -0.936535 |
| 18               | 1                | 0              | -3.116900               | -0.693316 | -1.790834 |
| 19               | 1                | 0              | -3.694638               | -1.137032 | -0.177569 |
| 20               | 6                | 0              | 2.905900                | -2.311533 | 0.165550  |

|    |   |   |          |           |           |
|----|---|---|----------|-----------|-----------|
| 21 | 1 | 0 | 3.533903 | -2.092322 | -0.704011 |
| 22 | 1 | 0 | 3.461581 | -1.995424 | 1.054240  |
| 23 | 1 | 0 | 2.777869 | -3.394598 | 0.219917  |
| 24 | 8 | 0 | 0.226114 | 1.818075  | -0.155711 |
| 25 | 1 | 0 | 1.118115 | 2.204058  | -0.158380 |
| 26 | 8 | 0 | 2.755820 | 3.143125  | -0.170666 |
| 27 | 1 | 0 | 2.939674 | 3.742420  | 0.560436  |
| 28 | 1 | 0 | 3.001088 | 3.619554  | -0.970865 |

Rotational constants (GHZ): 0.9272535 0.6663954 0.4149521  
Standard basis: 6-311+G(d,p) (5D, 7F)

#### Thymolate

Electronic Energy -540.864600

Stoichiometry C10H15O2(1-)

Framework group C1[X(C10H15O2)]

Deg. of freedom 75

Full point group C1 NOp 1

Largest Abelian subgroup C1 NOp 1

Largest concise Abelian subgroup C1 NOp 1

Standard orientation:

| Center<br>Number | Atomic<br>Number | Atomic<br>Type | Coordinates (Angstroms) |           |           |
|------------------|------------------|----------------|-------------------------|-----------|-----------|
|                  |                  |                | X                       | Y         | Z         |
| 1                | 6                | 0              | -2.211037               | 0.080903  | -0.184138 |
| 2                | 1                | 0              | -2.177088               | 0.976012  | -0.816695 |
| 3                | 6                | 0              | -0.780029               | -0.423735 | -0.106937 |
| 4                | 6                | 0              | -0.442832               | -1.771809 | -0.087467 |
| 5                | 6                | 0              | 0.263641                | 0.574202  | -0.023188 |
| 6                | 6                | 0              | 0.883529                | -2.216540 | 0.007099  |
| 7                | 1                | 0              | -1.230443               | -2.519385 | -0.147344 |
| 8                | 6                | 0              | 1.602990                | 0.083383  | 0.064772  |
| 9                | 6                | 0              | 1.915824                | -1.272984 | 0.079989  |
| 10               | 1                | 0              | 1.105542                | -3.280037 | 0.021446  |
| 11               | 1                | 0              | 2.394577                | 0.826238  | 0.125548  |
| 12               | 6                | 0              | -2.707048               | 0.551464  | 1.198670  |
| 13               | 1                | 0              | -3.704951               | 1.005065  | 1.129834  |
| 14               | 1                | 0              | -2.763754               | -0.292429 | 1.896639  |
| 15               | 1                | 0              | -2.017700               | 1.294969  | 1.602194  |
| 16               | 6                | 0              | -3.205755               | -0.909188 | -0.805697 |
| 17               | 1                | 0              | -4.189842               | -0.439754 | -0.920661 |
| 18               | 1                | 0              | -2.872198               | -1.245599 | -1.792402 |
| 19               | 1                | 0              | -3.343132               | -1.798483 | -0.179728 |
| 20               | 6                | 0              | 3.361737                | -1.721355 | 0.137123  |
| 21               | 1                | 0              | 3.815867                | -1.739362 | -0.861887 |
| 22               | 1                | 0              | 3.964420                | -1.046589 | 0.753010  |
| 23               | 1                | 0              | 3.449961                | -2.730169 | 0.553828  |
| 24               | 8                | 0              | -0.017179               | 1.831225  | -0.025175 |
| 25               | 8                | 0              | 1.645887                | 3.900937  | -0.211246 |
| 26               | 1                | 0              | 1.380124                | 4.195923  | -1.086056 |
| 27               | 1                | 0              | 1.072831                | 3.090259  | -0.067720 |

Rotational constants (GHZ): 0.8776610 0.7144013 0.4213500

### - 1H<sub>2</sub>O/B3LYP 6-311G+dp/CPCM

#### H<sub>2</sub>O

Electronic Energy -152.939271

Stoichiometry H4O2

Framework group CS[SG(H4O2)]

Deg. of freedom 9

Full point group CS NOp 2

Largest Abelian subgroup CS NOp 2

Largest concise Abelian subgroup C1 NOp 1



Standard orientation:

| Center<br>Number | Atomic<br>Number | Atomic<br>Type | Coordinates (Angstroms) |           |          |
|------------------|------------------|----------------|-------------------------|-----------|----------|
|                  |                  |                | X                       | Y         | Z        |
| 1                | 8                | 0              | 0.043084                | -1.322998 | 0.000000 |
| 2                | 1                | 0              | 0.863967                | -1.830672 | 0.000000 |
| 3                | 1                | 0              | -0.663929               | -1.980160 | 0.000000 |
| 4                | 8                | 0              | 0.043084                | 1.506358  | 0.000000 |
| 5                | 1                | 0              | -0.017438               | 0.533042  | 0.000000 |
| 6                | 1                | 0              | -0.871948               | 1.810910  | 0.000000 |

Rotational constants (GHZ):      256.9766853      6.7208756      6.5495802

#### OH<sup>-</sup>

Electronic Energy -152.446206

Stoichiometry H3O2(1-)

Framework group C1[X(H3O2)]

Deg. of freedom 9

Full point group C1 NOp 1

Largest Abelian subgroup C1 NOp 1

Largest concise Abelian subgroup C1 NOp 1

Standard orientation:

| Center<br>Number | Atomic<br>Number | Atomic<br>Type | Coordinates (Angstroms) |           |           |
|------------------|------------------|----------------|-------------------------|-----------|-----------|
|                  |                  |                | X                       | Y         | Z         |
| 1                | 8                | 0              | -1.265642               | -0.095902 | -0.055845 |
| 2                | 1                | 0              | -0.233004               | -0.024905 | -0.035014 |
| 3                | 1                | 0              | -1.582945               | 0.632042  | 0.490001  |
| 4                | 8                | 0              | 1.287035                | 0.083728  | -0.075323 |
| 5                | 1                | 0              | 1.644805                | -0.509741 | 0.594352  |

Rotational constants (GHZ):      321.1116234      8.6850650      8.6616058s

#### Phenol

Electronic Energy -307.093078

Stoichiometry C6H8O2

Framework group C1[X(C6H8O2)]

Deg. of freedom 42

Full point group C1 NOp 1

Largest Abelian subgroup C1 NOp 1

Largest concise Abelian subgroup C1 NOp 1

Standard orientation:

| Center<br>Number | Atomic<br>Number | Atomic<br>Type | Coordinates (Angstroms) |           |           |
|------------------|------------------|----------------|-------------------------|-----------|-----------|
|                  |                  |                | X                       | Y         | Z         |
| 1                | 6                | 0              | -0.012594               | 0.902009  | 0.003906  |
| 2                | 6                | 0              | 0.115152                | -0.490796 | 0.007013  |
| 3                | 6                | 0              | -1.026996               | -1.297642 | 0.002636  |
| 4                | 6                | 0              | -2.289777               | -0.709773 | -0.004235 |
| 5                | 6                | 0              | -2.427730               | 0.680024  | -0.007152 |
| 6                | 6                | 0              | -1.283113               | 1.477825  | -0.003105 |
| 7                | 1                | 0              | 0.875100                | 1.524337  | 0.006930  |
| 8                | 1                | 0              | -3.170102               | -1.343193 | -0.007621 |
| 9                | 1                | 0              | -3.412097               | 1.133213  | -0.012575 |
| 10               | 8                | 0              | 1.337089                | -1.117632 | 0.014882  |
| 11               | 1                | 0              | 2.077163                | -0.467969 | 0.006611  |
| 12               | 8                | 0              | 3.569165                | 0.494075  | -0.036885 |
| 13               | 1                | 0              | 4.209970                | 0.087283  | -0.634936 |
| 14               | 1                | 0              | 4.008049                | 0.502275  | 0.823971  |
| 15               | 1                | 0              | -1.373862               | 2.558574  | -0.005288 |
| 16               | 1                | 0              | -0.913908               | -2.375947 | 0.004547  |

Rotational constants (GHZ):      4.4388152      1.0905213      0.8788403

#### Phenolate

Electronic Energy -383.566995

Stoichiometry C6H7O2(1-)

Framework group C1[X(C6H7O2)]

Deg. of freedom 39

Full point group C1 NOp 1  
 Largest Abelian subgroup C1 NOp 1  
 Largest concise Abelian subgroup C1 NOp 1  
 Standard orientation:

| Center<br>Number | Atomic<br>Number | Atomic<br>Type | Coordinates (Angstroms) |           |           |
|------------------|------------------|----------------|-------------------------|-----------|-----------|
|                  |                  |                | X                       | Y         | Z         |
| 1                | 6                | 0              | -0.001738               | 0.923763  | -0.040080 |
| 2                | 6                | 0              | -0.227116               | -0.480495 | -0.031117 |
| 3                | 6                | 0              | 0.930970                | -1.304913 | 0.008169  |
| 4                | 6                | 0              | 2.212522                | -0.761822 | 0.037600  |
| 5                | 6                | 0              | 2.409527                | 0.623107  | 0.028979  |
| 6                | 6                | 0              | 1.285528                | 1.454419  | -0.010131 |
| 7                | 1                | 0              | -0.861344               | 1.586088  | -0.071410 |
| 8                | 1                | 0              | 3.069819                | -1.428082 | 0.067651  |
| 9                | 1                | 0              | 3.409180                | 1.041645  | 0.052247  |
| 10               | 8                | 0              | -1.438865               | -0.999195 | -0.058998 |
| 11               | 8                | 0              | -3.644452               | 0.456651  | -0.042325 |
| 12               | 1                | 0              | -4.034996               | 0.323718  | 0.828890  |
| 13               | 1                | 0              | -2.782220               | -0.057897 | -0.024777 |
| 14               | 1                | 0              | 1.413363                | 2.533044  | -0.018105 |
| 15               | 1                | 0              | 0.794584                | -2.382519 | 0.015572  |

Rotational constants (GHZ): 4.6564646 1.1119832 0.9002697

### Thymol

Electronic Energy -541.341260

Stoichiometry C10H16O2

Framework group C1[X(C10H16O2)]

Deg. of freedom 78

Full point group C1 NOp 1

Largest Abelian subgroup C1 NOp 1

Largest concise Abelian subgroup C1 NOp 1

Standard orientation:

| Center<br>Number | Atomic<br>Number | Atomic<br>Type | Coordinates (Angstroms) |           |           |
|------------------|------------------|----------------|-------------------------|-----------|-----------|
|                  |                  |                | X                       | Y         | Z         |
| 1                | 6                | 0              | 1.536889                | -0.193111 | 0.001718  |
| 2                | 6                | 0              | 0.305894                | 0.460410  | -0.081382 |
| 3                | 6                | 0              | -0.904606               | -0.261363 | -0.107661 |
| 4                | 6                | 0              | -0.809738               | -1.652963 | -0.034062 |
| 5                | 6                | 0              | 0.418179                | -2.313000 | 0.056726  |
| 6                | 6                | 0              | 1.612188                | -1.588601 | 0.072550  |
| 7                | 1                | 0              | 2.446085                | 0.399685  | 0.014264  |
| 8                | 1                | 0              | -1.717023               | -2.245986 | -0.048425 |
| 9                | 1                | 0              | 0.443472                | -3.396224 | 0.112983  |
| 10               | 8                | 0              | 0.235816                | 1.833487  | -0.139783 |
| 11               | 1                | 0              | 1.131967                | 2.237611  | -0.133441 |
| 12               | 6                | 0              | -2.237846               | 0.472379  | -0.171396 |
| 13               | 1                | 0              | -2.074973               | 1.382433  | -0.756348 |
| 14               | 6                | 0              | -2.689935               | 0.907799  | 1.236773  |
| 15               | 1                | 0              | -1.929088               | 1.515500  | 1.733305  |
| 16               | 1                | 0              | -3.610141               | 1.497992  | 1.180470  |
| 17               | 1                | 0              | -2.887317               | 0.032835  | 1.864761  |
| 18               | 6                | 0              | -3.348728               | -0.324984 | -0.867700 |
| 19               | 1                | 0              | -4.239508               | 0.300508  | -0.976579 |
| 20               | 1                | 0              | -3.044278               | -0.653402 | -1.865689 |
| 21               | 1                | 0              | -3.639671               | -1.209540 | -0.293614 |
| 22               | 6                | 0              | 2.952408                | -2.278034 | 0.146847  |
| 23               | 1                | 0              | 3.490656                | -2.196930 | -0.803612 |
| 24               | 1                | 0              | 3.588705                | -1.829894 | 0.915427  |
| 25               | 1                | 0              | 2.837286                | -3.339763 | 0.374790  |
| 26               | 8                | 0              | 2.628463                | 3.229702  | -0.154151 |
| 27               | 1                | 0              | 2.581616                | 3.927080  | 0.513249  |
| 28               | 1                | 0              | 2.699759                | 3.701391  | -0.994542 |

Rotational constants (GHZ): 0.9155426 0.6726760 0.4165496

**Thymolate**

Electronic Energy -541.341260

Stoichiometry C10H16O2

Framework group C1[X(C10H16O2)]

Deg. of freedom 78

Full point group C1 NOp 1

Largest Abelian subgroup C1 NOp 1

Largest concise Abelian subgroup C1 NOp 1

Standard orientation:

| Center<br>Number | Atomic<br>Number | Atomic<br>Type | Coordinates (Angstroms) |           |           |
|------------------|------------------|----------------|-------------------------|-----------|-----------|
|                  |                  |                | X                       | Y         | Z         |
| 1                | 6                | 0              | 1.536889                | -0.193111 | 0.001718  |
| 2                | 6                | 0              | 0.305894                | 0.460410  | -0.081382 |
| 3                | 6                | 0              | -0.904606               | -0.261363 | -0.107661 |
| 4                | 6                | 0              | -0.809738               | -1.652963 | -0.034062 |
| 5                | 6                | 0              | 0.418179                | -2.313000 | 0.056726  |
| 6                | 6                | 0              | 1.612188                | -1.588601 | 0.072550  |
| 7                | 1                | 0              | 2.446085                | 0.399685  | 0.014264  |
| 8                | 1                | 0              | -1.717023               | -2.245986 | -0.048425 |
| 9                | 1                | 0              | 0.443472                | -3.396224 | 0.112983  |
| 10               | 8                | 0              | 0.235816                | 1.833487  | -0.139783 |
| 11               | 1                | 0              | 1.131967                | 2.237611  | -0.133441 |
| 12               | 6                | 0              | -2.237846               | 0.472379  | -0.171396 |
| 13               | 1                | 0              | -2.074973               | 1.382433  | -0.756348 |
| 14               | 6                | 0              | -2.689935               | 0.907799  | 1.236773  |
| 15               | 1                | 0              | -1.929088               | 1.515500  | 1.733305  |
| 16               | 1                | 0              | -3.610141               | 1.497992  | 1.180470  |
| 17               | 1                | 0              | -2.887317               | 0.032835  | 1.864761  |
| 18               | 6                | 0              | -3.348728               | -0.324984 | -0.867700 |
| 19               | 1                | 0              | -4.239508               | 0.300508  | -0.976579 |
| 20               | 1                | 0              | -3.044278               | -0.653402 | -1.865689 |
| 21               | 1                | 0              | -3.639671               | -1.209540 | -0.293614 |
| 22               | 6                | 0              | 2.952408                | -2.278034 | 0.146847  |
| 23               | 1                | 0              | 3.490656                | -2.196930 | -0.803612 |
| 24               | 1                | 0              | 3.588705                | -1.829894 | 0.915427  |
| 25               | 1                | 0              | 2.837286                | -3.339763 | 0.374790  |
| 26               | 8                | 0              | 2.628463                | 3.229702  | -0.154151 |
| 27               | 1                | 0              | 2.581616                | 3.927080  | 0.513249  |
| 28               | 1                | 0              | 2.699759                | 3.701391  | -0.994542 |

Rotational constants (GHZ): 0.9155426 0.6726760 0.4165496

**- 1H<sub>2</sub>O/B3PW91 6-311G+dp/SMD****H<sub>2</sub>O**

Electronic Energy -152.886443

Stoichiometry H4O2

Framework group CS[SG(H4O2)]

Deg. of freedom 9

Full point group CS NOp 2

Largest Abelian subgroup CS NOp 2

Largest concise Abelian subgroup C1 NOp 1

Standard orientation:

| Center<br>Number | Atomic<br>Number | Atomic<br>Type | Coordinates (Angstroms) |           |          |
|------------------|------------------|----------------|-------------------------|-----------|----------|
|                  |                  |                | X                       | Y         | Z        |
| 1                | 8                | 0              | 0.042979                | -1.310810 | 0.000000 |
| 2                | 1                | 0              | 0.856448                | -1.822131 | 0.000000 |
| 3                | 1                | 0              | -0.668011               | -1.957162 | 0.000000 |
| 4                | 8                | 0              | 0.042979                | 1.494760  | 0.000000 |
| 5                | 1                | 0              | -0.003287               | 0.524076  | 0.000000 |
| 6                | 1                | 0              | -0.872813               | 1.783614  | 0.000000 |

Rotational constants (GHZ): 257.6563606 6.8393964 6.6625416

**OH<sup>-</sup>**

Electronic Energy -152.398046

Stoichiometry H3O2(1-)

Framework group C1[X(H3O2)]

Deg. of freedom 9

Full point group C1 NOp 1

Largest Abelian subgroup C1 NOp 1

Largest concise Abelian subgroup C1 NOp 1

Standard orientation:

| Center<br>Number | Atomic<br>Number | Atomic<br>Type | Coordinates (Angstroms) |           |           |
|------------------|------------------|----------------|-------------------------|-----------|-----------|
|                  |                  |                | X                       | Y         | Z         |
| 1                | 8                | 0              | -1.272942               | -0.097719 | -0.051169 |
| 2                | 1                | 0              | -0.255045               | -0.030517 | -0.034728 |
| 3                | 1                | 0              | -1.584111               | 0.651130  | 0.461892  |
| 4                | 8                | 0              | 1.294469                | 0.080563  | -0.077675 |
| 5                | 1                | 0              | 1.666939                | -0.483366 | 0.603582  |

Rotational constants (GHZ):      325.4595069      8.5856481      8.5606474

**Phenol**

Electronic Energy -383.909558

Stoichiometry C6H8O2

Framework group C1[X(C6H8O2)]

Deg. of freedom 42

Full point group C1 NOp 1

Largest Abelian subgroup C1 NOp 1

Largest concise Abelian subgroup C1 NOp 1

Standard orientation:

| Center<br>Number | Atomic<br>Number | Atomic<br>Type | Coordinates (Angstroms) |           |           |
|------------------|------------------|----------------|-------------------------|-----------|-----------|
|                  |                  |                | X                       | Y         | Z         |
| 1                | 6                | 0              | 0.000762                | 0.891143  | 0.001746  |
| 2                | 6                | 0              | 0.117993                | -0.496199 | 0.005679  |
| 3                | 6                | 0              | -1.023895               | -1.292530 | 0.003289  |
| 4                | 6                | 0              | -2.277735               | -0.698911 | -0.002436 |
| 5                | 6                | 0              | -2.405945               | 0.686156  | -0.006136 |
| 6                | 6                | 0              | -1.260849               | 1.473063  | -0.004055 |
| 7                | 1                | 0              | 0.892903                | 1.506109  | 0.003079  |
| 8                | 1                | 0              | -3.161897               | -1.325828 | -0.004248 |
| 9                | 1                | 0              | -3.386658               | 1.145616  | -0.010633 |
| 10               | 8                | 0              | 1.331806                | -1.125248 | 0.012348  |
| 11               | 1                | 0              | 2.075401                | -0.480402 | 0.005527  |
| 12               | 8                | 0              | 3.518483                | 0.492134  | -0.033283 |
| 13               | 1                | 0              | 4.175614                | 0.124055  | -0.636968 |
| 14               | 1                | 0              | 3.961400                | 0.536118  | 0.823222  |
| 15               | 1                | 0              | -1.344687               | 2.553692  | -0.006907 |
| 16               | 1                | 0              | -0.916373               | -2.370780 | 0.005891  |

Rotational constants (GHZ):      4.4550873      1.1135613      0.8943871

**Phenolate**

Electronic Energy -383.435157

Stoichiometry C6H7O2(1-)

Framework group C1[X(C6H7O2)]

Deg. of freedom 39

Full point group C1 NOp 1

Largest Abelian subgroup C1 NOp 1

Largest concise Abelian subgroup C1 NOp 1

Standard orientation:

| Center<br>Number | Atomic<br>Number | Atomic<br>Type | Coordinates (Angstroms) |           |           |
|------------------|------------------|----------------|-------------------------|-----------|-----------|
|                  |                  |                | X                       | Y         | Z         |
| 1                | 6                | 0              | -0.013052               | 0.914708  | -0.040474 |
| 2                | 6                | 0              | -0.228561               | -0.483276 | -0.030988 |
| 3                | 6                | 0              | 0.925250                | -1.299963 | 0.008502  |
| 4                | 6                | 0              | 2.199333                | -0.753455 | 0.037758  |
| 5                | 6                | 0              | 2.389484                | 0.626336  | 0.028802  |

|    |   |   |           |           |           |
|----|---|---|-----------|-----------|-----------|
| 6  | 6 | 0 | 1.266612  | 1.449092  | -0.010624 |
| 7  | 1 | 0 | -0.876279 | 1.570981  | -0.072233 |
| 8  | 1 | 0 | 3.058722  | -1.415614 | 0.068087  |
| 9  | 1 | 0 | 3.386592  | 1.048991  | 0.052078  |
| 10 | 8 | 0 | -1.435476 | -1.004689 | -0.058785 |
| 11 | 8 | 0 | -3.595381 | 0.462367  | -0.041306 |
| 12 | 1 | 0 | -3.996254 | 0.331757  | 0.823968  |
| 13 | 1 | 0 | -2.741546 | -0.068583 | -0.026226 |
| 14 | 1 | 0 | 1.389348  | 2.527439  | -0.018933 |
| 15 | 1 | 0 | 0.791876  | -2.377050 | 0.016133  |

Rotational constants (GHZ): 4.6770234 1.1349725 0.9160416

#### Thymol

Electronic Energy -541.164144

Stoichiometry C10H16O2

Framework group C1[X(C10H16O2)]

Deg. of freedom 78

Full point group C1 NOp 1

Largest Abelian subgroup C1 NOp 1

Largest concise Abelian subgroup C1 NOp 1

Standard orientation:

| Center<br>Number | Atomic<br>Number | Atomic<br>Type | Coordinates (Angstroms) |           |           |
|------------------|------------------|----------------|-------------------------|-----------|-----------|
|                  |                  |                | X                       | Y         | Z         |
| 1                | 6                | 0              | 1.529590                | -0.172414 | 0.004903  |
| 2                | 6                | 0              | 0.296197                | 0.461624  | -0.083415 |
| 3                | 6                | 0              | -0.899135               | -0.272445 | -0.113123 |
| 4                | 6                | 0              | -0.789493               | -1.656185 | -0.040685 |
| 5                | 6                | 0              | 0.442036                | -2.298182 | 0.054712  |
| 6                | 6                | 0              | 1.620468                | -1.561330 | 0.075766  |
| 7                | 1                | 0              | 2.430896                | 0.431300  | 0.020466  |
| 8                | 1                | 0              | -1.688897               | -2.259727 | -0.060229 |
| 9                | 1                | 0              | 0.482024                | -3.380314 | 0.110309  |
| 10               | 8                | 0              | 0.208465                | 1.826618  | -0.145735 |
| 11               | 1                | 0              | 1.097135                | 2.245634  | -0.140078 |
| 12               | 6                | 0              | -2.232878               | 0.447369  | -0.183926 |
| 13               | 1                | 0              | -2.086837               | 1.329643  | -0.812635 |
| 14               | 6                | 0              | -2.657137               | 0.937784  | 1.206034  |
| 15               | 1                | 0              | -1.891769               | 1.569691  | 1.660835  |
| 16               | 1                | 0              | -3.581944               | 1.517777  | 1.144179  |
| 17               | 1                | 0              | -2.835318               | 0.088669  | 1.872278  |
| 18               | 6                | 0              | -3.346561               | -0.385913 | -0.814273 |
| 19               | 1                | 0              | -4.241974               | 0.228107  | -0.936848 |
| 20               | 1                | 0              | -3.060473               | -0.764596 | -1.798466 |
| 21               | 1                | 0              | -3.620073               | -1.239297 | -0.188710 |
| 22               | 6                | 0              | 2.965153                | -2.230897 | 0.156717  |
| 23               | 1                | 0              | 3.510617                | -2.129723 | -0.785686 |
| 24               | 1                | 0              | 3.584096                | -1.783367 | 0.937693  |
| 25               | 1                | 0              | 2.861754                | -3.295610 | 0.370414  |
| 26               | 8                | 0              | 2.570413                | 3.205243  | -0.164455 |
| 27               | 1                | 0              | 2.571173                | 3.893423  | 0.512434  |
| 28               | 1                | 0              | 2.669118                | 3.677038  | -1.000703 |

Rotational constants (GHZ): 0.9316196 0.6818526 0.4217409

#### Thymolate

Electronic Energy -540.687949

Stoichiometry C10H15O2(1-)

Framework group C1[X(C10H15O2)]

Deg. of freedom 75

Full point group C1 NOp 1

Largest Abelian subgroup C1 NOp 1

Largest concise Abelian subgroup C1 NOp 1

Standard orientation:

| Center<br>Number | Atomic<br>Number | Atomic<br>Type | Coordinates (Angstroms) |           |           |
|------------------|------------------|----------------|-------------------------|-----------|-----------|
|                  |                  |                | X                       | Y         | Z         |
| 1                | 6                | 0              | -1.572919               | -0.004228 | 0.042850  |
| 2                | 6                | 0              | -0.287717               | 0.570611  | -0.037248 |

|    |   |   |           |           |           |
|----|---|---|-----------|-----------|-----------|
| 3  | 6 | 0 | 0.830926  | -0.312396 | -0.109413 |
| 4  | 6 | 0 | 0.599679  | -1.680433 | -0.090243 |
| 5  | 6 | 0 | -0.682281 | -2.224992 | -0.003555 |
| 6  | 6 | 0 | -1.785515 | -1.379691 | 0.064679  |
| 7  | 1 | 0 | -2.424547 | 0.668428  | 0.091218  |
| 8  | 1 | 0 | 1.443299  | -2.359699 | -0.148756 |
| 9  | 1 | 0 | -0.817552 | -3.301061 | 0.005321  |
| 10 | 8 | 0 | -0.128784 | 1.878335  | -0.049286 |
| 11 | 6 | 0 | 2.228170  | 0.274503  | -0.173860 |
| 12 | 1 | 0 | 2.158785  | 1.188161  | -0.771518 |
| 13 | 6 | 0 | 3.258603  | -0.634510 | -0.841338 |
| 14 | 1 | 0 | 2.935086  | -0.950849 | -1.836226 |
| 15 | 1 | 0 | 4.208476  | -0.104489 | -0.949590 |
| 16 | 1 | 0 | 3.454082  | -1.532657 | -0.249400 |
| 17 | 6 | 0 | 2.714266  | 0.682208  | 1.223088  |
| 18 | 1 | 0 | 3.683737  | 1.186229  | 1.168228  |
| 19 | 1 | 0 | 2.009394  | 1.359018  | 1.710160  |
| 20 | 1 | 0 | 2.829898  | -0.200730 | 1.859172  |
| 21 | 6 | 0 | -3.183290 | -1.931286 | 0.174822  |
| 22 | 1 | 0 | -3.599752 | -1.754574 | 1.170834  |
| 23 | 1 | 0 | -3.856699 | -1.457405 | -0.543459 |
| 24 | 1 | 0 | -3.198169 | -3.007739 | -0.004472 |
| 25 | 8 | 0 | -2.118852 | 3.549618  | -0.171352 |
| 26 | 1 | 0 | -2.184873 | 3.820153  | -1.092708 |
| 27 | 1 | 0 | -1.379610 | 2.864871  | -0.142401 |

Rotational constants (GHZ):      0.9341078      0.6990864      0.4295606

## - 1H<sub>2</sub>O/B3PW91 6-311G+dp/PCM

### H<sub>2</sub>O

Electronic Energy -152.878150

Stoichiometry H4O2

Framework group C1[X(H4O2)]

Deg. of freedom 12

Full point group C1 NOp 1

Largest Abelian subgroup C1 NOp 1

Largest concise Abelian subgroup C1 NOp 1

Standard orientation:

| Center<br>Number | Atomic<br>Number | Atomic<br>Type | Coordinates (Angstroms) |           |           |
|------------------|------------------|----------------|-------------------------|-----------|-----------|
|                  |                  |                | X                       | Y         | Z         |
| 1                | 8                | 0              | 1.334098                | -0.000066 | 0.089003  |
| 2                | 1                | 0              | 1.802929                | 0.766671  | -0.260945 |
| 3                | 1                | 0              | 1.805153                | -0.765474 | -0.260862 |
| 4                | 8                | 0              | -1.492632               | -0.000059 | -0.117740 |
| 5                | 1                | 0              | -1.818990               | 0.000437  | 0.788019  |
| 6                | 1                | 0              | -0.520820               | -0.000636 | -0.036318 |

Rotational constants (GHZ):      227.6237525      6.7080289      6.6950899

### OH<sup>-</sup>

Electronic Energy -152.380924

Stoichiometry H3O2(1-)

Framework group C1[X(H3O2)]

Deg. of freedom 9

Full point group C1 NOp 1

Largest Abelian subgroup C1 NOp 1

Largest concise Abelian subgroup C1 NOp 1

Standard orientation:

| Center<br>Number | Atomic<br>Number | Atomic<br>Type | Coordinates (Angstroms) |           |           |
|------------------|------------------|----------------|-------------------------|-----------|-----------|
|                  |                  |                | X                       | Y         | Z         |
| 1                | 8                | 0              | 1.260773                | 0.034490  | -0.105350 |
| 2                | 1                | 0              | 1.669783                | -0.137266 | 0.749182  |
| 3                | 8                | 0              | -1.248911               | -0.110104 | -0.006106 |
| 4                | 1                | 0              | -1.570442               | 0.780839  | 0.161116  |

5      1      0    -0.194238 -0.038664 -0.018653

---

Rotational constants (GHZ):      330.2884982      8.9463552      8.9345926

### Phenol

Electronic Energy -383.885897  
 Stoichiometry C<sub>6</sub>H<sub>8</sub>O<sub>2</sub>  
 Framework group C1[X(C<sub>6</sub>H<sub>8</sub>O<sub>2</sub>)]  
 Deg. of freedom 42  
 Full point group C1 NOp 1  
 Largest Abelian subgroup C1 NOp 1  
 Largest concise Abelian subgroup C1 NOp 1  
 Standard orientation:

| Center<br>Number | Atomic<br>Number | Atomic<br>Type | Coordinates (Angstroms) |           |           |
|------------------|------------------|----------------|-------------------------|-----------|-----------|
|                  |                  |                | X                       | Y         | Z         |
| 1                | 6                | 0              | -2.305940               | -0.657742 | 0.000397  |
| 2                | 6                | 0              | -1.068674               | -1.288109 | 0.000151  |
| 3                | 6                | 0              | 0.101481                | -0.525797 | -0.000195 |
| 4                | 6                | 0              | 0.017373                | 0.869010  | -0.000283 |
| 5                | 6                | 0              | -1.229030               | 1.487799  | -0.000036 |
| 6                | 6                | 0              | -2.397611               | 0.732904  | 0.000306  |
| 7                | 1                | 0              | -3.208856               | -1.260501 | 0.000663  |
| 8                | 1                | 0              | -0.986813               | -2.369531 | 0.000216  |
| 9                | 1                | 0              | 0.927948                | 1.460676  | -0.000537 |
| 10               | 1                | 0              | -1.282413               | 2.572170  | -0.000109 |
| 11               | 1                | 0              | -3.366556               | 1.219969  | 0.000497  |
| 12               | 8                | 0              | 1.284496                | -1.187186 | -0.000426 |
| 13               | 1                | 0              | 2.026815                | -0.559706 | -0.000697 |
| 14               | 8                | 0              | 3.575561                | 0.485053  | 0.000057  |
| 15               | 1                | 0              | 4.151302                | 0.421785  | 0.767053  |
| 16               | 1                | 0              | 4.152531                | 0.423819  | -0.766176 |

Rotational constants (GHZ):      4.3498922      1.0963247      0.8792435

### Phenolate

Electronic Energy -383.409709  
 Stoichiometry C<sub>6</sub>H<sub>7</sub>O<sub>2</sub>(1-)  
 Framework group C1[X(C<sub>6</sub>H<sub>7</sub>O<sub>2</sub>)]  
 Deg. of freedom 39  
 Full point group C1 NOp 1  
 Largest Abelian subgroup C1 NOp 1  
 Largest concise Abelian subgroup C1 NOp 1  
 Standard orientation:

| Center<br>Number | Atomic<br>Number | Atomic<br>Type | Coordinates (Angstroms) |           |           |
|------------------|------------------|----------------|-------------------------|-----------|-----------|
|                  |                  |                | X                       | Y         | Z         |
| 1                | 6                | 0              | 2.193046                | -0.779378 | 0.092862  |
| 2                | 6                | 0              | 0.910938                | -1.302351 | 0.022639  |
| 3                | 6                | 0              | -0.251447               | -0.469672 | -0.079583 |
| 4                | 6                | 0              | 0.019451                | 0.938229  | -0.105316 |
| 5                | 6                | 0              | 1.309407                | 1.442613  | -0.034423 |
| 6                | 6                | 0              | 2.421796                | 0.600591  | 0.066969  |
| 7                | 1                | 0              | 3.039715                | -1.461411 | 0.169516  |
| 8                | 1                | 0              | 0.749100                | -2.377541 | 0.043092  |
| 9                | 1                | 0              | -0.831079               | 1.610210  | -0.189121 |
| 10               | 1                | 0              | 1.456022                | 2.522237  | -0.059862 |
| 11               | 1                | 0              | 3.428707                | 1.004177  | 0.121588  |
| 12               | 8                | 0              | -1.432997               | -0.959144 | -0.141818 |
| 13               | 8                | 0              | -3.680683               | 0.425442  | 0.046481  |
| 14               | 1                | 0              | -3.730861               | 0.464492  | 1.003205  |
| 15               | 1                | 0              | -2.821308               | -0.072740 | -0.104610 |

Rotational constants (GHZ):      4.6935869      1.1049544      0.9002358

### Thymol

Electronic Energy -541.129084  
 Stoichiometry C<sub>10</sub>H<sub>16</sub>O<sub>2</sub>  
 Framework group C1[X(C<sub>10</sub>H<sub>16</sub>O<sub>2</sub>)]

Deg. of freedom 78  
 Full point group C1 NOp 1  
 Largest Abelian subgroup C1 NOp 1  
 Largest concise Abelian subgroup C1 NOp 1  
 Standard orientation:

| Center<br>Number | Atomic<br>Number | Atomic<br>Type | Coordinates (Angstroms) |           |           |
|------------------|------------------|----------------|-------------------------|-----------|-----------|
|                  |                  |                | X                       | Y         | Z         |
| 1                | 6                | 0              | -2.233195               | 0.503821  | -0.183742 |
| 2                | 1                | 0              | -2.053842               | 1.375569  | -0.823186 |
| 3                | 6                | 0              | -0.922875               | -0.256146 | -0.112223 |
| 4                | 6                | 0              | -0.845028               | -1.643774 | -0.041152 |
| 5                | 6                | 0              | 0.291914                | 0.453190  | -0.087643 |
| 6                | 6                | 0              | 0.372302                | -2.316848 | 0.051190  |
| 7                | 1                | 0              | -1.760463               | -2.225930 | -0.063507 |
| 8                | 6                | 0              | 1.511656                | -0.214496 | -0.000401 |
| 9                | 6                | 0              | 1.570109                | -1.607809 | 0.071902  |
| 10               | 1                | 0              | 0.385068                | -3.401377 | 0.103069  |
| 11               | 1                | 0              | 2.428893                | 0.369703  | 0.010716  |
| 12               | 6                | 0              | -2.627255               | 1.033864  | 1.203462  |
| 13               | 1                | 0              | -3.538874               | 1.638240  | 1.144008  |
| 14               | 1                | 0              | -2.814717               | 0.204629  | 1.893902  |
| 15               | 1                | 0              | -1.834232               | 1.655775  | 1.624651  |
| 16               | 6                | 0              | -3.377779               | -0.299440 | -0.801491 |
| 17               | 1                | 0              | -4.256048               | 0.340066  | -0.932475 |
| 18               | 1                | 0              | -3.104948               | -0.703246 | -1.780845 |
| 19               | 1                | 0              | -3.682137               | -1.135480 | -0.163154 |
| 20               | 6                | 0              | 2.898166                | -2.309603 | 0.165816  |
| 21               | 1                | 0              | 3.527620                | -2.089224 | -0.702797 |
| 22               | 1                | 0              | 3.452883                | -1.995125 | 1.056078  |
| 23               | 1                | 0              | 2.769538                | -3.393082 | 0.218270  |
| 24               | 8                | 0              | 0.227537                | 1.810308  | -0.154785 |
| 25               | 1                | 0              | 1.120304                | 2.193731  | -0.156193 |
| 26               | 8                | 0              | 2.733772                | 3.153163  | -0.170881 |
| 27               | 1                | 0              | 2.889274                | 3.764438  | 0.554323  |
| 28               | 1                | 0              | 2.953126                | 3.636993  | -0.971846 |

Rotational constants (GHZ): 0.9273236 0.6725540 0.4170877

### Thymolate

Electronic Energy -540.650595  
 Stoichiometry C10H15O2(1-)  
 Framework group C1[X(C10H15O2)]  
 Deg. of freedom 75  
 Full point group C1 NOp 1  
 Largest Abelian subgroup C1 NOp 1  
 Largest concise Abelian subgroup C1 NOp 1  
 Standard orientation:

| Center<br>Number | Atomic<br>Number | Atomic<br>Type | Coordinates (Angstroms) |           |           |
|------------------|------------------|----------------|-------------------------|-----------|-----------|
|                  |                  |                | X                       | Y         | Z         |
| 1                | 6                | 0              | -2.209121               | 0.115018  | -0.185339 |
| 2                | 1                | 0              | -2.159902               | 1.011017  | -0.818013 |
| 3                | 6                | 0              | -0.790274               | -0.406684 | -0.108010 |
| 4                | 6                | 0              | -0.470176               | -1.756754 | -0.097435 |
| 5                | 6                | 0              | 0.260689                | 0.577980  | -0.014910 |
| 6                | 6                | 0              | 0.848103                | -2.216797 | -0.001182 |
| 7                | 1                | 0              | -1.268680               | -2.493727 | -0.166336 |
| 8                | 6                | 0              | 1.591235                | 0.071849  | 0.076392  |
| 9                | 6                | 0              | 1.888426                | -1.286318 | 0.083508  |
| 10               | 1                | 0              | 1.059256                | -3.283544 | 0.005911  |
| 11               | 1                | 0              | 2.391764                | 0.805584  | 0.147529  |
| 12               | 6                | 0              | -2.691195               | 0.590266  | 1.193611  |
| 13               | 1                | 0              | -3.683860               | 1.056772  | 1.130970  |
| 14               | 1                | 0              | -2.753623               | -0.252863 | 1.892577  |
| 15               | 1                | 0              | -1.988646               | 1.325433  | 1.591802  |
| 16               | 6                | 0              | -3.211616               | -0.859958 | -0.802351 |
| 17               | 1                | 0              | -4.190595               | -0.379730 | -0.920020 |
| 18               | 1                | 0              | -2.880906               | -1.204843 | -1.787675 |



|    |   |   |           |           |           |
|----|---|---|-----------|-----------|-----------|
| 19 | 1 | 0 | -3.360312 | -1.745326 | -0.172311 |
| 20 | 6 | 0 | 3.324007  | -1.749220 | 0.144921  |
| 21 | 1 | 0 | 3.781611  | -1.768296 | -0.852799 |
| 22 | 1 | 0 | 3.931687  | -1.083075 | 0.765841  |
| 23 | 1 | 0 | 3.399696  | -2.760874 | 0.558068  |
| 24 | 8 | 0 | -0.008101 | 1.833856  | -0.013344 |
| 25 | 8 | 0 | 1.726483  | 3.824295  | -0.221994 |
| 26 | 1 | 0 | 1.627050  | 3.982204  | -1.162434 |
| 27 | 1 | 0 | 1.107950  | 3.049768  | -0.065628 |

Rotational constants (GHZ): 0.8943994 0.7159769 0.4257734

## - 1H<sub>2</sub>O/B3PW91 6-311G+dp/CPCM

### H<sub>2</sub>O

Electronic Energy -152.877702

Stoichiometry H4O2

Framework group CS[SG(H4O2)]

Deg. of freedom 9

Full point group CS NOp 2

Largest Abelian subgroup CS NOp 2

Largest concise Abelian subgroup C1 NOp 1

Standard orientation:

| Center<br>Number | Atomic<br>Number | Atomic<br>Type | Coordinates (Angstroms) |           |          |
|------------------|------------------|----------------|-------------------------|-----------|----------|
|                  |                  |                | X                       | Y         | Z        |
| 1                | 8                | 0              | 0.045584                | -1.314418 | 0.000000 |
| 2                | 1                | 0              | 0.829499                | -1.867307 | 0.000000 |
| 3                | 1                | 0              | -0.702108               | -1.915371 | 0.000000 |
| 4                | 8                | 0              | 0.045584                | 1.499140  | 0.000000 |
| 5                | 1                | 0              | 0.015429                | 0.529285  | 0.000000 |
| 6                | 1                | 0              | -0.872162               | 1.775611  | 0.000000 |

Rotational constants (GHZ): 256.3755065 6.8081813 6.6320635

### OH

Electronic Energy -152.381017

Stoichiometry H3O2(1-)

Framework group C1[X(H3O2)]

Deg. of freedom 9

Full point group C1 NOp 1

Largest Abelian subgroup C1 NOp 1

Largest concise Abelian subgroup C1 NOp 1

Standard orientation:

| Center<br>Number | Atomic<br>Number | Atomic<br>Type | Coordinates (Angstroms) |           |           |
|------------------|------------------|----------------|-------------------------|-----------|-----------|
|                  |                  |                | X                       | Y         | Z         |
| 1                | 8                | 0              | -1.256784               | -0.104035 | 0.032085  |
| 2                | 1                | 0              | -0.221801               | -0.047540 | -0.000815 |
| 3                | 1                | 0              | -1.569288               | 0.788654  | -0.117705 |
| 4                | 8                | 0              | 1.268793                | -0.007788 | -0.109062 |
| 5                | 1                | 0              | 1.695009                | 0.153470  | 0.734339  |

Rotational constants (GHZ): 335.7120513 8.8339780 8.8226331

### Phenol

Electronic Energy -383.885969

Stoichiometry C6H8O2

Framework group C1[X(C6H8O2)]

Deg. of freedom 42

Full point group C1 NOp 1

Largest Abelian subgroup C1 NOp 1

Largest concise Abelian subgroup C1 NOp 1

Standard orientation:

| Center<br>Number | Atomic<br>Number | Atomic<br>Type | Coordinates (Angstroms) |           |           |
|------------------|------------------|----------------|-------------------------|-----------|-----------|
|                  |                  |                | X                       | Y         | Z         |
| 1                | 6                | 0              | 0.061482                | 0.850652  | -0.007396 |
| 2                | 6                | 0              | 0.121125                | -0.544696 | -0.003013 |
| 3                | 6                | 0              | -1.060190               | -1.288230 | 0.003350  |
| 4                | 6                | 0              | -2.287747               | -0.638345 | 0.005708  |
| 5                | 6                | 0              | -2.355533               | 0.752912  | 0.001737  |
| 6                | 6                | 0              | -1.174670               | 1.488472  | -0.004917 |
| 7                | 1                | 0              | 0.981180                | 1.425509  | -0.013242 |
| 8                | 1                | 0              | -3.199359               | -1.226040 | 0.010818  |
| 9                | 1                | 0              | -3.315510               | 1.255645  | 0.003731  |
| 10               | 8                | 0              | 1.294238                | -1.221391 | -0.004887 |
| 11               | 1                | 0              | 2.050503                | -0.603454 | -0.004518 |
| 12               | 8                | 0              | 3.435666                | 0.500601  | -0.000870 |
| 13               | 1                | 0              | 4.066478                | 0.434778  | -0.721988 |
| 14               | 1                | 0              | 3.962777                | 0.553636  | 0.800131  |
| 15               | 1                | 0              | -1.210355               | 2.572549  | -0.008277 |
| 16               | 1                | 0              | -1.001748               | -2.370894 | 0.006580  |

Rotational constants (GHZ):      4.2914228      1.1538699      0.9132167

### Phenolate

Electronic Energy -383.409854

Stoichiometry C<sub>6</sub>H<sub>7</sub>O<sub>2</sub>(1-)

Framework group C1[X(C<sub>6</sub>H<sub>7</sub>O<sub>2</sub>)]

Deg. of freedom 39

Full point group C1 NOp 1

Largest Abelian subgroup C1 NOp 1

Largest concise Abelian subgroup C1 NOp 1

Standard orientation:

| Center<br>Number | Atomic<br>Number | Atomic<br>Type | Coordinates (Angstroms) |           |           |
|------------------|------------------|----------------|-------------------------|-----------|-----------|
|                  |                  |                | X                       | Y         | Z         |
| 1                | 6                | 0              | -0.037190               | 0.900741  | 0.018607  |
| 2                | 6                | 0              | -0.240451               | -0.508852 | 0.021065  |
| 3                | 6                | 0              | 0.941603                | -1.301860 | 0.002469  |
| 4                | 6                | 0              | 2.206787                | -0.731591 | -0.016107 |
| 5                | 6                | 0              | 2.376047                | 0.654055  | -0.017999 |
| 6                | 6                | 0              | 1.234842                | 1.456843  | -0.000245 |
| 7                | 1                | 0              | -0.911611               | 1.545587  | 0.031566  |
| 8                | 1                | 0              | 3.079089                | -1.379692 | -0.029903 |
| 9                | 1                | 0              | 3.366657                | 1.094342  | -0.032558 |
| 10               | 8                | 0              | -1.421051               | -1.042385 | 0.039367  |
| 11               | 8                | 0              | -3.608882               | 0.402238  | -0.114686 |
| 12               | 1                | 0              | -3.597257               | 1.003760  | 0.630907  |
| 13               | 1                | 0              | -2.755437               | -0.114664 | -0.046295 |
| 14               | 1                | 0              | 1.338492                | 2.538717  | -0.001133 |
| 15               | 1                | 0              | 0.829705                | -2.382888 | 0.003224  |

Rotational constants (GHZ):      4.6150800      1.1430330      0.9182562

### Thymol

Electronic Energy -541.129162

Stoichiometry C<sub>10</sub>H<sub>16</sub>O<sub>2</sub>

Framework group C1[X(C<sub>10</sub>H<sub>16</sub>O<sub>2</sub>)]

Deg. of freedom 78

Full point group C1 NOp 1

Largest Abelian subgroup C1 NOp 1

Largest concise Abelian subgroup C1 NOp 1

Standard orientation:

| Center<br>Number | Atomic<br>Number | Atomic<br>Type | Coordinates (Angstroms) |           |           |
|------------------|------------------|----------------|-------------------------|-----------|-----------|
|                  |                  |                | X                       | Y         | Z         |
| 1                | 6                | 0              | 1.514706                | -0.149226 | -0.007248 |
| 2                | 6                | 0              | 0.277910                | 0.484582  | -0.100509 |
| 3                | 6                | 0              | -0.915691               | -0.258198 | -0.120030 |

|    |   |   |           |           |           |
|----|---|---|-----------|-----------|-----------|
| 4  | 6 | 0 | -0.802924 | -1.641815 | -0.035759 |
| 5  | 6 | 0 | 0.431762  | -2.281292 | 0.062216  |
| 6  | 6 | 0 | 1.608466  | -1.539067 | 0.075918  |
| 7  | 1 | 0 | 2.415568  | 0.457808  | 0.001212  |
| 8  | 1 | 0 | -1.701744 | -2.248566 | -0.048442 |
| 9  | 1 | 0 | 0.473356  | -3.363812 | 0.125802  |
| 10 | 8 | 0 | 0.181142  | 1.836575  | -0.177215 |
| 11 | 1 | 0 | 1.066311  | 2.246778  | -0.170027 |
| 12 | 6 | 0 | -2.249713 | 0.461974  | -0.185997 |
| 13 | 1 | 0 | -2.106444 | 1.338829  | -0.825139 |
| 14 | 6 | 0 | -2.651469 | 0.969033  | 1.207040  |
| 15 | 1 | 0 | -1.874008 | 1.606800  | 1.633753  |
| 16 | 1 | 0 | -3.579320 | 1.546908  | 1.155940  |
| 17 | 1 | 0 | -2.813698 | 0.124964  | 1.885602  |
| 18 | 6 | 0 | -3.373097 | -0.377775 | -0.795335 |
| 19 | 1 | 0 | -4.266489 | 0.238567  | -0.927293 |
| 20 | 1 | 0 | -3.090416 | -0.780640 | -1.771740 |
| 21 | 1 | 0 | -3.649784 | -1.215898 | -0.148254 |
| 22 | 6 | 0 | 2.958771  | -2.202487 | 0.165061  |
| 23 | 1 | 0 | 3.525334  | -2.061568 | -0.760252 |
| 24 | 1 | 0 | 3.553772  | -1.777873 | 0.978143  |
| 25 | 1 | 0 | 2.860655  | -3.275751 | 0.339065  |
| 26 | 8 | 0 | 2.650557  | 3.060399  | -0.156795 |
| 27 | 1 | 0 | 2.827037  | 3.667526  | 0.566039  |
| 28 | 1 | 0 | 2.913953  | 3.525767  | -0.954471 |

Rotational constants (GHZ):      0.9677892      0.6719645      0.4248944

#### Thymolate

Electronic Energy -540.650786

Stoichiometry C10H15O2(1-)

Framework group C1[X(C10H15O2)]

Deg. of freedom 75

Full point group C1 NOp 1

Largest Abelian subgroup C1 NOp 1

Largest concise Abelian subgroup C1 NOp 1

Standard orientation:

| Center<br>Number | Atomic<br>Number | Atomic<br>Type | Coordinates (Angstroms) |           |           |
|------------------|------------------|----------------|-------------------------|-----------|-----------|
|                  |                  |                | X                       | Y         | Z         |
| 1                | 6                | 0              | -1.568571               | -0.010475 | -0.014161 |
| 2                | 6                | 0              | -0.284269               | 0.588681  | -0.093056 |
| 3                | 6                | 0              | 0.843463                | -0.298098 | -0.112117 |
| 4                | 6                | 0              | 0.627658                | -1.667605 | -0.046890 |
| 5                | 6                | 0              | -0.650797               | -2.226865 | 0.036886  |
| 6                | 6                | 0              | -1.764121               | -1.387614 | 0.056124  |
| 7                | 1                | 0              | -2.432129               | 0.651642  | -0.005710 |
| 8                | 1                | 0              | 1.482324                | -2.338685 | -0.065905 |
| 9                | 1                | 0              | -0.774100               | -3.304723 | 0.082276  |
| 10               | 8                | 0              | -0.134512               | 1.876687  | -0.151672 |
| 11               | 6                | 0              | 2.233634                | 0.304380  | -0.165415 |
| 12               | 1                | 0              | 2.144936                | 1.230520  | -0.742822 |
| 13               | 6                | 0              | 3.276185                | -0.582124 | -0.849447 |
| 14               | 1                | 0              | 2.946431                | -0.894905 | -1.844453 |
| 15               | 1                | 0              | 4.219840                | -0.038974 | -0.958956 |
| 16               | 1                | 0              | 3.488449                | -1.484304 | -0.266224 |
| 17               | 6                | 0              | 2.708588                | 0.695249  | 1.241821  |
| 18               | 1                | 0              | 3.674274                | 1.211132  | 1.204517  |
| 19               | 1                | 0              | 1.985642                | 1.355996  | 1.726151  |
| 20               | 1                | 0              | 2.826488                | -0.198522 | 1.864844  |
| 21               | 6                | 0              | -3.159324               | -1.952345 | 0.176942  |
| 22               | 1                | 0              | -3.526248               | -1.874133 | 1.205890  |
| 23               | 1                | 0              | -3.864810               | -1.412158 | -0.460232 |
| 24               | 1                | 0              | -3.186240               | -3.008390 | -0.102656 |
| 25               | 8                | 0              | -2.160909               | 3.528268  | -0.112504 |
| 26               | 1                | 0              | -2.785006               | 3.224236  | -0.772699 |
| 27               | 1                | 0              | -1.411158               | 2.862530  | -0.134740 |

Rotational constants (GHZ):      0.9440347      0.6947001      0.4302093

- 1H<sub>2</sub>O/wB97XD 6-311G+dp/SMD

**H<sub>2</sub>O**

Electronic Energy -152.896706

Stoichiometry H<sub>4</sub>O<sub>2</sub>

Framework group CS[SG(H<sub>4</sub>O<sub>2</sub>)]

Deg. of freedom 9

Full point group CS NOp 2

Largest Abelian subgroup CS NOp 2

Largest concise Abelian subgroup C1 NOp 1

Standard orientation:

| Center<br>Number | Atomic<br>Number | Atomic<br>Type | Coordinates (Angstroms) |           |          |
|------------------|------------------|----------------|-------------------------|-----------|----------|
|                  |                  |                | X                       | Y         | Z        |
| 1                | 8                | 0              | 0.042923                | -1.304271 | 0.000000 |
| 2                | 1                | 0              | 0.865162                | -1.807645 | 0.000000 |
| 3                | 1                | 0              | -0.664621               | -1.959180 | 0.000000 |
| 4                | 8                | 0              | 0.042923                | 1.486150  | 0.000000 |
| 5                | 1                | 0              | -0.019215               | 0.513336  | 0.000000 |
| 6                | 1                | 0              | -0.868093               | 1.798458  | 0.000000 |

Rotational constants (GHZ): 257.5224356 6.9032862 6.7230641

**OH**

Electronic Energy -152.407030

Stoichiometry H<sub>3</sub>O<sub>2</sub>(1-)

Framework group C1[X(H<sub>3</sub>O<sub>2</sub>)]

Deg. of freedom 9

Full point group C1 NOp 1

Largest Abelian subgroup C1 NOp 1

Largest concise Abelian subgroup C1 NOp 1

Standard orientation:

| Center<br>Number | Atomic<br>Number | Atomic<br>Type | Coordinates (Angstroms) |           |           |
|------------------|------------------|----------------|-------------------------|-----------|-----------|
|                  |                  |                | X                       | Y         | Z         |
| 1                | 8                | 0              | -1.254900               | -0.097993 | -0.052049 |
| 2                | 1                | 0              | -0.221200               | -0.027234 | -0.033958 |
| 3                | 1                | 0              | -1.577792               | 0.645290  | 0.466560  |
| 4                | 8                | 0              | 1.273510                | 0.081450  | -0.077286 |
| 5                | 1                | 0              | 1.650111                | -0.485711 | 0.602077  |

Rotational constants (GHZ): 325.4958404 8.8377839 8.8122087

**Phenol**

Electronic Energy -383.909558

Stoichiometry C<sub>6</sub>H<sub>8</sub>O<sub>2</sub>

Framework group C1[X(C<sub>6</sub>H<sub>8</sub>O<sub>2</sub>)]

Deg. of freedom 42

Full point group C1 NOp 1

Largest Abelian subgroup C1 NOp 1

Largest concise Abelian subgroup C1 NOp 1

Standard orientation:

| Center<br>Number | Atomic<br>Number | Atomic<br>Type | Coordinates (Angstroms) |           |           |
|------------------|------------------|----------------|-------------------------|-----------|-----------|
|                  |                  |                | X                       | Y         | Z         |
| 1                | 6                | 0              | 0.000762                | 0.891143  | 0.001746  |
| 2                | 6                | 0              | 0.117993                | -0.496199 | 0.005679  |
| 3                | 6                | 0              | -1.023895               | -1.292530 | 0.003289  |
| 4                | 6                | 0              | -2.277735               | -0.698911 | -0.002436 |
| 5                | 6                | 0              | -2.405945               | 0.686156  | -0.006136 |
| 6                | 6                | 0              | -1.260849               | 1.473063  | -0.004055 |
| 7                | 1                | 0              | 0.892903                | 1.506109  | 0.003079  |
| 8                | 1                | 0              | -3.161897               | -1.325828 | -0.004248 |
| 9                | 1                | 0              | -3.386658               | 1.145616  | -0.010633 |
| 10               | 8                | 0              | 1.331806                | -1.125248 | 0.012348  |
| 11               | 1                | 0              | 2.075401                | -0.480402 | 0.005527  |
| 12               | 8                | 0              | 3.518483                | 0.492134  | -0.033283 |
| 13               | 1                | 0              | 4.175614                | 0.124055  | -0.636968 |

|    |   |   |           |           |           |
|----|---|---|-----------|-----------|-----------|
| 14 | 1 | 0 | 3.961400  | 0.536118  | 0.823222  |
| 15 | 1 | 0 | -1.344687 | 2.553692  | -0.006907 |
| 16 | 1 | 0 | -0.916373 | -2.370780 | 0.005891  |

Rotational constants (GHZ):      4.4550873      1.1135613      0.894387

#### Phenolate

Electronic Energy -383.435157

Stoichiometry C<sub>6</sub>H<sub>7</sub>O<sub>2</sub>(1-)

Framework group C1[X(C<sub>6</sub>H<sub>7</sub>O<sub>2</sub>)]

Deg. of freedom 39

Full point group C1 NOp 1

Largest Abelian subgroup C1 NOp 1

Largest concise Abelian subgroup C1 NOp 1

Standard orientation:

| Center<br>Number | Atomic<br>Number | Atomic<br>Type | Coordinates (Angstroms) |           |           |
|------------------|------------------|----------------|-------------------------|-----------|-----------|
|                  |                  |                | X                       | Y         | Z         |
| 1                | 6                | 0              | -0.013052               | 0.914708  | -0.040474 |
| 2                | 6                | 0              | -0.228561               | -0.483276 | -0.030988 |
| 3                | 6                | 0              | 0.925250                | -1.299963 | 0.008502  |
| 4                | 6                | 0              | 2.199333                | -0.753455 | 0.037758  |
| 5                | 6                | 0              | 2.389484                | 0.626336  | 0.028802  |
| 6                | 6                | 0              | 1.266612                | 1.449092  | -0.010624 |
| 7                | 1                | 0              | -0.876279               | 1.570981  | -0.072233 |
| 8                | 1                | 0              | 3.058722                | -1.415614 | 0.068087  |
| 9                | 1                | 0              | 3.386592                | 1.048991  | 0.052078  |
| 10               | 8                | 0              | -1.435476               | -1.004689 | -0.058785 |
| 11               | 8                | 0              | -3.595381               | 0.462367  | -0.041306 |
| 12               | 1                | 0              | -3.996254               | 0.331757  | 0.823968  |
| 13               | 1                | 0              | -2.741546               | -0.068583 | -0.026226 |
| 14               | 1                | 0              | 1.389348                | 2.527439  | -0.018933 |
| 15               | 1                | 0              | 0.791876                | -2.377050 | 0.016133  |

Rotational constants (GHZ):      4.6770234      1.1349725      0.9160416

#### Thymol

Electronic Energy -541.164144

Stoichiometry C<sub>10</sub>H<sub>16</sub>O<sub>2</sub>

Framework group C1[X(C<sub>10</sub>H<sub>16</sub>O<sub>2</sub>)]

Deg. of freedom 78

Full point group C1 NOp 1

Largest Abelian subgroup C1 NOp 1

Largest concise Abelian subgroup C1 NOp 1

Standard orientation:

| Center<br>Number | Atomic<br>Number | Atomic<br>Type | Coordinates (Angstroms) |           |           |
|------------------|------------------|----------------|-------------------------|-----------|-----------|
|                  |                  |                | X                       | Y         | Z         |
| 1                | 6                | 0              | 1.529590                | -0.172414 | 0.004903  |
| 2                | 6                | 0              | 0.296197                | 0.461624  | -0.083415 |
| 3                | 6                | 0              | -0.899135               | -0.272445 | -0.113123 |
| 4                | 6                | 0              | -0.789493               | -1.656185 | -0.040685 |
| 5                | 6                | 0              | 0.442036                | -2.298182 | 0.054712  |
| 6                | 6                | 0              | 1.620468                | -1.561330 | 0.075766  |
| 7                | 1                | 0              | 2.430896                | 0.431300  | 0.020466  |
| 8                | 1                | 0              | -1.688897               | -2.259727 | -0.060229 |
| 9                | 1                | 0              | 0.482024                | -3.380314 | 0.110309  |
| 10               | 8                | 0              | 0.208465                | 1.826618  | -0.145735 |
| 11               | 1                | 0              | 1.097135                | 2.245634  | -0.140078 |
| 12               | 6                | 0              | -2.232878               | 0.447369  | -0.183926 |
| 13               | 1                | 0              | -2.086837               | 1.329643  | -0.812635 |
| 14               | 6                | 0              | -2.657137               | 0.937784  | 1.206034  |
| 15               | 1                | 0              | -1.891769               | 1.569691  | 1.660835  |
| 16               | 1                | 0              | -3.581944               | 1.517777  | 1.144179  |
| 17               | 1                | 0              | -2.835318               | 0.088669  | 1.872278  |
| 18               | 6                | 0              | -3.346561               | -0.385913 | -0.814273 |
| 19               | 1                | 0              | -4.241974               | 0.228107  | -0.936848 |
| 20               | 1                | 0              | -3.060473               | -0.764596 | -1.798466 |
| 21               | 1                | 0              | -3.620073               | -1.239297 | -0.188710 |

|    |   |   |          |           |           |
|----|---|---|----------|-----------|-----------|
| 22 | 6 | 0 | 2.965153 | -2.230897 | 0.156717  |
| 23 | 1 | 0 | 3.510617 | -2.129723 | -0.785686 |
| 24 | 1 | 0 | 3.584096 | -1.783367 | 0.937693  |
| 25 | 1 | 0 | 2.861754 | -3.295610 | 0.370414  |
| 26 | 8 | 0 | 2.570413 | 3.205243  | -0.164455 |
| 27 | 1 | 0 | 2.571173 | 3.893423  | 0.512434  |
| 28 | 1 | 0 | 2.669118 | 3.677038  | -1.000703 |

Rotational constants (GHZ):            0.9316196            0.6818526            0.4217409

**Thymolate**

Electronic Energy -540.687949

Stoichiometry C10H15O2(1-)

Framework group C1[X(C10H15O2)]

Deg. of freedom 75

Full point group C1 NOp 1

Largest Abelian subgroup C1 NOp 1

Largest concise Abelian subgroup C1 NOp 1

Standard orientation:

| Center<br>Number | Atomic<br>Number | Atomic<br>Type | Coordinates (Angstroms) |           |           |
|------------------|------------------|----------------|-------------------------|-----------|-----------|
|                  |                  |                | X                       | Y         | Z         |
| 1                | 6                | 0              | -1.572919               | -0.004228 | 0.042850  |
| 2                | 6                | 0              | -0.287717               | 0.570611  | -0.037248 |
| 3                | 6                | 0              | 0.830926                | -0.312396 | -0.109413 |
| 4                | 6                | 0              | 0.599679                | -1.680433 | -0.090243 |
| 5                | 6                | 0              | -0.682281               | -2.224992 | -0.003555 |
| 6                | 6                | 0              | -1.785515               | -1.379691 | 0.064679  |
| 7                | 1                | 0              | -2.424547               | 0.668428  | 0.091218  |
| 8                | 1                | 0              | 1.443299                | -2.359699 | -0.148756 |
| 9                | 1                | 0              | -0.817552               | -3.301061 | 0.005321  |
| 10               | 8                | 0              | -0.128784               | 1.878335  | -0.049286 |
| 11               | 6                | 0              | 2.228170                | 0.274503  | -0.173860 |
| 12               | 1                | 0              | 2.158785                | 1.188161  | -0.771518 |
| 13               | 6                | 0              | 3.258603                | -0.634510 | -0.841338 |
| 14               | 1                | 0              | 2.935086                | -0.950849 | -1.836226 |
| 15               | 1                | 0              | 4.208476                | -0.104489 | -0.949590 |
| 16               | 1                | 0              | 3.454082                | -1.532657 | -0.249400 |
| 17               | 6                | 0              | 2.714266                | 0.682208  | 1.223088  |
| 18               | 1                | 0              | 3.683737                | 1.186229  | 1.168228  |
| 19               | 1                | 0              | 2.009394                | 1.359018  | 1.710160  |
| 20               | 1                | 0              | 2.829898                | -0.200730 | 1.859172  |
| 21               | 6                | 0              | -3.183290               | -1.931286 | 0.174822  |
| 22               | 1                | 0              | -3.599752               | -1.754574 | 1.170834  |
| 23               | 1                | 0              | -3.856699               | -1.457405 | -0.543459 |
| 24               | 1                | 0              | -3.198169               | -3.007739 | -0.004472 |
| 25               | 8                | 0              | -2.118852               | 3.549618  | -0.171352 |
| 26               | 1                | 0              | -2.184873               | 3.820153  | -1.092708 |
| 27               | 1                | 0              | -1.379610               | 2.864871  | -0.142401 |

Rotational constants (GHZ):            0.9341078            0.6990864            0.4295606

- 1H<sub>2</sub>O/wB97XD 6-311G+dp/PCM

**H<sub>2</sub>O**

Electronic Energy -152.888235

Stoichiometry H4O2

Framework group C1[X(H4O2)]

Deg. of freedom 12

Full point group C1 NOp 1

Largest Abelian subgroup C1 NOp 1

Largest concise Abelian subgroup C1 NOp 1

Standard orientation:

| Center<br>Number | Atomic<br>Number | Atomic<br>Type | Coordinates (Angstroms) |           |          |
|------------------|------------------|----------------|-------------------------|-----------|----------|
|                  |                  |                | X                       | Y         | Z        |
| 1                | 8                | 0              | 1.334098                | -0.000066 | 0.089003 |

|   |   |   |           |           |           |
|---|---|---|-----------|-----------|-----------|
| 2 | 1 | 0 | 1.802929  | 0.766671  | -0.260945 |
| 3 | 1 | 0 | 1.805153  | -0.765474 | -0.260862 |
| 4 | 8 | 0 | -1.492632 | -0.000059 | -0.117740 |
| 5 | 1 | 0 | -1.818990 | 0.000437  | 0.788019  |
| 6 | 1 | 0 | -0.520820 | -0.000636 | -0.036318 |

Rotational constants (GHZ): 227.6237525 6.7080289 6.6950899

#### OH<sup>-</sup>

Electronic Energy -152.389464

Stoichiometry H3O2(1-)

Framework group C1[X(H3O2)]

Deg. of freedom 9

Full point group C1 NOp 1

Largest Abelian subgroup C1 NOp 1

Largest concise Abelian subgroup C1 NOp 1

Standard orientation:

| Center<br>Number | Atomic<br>Number | Atomic<br>Type | Coordinates (Angstroms) |           |           |
|------------------|------------------|----------------|-------------------------|-----------|-----------|
|                  |                  |                | X                       | Y         | Z         |
| 1                | 8                | 0              | 1.260773                | 0.034490  | -0.105350 |
| 2                | 1                | 0              | 1.669783                | -0.137266 | 0.749182  |
| 3                | 8                | 0              | -1.248911               | -0.110104 | -0.006106 |
| 4                | 1                | 0              | -1.570442               | 0.780839  | 0.161116  |
| 5                | 1                | 0              | -0.194238               | -0.038664 | -0.018653 |

Rotational constants (GHZ): 330.2884982 8.9463552 8.9345926

#### Phenol

Electronic Energy -383.904481

Stoichiometry C6H8O2

Framework group C1[X(C6H8O2)]

Deg. of freedom 42

Full point group C1 NOp 1

Largest Abelian subgroup C1 NOp 1

Largest concise Abelian subgroup C1 NOp 1

Standard orientation:

| Center<br>Number | Atomic<br>Number | Atomic<br>Type | Coordinates (Angstroms) |           |           |
|------------------|------------------|----------------|-------------------------|-----------|-----------|
|                  |                  |                | X                       | Y         | Z         |
| 1                | 6                | 0              | -2.302075               | -0.622886 | 0.000335  |
| 2                | 6                | 0              | -1.082491               | -1.283818 | 0.000134  |
| 3                | 6                | 0              | 0.104201                | -0.551461 | -0.000158 |
| 4                | 6                | 0              | 0.057285                | 0.843137  | -0.000245 |
| 5                | 6                | 0              | -1.171997               | 1.492388  | -0.000043 |
| 6                | 6                | 0              | -2.357823               | 0.768175  | 0.000248  |
| 7                | 1                | 0              | -3.219466               | -1.201619 | 0.000560  |
| 8                | 1                | 0              | -1.027758               | -2.366098 | 0.000197  |
| 9                | 1                | 0              | 0.982752                | 1.409687  | -0.000472 |
| 10               | 1                | 0              | -1.198347               | 2.576811  | -0.000115 |
| 11               | 1                | 0              | -3.313275               | 1.279279  | 0.000404  |
| 12               | 8                | 0              | 1.269651                | -1.240321 | -0.000345 |
| 13               | 1                | 0              | 2.021160                | -0.629151 | -0.000550 |
| 14               | 8                | 0              | 3.496479                | 0.498368  | 0.000044  |
| 15               | 1                | 0              | 4.071196                | 0.496314  | 0.767243  |
| 16               | 1                | 0              | 4.072101                | 0.497190  | -0.766476 |

Rotational constants (GHZ): 4.2663683 1.1330328 0.8990482

#### Phenolate

Electronic Energy -383.426196

Stoichiometry C6H7O2(1-)

Framework group C1[X(C6H7O2)]

Deg. of freedom 39

Full point group C1 NOp 1

Largest Abelian subgroup C1 NOp 1

Largest concise Abelian subgroup C1 NOp 1

Standard orientation:

| Center<br>Number            | Atomic<br>Number | Atomic<br>Type | Coordinates (Angstroms) |           |           |
|-----------------------------|------------------|----------------|-------------------------|-----------|-----------|
|                             |                  |                | X                       | Y         | Z         |
| 1                           | 6                | 0              | 2.190041                | -0.716806 | 0.140365  |
| 2                           | 6                | 0              | 0.939050                | -1.302597 | 0.045778  |
| 3                           | 6                | 0              | -0.256182               | -0.529409 | -0.111429 |
| 4                           | 6                | 0              | -0.051857               | 0.888103  | -0.168171 |
| 5                           | 6                | 0              | 1.208874                | 1.454243  | -0.072024 |
| 6                           | 6                | 0              | 2.354149                | 0.670076  | 0.085797  |
| 7                           | 1                | 0              | 3.064448                | -1.354595 | 0.259901  |
| 8                           | 1                | 0              | 0.828092                | -2.382609 | 0.089775  |
| 9                           | 1                | 0              | -0.928408               | 1.515873  | -0.304422 |
| 10                          | 1                | 0              | 1.305414                | 2.537506  | -0.123989 |
| 11                          | 1                | 0              | 3.337963                | 1.122108  | 0.160080  |
| 12                          | 8                | 0              | -1.409840               | -1.071090 | -0.192209 |
| 13                          | 8                | 0              | -3.566780               | 0.455057  | 0.130711  |
| 14                          | 1                | 0              | -3.308115               | 0.845870  | 0.964963  |
| 15                          | 1                | 0              | -2.790883               | -0.137553 | -0.076220 |
| Rotational constants (GHZ): |                  |                | 4.4720373               | 1.1643543 | 0.9337446 |

### Thymol

Electronic Energy -541.161108

Stoichiometry C10H16O2

Framework group C1[X(C10H16O2)]

Deg. of freedom 78

Full point group C1 NOp 1

Largest Abelian subgroup C1 NOp 1

Largest concise Abelian subgroup C1 NOp 1

Standard orientation:

| Center<br>Number            | Atomic<br>Number | Atomic<br>Type | Coordinates (Angstroms) |           |           |
|-----------------------------|------------------|----------------|-------------------------|-----------|-----------|
|                             |                  |                | X                       | Y         | Z         |
| 1                           | 6                | 0              | 1.514706                | -0.149226 | -0.007248 |
| 2                           | 6                | 0              | 0.277910                | 0.484582  | -0.100509 |
| 3                           | 6                | 0              | -0.915691               | -0.258198 | -0.120030 |
| 4                           | 6                | 0              | -0.802924               | -1.641815 | -0.035759 |
| 5                           | 6                | 0              | 0.431762                | -2.281292 | 0.062216  |
| 6                           | 6                | 0              | 1.608466                | -1.539067 | 0.075918  |
| 7                           | 1                | 0              | 2.415568                | 0.457808  | 0.001212  |
| 8                           | 1                | 0              | -1.701744               | -2.248566 | -0.048442 |
| 9                           | 1                | 0              | 0.473356                | -3.363812 | 0.125802  |
| 10                          | 8                | 0              | 0.181142                | 1.836575  | -0.177215 |
| 11                          | 1                | 0              | 1.066311                | 2.246778  | -0.170027 |
| 12                          | 6                | 0              | -2.249713               | 0.461974  | -0.185997 |
| 13                          | 1                | 0              | -2.106444               | 1.338829  | -0.825139 |
| 14                          | 6                | 0              | -2.651469               | 0.969033  | 1.207040  |
| 15                          | 1                | 0              | -1.874008               | 1.606800  | 1.633753  |
| 16                          | 1                | 0              | -3.579320               | 1.546908  | 1.155940  |
| 17                          | 1                | 0              | -2.813698               | 0.124964  | 1.885602  |
| 18                          | 6                | 0              | -3.373097               | -0.377775 | -0.795335 |
| 19                          | 1                | 0              | -4.266489               | 0.238567  | -0.927293 |
| 20                          | 1                | 0              | -3.090416               | -0.780640 | -1.771740 |
| 21                          | 1                | 0              | -3.649784               | -1.215898 | -0.148254 |
| 22                          | 6                | 0              | 2.958771                | -2.202487 | 0.165061  |
| 23                          | 1                | 0              | 3.525334                | -2.061568 | -0.760252 |
| 24                          | 1                | 0              | 3.553772                | -1.777873 | 0.978143  |
| 25                          | 1                | 0              | 2.860655                | -3.275751 | 0.339065  |
| 26                          | 8                | 0              | 2.650557                | 3.060399  | -0.156795 |
| 27                          | 1                | 0              | 2.827037                | 3.667526  | 0.566039  |
| 28                          | 1                | 0              | 2.913953                | 3.525767  | -0.954471 |
| Rotational constants (GHZ): |                  |                | 0.9677892               | 0.6719645 | 0.4248944 |

### Thymolate

Electronic Energy -540.680365

Stoichiometry C10H15O2(1-)

Framework group C1[X(C10H15O2)]



Deg. of freedom 75  
 Full point group C1 NOp 1  
 Largest Abelian subgroup C1 NOp 1  
 Largest concise Abelian subgroup C1 NOp 1  
 Standard orientation:

| Center<br>Number | Atomic<br>Number | Atomic<br>Type | Coordinates (Angstroms) |           |           |
|------------------|------------------|----------------|-------------------------|-----------|-----------|
|                  |                  |                | X                       | Y         | Z         |
| 1                | 6                | 0              | -2.230057               | 0.237290  | -0.194177 |
| 2                | 1                | 0              | -2.149248               | 1.136728  | -0.816002 |
| 3                | 6                | 0              | -0.831493               | -0.337791 | -0.112221 |
| 4                | 6                | 0              | -0.562082               | -1.695453 | -0.142583 |
| 5                | 6                | 0              | 0.250801                | 0.603149  | 0.035073  |
| 6                | 6                | 0              | 0.735453                | -2.207352 | -0.037395 |
| 7                | 1                | 0              | -1.384165               | -2.399318 | -0.253374 |
| 8                | 6                | 0              | 1.558401                | 0.045685  | 0.137879  |
| 9                | 6                | 0              | 1.803354                | -1.320867 | 0.103021  |
| 10               | 1                | 0              | 0.907268                | -3.280024 | -0.063958 |
| 11               | 1                | 0              | 2.383398                | 0.743234  | 0.266420  |
| 12               | 6                | 0              | -2.703105               | 0.705170  | 1.189694  |
| 13               | 1                | 0              | -3.681481               | 1.199271  | 1.129123  |
| 14               | 1                | 0              | -2.791608               | -0.149965 | 1.870637  |
| 15               | 1                | 0              | -1.980871               | 1.412021  | 1.602333  |
| 16               | 6                | 0              | -3.262467               | -0.697059 | -0.825498 |
| 17               | 1                | 0              | -4.218318               | -0.176511 | -0.953535 |
| 18               | 1                | 0              | -2.932241               | -1.054122 | -1.805937 |
| 19               | 1                | 0              | -3.452411               | -1.574072 | -0.195464 |
| 20               | 6                | 0              | 3.221302                | -1.837449 | 0.183374  |
| 21               | 1                | 0              | 3.704633                | -1.818824 | -0.800604 |
| 22               | 1                | 0              | 3.828384                | -1.224956 | 0.856703  |
| 23               | 1                | 0              | 3.248119                | -2.870413 | 0.544555  |
| 24               | 8                | 0              | 0.031672                | 1.864921  | 0.070333  |
| 25               | 8                | 0              | 2.082391                | 3.516736  | -0.341467 |
| 26               | 1                | 0              | 2.423189                | 3.089918  | -1.127183 |
| 27               | 1                | 0              | 1.302217                | 2.941846  | -0.107645 |

Rotational constants (GHZ): 0.9588905 0.6972141 0.4343389

## - 1H<sub>2</sub>O/wB97XD 6-311G+dp/CPCM

### H<sub>2</sub>O

Electronic Energy -152.887822  
 Stoichiometry H4O2  
 Framework group CS[SG(H4O2)]  
 Deg. of freedom 9  
 Full point group CS NOp 2  
 Largest Abelian subgroup CS NOp 2  
 Largest concise Abelian subgroup C1 NOp 1  
 Standard orientation:

| Center<br>Number | Atomic<br>Number | Atomic<br>Type | Coordinates (Angstroms) |           |          |
|------------------|------------------|----------------|-------------------------|-----------|----------|
|                  |                  |                | X                       | Y         | Z        |
| 1                | 8                | 0              | 0.045614                | -1.308741 | 0.000000 |
| 2                | 1                | 0              | 0.836597                | -1.857058 | 0.000000 |
| 3                | 1                | 0              | -0.701851               | -1.915030 | 0.000000 |
| 4                | 8                | 0              | 0.045614                | 1.491933  | 0.000000 |
| 5                | 1                | 0              | 0.004654                | 0.519625  | 0.000000 |
| 6                | 1                | 0              | -0.869217               | 1.786931  | 0.000000 |

Rotational constants (GHZ): 255.7078622 6.8627524 6.6833821

### OH-

Electronic Energy -152.389566  
 Stoichiometry H3O2(1-)  
 Framework group C1[X(H3O2)]  
 Deg. of freedom 9  
 Full point group C1 NOp 1  
 Largest Abelian subgroup C1 NOp 1

Largest concise Abelian subgroup C1 NOp 1  
Standard orientation:

| Center<br>Number | Atomic<br>Number | Atomic<br>Type | Coordinates (Angstroms) |           |           |
|------------------|------------------|----------------|-------------------------|-----------|-----------|
|                  |                  |                | X                       | Y         | Z         |
| 1                | 8                | 0              | -1.240695               | -0.108949 | 0.014236  |
| 2                | 1                | 0              | -0.186191               | -0.042084 | -0.010759 |
| 3                | 1                | 0              | -1.567950               | 0.793657  | 0.018536  |
| 4                | 8                | 0              | 1.250371                | 0.013500  | -0.109165 |
| 5                | 1                | 0              | 1.676734                | 0.012019  | 0.751656  |

Rotational constants (GHZ): 335.5191073 9.0657237 9.0541656

### Phenol

Electronic Energy -383.904553

Stoichiometry C6H8O2

Framework group C1[X(C6H8O2)]

Deg. of freedom 42

Full point group C1 NOp 1

Largest Abelian subgroup C1 NOp 1

Largest concise Abelian subgroup C1 NOp 1

Standard orientation:

| Center<br>Number | Atomic<br>Number | Atomic<br>Type | Coordinates (Angstroms) |           |           |
|------------------|------------------|----------------|-------------------------|-----------|-----------|
|                  |                  |                | X                       | Y         | Z         |
| 1                | 6                | 0              | 0.048190                | 0.857740  | -0.006678 |
| 2                | 6                | 0              | 0.118916                | -0.534356 | -0.002806 |
| 3                | 6                | 0              | -1.053405               | -1.287215 | 0.002851  |
| 4                | 6                | 0              | -2.284984               | -0.649278 | 0.005110  |
| 5                | 6                | 0              | -2.364579               | 0.739516  | 0.001733  |
| 6                | 6                | 0              | -1.191766               | 1.484256  | -0.004279 |
| 7                | 1                | 0              | 0.962674                | 1.439096  | -0.011980 |
| 8                | 1                | 0              | -3.190934               | -1.244205 | 0.009705  |
| 9                | 1                | 0              | -3.328117               | 1.233654  | 0.003675  |
| 10               | 8                | 0              | 1.300591                | -1.201483 | -0.004606 |
| 11               | 1                | 0              | 2.058774                | -0.581514 | -0.004040 |
| 12               | 8                | 0              | 3.451997                | 0.488121  | -0.000264 |
| 13               | 1                | 0              | 4.077665                | 0.444823  | -0.731698 |
| 14               | 1                | 0              | 3.985826                | 0.552266  | 0.799253  |
| 15               | 1                | 0              | -1.236963               | 2.567188  | -0.007181 |
| 16               | 1                | 0              | -0.983851               | -2.368386 | 0.005640  |

Rotational constants (GHZ): 4.3366538 1.1458627 0.9102438

### Phenolate

Electronic Energy -383.426346

Stoichiometry C6H7O2(1-)

Framework group C1[X(C6H7O2)]

Deg. of freedom 39

Full point group C1 NOp 1

Largest Abelian subgroup C1 NOp 1

Largest concise Abelian subgroup C1 NOp 1

Standard orientation:

| Center<br>Number | Atomic<br>Number | Atomic<br>Type | Coordinates (Angstroms) |           |           |
|------------------|------------------|----------------|-------------------------|-----------|-----------|
|                  |                  |                | X                       | Y         | Z         |
| 1                | 6                | 0              | -0.004843               | 0.922468  | 0.021875  |
| 2                | 6                | 0              | -0.239972               | -0.478356 | 0.024192  |
| 3                | 6                | 0              | 0.917886                | -1.299790 | 0.002271  |
| 4                | 6                | 0              | 2.194967                | -0.762206 | -0.018937 |
| 5                | 6                | 0              | 2.397916                | 0.616859  | -0.020528 |
| 6                | 6                | 0              | 1.278616                | 1.446366  | 0.000255  |
| 7                | 1                | 0              | -0.863120               | 1.586523  | 0.037821  |
| 8                | 1                | 0              | 3.050092                | -1.431159 | -0.034970 |
| 9                | 1                | 0              | 3.398221                | 1.032200  | -0.037043 |
| 10               | 8                | 0              | -1.435759               | -0.985532 | 0.045664  |
| 11               | 8                | 0              | -3.639269               | 0.376019  | -0.122028 |
| 12               | 1                | 0              | -3.680028               | 0.974916  | 0.627792  |
| 13               | 1                | 0              | -2.757968               | -0.106737 | -0.040239 |

|    |   |   |          |           |           |
|----|---|---|----------|-----------|-----------|
| 14 | 1 | 0 | 1.408922 | 2.524355  | -0.000246 |
| 15 | 1 | 0 | 0.776682 | -2.376039 | 0.003026  |

Rotational constants (GHZ): 4.7222127 1.1269445 0.9120381

### Thymol

Electronic Energy -541.161186

Stoichiometry C10H16O2

Framework group C1[X(C10H16O2)]

Deg. of freedom 78

Full point group C1 NOp 1

Largest Abelian subgroup C1 NOp 1

Largest concise Abelian subgroup C1 NOp 1

Standard orientation:

| Center<br>Number | Atomic<br>Number | Atomic<br>Type | Coordinates (Angstroms) |           |           |
|------------------|------------------|----------------|-------------------------|-----------|-----------|
|                  |                  |                | X                       | Y         | Z         |
| 1                | 6                | 0              | 1.516139                | -0.153903 | -0.004064 |
| 2                | 6                | 0              | 0.279843                | 0.475766  | -0.095003 |
| 3                | 6                | 0              | -0.911743               | -0.266261 | -0.114725 |
| 4                | 6                | 0              | -0.795832               | -1.648069 | -0.035164 |
| 5                | 6                | 0              | 0.439025                | -2.284437 | 0.060893  |
| 6                | 6                | 0              | 1.613289                | -1.541996 | 0.075957  |
| 7                | 1                | 0              | 2.413616                | 0.456249  | 0.004551  |
| 8                | 1                | 0              | -1.692241               | -2.256102 | -0.050591 |
| 9                | 1                | 0              | 0.482875                | -3.366063 | 0.121393  |
| 10               | 8                | 0              | 0.182496                | 1.830779  | -0.169826 |
| 11               | 1                | 0              | 1.066677                | 2.249257  | -0.167270 |
| 12               | 6                | 0              | -2.245166               | 0.453328  | -0.186535 |
| 13               | 1                | 0              | -2.098398               | 1.324411  | -0.830816 |
| 14               | 6                | 0              | -2.653670               | 0.974256  | 1.198134  |
| 15               | 1                | 0              | -1.877933               | 1.612036  | 1.624642  |
| 16               | 1                | 0              | -3.577131               | 1.556125  | 1.135330  |
| 17               | 1                | 0              | -2.826201               | 0.140285  | 1.884547  |
| 18               | 6                | 0              | -3.366956               | -0.388129 | -0.793308 |
| 19               | 1                | 0              | -4.262807               | 0.224057  | -0.919515 |
| 20               | 1                | 0              | -3.089027               | -0.785971 | -1.771917 |
| 21               | 1                | 0              | -3.637566               | -1.229421 | -0.150184 |
| 22               | 6                | 0              | 2.962499                | -2.205039 | 0.164483  |
| 23               | 1                | 0              | 3.536398                | -2.053584 | -0.753524 |
| 24               | 1                | 0              | 3.553017                | -1.793104 | 0.986093  |
| 25               | 1                | 0              | 2.863443                | -3.279393 | 0.323761  |
| 26               | 8                | 0              | 2.618670                | 3.100304  | -0.162901 |
| 27               | 1                | 0              | 2.810663                | 3.702465  | 0.564266  |
| 28               | 1                | 0              | 2.900721                | 3.556999  | -0.962962 |

Rotational constants (GHZ): 0.9594052 0.6751345 0.4242316

### Thymolate

Electronic Energy -540.680535

Stoichiometry C10H15O2(1-)

Framework group C1[X(C10H15O2)]

Deg. of freedom 75

Full point group C1 NOp 1

Largest Abelian subgroup C1 NOp 1

Largest concise Abelian subgroup C1 NOp 1

Standard orientation:

| Center<br>Number | Atomic<br>Number | Atomic<br>Type | Coordinates (Angstroms) |           |           |
|------------------|------------------|----------------|-------------------------|-----------|-----------|
|                  |                  |                | X                       | Y         | Z         |
| 1                | 6                | 0              | -1.579970               | 0.004228  | -0.012171 |
| 2                | 6                | 0              | -0.288640               | 0.580797  | -0.084031 |
| 3                | 6                | 0              | 0.825182                | -0.318299 | -0.101460 |
| 4                | 6                | 0              | 0.588007                | -1.682624 | -0.042080 |
| 5                | 6                | 0              | -0.697519               | -2.221913 | 0.035633  |
| 6                | 6                | 0              | -1.797087               | -1.367978 | 0.053318  |
| 7                | 1                | 0              | -2.430673               | 0.680543  | -0.006626 |
| 8                | 1                | 0              | 1.431083                | -2.366052 | -0.061198 |
| 9                | 1                | 0              | -0.837125               | -3.296833 | 0.076744  |
| 10               | 8                | 0              | -0.118411               | 1.870167  | -0.138456 |

|    |   |   |           |           |           |
|----|---|---|-----------|-----------|-----------|
| 11 | 6 | 0 | 2.223536  | 0.263684  | -0.155490 |
| 12 | 1 | 0 | 2.137864  | 1.206336  | -0.702541 |
| 13 | 6 | 0 | 3.240522  | -0.615678 | -0.883836 |
| 14 | 1 | 0 | 2.898163  | -0.878594 | -1.887709 |
| 15 | 1 | 0 | 4.194399  | -0.090039 | -0.979190 |
| 16 | 1 | 0 | 3.437343  | -1.545390 | -0.342952 |
| 17 | 6 | 0 | 2.730447  | 0.607036  | 1.251744  |
| 18 | 1 | 0 | 3.700786  | 1.111374  | 1.209722  |
| 19 | 1 | 0 | 2.028860  | 1.262583  | 1.770585  |
| 20 | 1 | 0 | 2.850129  | -0.302587 | 1.848473  |
| 21 | 6 | 0 | -3.199524 | -1.912865 | 0.164646  |
| 22 | 1 | 0 | -3.579561 | -1.818828 | 1.186442  |
| 23 | 1 | 0 | -3.890854 | -1.373302 | -0.486583 |
| 24 | 1 | 0 | -3.236265 | -2.970594 | -0.102498 |
| 25 | 8 | 0 | -2.010814 | 3.633496  | -0.103881 |
| 26 | 1 | 0 | -2.627788 | 3.430892  | -0.811622 |
| 27 | 1 | 0 | -1.312293 | 2.902864  | -0.130000 |

## - 1H<sub>2</sub>O/CAM-B3LYP 6-311G+dp/SMD

### H<sub>2</sub>O

Electronic Energy -152.948642

Stoichiometry H<sub>4</sub>O<sub>2</sub>

Framework group C1[X(H<sub>4</sub>O<sub>2</sub>)]

Deg. of freedom 12

Full point group C1 NOp 1

Largest Abelian subgroup C1 NOp 1

Largest concise Abelian subgroup C1 NOp 1

Standard orientation:

| Center<br>Number | Atomic<br>Number | Atomic<br>Type | Coordinates (Angstroms) |           |           |
|------------------|------------------|----------------|-------------------------|-----------|-----------|
|                  |                  |                | X                       | Y         | Z         |
| 1                | 8                | 0              | 1.354996                | -0.000069 | 0.095350  |
| 2                | 1                | 0              | 1.785425                | 0.769030  | -0.288545 |
| 3                | 1                | 0              | 1.787533                | -0.767656 | -0.289197 |
| 4                | 8                | 0              | -1.498925               | 0.000064  | -0.119702 |
| 5                | 1                | 0              | -1.882099               | 0.000036  | 0.759773  |
| 6                | 1                | 0              | -0.539428               | -0.001371 | 0.012785  |

Rotational constants (GHZ): 226.2594154 6.5900974 6.5775524

### OH<sup>-</sup>

Electronic Energy -152.462455

Stoichiometry H<sub>3</sub>O<sub>2</sub>(1-)

Framework group C1[X(H<sub>3</sub>O<sub>2</sub>)]

Deg. of freedom 9

Full point group C1 NOp 1

Largest Abelian subgroup C1 NOp 1

Largest concise Abelian subgroup C1 NOp 1

Standard orientation:

| Center<br>Number | Atomic<br>Number | Atomic<br>Type | Coordinates (Angstroms) |           |           |
|------------------|------------------|----------------|-------------------------|-----------|-----------|
|                  |                  |                | X                       | Y         | Z         |
| 1                | 8                | 0              | 1.286943                | 0.084111  | -0.074999 |
| 2                | 1                | 0              | 1.649047                | -0.511239 | 0.590619  |
| 3                | 8                | 0              | -1.265979               | -0.096278 | -0.055426 |
| 4                | 1                | 0              | -1.583273               | 0.634103  | 0.487062  |
| 5                | 1                | 0              | -0.233481               | -0.025523 | -0.034279 |

Rotational constants (GHZ): 321.6601960 8.6825052 8.6569125

### Phenol

Electronic Energy -383.856631

Stoichiometry C<sub>6</sub>H<sub>8</sub>O<sub>2</sub>

Framework group C1[X(C<sub>6</sub>H<sub>8</sub>O<sub>2</sub>)]

Deg. of freedom 42

Full point group C1 NOp 1  
 Largest Abelian subgroup C1 NOp 1  
 Largest concise Abelian subgroup C1 NOp 1  
 Standard orientation:

| Center<br>Number | Atomic<br>Number | Atomic<br>Type | Coordinates (Angstroms) |           |           |
|------------------|------------------|----------------|-------------------------|-----------|-----------|
|                  |                  |                | X                       | Y         | Z         |
| 1                | 6                | 0              | 0.000762                | 0.891143  | 0.001746  |
| 2                | 6                | 0              | 0.117993                | -0.496199 | 0.005679  |
| 3                | 6                | 0              | -1.023895               | -1.292530 | 0.003289  |
| 4                | 6                | 0              | -2.277735               | -0.698911 | -0.002436 |
| 5                | 6                | 0              | -2.405945               | 0.686156  | -0.006136 |
| 6                | 6                | 0              | -1.260849               | 1.473063  | -0.004055 |
| 7                | 1                | 0              | 0.892903                | 1.506109  | 0.003079  |
| 8                | 1                | 0              | -3.161897               | -1.325828 | -0.004248 |
| 9                | 1                | 0              | -3.386658               | 1.145616  | -0.010633 |
| 10               | 8                | 0              | 1.331806                | -1.125248 | 0.012348  |
| 11               | 1                | 0              | 2.075401                | -0.480402 | 0.005527  |
| 12               | 8                | 0              | 3.518483                | 0.492134  | -0.033283 |
| 13               | 1                | 0              | 4.175614                | 0.124055  | -0.636968 |
| 14               | 1                | 0              | 3.961400                | 0.536118  | 0.823222  |
| 15               | 1                | 0              | -1.344687               | 2.553692  | -0.006907 |
| 16               | 1                | 0              | -0.916373               | -2.370780 | 0.005891  |

Rotational constants (GHZ): 4.4550873 1.1135613 0.8943871

#### Phenolate

Electronic Energy -383.386583  
 Stoichiometry C6H7O2(1-)  
 Framework group C1[X(C6H7O2)]  
 Deg. of freedom 39  
 Full point group C1 NOp 1  
 Largest Abelian subgroup C1 NOp 1  
 Largest concise Abelian subgroup C1 NOp 1  
 Standard orientation:

| Center<br>Number | Atomic<br>Number | Atomic<br>Type | Coordinates (Angstroms) |           |           |
|------------------|------------------|----------------|-------------------------|-----------|-----------|
|                  |                  |                | X                       | Y         | Z         |
| 1                | 6                | 0              | -0.013052               | 0.914708  | -0.040474 |
| 2                | 6                | 0              | -0.228561               | -0.483276 | -0.030988 |
| 3                | 6                | 0              | 0.925250                | -1.299963 | 0.008502  |
| 4                | 6                | 0              | 2.199333                | -0.753455 | 0.037758  |
| 5                | 6                | 0              | 2.389484                | 0.626336  | 0.028802  |
| 6                | 6                | 0              | 1.266612                | 1.449092  | -0.010624 |
| 7                | 1                | 0              | -0.876279               | 1.570981  | -0.072233 |
| 8                | 1                | 0              | 3.058722                | -1.415614 | 0.068087  |
| 9                | 1                | 0              | 3.386592                | 1.048991  | 0.052078  |
| 10               | 8                | 0              | -1.435476               | -1.004689 | -0.058785 |
| 11               | 8                | 0              | -3.595381               | 0.462367  | -0.041306 |
| 12               | 1                | 0              | -3.996254               | 0.331757  | 0.823968  |
| 13               | 1                | 0              | -2.741546               | -0.068583 | -0.026226 |
| 14               | 1                | 0              | 1.389348                | 2.527439  | -0.018933 |
| 15               | 1                | 0              | 0.791876                | -2.377050 | 0.016133  |

Rotational constants (GHZ): 4.6770234 1.1349725 0.9160416

#### Thymol

Electronic Energy -541.055716  
 Stoichiometry C10H16O2  
 Framework group C1[X(C10H16O2)]  
 Deg. of freedom 78  
 Full point group C1 NOp 1  
 Largest Abelian subgroup C1 NOp 1  
 Largest concise Abelian subgroup C1 NOp 1  
 Standard orientation:

| Center<br>Number | Atomic<br>Number | Atomic<br>Type | Coordinates (Angstroms) |           |          |
|------------------|------------------|----------------|-------------------------|-----------|----------|
|                  |                  |                | X                       | Y         | Z        |
| 1                | 6                | 0              | 1.529590                | -0.172414 | 0.004903 |

|    |   |   |           |           |           |
|----|---|---|-----------|-----------|-----------|
| 2  | 6 | 0 | 0.296197  | 0.461624  | -0.083415 |
| 3  | 6 | 0 | -0.899135 | -0.272445 | -0.113123 |
| 4  | 6 | 0 | -0.789493 | -1.656185 | -0.040685 |
| 5  | 6 | 0 | 0.442036  | -2.298182 | 0.054712  |
| 6  | 6 | 0 | 1.620468  | -1.561330 | 0.075766  |
| 7  | 1 | 0 | 2.430896  | 0.431300  | 0.020466  |
| 8  | 1 | 0 | -1.688897 | -2.259727 | -0.060229 |
| 9  | 1 | 0 | 0.482024  | -3.380314 | 0.110309  |
| 10 | 8 | 0 | 0.208465  | 1.826618  | -0.145735 |
| 11 | 1 | 0 | 1.097135  | 2.245634  | -0.140078 |
| 12 | 6 | 0 | -2.232878 | 0.447369  | -0.183926 |
| 13 | 1 | 0 | -2.086837 | 1.329643  | -0.812635 |
| 14 | 6 | 0 | -2.657137 | 0.937784  | 1.206034  |
| 15 | 1 | 0 | -1.891769 | 1.569691  | 1.660835  |
| 16 | 1 | 0 | -3.581944 | 1.517777  | 1.144179  |
| 17 | 1 | 0 | -2.835318 | 0.088669  | 1.872278  |
| 18 | 6 | 0 | -3.346561 | -0.385913 | -0.814273 |
| 19 | 1 | 0 | -4.241974 | 0.228107  | -0.936848 |
| 20 | 1 | 0 | -3.060473 | -0.764596 | -1.798466 |
| 21 | 1 | 0 | -3.620073 | -1.239297 | -0.188710 |
| 22 | 6 | 0 | 2.965153  | -2.230897 | 0.156717  |
| 23 | 1 | 0 | 3.510617  | -2.129723 | -0.785686 |
| 24 | 1 | 0 | 3.584096  | -1.783367 | 0.937693  |
| 25 | 1 | 0 | 2.861754  | -3.295610 | 0.370414  |
| 26 | 8 | 0 | 2.570413  | 3.205243  | -0.164455 |
| 27 | 1 | 0 | 2.571173  | 3.893423  | 0.512434  |
| 28 | 1 | 0 | 2.669118  | 3.677038  | -1.000703 |

Rotational constants (GHZ): 0.9316196 0.6818526 0.4217409

#### Thymolate

Electronic Energy -540.583746

Stoichiometry C10H15O2(1-)

Framework group C1[X(C10H15O2)]

Deg. of freedom 75

Full point group C1 NOp 1

Largest Abelian subgroup C1 NOp 1

Largest concise Abelian subgroup C1 NOp 1

Standard orientation:

| Center<br>Number | Atomic<br>Number | Atomic<br>Type | Coordinates (Angstroms) |           |           |
|------------------|------------------|----------------|-------------------------|-----------|-----------|
|                  |                  |                | X                       | Y         | Z         |
| 1                | 6                | 0              | -1.572919               | -0.004228 | 0.042850  |
| 2                | 6                | 0              | -0.287717               | 0.570611  | -0.037248 |
| 3                | 6                | 0              | 0.830926                | -0.312396 | -0.109413 |
| 4                | 6                | 0              | 0.599679                | -1.680433 | -0.090243 |
| 5                | 6                | 0              | -0.682281               | -2.224992 | -0.003555 |
| 6                | 6                | 0              | -1.785515               | -1.379691 | 0.064679  |
| 7                | 1                | 0              | -2.424547               | 0.668428  | 0.091218  |
| 8                | 1                | 0              | 1.443299                | -2.359699 | -0.148756 |
| 9                | 1                | 0              | -0.817552               | -3.301061 | 0.005321  |
| 10               | 8                | 0              | -0.128784               | 1.878335  | -0.049286 |
| 11               | 6                | 0              | 2.228170                | 0.274503  | -0.173860 |
| 12               | 1                | 0              | 2.158785                | 1.188161  | -0.771518 |
| 13               | 6                | 0              | 3.258603                | -0.634510 | -0.841338 |
| 14               | 1                | 0              | 2.935086                | -0.950849 | -1.836226 |
| 15               | 1                | 0              | 4.208476                | -0.104489 | -0.949590 |
| 16               | 1                | 0              | 3.454082                | -1.532657 | -0.249400 |
| 17               | 6                | 0              | 2.714266                | 0.682208  | 1.223088  |
| 18               | 1                | 0              | 3.683737                | 1.186229  | 1.168228  |
| 19               | 1                | 0              | 2.009394                | 1.359018  | 1.710160  |
| 20               | 1                | 0              | 2.829898                | -0.200730 | 1.859172  |
| 21               | 6                | 0              | -3.183290               | -1.931286 | 0.174822  |
| 22               | 1                | 0              | -3.599752               | -1.754574 | 1.170834  |
| 23               | 1                | 0              | -3.856699               | -1.457405 | -0.543459 |
| 24               | 1                | 0              | -3.198169               | -3.007739 | -0.004472 |
| 25               | 8                | 0              | -2.118852               | 3.549618  | -0.171352 |
| 26               | 1                | 0              | -2.184873               | 3.820153  | -1.092708 |
| 27               | 1                | 0              | -1.379610               | 2.864871  | -0.142401 |

Rotational constants (GHZ): 0.9341078 0.6990864 0.4295606

**Carvacrol**

Electronic Energy -541.055871

Stoichiometry C<sub>10</sub>H<sub>16</sub>O<sub>2</sub>Framework group C1[X(C<sub>10</sub>H<sub>16</sub>O<sub>2</sub>)]

Deg. of freedom 78

Full point group C<sub>1</sub> NOp 1Largest Abelian subgroup C<sub>1</sub> NOp 1Largest concise Abelian subgroup C<sub>1</sub> NOp 1

Standard orientation:

| Center<br>Number | Atomic<br>Number | Atomic<br>Type | Coordinates (Angstroms) |           |           |
|------------------|------------------|----------------|-------------------------|-----------|-----------|
|                  |                  |                | X                       | Y         | Z         |
| 1                | 6                | 0              | 1.213603                | 0.951319  | -0.002658 |
| 2                | 6                | 0              | 0.990774                | -0.427489 | -0.022962 |
| 3                | 6                | 0              | -0.302571               | -0.943528 | -0.024318 |
| 4                | 6                | 0              | -1.414906               | -0.111772 | -0.004329 |
| 5                | 6                | 0              | -1.202776               | 1.267136  | 0.017793  |
| 6                | 6                | 0              | 0.087949                | 1.774411  | 0.017889  |
| 7                | 1                | 0              | -2.045014               | 1.949058  | 0.034082  |
| 8                | 8                | 0              | 2.007014                | -1.349413 | -0.043286 |
| 9                | 1                | 0              | 2.908509                | -0.966997 | -0.038436 |
| 10               | 8                | 0              | 4.723957                | -0.954610 | -0.064033 |
| 11               | 1                | 0              | 5.101324                | -1.658499 | 0.477464  |
| 12               | 1                | 0              | 5.070672                | -0.135995 | 0.310954  |
| 13               | 1                | 0              | -0.426307               | -2.021160 | -0.041831 |
| 14               | 1                | 0              | 0.238710                | 2.848827  | 0.033734  |
| 15               | 6                | 0              | 2.599241                | 1.533289  | -0.002870 |
| 16               | 1                | 0              | 3.166399                | 1.227088  | 0.880713  |
| 17               | 1                | 0              | 3.170655                | 1.216668  | -0.879748 |
| 18               | 1                | 0              | 2.551207                | 2.622301  | -0.009005 |
| 19               | 6                | 0              | -2.812878               | -0.699079 | -0.005497 |
| 20               | 1                | 0              | -2.702050               | -1.786794 | -0.036680 |
| 21               | 6                | 0              | -3.604519               | -0.272305 | -1.244095 |
| 22               | 1                | 0              | -3.082944               | -0.547752 | -2.163839 |
| 23               | 1                | 0              | -4.586038               | -0.753376 | -1.254044 |
| 24               | 1                | 0              | -3.762519               | 0.809399  | -1.256004 |
| 25               | 6                | 0              | -3.575410               | -0.341704 | 1.272838  |
| 26               | 1                | 0              | -4.557914               | -0.820879 | 1.277980  |
| 27               | 1                | 0              | -3.034036               | -0.669359 | 2.163563  |
| 28               | 1                | 0              | -3.729461               | 0.737991  | 1.348908  |

Rotational constants (GHZ): 1.9958574 0.4131278 0.3704264

**Carvacrolate**

Electronic Energy -540.585297

Stoichiometry C<sub>10</sub>H<sub>15</sub>O<sub>2</sub>(1-)Framework group C1[X(C<sub>10</sub>H<sub>15</sub>O<sub>2</sub>)]

Deg. of freedom 75

Full point group C<sub>1</sub> NOp 1Largest Abelian subgroup C<sub>1</sub> NOp 1Largest concise Abelian subgroup C<sub>1</sub> NOp 1

Standard orientation:

| Center<br>Number | Atomic<br>Number | Atomic<br>Type | Coordinates (Angstroms) |           |           |
|------------------|------------------|----------------|-------------------------|-----------|-----------|
|                  |                  |                | X                       | Y         | Z         |
| 1                | 6                | 0              | -1.299715               | 1.094494  | -0.029167 |
| 2                | 6                | 0              | -1.142101               | -0.232042 | -0.507320 |
| 3                | 6                | 0              | 0.160418                | -0.775560 | -0.509258 |
| 4                | 6                | 0              | 1.275011                | -0.071171 | -0.067159 |
| 5                | 6                | 0              | 1.096914                | 1.231727  | 0.400358  |
| 6                | 6                | 0              | -0.178747               | 1.788982  | 0.410194  |
| 7                | 1                | 0              | 1.941945                | 1.811842  | 0.753373  |
| 8                | 8                | 0              | -2.172683               | -0.933952 | -0.941275 |
| 9                | 8                | 0              | -4.113905               | -1.586468 | 0.694138  |
| 10               | 1                | 0              | -3.944694               | -2.507541 | 0.916875  |
| 11               | 1                | 0              | -3.361765               | -1.316859 | 0.089777  |
| 12               | 1                | 0              | -0.308929               | 2.805050  | 0.772541  |
| 13               | 1                | 0              | 0.280563                | -1.790863 | -0.877568 |
| 14               | 6                | 0              | -2.663611               | 1.725374  | -0.017027 |
| 15               | 1                | 0              | -3.108075               | 1.740651  | -1.017047 |

|    |   |   |           |           |           |
|----|---|---|-----------|-----------|-----------|
| 16 | 1 | 0 | -3.359733 | 1.176980  | 0.624201  |
| 17 | 1 | 0 | -2.612005 | 2.753860  | 0.345226  |
| 18 | 6 | 0 | 2.648140  | -0.718647 | -0.093445 |
| 19 | 1 | 0 | 2.521685  | -1.717710 | -0.521395 |
| 20 | 6 | 0 | 3.626184  | 0.050251  | -0.985405 |
| 21 | 1 | 0 | 3.811520  | 1.053405  | -0.592275 |
| 22 | 1 | 0 | 4.586687  | -0.469537 | -1.039022 |
| 23 | 1 | 0 | 3.240248  | 0.153001  | -2.002591 |
| 24 | 6 | 0 | 3.224249  | -0.884811 | 1.315340  |
| 25 | 1 | 0 | 2.550765  | -1.460849 | 1.954676  |
| 26 | 1 | 0 | 4.184583  | -1.406496 | 1.279026  |
| 27 | 1 | 0 | 3.389464  | 0.086845  | 1.788629  |

Rotational constants (GHZ):      1.6257901      0.4597504      0.4064813

### 2,3-dimethylphenol

Electronic Energy -462.456624

Stoichiometry C8H12O2

Framework group C1[X(C8H12O2)]

Deg. of freedom 60

Full point group C1 NOp 1

Largest Abelian subgroup C1 NOp 1

Largest concise Abelian subgroup C1 NOp 1

Standard orientation:

| Center<br>Number | Atomic<br>Number | Atomic<br>Type | Coordinates (Angstroms) |           |           |
|------------------|------------------|----------------|-------------------------|-----------|-----------|
|                  |                  |                | X                       | Y         | Z         |
| 1                | 6                | 0              | -0.134344               | 0.442886  | 0.037416  |
| 2                | 6                | 0              | 0.290758                | -0.890372 | 0.039445  |
| 3                | 6                | 0              | -0.618009               | -1.942842 | 0.008611  |
| 4                | 6                | 0              | -1.974519               | -1.672870 | -0.032874 |
| 5                | 6                | 0              | -2.418779               | -0.357742 | -0.045642 |
| 6                | 6                | 0              | -1.513855               | 0.702054  | -0.011623 |
| 7                | 1                | 0              | -3.480942               | -0.144832 | -0.082076 |
| 8                | 8                | 0              | 1.615765                | -1.246085 | 0.082822  |
| 9                | 1                | 0              | 2.247037                | -0.502723 | 0.004377  |
| 10               | 8                | 0              | 3.871202                | 0.310911  | -0.191701 |
| 11               | 1                | 0              | 4.590945                | -0.208492 | 0.186873  |
| 12               | 1                | 0              | 3.884841                | 1.146876  | 0.289708  |
| 13               | 1                | 0              | -2.686640               | -2.489508 | -0.058200 |
| 14               | 1                | 0              | -0.244227               | -2.959776 | 0.014577  |
| 15               | 6                | 0              | 0.883863                | 1.549902  | 0.084309  |
| 16               | 1                | 0              | 1.577564                | 1.413734  | 0.918233  |
| 17               | 1                | 0              | 1.481936                | 1.580259  | -0.831240 |
| 18               | 1                | 0              | 0.415997                | 2.523868  | 0.203589  |
| 19               | 6                | 0              | -2.039399               | 2.113999  | -0.026842 |
| 20               | 1                | 0              | -1.753945               | 2.660657  | 0.875583  |
| 21               | 1                | 0              | -1.654585               | 2.678573  | -0.879677 |
| 22               | 1                | 0              | -3.128003               | 2.112660  | -0.087514 |

Rotational constants (GHZ):      1.9644230      0.8760485      0.6119151

### 2,3-dimethylphenolate

Electronic Energy -461.986350

Stoichiometry C8H11O2(1-)

Framework group C1[X(C8H11O2)]

Deg. of freedom 57

Full point group C1 NOp 1

Largest Abelian subgroup C1 NOp 1

Largest concise Abelian subgroup C1 NOp 1

Standard orientation:

| Center<br>Number | Atomic<br>Number | Atomic<br>Type | Coordinates (Angstroms) |           |           |
|------------------|------------------|----------------|-------------------------|-----------|-----------|
|                  |                  |                | X                       | Y         | Z         |
| 1                | 6                | 0              | -0.153722               | 0.494229  | 0.255295  |
| 2                | 6                | 0              | 0.531760                | -0.748354 | 0.352242  |
| 3                | 6                | 0              | -0.206619               | -1.928987 | 0.123132  |
| 4                | 6                | 0              | -1.549573               | -1.885259 | -0.210201 |
| 5                | 6                | 0              | -2.204616               | -0.664995 | -0.326227 |
| 6                | 6                | 0              | -1.509406               | 0.524463  | -0.093393 |



|    |   |   |           |           |           |
|----|---|---|-----------|-----------|-----------|
| 7  | 1 | 0 | -2.090639 | -2.809374 | -0.386654 |
| 8  | 1 | 0 | -3.253986 | -0.628412 | -0.596655 |
| 9  | 8 | 0 | 1.816852  | -0.810967 | 0.646276  |
| 10 | 8 | 0 | 3.592872  | 0.473193  | -0.778766 |
| 11 | 1 | 0 | 4.067304  | -0.221304 | -1.246852 |
| 12 | 1 | 0 | 2.889414  | -0.000681 | -0.242743 |
| 13 | 1 | 0 | 0.311218  | -2.879116 | 0.206563  |
| 14 | 6 | 0 | 0.605510  | 1.767254  | 0.519937  |
| 15 | 1 | 0 | 1.429463  | 1.589584  | 1.211534  |
| 16 | 1 | 0 | 1.041305  | 2.182309  | -0.395891 |
| 17 | 1 | 0 | -0.035574 | 2.539069  | 0.947854  |
| 18 | 6 | 0 | -2.237977 | 1.837727  | -0.228585 |
| 19 | 1 | 0 | -2.278709 | 2.377439  | 0.721871  |
| 20 | 1 | 0 | -1.746686 | 2.499457  | -0.947020 |
| 21 | 1 | 0 | -3.263055 | 1.676742  | -0.565286 |

Rotational constants (GHZ): 1.8457943 0.9429440 0.6759255

#### 2,4-dimethylphenol

Electronic Energy -462.457765

Stoichiometry C<sub>8</sub>H<sub>12</sub>O<sub>2</sub>

Framework group C1[X(C<sub>8</sub>H<sub>12</sub>O<sub>2</sub>)]

Deg. of freedom 60

Full point group C1 NOp 1

Largest Abelian subgroup C1 NOp 1

Largest concise Abelian subgroup C1 NOp 1

Standard orientation:

| Center<br>Number | Atomic<br>Number | Atomic<br>Type | Coordinates (Angstroms) |           |           |
|------------------|------------------|----------------|-------------------------|-----------|-----------|
|                  |                  |                | X                       | Y         | Z         |
| 1                | 6                | 0              | -0.163074               | 0.656721  | 0.014495  |
| 2                | 6                | 0              | -0.444875               | -0.713331 | 0.018379  |
| 3                | 6                | 0              | 0.588368                | -1.641541 | 0.000375  |
| 4                | 6                | 0              | 1.910637                | -1.221916 | -0.019421 |
| 5                | 6                | 0              | 2.229077                | 0.133165  | -0.019997 |
| 6                | 6                | 0              | 1.175277                | 1.044062  | -0.005774 |
| 7                | 1                | 0              | 2.703554                | -1.961905 | -0.036691 |
| 8                | 8                | 0              | -1.723171               | -1.216098 | 0.034893  |
| 9                | 1                | 0              | -2.429147               | -0.537552 | 0.033976  |
| 10               | 8                | 0              | -4.120464               | 0.122308  | 0.055288  |
| 11               | 1                | 0              | -4.736282               | -0.449273 | -0.419165 |
| 12               | 1                | 0              | -4.164437               | 0.971763  | -0.399951 |
| 13               | 1                | 0              | 1.398019                | 2.106831  | -0.011924 |
| 14               | 6                | 0              | 3.659012                | 0.603154  | -0.009272 |
| 15               | 1                | 0              | 3.999333                | 0.809260  | 1.010066  |
| 16               | 1                | 0              | 4.325692                | -0.151444 | -0.430269 |
| 17               | 1                | 0              | 3.778738                | 1.523833  | -0.583704 |
| 18               | 1                | 0              | 0.342386                | -2.697207 | -0.001662 |
| 19               | 6                | 0              | -1.259362               | 1.684560  | 0.026279  |
| 20               | 1                | 0              | -1.897339               | 1.602673  | -0.858177 |
| 21               | 1                | 0              | -1.904484               | 1.574773  | 0.902072  |
| 22               | 1                | 0              | -0.837312               | 2.689326  | 0.043610  |

Rotational constants (GHZ): 2.9216934 0.6810770 0.5566300

#### 2,4-dimethylphenolate

Electronic Energy -461.986867

Stoichiometry C<sub>8</sub>H<sub>11</sub>O<sub>2</sub>(1-)

Framework group C1[X(C<sub>8</sub>H<sub>11</sub>O<sub>2</sub>)]

Deg. of freedom 57

Full point group C1 NOp 1

Largest Abelian subgroup C1 NOp 1

Largest concise Abelian subgroup C1 NOp 1

Standard orientation:

| Center<br>Number | Atomic<br>Number | Atomic<br>Type | Coordinates (Angstroms) |           |           |
|------------------|------------------|----------------|-------------------------|-----------|-----------|
|                  |                  |                | X                       | Y         | Z         |
| 1                | 6                | 0              | -0.158734               | 0.806766  | -0.258786 |
| 2                | 6                | 0              | -0.640291               | -0.517902 | -0.442170 |
| 3                | 6                | 0              | 0.293817                | -1.560989 | -0.313398 |

|    |   |   |           |           |           |
|----|---|---|-----------|-----------|-----------|
| 4  | 6 | 0 | 1.630681  | -1.318562 | -0.014831 |
| 5  | 6 | 0 | 2.105290  | -0.024869 | 0.170802  |
| 6  | 6 | 0 | 1.181657  | 1.016351  | 0.039125  |
| 7  | 1 | 0 | 2.315254  | -2.157089 | 0.074355  |
| 8  | 8 | 0 | -1.909447 | -0.755484 | -0.727266 |
| 9  | 8 | 0 | -3.774568 | -0.166641 | 1.011770  |
| 10 | 1 | 0 | -4.066584 | -1.014996 | 1.360522  |
| 11 | 1 | 0 | -3.042648 | -0.382399 | 0.361075  |
| 12 | 1 | 0 | 1.524492  | 2.039717  | 0.172895  |
| 13 | 1 | 0 | -0.054322 | -2.579563 | -0.455164 |
| 14 | 6 | 0 | -1.109575 | 1.961766  | -0.400452 |
| 15 | 1 | 0 | -1.583904 | 1.970036  | -1.386506 |
| 16 | 1 | 0 | -1.918936 | 1.911106  | 0.333406  |
| 17 | 1 | 0 | -0.590388 | 2.912359  | -0.265622 |
| 18 | 6 | 0 | 3.547233  | 0.253428  | 0.508415  |
| 19 | 1 | 0 | 3.990229  | 0.978617  | -0.179795 |
| 20 | 1 | 0 | 3.654832  | 0.662940  | 1.517523  |
| 21 | 1 | 0 | 4.143646  | -0.659662 | 0.459046  |

---

|                             |           |           |           |
|-----------------------------|-----------|-----------|-----------|
| Rotational constants (GHZ): | 2.4512130 | 0.7340184 | 0.6224800 |
|-----------------------------|-----------|-----------|-----------|

## 2,6-diisopropylphenol

Electronic Energy -619.648509

Stoichiometry C12H20O2

Framework group C1[X(C12H20O2)]

Deg. of freedom 96

Full point group C1 NOp 1

Largest Abelian subgroup C1 NOp 1

Largest concise Abelian subgroup C1 NOp 1

Standard orientation:

| Center<br>Number | Atomic<br>Number | Atomic<br>Type | Coordinates (Angstroms) |           |           |
|------------------|------------------|----------------|-------------------------|-----------|-----------|
|                  |                  |                | X                       | Y         | Z         |
| 1                | 6                | 0              | -0.899862               | -0.812955 | -0.073847 |
| 2                | 6                | 0              | 0.153835                | 0.107758  | -0.143374 |
| 3                | 6                | 0              | 1.496011                | -0.297394 | -0.116360 |
| 4                | 6                | 0              | 1.765845                | -1.654990 | -0.007029 |
| 5                | 6                | 0              | 0.741891                | -2.587767 | 0.070422  |
| 6                | 6                | 0              | -0.575220               | -2.162828 | 0.034128  |
| 7                | 1                | 0              | 2.793572                | -1.994883 | 0.010378  |
| 8                | 1                | 0              | 0.971018                | -3.643378 | 0.151678  |
| 9                | 8                | 0              | -0.055495               | 1.452860  | -0.235334 |
| 10               | 1                | 0              | -0.985977               | 1.701976  | -0.331079 |
| 11               | 8                | 0              | -2.378284               | 3.011495  | -0.609971 |
| 12               | 1                | 0              | -2.004209               | 3.779438  | -1.052026 |
| 13               | 1                | 0              | -2.895961               | 3.351551  | 0.125366  |
| 14               | 1                | 0              | -1.367860               | -2.898218 | 0.085107  |
| 15               | 6                | 0              | 2.587401                | 0.755148  | -0.180622 |
| 16               | 1                | 0              | 2.237212                | 1.526698  | -0.871265 |
| 17               | 6                | 0              | 3.921025                | 0.227908  | -0.707436 |
| 18               | 1                | 0              | 3.804672                | -0.276293 | -1.669272 |
| 19               | 1                | 0              | 4.620392                | 1.056273  | -0.842776 |
| 20               | 1                | 0              | 4.385738                | -0.474576 | -0.010566 |
| 21               | 6                | 0              | 2.775659                | 1.422306  | 1.188433  |
| 22               | 1                | 0              | 3.518294                | 2.222921  | 1.129493  |
| 23               | 1                | 0              | 1.839202                | 1.851741  | 1.545538  |
| 24               | 1                | 0              | 3.122907                | 0.693082  | 1.925844  |
| 25               | 6                | 0              | -2.341075               | -0.331239 | -0.079426 |
| 26               | 1                | 0              | -2.416115               | 0.503261  | -0.784061 |
| 27               | 6                | 0              | -3.343280               | -1.381053 | -0.558545 |
| 28               | 1                | 0              | -4.333853               | -0.931140 | -0.656928 |
| 29               | 1                | 0              | -3.060339               | -1.792477 | -1.529320 |
| 30               | 1                | 0              | -3.432919               | -2.209119 | 0.148628  |
| 31               | 6                | 0              | -2.745058               | 0.192564  | 1.306984  |
| 32               | 1                | 0              | -2.059605               | 0.963058  | 1.666170  |
| 33               | 1                | 0              | -3.755221               | 0.611660  | 1.285070  |
| 34               | 1                | 0              | -2.733738               | -0.621160 | 2.036489  |

---

|                             |           |           |           |
|-----------------------------|-----------|-----------|-----------|
| Rotational constants (GHZ): | 0.8838550 | 0.4654856 | 0.3375062 |
|-----------------------------|-----------|-----------|-----------|

**2,6-diisopropylphenolate**

Electronic Energy -619.177001

Stoichiometry C<sub>12</sub>H<sub>19</sub>O<sub>2</sub>(1-)Framework group C1[X(C<sub>12</sub>H<sub>19</sub>O<sub>2</sub>)]

Deg. of freedom 93

Full point group C<sub>1</sub> NOp 1Largest Abelian subgroup C<sub>1</sub> NOp 1Largest concise Abelian subgroup C<sub>1</sub> NOp 1

Standard orientation:

| Center<br>Number | Atomic<br>Number | Atomic<br>Type | Coordinates (Angstroms) |           |           |
|------------------|------------------|----------------|-------------------------|-----------|-----------|
|                  |                  |                | X                       | Y         | Z         |
| 1                | 6                | 0              | -1.011160               | -0.747684 | -0.069974 |
| 2                | 6                | 0              | 0.089260                | 0.170344  | -0.075883 |
| 3                | 6                | 0              | 1.411178                | -0.383147 | -0.114805 |
| 4                | 6                | 0              | 1.593288                | -1.756813 | -0.133374 |
| 5                | 6                | 0              | 0.515861                | -2.638253 | -0.118781 |
| 6                | 6                | 0              | -0.773471               | -2.113513 | -0.088177 |
| 7                | 1                | 0              | 2.600018                | -2.162923 | -0.166896 |
| 8                | 1                | 0              | 0.676763                | -3.710645 | -0.138481 |
| 9                | 8                | 0              | -0.081580               | 1.445275  | -0.043327 |
| 10               | 8                | 0              | -1.761904               | 3.311081  | -0.847051 |
| 11               | 1                | 0              | -1.175995               | 3.740767  | -1.472698 |
| 12               | 1                | 0              | -1.205515               | 2.560977  | -0.496586 |
| 13               | 1                | 0              | -1.614405               | -2.800394 | -0.084603 |
| 14               | 6                | 0              | -2.406345               | -0.157672 | -0.010415 |
| 15               | 1                | 0              | -2.408337               | 0.711842  | -0.673831 |
| 16               | 6                | 0              | -3.512317               | -1.101645 | -0.480826 |
| 17               | 1                | 0              | -4.469651               | -0.572468 | -0.511230 |
| 18               | 1                | 0              | -3.307902               | -1.492340 | -1.481184 |
| 19               | 1                | 0              | -3.633482               | -1.955351 | 0.193902  |
| 20               | 6                | 0              | -2.717503               | 0.364899  | 1.398715  |
| 21               | 1                | 0              | -1.946433               | 1.068099  | 1.713913  |
| 22               | 1                | 0              | -3.683429               | 0.881095  | 1.423217  |
| 23               | 1                | 0              | -2.750874               | -0.463781 | 2.114572  |
| 24               | 6                | 0              | 2.560104                | 0.603899  | -0.114441 |
| 25               | 1                | 0              | 2.244771                | 1.428402  | -0.762462 |
| 26               | 6                | 0              | 2.762572                | 1.205509  | 1.282340  |
| 27               | 1                | 0              | 3.532344                | 1.986460  | 1.270168  |
| 28               | 1                | 0              | 1.827545                | 1.646172  | 1.628512  |
| 29               | 1                | 0              | 3.073850                | 0.431567  | 1.992224  |
| 30               | 6                | 0              | 3.876291                | 0.043785  | -0.651621 |
| 31               | 1                | 0              | 3.750622                | -0.392173 | -1.646219 |
| 32               | 1                | 0              | 4.626804                | 0.837920  | -0.719506 |
| 33               | 1                | 0              | 4.284623                | -0.732322 | 0.003668  |

|                             |           |           |           |
|-----------------------------|-----------|-----------|-----------|
| Rotational constants (GHZ): | 0.8609665 | 0.4825214 | 0.3477597 |
|-----------------------------|-----------|-----------|-----------|

**2-methyl-4-terz-butylphenol**

Electronic Energy -580.353998

Stoichiometry C<sub>11</sub>H<sub>18</sub>O<sub>2</sub>Framework group C1[X(C<sub>11</sub>H<sub>18</sub>O<sub>2</sub>)]

Deg. of freedom 87

Full point group C<sub>1</sub> NOp 1Largest Abelian subgroup C<sub>1</sub> NOp 1Largest concise Abelian subgroup C<sub>1</sub> NOp 1

Standard orientation:

| Center<br>Number | Atomic<br>Number | Atomic<br>Type | Coordinates (Angstroms) |           |           |
|------------------|------------------|----------------|-------------------------|-----------|-----------|
|                  |                  |                | X                       | Y         | Z         |
| 1                | 6                | 0              | -0.514186               | 1.126158  | -0.004520 |
| 2                | 6                | 0              | 0.853310                | 1.366304  | -0.003067 |
| 3                | 6                | 0              | 1.715398                | 0.263942  | 0.004945  |
| 4                | 6                | 0              | 1.200937                | -1.022700 | 0.011326  |
| 5                | 6                | 0              | -0.176336               | -1.228400 | 0.010054  |
| 6                | 6                | 0              | -1.066441               | -0.159894 | 0.002046  |
| 7                | 1                | 0              | -1.172055               | 1.988415  | -0.011032 |
| 8                | 1                | 0              | 1.877581                | -1.869621 | 0.018108  |
| 9                | 1                | 0              | -0.538321               | -2.247795 | 0.015469  |
| 10               | 8                | 0              | 3.063624                | 0.513586  | 0.006087  |

|    |   |   |           |           |           |
|----|---|---|-----------|-----------|-----------|
| 11 | 1 | 0 | 3.582127  | -0.321747 | 0.012762  |
| 12 | 8 | 0 | 4.662098  | -1.695962 | 0.041494  |
| 13 | 1 | 0 | 4.846224  | -2.040188 | -0.841208 |
| 14 | 1 | 0 | 5.527199  | -1.493220 | 0.418398  |
| 15 | 6 | 0 | -2.588530 | -0.336758 | 0.000089  |
| 16 | 6 | 0 | -2.997660 | -1.811920 | 0.011550  |
| 17 | 1 | 0 | -4.087817 | -1.885455 | 0.010314  |
| 18 | 1 | 0 | -2.627643 | -2.343234 | -0.868631 |
| 19 | 1 | 0 | -2.630556 | -2.328592 | 0.901622  |
| 20 | 6 | 0 | -3.181687 | 0.316438  | -1.258565 |
| 21 | 1 | 0 | -4.268659 | 0.196531  | -1.268688 |
| 22 | 1 | 0 | -2.962690 | 1.385391  | -1.299774 |
| 23 | 1 | 0 | -2.781440 | -0.146947 | -2.164244 |
| 24 | 6 | 0 | -3.187680 | 0.337367  | 1.244789  |
| 25 | 1 | 0 | -2.791399 | -0.110450 | 2.159987  |
| 26 | 1 | 0 | -2.969478 | 1.406980  | 1.269035  |
| 27 | 1 | 0 | -4.274624 | 0.217032  | 1.251917  |
| 28 | 6 | 0 | 1.408589  | 2.761634  | -0.010122 |
| 29 | 1 | 0 | 2.031473  | 2.947237  | 0.868981  |
| 30 | 1 | 0 | 2.037699  | 2.935868  | -0.887097 |
| 31 | 1 | 0 | 0.602319  | 3.495778  | -0.017700 |

Rotational constants (GHZ):      1.3312348      0.3976055      0.3291344

## 2-methyl-4-terz-butylphenolate

Electronic Energy -579.881634

Stoichiometry C11H17O2(1-)

Framework group C1[X(C11H17O2)]

Deg. of freedom 84

Full point group C1 NOp 1

Largest Abelian subgroup C1 NOp 1

Largest concise Abelian subgroup C1 NOp 1

Standard orientation:

| Center<br>Number | Atomic<br>Number | Atomic<br>Type | Coordinates (Angstroms) |           |           |
|------------------|------------------|----------------|-------------------------|-----------|-----------|
|                  |                  |                | X                       | Y         | Z         |
| 1                | 6                | 0              | -0.438592               | 1.105346  | 0.020864  |
| 2                | 6                | 0              | 0.934079                | 1.306204  | -0.006290 |
| 3                | 6                | 0              | 1.809676                | 0.188742  | -0.071352 |
| 4                | 6                | 0              | 1.211232                | -1.082563 | -0.100087 |
| 5                | 6                | 0              | -0.170691               | -1.249875 | -0.070228 |
| 6                | 6                | 0              | -1.036457               | -0.161795 | -0.010204 |
| 7                | 1                | 0              | -1.071236               | 1.986805  | 0.068365  |
| 8                | 1                | 0              | 1.855611                | -1.954489 | -0.149802 |
| 9                | 1                | 0              | -0.561689               | -2.259697 | -0.096727 |
| 10               | 8                | 0              | 3.120056                | 0.352534  | -0.105793 |
| 11               | 8                | 0              | 4.773529                | -1.647254 | 0.033601  |
| 12               | 1                | 0              | 5.009536                | -1.740592 | 0.962104  |
| 13               | 1                | 0              | 4.095720                | -0.900460 | -0.000309 |
| 14               | 6                | 0              | -2.563142               | -0.293855 | 0.018485  |
| 15               | 6                | 0              | -3.016103               | -1.756127 | -0.016945 |
| 16               | 1                | 0              | -4.107921               | -1.800054 | 0.005660  |
| 17               | 1                | 0              | -2.681943               | -2.263186 | -0.925421 |
| 18               | 1                | 0              | -2.642873               | -2.317935 | 0.842830  |
| 19               | 6                | 0              | -3.170807               | 0.423352  | -1.198201 |
| 20               | 1                | 0              | -4.261531               | 0.339426  | -1.184620 |
| 21               | 1                | 0              | -2.917456               | 1.485621  | -1.206476 |
| 22               | 1                | 0              | -2.809166               | -0.017474 | -2.131153 |
| 23               | 6                | 0              | -3.119209               | 0.346791  | 1.300680  |
| 24               | 1                | 0              | -2.720402               | -0.149900 | 2.189354  |
| 25               | 1                | 0              | -2.864741               | 1.406930  | 1.363682  |
| 26               | 1                | 0              | -4.209670               | 0.262457  | 1.326402  |
| 27               | 6                | 0              | 1.513727                | 2.692010  | 0.031523  |
| 28               | 1                | 0              | 2.170633                | 2.829101  | 0.895943  |
| 29               | 1                | 0              | 2.121857                | 2.897864  | -0.854693 |
| 30               | 1                | 0              | 0.724309                | 3.443954  | 0.082928  |

Rotational constants (GHZ):      1.3875450      0.3980773      0.3329770

**4-bromothymol**

Electronic Energy -3114.701617

Stoichiometry C<sub>10</sub>H<sub>15</sub>BrO<sub>2</sub>Framework group C1[X(C<sub>10</sub>H<sub>15</sub>BrO<sub>2</sub>)]

Deg. of freedom 78

Full point group C<sub>1</sub> NOp 1Largest Abelian subgroup C<sub>1</sub> NOp 1Largest concise Abelian subgroup C<sub>1</sub> NOp 1

Standard orientation:

| Center<br>Number | Atomic<br>Number | Atomic<br>Type | Coordinates (Angstroms) |           |           |
|------------------|------------------|----------------|-------------------------|-----------|-----------|
|                  |                  |                | X                       | Y         | Z         |
| 1                | 6                | 0              | 0.739299                | -1.528334 | -0.017415 |
| 2                | 6                | 0              | 1.561410                | -0.410320 | -0.092043 |
| 3                | 6                | 0              | 1.018506                | 0.880397  | -0.132585 |
| 4                | 6                | 0              | -0.365984               | 0.988363  | -0.091627 |
| 5                | 6                | 0              | -1.175382               | -0.135381 | -0.012895 |
| 6                | 6                | 0              | -0.649433               | -1.422341 | 0.025653  |
| 7                | 1                | 0              | 1.191634                | -2.513148 | 0.007213  |
| 8                | 1                | 0              | -0.824119               | 1.967538  | -0.125183 |
| 9                | 8                | 0              | 2.920385                | -0.533519 | -0.131778 |
| 10               | 1                | 0              | 3.202794                | -1.476461 | -0.121549 |
| 11               | 6                | 0              | 1.928575                | 2.092555  | -0.181958 |
| 12               | 1                | 0              | 2.792068                | 1.815178  | -0.791818 |
| 13               | 6                | 0              | 2.443637                | 2.433148  | 1.221950  |
| 14               | 1                | 0              | 2.943279                | 1.580252  | 1.685346  |
| 15               | 1                | 0              | 3.156389                | 3.260847  | 1.178259  |
| 16               | 1                | 0              | 1.615103                | 2.734258  | 1.869474  |
| 17               | 6                | 0              | 1.284267                | 3.318774  | -0.823977 |
| 18               | 1                | 0              | 2.027946                | 4.112052  | -0.929025 |
| 19               | 1                | 0              | 0.888109                | 3.094350  | -1.817179 |
| 20               | 1                | 0              | 0.468881                | 3.715816  | -0.213994 |
| 21               | 6                | 0              | -1.497842               | -2.657712 | 0.106664  |
| 22               | 1                | 0              | -2.174712               | -2.732053 | -0.747625 |
| 23               | 1                | 0              | -0.870923               | -3.549027 | 0.123523  |
| 24               | 1                | 0              | -2.115927               | -2.657141 | 1.007499  |
| 25               | 8                | 0              | 3.905632                | -3.066158 | -0.115447 |
| 26               | 1                | 0              | 4.577678                | -3.177013 | 0.568531  |
| 27               | 1                | 0              | 4.355063                | -3.270242 | -0.944944 |
| 28               | 35               | 0              | -3.073249               | 0.129638  | 0.034819  |

Rotational constants (GHZ): 0.6825016 0.3388602 0.2355357

**4-bromothymolate**

Electronic Energy -3114.231650

Stoichiometry C<sub>10</sub>H<sub>14</sub>BrO<sub>2</sub>(1-)Framework group C1[X(C<sub>10</sub>H<sub>14</sub>BrO<sub>2</sub>)]

Deg. of freedom 75

Full point group C<sub>1</sub> NOp 1Largest Abelian subgroup C<sub>1</sub> NOp 1Largest concise Abelian subgroup C<sub>1</sub> NOp 1

Standard orientation:

| Center<br>Number | Atomic<br>Number | Atomic<br>Type | Coordinates (Angstroms) |           |           |
|------------------|------------------|----------------|-------------------------|-----------|-----------|
|                  |                  |                | X                       | Y         | Z         |
| 1                | 6                | 0              | 0.694969                | 1.592221  | 0.134296  |
| 2                | 6                | 0              | 1.616394                | 0.528297  | 0.042134  |
| 3                | 6                | 0              | 1.089053                | -0.788970 | -0.085043 |
| 4                | 6                | 0              | -0.287359               | -0.959440 | -0.102334 |
| 5                | 6                | 0              | -1.157269               | 0.119141  | -0.000586 |
| 6                | 6                | 0              | -0.686875               | 1.422977  | 0.118356  |
| 7                | 1                | 0              | 1.092775                | 2.597647  | 0.227342  |
| 8                | 1                | 0              | -0.700488               | -1.955347 | -0.199978 |
| 9                | 8                | 0              | 2.910627                | 0.749485  | 0.072712  |
| 10               | 6                | 0              | 2.043771                | -1.964259 | -0.163592 |
| 11               | 1                | 0              | 2.915231                | -1.619728 | -0.727764 |
| 12               | 6                | 0              | 1.475376                | -3.183091 | -0.887436 |
| 13               | 1                | 0              | 1.106150                | -2.926346 | -1.883496 |
| 14               | 1                | 0              | 2.252182                | -3.943270 | -1.002267 |
| 15               | 1                | 0              | 0.653602                | -3.641011 | -0.330319 |

|    |    |   |           |           |           |
|----|----|---|-----------|-----------|-----------|
| 16 | 6  | 0 | 2.534216  | -2.362001 | 1.234476  |
| 17 | 1  | 0 | 3.287632  | -3.152542 | 1.172310  |
| 18 | 1  | 0 | 2.977958  | -1.513634 | 1.759250  |
| 19 | 1  | 0 | 1.702151  | -2.736599 | 1.838319  |
| 20 | 6  | 0 | -1.595655 | 2.614741  | 0.225719  |
| 21 | 1  | 0 | -2.244584 | 2.544710  | 1.102117  |
| 22 | 1  | 0 | -1.012378 | 3.532282  | 0.306164  |
| 23 | 1  | 0 | -2.247182 | 2.700142  | -0.647358 |
| 24 | 8  | 0 | 3.902517  | 3.127106  | -0.351712 |
| 25 | 1  | 0 | 4.473359  | 3.024292  | -1.119854 |
| 26 | 1  | 0 | 3.490360  | 2.222813  | -0.198533 |
| 27 | 35 | 0 | -3.046047 | -0.236109 | -0.033139 |

Rotational constants (GHZ):      0.7009606      0.3383014      0.2384508

#### 4-chlorothymol

Electronic Energy -1000.683458

Stoichiometry C10H15ClO2

Framework group C1[X(C10H15ClO2)]

Deg. of freedom 78

Full point group C1 NOp 1

Largest Abelian subgroup C1 NOp 1

Largest concise Abelian subgroup C1 NOp 1

Standard orientation:

| Center<br>Number | Atomic<br>Number | Atomic<br>Type | Coordinates (Angstroms) |           |           |
|------------------|------------------|----------------|-------------------------|-----------|-----------|
|                  |                  |                | X                       | Y         | Z         |
| 1                | 6                | 0              | -0.060667               | 1.515350  | -0.013219 |
| 2                | 6                | 0              | -0.983489               | 0.478916  | -0.089987 |
| 3                | 6                | 0              | -0.564840               | -0.857538 | -0.127789 |
| 4                | 6                | 0              | 0.802786                | -1.095730 | -0.079252 |
| 5                | 6                | 0              | 1.711249                | -0.052231 | 0.002491  |
| 6                | 6                | 0              | 1.310877                | 1.278078  | 0.036694  |
| 7                | 1                | 0              | -0.418747               | 2.538135  | 0.009335  |
| 8                | 1                | 0              | 1.173892                | -2.111377 | -0.107806 |
| 9                | 8                | 0              | -2.324810               | 0.731170  | -0.134854 |
| 10               | 1                | 0              | -2.514606               | 1.696797  | -0.126583 |
| 11               | 6                | 0              | -1.584168               | -1.978821 | -0.184998 |
| 12               | 1                | 0              | -2.409559               | -1.625121 | -0.808066 |
| 13               | 6                | 0              | -2.147947               | -2.263548 | 1.212521  |
| 14               | 1                | 0              | -2.570340               | -1.365257 | 1.666809  |
| 15               | 1                | 0              | -2.935600               | -3.019797 | 1.160849  |
| 16               | 1                | 0              | -1.360696               | -2.639828 | 1.872091  |
| 17               | 6                | 0              | -1.048626               | -3.262337 | -0.814755 |
| 18               | 1                | 0              | -1.860819               | -3.984691 | -0.923846 |
| 19               | 1                | 0              | -0.624003               | -3.080458 | -1.804883 |
| 20               | 1                | 0              | -0.278737               | -3.729000 | -0.195010 |
| 21               | 6                | 0              | 2.282399                | 2.418473  | 0.120922  |
| 22               | 1                | 0              | 2.969580                | 2.417540  | -0.728454 |
| 23               | 1                | 0              | 1.751632                | 3.370174  | 0.130858  |
| 24               | 1                | 0              | 2.890146                | 2.355315  | 1.026696  |
| 25               | 8                | 0              | -3.070962               | 3.347680  | -0.130502 |
| 26               | 1                | 0              | -3.727369               | 3.519655  | 0.555965  |
| 27               | 1                | 0              | -3.505444               | 3.585779  | -0.958871 |
| 28               | 17               | 0              | 3.428317                | -0.449550 | 0.057529  |

Rotational constants (GHZ):      0.6843679      0.4990451      0.3033784

#### 4-chlorothymolate

Electronic Energy -1000.213427

Stoichiometry C10H14ClO2(1-)

Framework group C1[X(C10H14ClO2)]

Deg. of freedom 75

Full point group C1 NOp 1

Largest Abelian subgroup C1 NOp 1

Largest concise Abelian subgroup C1 NOp 1

Standard orientation:

| Center<br>Number | Atomic<br>Number | Atomic<br>Type | Coordinates (Angstroms) |   |   |
|------------------|------------------|----------------|-------------------------|---|---|
|                  |                  |                | X                       | Y | Z |

|    |    |   |           |           |           |
|----|----|---|-----------|-----------|-----------|
| 1  | 6  | 0 | -0.051353 | 1.554147  | 0.107143  |
| 2  | 6  | 0 | 1.006391  | 0.624645  | 0.017641  |
| 3  | 6  | 0 | 0.662994  | -0.753729 | -0.097197 |
| 4  | 6  | 0 | -0.677498 | -1.110387 | -0.108094 |
| 5  | 6  | 0 | -1.683045 | -0.158476 | -0.011669 |
| 6  | 6  | 0 | -1.396328 | 1.197342  | 0.097396  |
| 7  | 1  | 0 | 0.205918  | 2.604955  | 0.191646  |
| 8  | 1  | 0 | -0.957553 | -2.152824 | -0.195436 |
| 9  | 8  | 0 | 2.258453  | 1.021726  | 0.038620  |
| 10 | 6  | 0 | 1.766379  | -1.791373 | -0.168067 |
| 11 | 1  | 0 | 2.583064  | -1.340964 | -0.739584 |
| 12 | 6  | 0 | 1.364386  | -3.082912 | -0.877100 |
| 13 | 1  | 0 | 0.964533  | -2.888913 | -1.875515 |
| 14 | 1  | 0 | 2.235143  | -3.734632 | -0.984220 |
| 15 | 1  | 0 | 0.610457  | -3.639262 | -0.313769 |
| 16 | 6  | 0 | 2.308183  | -2.104442 | 1.232513  |
| 17 | 1  | 0 | 3.163609  | -2.783780 | 1.176271  |
| 18 | 1  | 0 | 2.629989  | -1.198007 | 1.748945  |
| 19 | 1  | 0 | 1.536154  | -2.585000 | 1.841086  |
| 20 | 6  | 0 | -2.468350 | 2.244878  | 0.199859  |
| 21 | 1  | 0 | -3.098274 | 2.086178  | 1.078743  |
| 22 | 1  | 0 | -2.024740 | 3.237923  | 0.273592  |
| 23 | 1  | 0 | -3.126740 | 2.228613  | -0.672276 |
| 24 | 8  | 0 | 2.944134  | 3.520416  | -0.276995 |
| 25 | 1  | 0 | 3.245349  | 3.593327  | -1.188300 |
| 26 | 1  | 0 | 2.637424  | 2.568809  | -0.169670 |
| 27 | 17 | 0 | -3.365623 | -0.708925 | -0.036415 |

-----

Rotational constants (GHZ):            0.7032400            0.4966340            0.3075033

**4-methoxyphenol**

Electronic Energy -498.368030

Stoichiometry C7H10O3

Framework group C1[X(C7H10O3)]

Deg. of freedom 54

Full point group C1 NOp 1

Largest Abelian subgroup C1 NOp 1

Largest concise Abelian subgroup C1 NOp 1

Standard orientation:

| Center<br>Number | Atomic<br>Number | Atomic<br>Type | Coordinates (Angstroms) |           |           |
|------------------|------------------|----------------|-------------------------|-----------|-----------|
|                  |                  |                | X                       | Y         | Z         |
| 1                | 6                | 0              | 1.269949                | 1.028952  | 0.005199  |
| 2                | 6                | 0              | -0.046978               | 1.479645  | 0.003503  |
| 3                | 6                | 0              | -1.101315               | 0.579923  | -0.005149 |
| 4                | 6                | 0              | -0.834550               | -0.787372 | -0.012495 |
| 5                | 6                | 0              | 0.474365                | -1.238825 | -0.010922 |
| 6                | 6                | 0              | 1.532925                | -0.335058 | -0.002045 |
| 7                | 1                | 0              | 2.073349                | 1.752296  | 0.012256  |
| 8                | 1                | 0              | -0.255415               | 2.542937  | 0.009249  |
| 9                | 1                | 0              | -1.653394               | -1.496847 | -0.019683 |
| 10               | 1                | 0              | 0.687131                | -2.301238 | -0.016671 |
| 11               | 8                | 0              | -2.380916               | 1.077774  | -0.006599 |
| 12               | 1                | 0              | -3.047268               | 0.354749  | -0.006328 |
| 13               | 8                | 0              | -4.377067               | -0.779474 | -0.003966 |
| 14               | 1                | 0              | -4.850775               | -0.784365 | 0.836912  |
| 15               | 1                | 0              | -5.044862               | -0.568165 | -0.668017 |
| 16               | 8                | 0              | 2.796310                | -0.878305 | -0.000988 |
| 17               | 6                | 0              | 3.903412                | 0.015864  | 0.007738  |
| 18               | 1                | 0              | 4.793917                | -0.609240 | 0.006157  |
| 19               | 1                | 0              | 3.904353                | 0.651327  | -0.881538 |
| 20               | 1                | 0              | 3.899497                | 0.639826  | 0.905118  |

-----

Rotational constants (GHZ):            3.8013424            0.5606876            0.4912496

**4-methoxyphenolate**

Electronic Energy -497.894732

Stoichiometry C7H9O3(1-)

Framework group C1[X(C7H9O3)]

Deg. of freedom 51

Full point group C1 NOp 1

Largest Abelian subgroup C1 NOp 1  
 Largest concise Abelian subgroup C1 NOp 1  
 Standard orientation:

| Center<br>Number            | Atomic<br>Number | Atomic<br>Type | Coordinates (Angstroms) |           |           |
|-----------------------------|------------------|----------------|-------------------------|-----------|-----------|
|                             |                  |                | X                       | Y         | Z         |
| 1                           | 6                | 0              | -1.117685               | 1.287800  | -0.051521 |
| 2                           | 6                | 0              | 0.235357                | 1.573296  | 0.059363  |
| 3                           | 6                | 0              | 1.219881                | 0.569135  | -0.076229 |
| 4                           | 6                | 0              | 0.753344                | -0.739446 | -0.335191 |
| 5                           | 6                | 0              | -0.601260               | -1.020739 | -0.444437 |
| 6                           | 6                | 0              | -1.540796               | -0.009657 | -0.303374 |
| 7                           | 1                | 0              | -1.854649               | 2.077035  | 0.053553  |
| 8                           | 1                | 0              | 0.559378                | 2.590659  | 0.252002  |
| 9                           | 1                | 0              | 1.479716                | -1.536042 | -0.453687 |
| 10                          | 1                | 0              | -0.935233               | -2.033025 | -0.646423 |
| 11                          | 8                | 0              | 2.503158                | 0.846814  | 0.031223  |
| 12                          | 8                | 0              | 4.316497                | -1.013536 | 0.233964  |
| 13                          | 1                | 0              | 4.589373                | -1.015422 | 1.156997  |
| 14                          | 1                | 0              | 3.585608                | -0.324553 | 0.168686  |
| 15                          | 8                | 0              | -2.900896               | -0.288516 | -0.450412 |
| 16                          | 6                | 0              | -3.548231               | -0.644616 | 0.771412  |
| 17                          | 1                | 0              | -3.483990               | 0.172034  | 1.496234  |
| 18                          | 1                | 0              | -4.594136               | -0.837638 | 0.534916  |
| 19                          | 1                | 0              | -3.099803               | -1.545784 | 1.199400  |
| Rotational constants (GHZ): |                  |                | 3.3501266               | 0.5853183 | 0.5210443 |

#### 4-hydroxybenzonitrile

Electronic Energy -476.089821  
 Stoichiometry C7H7NO2  
 Framework group C1[X(C7H7NO2)]  
 Deg. of freedom 45  
 Full point group C1 NOp 1  
 Largest Abelian subgroup C1 NOp 1  
 Largest concise Abelian subgroup C1 NOp 1  
 Standard orientation:

| Center<br>Number            | Atomic<br>Number | Atomic<br>Type | Coordinates (Angstroms) |           |           |
|-----------------------------|------------------|----------------|-------------------------|-----------|-----------|
|                             |                  |                | X                       | Y         | Z         |
| 1                           | 6                | 0              | 1.340141                | 1.247216  | 0.004309  |
| 2                           | 6                | 0              | 0.003427                | 1.586637  | 0.003780  |
| 3                           | 6                | 0              | -0.970701               | 0.586713  | -0.001238 |
| 4                           | 6                | 0              | -0.595469               | -0.758119 | -0.006037 |
| 5                           | 6                | 0              | 0.743252                | -1.097491 | -0.005656 |
| 6                           | 6                | 0              | 1.719862                | -0.098732 | -0.000419 |
| 7                           | 1                | 0              | 2.097731                | 2.020832  | 0.008339  |
| 8                           | 1                | 0              | -0.304621               | 2.624570  | 0.007358  |
| 9                           | 1                | 0              | -1.355773               | -1.528874 | -0.010397 |
| 10                          | 1                | 0              | 1.037791                | -2.139311 | -0.009457 |
| 11                          | 8                | 0              | -2.265798               | 0.973669  | -0.001253 |
| 12                          | 1                | 0              | -2.886794               | 0.203988  | -0.003877 |
| 13                          | 8                | 0              | -4.087012               | -1.003595 | -0.012494 |
| 14                          | 1                | 0              | -4.564533               | -1.044034 | 0.825504  |
| 15                          | 1                | 0              | -4.763940               | -0.843323 | -0.681863 |
| 16                          | 6                | 0              | 3.099917                | -0.450731 | 0.000179  |
| 17                          | 7                | 0              | 4.217149                | -0.735342 | 0.000694  |
| Rotational constants (GHZ): |                  |                | 3.6993506               | 0.5923894 | 0.5118202 |

#### 4-cyanophenolate

Electronic Energy -475.626501  
 Stoichiometry C7H6NO2(1-)  
 Framework group C1[X(C7H6NO2)]  
 Deg. of freedom 42  
 Full point group C1 NOp 1  
 Largest Abelian subgroup C1 NOp 1  
 Largest concise Abelian subgroup C1 NOp 1



Standard orientation:

| Center<br>Number | Atomic<br>Number | Atomic<br>Type | Coordinates (Angstroms) |           |           |
|------------------|------------------|----------------|-------------------------|-----------|-----------|
|                  |                  |                | X                       | Y         | Z         |
| 1                | 6                | 0              | -1.269619               | 1.255319  | 0.013737  |
| 2                | 6                | 0              | 0.064371                | 1.587131  | 0.004769  |
| 3                | 6                | 0              | 1.081057                | 0.592386  | -0.017557 |
| 4                | 6                | 0              | 0.647649                | -0.763044 | -0.030438 |
| 5                | 6                | 0              | -0.687541               | -1.092066 | -0.021336 |
| 6                | 6                | 0              | -1.670209               | -0.090237 | 0.001002  |
| 7                | 1                | 0              | -2.022641               | 2.034910  | 0.030927  |
| 8                | 1                | 0              | 0.367103                | 2.628094  | 0.014758  |
| 9                | 1                | 0              | 1.398314                | -1.545213 | -0.048160 |
| 10               | 1                | 0              | -0.989191               | -2.133113 | -0.031585 |
| 11               | 8                | 0              | 2.335217                | 0.911546  | -0.025713 |
| 12               | 8                | 0              | 4.218436                | -0.946353 | 0.045887  |
| 13               | 1                | 0              | 3.787475                | -1.804683 | -0.022997 |
| 14               | 1                | 0              | 3.475376                | -0.281357 | 0.014811  |
| 15               | 6                | 0              | -3.045085               | -0.431583 | 0.009934  |
| 16               | 7                | 0              | -4.167058               | -0.709659 | 0.017170  |

Rotational constants (GHZ):      3.7989011      0.6032874      0.5206940

#### 4-nitrophenol

Electronic Energy -588.365413

Stoichiometry C<sub>6</sub>H<sub>7</sub>NO<sub>4</sub>

Framework group C1[X(C<sub>6</sub>H<sub>7</sub>NO<sub>4</sub>)]

Deg. of freedom 48

Full point group C1 NOp 1

Largest Abelian subgroup C1 NOp 1

Largest concise Abelian subgroup C1 NOp 1

Standard orientation:

| Center<br>Number | Atomic<br>Number | Atomic<br>Type | Coordinates (Angstroms) |           |           |
|------------------|------------------|----------------|-------------------------|-----------|-----------|
|                  |                  |                | X                       | Y         | Z         |
| 1                | 6                | 0              | -0.918801               | 1.327207  | -0.003145 |
| 2                | 6                | 0              | 0.422312                | 1.636792  | -0.002067 |
| 3                | 6                | 0              | 1.377827                | 0.615079  | 0.002320  |
| 4                | 6                | 0              | 0.974513                | -0.724816 | 0.005998  |
| 5                | 6                | 0              | -0.367760               | -1.037630 | 0.005182  |
| 6                | 6                | 0              | -1.304936               | -0.010198 | 0.000541  |
| 7                | 1                | 0              | -1.663806               | 2.110184  | -0.006752 |
| 8                | 1                | 0              | 0.752258                | 2.667577  | -0.004802 |
| 9                | 1                | 0              | 1.719022                | -1.510362 | 0.009757  |
| 10               | 1                | 0              | -0.689586               | -2.069285 | 0.008092  |
| 11               | 8                | 0              | 2.672572                | 0.975041  | 0.002955  |
| 12               | 1                | 0              | 3.285258                | 0.195645  | 0.004551  |
| 13               | 8                | 0              | 4.451027                | -1.019557 | 0.009835  |
| 14               | 1                | 0              | 4.929262                | -1.066045 | -0.827529 |
| 15               | 1                | 0              | 5.129451                | -0.876785 | 0.681761  |
| 16               | 7                | 0              | -2.710837               | -0.338472 | -0.000564 |
| 17               | 8                | 0              | -3.529962               | 0.572781  | -0.006022 |
| 18               | 8                | 0              | -3.041754               | -1.518292 | 0.003968  |

Rotational constants (GHZ):      2.9071771      0.4960908      0.4246034

#### 4-nitrophenolate

Electronic Energy -587.906736

Stoichiometry C<sub>6</sub>H<sub>6</sub>NO<sub>4</sub>(1-)

Framework group C1[X(C<sub>6</sub>H<sub>6</sub>NO<sub>4</sub>)]

Deg. of freedom 45

Full point group C1 NOp 1

Largest Abelian subgroup C1 NOp 1

Largest concise Abelian subgroup C1 NOp 1

Standard orientation:

| Center<br>Number | Atomic<br>Number | Atomic<br>Type | Coordinates (Angstroms) |          |           |
|------------------|------------------|----------------|-------------------------|----------|-----------|
|                  |                  |                | X                       | Y        | Z         |
| 1                | 6                | 0              | -0.861535               | 1.336602 | -0.001779 |

|    |   |   |           |           |           |
|----|---|---|-----------|-----------|-----------|
| 2  | 6 | 0 | 0.468817  | 1.646668  | 0.000589  |
| 3  | 6 | 0 | 1.476526  | 0.629902  | 0.005293  |
| 4  | 6 | 0 | 1.022196  | -0.728285 | 0.008001  |
| 5  | 6 | 0 | -0.308861 | -1.036527 | 0.005570  |
| 6  | 6 | 0 | -1.267093 | -0.008877 | 0.000511  |
| 7  | 1 | 0 | -1.607143 | 2.120019  | -0.005530 |
| 8  | 1 | 0 | 0.790757  | 2.681230  | -0.001224 |
| 9  | 1 | 0 | 1.764765  | -1.517608 | 0.012205  |
| 10 | 1 | 0 | -0.632118 | -2.068526 | 0.007561  |
| 11 | 8 | 0 | 2.719506  | 0.926737  | 0.006950  |
| 12 | 8 | 0 | 4.612981  | -0.968633 | -0.016390 |
| 13 | 1 | 0 | 4.169604  | -1.822286 | 0.030186  |
| 14 | 1 | 0 | 3.880796  | -0.300401 | -0.005609 |
| 15 | 7 | 0 | -2.637758 | -0.328853 | -0.002250 |
| 16 | 8 | 0 | -3.479391 | 0.580720  | -0.006390 |
| 17 | 8 | 0 | -2.988428 | -1.517243 | -0.000538 |

Rotational constants (GHZ):      2.9354748      0.5041569      0.4302673

#### 4-nitrothymol

Electronic Energy -745.562979

Stoichiometry C10H15NO4

Framework group C1[X(C10H15NO4)]

Deg. of freedom 84

Full point group C1 NOp 1

Largest Abelian subgroup C1 NOp 1

Largest concise Abelian subgroup C1 NOp 1

Standard orientation:

| Center<br>Number | Atomic<br>Number | Atomic<br>Type | Coordinates (Angstroms) |           |           |
|------------------|------------------|----------------|-------------------------|-----------|-----------|
|                  |                  |                | X                       | Y         | Z         |
| 1                | 6                | 0              | -0.663385               | -1.020101 | -0.082352 |
| 2                | 6                | 0              | 0.704922                | -0.872297 | -0.122307 |
| 3                | 6                | 0              | 1.202042                | 0.445315  | -0.105766 |
| 4                | 6                | 0              | 0.340155                | 1.538441  | -0.048109 |
| 5                | 6                | 0              | -1.039083               | 1.398231  | 0.013459  |
| 6                | 6                | 0              | -1.519394               | 0.080601  | -0.006288 |
| 7                | 1                | 0              | -1.101527               | -2.007092 | -0.095917 |
| 8                | 1                | 0              | 0.764927                | 2.534811  | -0.057686 |
| 9                | 8                | 0              | 2.537382                | 0.610775  | -0.157041 |
| 10               | 1                | 0              | 2.804717                | 1.563539  | -0.152702 |
| 11               | 8                | 0              | 3.453929                | 3.133998  | -0.151224 |
| 12               | 1                | 0              | 4.122952                | 3.258616  | 0.533569  |
| 13               | 1                | 0              | 3.899642                | 3.344713  | -0.981253 |
| 14               | 7                | 0              | -2.932941               | -0.208540 | 0.037824  |
| 15               | 8                | 0              | -3.323681               | -1.309923 | -0.341428 |
| 16               | 8                | 0              | -3.706647               | 0.643271  | 0.458082  |
| 17               | 6                | 0              | 1.659608                | -2.048469 | -0.151405 |
| 18               | 1                | 0              | 2.497117                | -1.759529 | -0.791482 |
| 19               | 6                | 0              | 2.217924                | -2.318855 | 1.251224  |
| 20               | 1                | 0              | 2.962680                | -3.117961 | 1.216993  |
| 21               | 1                | 0              | 2.692187                | -1.431784 | 1.675058  |
| 22               | 1                | 0              | 1.416318                | -2.631763 | 1.926193  |
| 23               | 6                | 0              | 1.044666                | -3.317489 | -0.735143 |
| 24               | 1                | 0              | 0.255913                | -3.718657 | -0.093593 |
| 25               | 1                | 0              | 0.621282                | -3.142662 | -1.726989 |
| 26               | 1                | 0              | 1.813128                | -4.088125 | -0.827238 |
| 27               | 6                | 0              | -1.882857               | 2.639337  | 0.057870  |
| 28               | 1                | 0              | -2.681760               | 2.612450  | -0.684089 |
| 29               | 1                | 0              | -2.356295               | 2.760073  | 1.033258  |
| 30               | 1                | 0              | -1.256145               | 3.509902  | -0.133100 |

Rotational constants (GHZ):      0.6516378      0.4354997      0.2744360

#### 4-nitrothymolate

Electronic Energy -745.562979

Stoichiometry C10H14NO4(1-)

Framework group C1[X(C10H14NO4)]

Deg. of freedom 81

Full point group C1 NOp 1

Largest Abelian subgroup C1 NOp 1

Largest concise Abelian subgroup C1 NOp 1  
Standard orientation:

| Center<br>Number | Atomic<br>Number | Atomic<br>Type | Coordinates (Angstroms) |           |           |
|------------------|------------------|----------------|-------------------------|-----------|-----------|
|                  |                  |                | X                       | Y         | Z         |
| 1                | 6                | 0              | -0.597335               | 1.019303  | -0.072081 |
| 2                | 6                | 0              | 0.749222                | 0.818633  | -0.159285 |
| 3                | 6                | 0              | 1.238223                | -0.538049 | -0.186962 |
| 4                | 6                | 0              | 0.276859                | -1.587330 | -0.117832 |
| 5                | 6                | 0              | -1.080836               | -1.391532 | -0.025751 |
| 6                | 6                | 0              | -1.527189               | -0.042529 | -0.002236 |
| 7                | 1                | 0              | -0.989825               | 2.025142  | -0.055958 |
| 8                | 1                | 0              | 0.658400                | -2.601648 | -0.142840 |
| 9                | 8                | 0              | 2.487625                | -0.793781 | -0.278118 |
| 10               | 8                | 0              | 3.522983                | -3.246816 | -0.044039 |
| 11               | 1                | 0              | 4.120551                | -3.194195 | 0.709028  |
| 12               | 1                | 0              | 3.106980                | -2.348942 | -0.113478 |
| 13               | 7                | 0              | -2.886162               | 0.306210  | 0.084417  |
| 14               | 8                | 0              | -3.214153               | 1.507257  | 0.101871  |
| 15               | 8                | 0              | -3.758482               | -0.572851 | 0.144350  |
| 16               | 6                | 0              | 1.748415                | 1.954922  | -0.201084 |
| 17               | 1                | 0              | 2.548498                | 1.641249  | -0.877713 |
| 18               | 6                | 0              | 2.376627                | 2.171689  | 1.181629  |
| 19               | 1                | 0              | 2.815836                | 1.252011  | 1.572519  |
| 20               | 1                | 0              | 3.164169                | 2.928522  | 1.132579  |
| 21               | 1                | 0              | 1.620655                | 2.516653  | 1.893109  |
| 22               | 6                | 0              | 1.173562                | 3.265296  | -0.732308 |
| 23               | 1                | 0              | 0.712233                | 3.135853  | -1.714363 |
| 24               | 1                | 0              | 0.421598                | 3.682495  | -0.057144 |
| 25               | 1                | 0              | 1.970292                | 4.006653  | -0.829211 |
| 26               | 6                | 0              | -1.968086               | -2.602277 | 0.038414  |
| 27               | 1                | 0              | -2.557358               | -2.619778 | 0.956192  |
| 28               | 1                | 0              | -2.676186               | -2.625249 | -0.790935 |
| 29               | 1                | 0              | -1.353260               | -3.501470 | -0.000243 |

Rotational constants (GHZ): 0.6638475 0.4347930 0.2742302

## - 1H<sub>2</sub>O/CAM-B3LYP 6-311G+dp/PCM

### H<sub>2</sub>O

Electronic Energy -152.884990

Stoichiometry H4O2

Framework group C1[X(H4O2)]

Deg. of freedom 12

Full point group C1 NOp 1

Largest Abelian subgroup C1 NOp 1

Largest concise Abelian subgroup C1 NOp 1

Standard orientation:

| Center<br>Number | Atomic<br>Number | Atomic<br>Type | Coordinates (Angstroms) |           |           |
|------------------|------------------|----------------|-------------------------|-----------|-----------|
|                  |                  |                | X                       | Y         | Z         |
| 1                | 8                | 0              | 1.334098                | -0.000066 | 0.089003  |
| 2                | 1                | 0              | 1.802929                | 0.766671  | -0.260945 |
| 3                | 1                | 0              | 1.805153                | -0.765474 | -0.260862 |
| 4                | 8                | 0              | -1.492632               | -0.000059 | -0.117740 |
| 5                | 1                | 0              | -1.818990               | 0.000437  | 0.788019  |
| 6                | 1                | 0              | -0.520820               | -0.000636 | -0.036318 |

Rotational constants (GHZ): 227.6237525 6.7080289 6.6950899

### OH

Electronic Energy -152.393650

Stoichiometry H3O2(1-)

Framework group C1[X(H3O2)]

Deg. of freedom 9

Full point group C1 NOp 1

Largest Abelian subgroup C1 NOp 1

Largest concise Abelian subgroup C1 NOp 1

Standard orientation:

| Center<br>Number            | Atomic<br>Number | Atomic<br>Type | Coordinates (Angstroms) |           |           |
|-----------------------------|------------------|----------------|-------------------------|-----------|-----------|
|                             |                  |                | X                       | Y         | Z         |
| 1                           | 8                | 0              | 1.260773                | 0.034490  | -0.105350 |
| 2                           | 1                | 0              | 1.669783                | -0.137266 | 0.749182  |
| 3                           | 8                | 0              | -1.248911               | -0.110104 | -0.006106 |
| 4                           | 1                | 0              | -1.570442               | 0.780839  | 0.161116  |
| 5                           | 1                | 0              | -0.194238               | -0.038664 | -0.018653 |
| Rotational constants (GHZ): |                  |                | 330.2884982             | 8.9463552 | 8.9345926 |

### Phenol

Electronic Energy -383.851460

Stoichiometry C<sub>6</sub>H<sub>8</sub>O<sub>2</sub>

Framework group C1[X(C<sub>6</sub>H<sub>8</sub>O<sub>2</sub>)]

Deg. of freedom 42

Full point group C1 NOp 1

Largest Abelian subgroup C1 NOp 1

Largest concise Abelian subgroup C1 NOp 1

Standard orientation:

| Center<br>Number            | Atomic<br>Number | Atomic<br>Type | Coordinates (Angstroms) |           |           |
|-----------------------------|------------------|----------------|-------------------------|-----------|-----------|
|                             |                  |                | X                       | Y         | Z         |
| 1                           | 6                | 0              | 2.299681                | -0.636070 | 0.000103  |
| 2                           | 6                | 0              | 1.074936                | -1.283268 | 0.000036  |
| 3                           | 6                | 0              | -0.101809               | -0.539616 | -0.000071 |
| 4                           | 6                | 0              | -0.041477               | 0.851868  | -0.000125 |
| 5                           | 6                | 0              | 1.192748                | 1.488022  | -0.000058 |
| 6                           | 6                | 0              | 2.369476                | 0.752629  | 0.000063  |
| 7                           | 1                | 0              | 3.210615                | -1.223439 | 0.000176  |
| 8                           | 1                | 0              | 1.007148                | -2.364014 | 0.000051  |
| 9                           | 1                | 0              | -0.960991               | 1.426349  | -0.000233 |
| 10                          | 1                | 0              | 1.230377                | 2.571314  | -0.000094 |
| 11                          | 1                | 0              | 3.329412                | 1.253567  | 0.000127  |
| 12                          | 8                | 0              | -1.276510               | -1.217316 | -0.000126 |
| 13                          | 1                | 0              | -2.029068               | -0.603808 | -0.000262 |
| 14                          | 8                | 0              | -3.518559               | 0.486473  | 0.000071  |
| 15                          | 1                | 0              | -4.094700               | 0.492744  | -0.769827 |
| 16                          | 1                | 0              | -4.093570               | 0.492634  | 0.770816  |
| Rotational constants (GHZ): |                  |                | 4.3158479               | 1.1226857 | 0.8947008 |

### Phenolate

Electronic Energy -383.378420

Stoichiometry C<sub>6</sub>H<sub>7</sub>O<sub>2</sub>(1-)

Framework group C1[X(C<sub>6</sub>H<sub>7</sub>O<sub>2</sub>)]

Deg. of freedom 39

Full point group C1 NOp 1

Largest Abelian subgroup C1 NOp 1

Largest concise Abelian subgroup C1 NOp 1

Standard orientation:

| Center<br>Number | Atomic<br>Number | Atomic<br>Type | Coordinates (Angstroms) |           |           |
|------------------|------------------|----------------|-------------------------|-----------|-----------|
|                  |                  |                | X                       | Y         | Z         |
| 1                | 6                | 0              | 2.184539                | -0.790552 | 0.081527  |
| 2                | 6                | 0              | 0.900642                | -1.300021 | 0.015292  |
| 3                | 6                | 0              | -0.247804               | -0.455780 | -0.073532 |
| 4                | 6                | 0              | 0.031593                | 0.945308  | -0.090793 |
| 5                | 6                | 0              | 1.323211                | 1.435059  | -0.023047 |
| 6                | 6                | 0              | 2.425391                | 0.583721  | 0.064321  |
| 7                | 1                | 0              | 3.023522                | -1.479787 | 0.147850  |
| 8                | 1                | 0              | 0.726346                | -2.371282 | 0.028705  |
| 9                | 1                | 0              | -0.813943               | 1.622193  | -0.159323 |
| 10               | 1                | 0              | 1.479480                | 2.511349  | -0.039811 |
| 11               | 1                | 0              | 3.434599                | 0.976693  | 0.116114  |
| 12               | 8                | 0              | -1.435271               | -0.930860 | -0.133712 |
| 13               | 8                | 0              | -3.671391               | 0.439656  | 0.037503  |

|    |   |   |           |           |           |
|----|---|---|-----------|-----------|-----------|
| 14 | 1 | 0 | -3.901676 | 0.205579  | 0.938403  |
| 15 | 1 | 0 | -2.800466 | -0.041517 | -0.104873 |

---

Rotational constants (GHZ):      4.7601566      1.1053605      0.9020238

### Thymol

Electronic Energy -541.052650

Stoichiometry C10H16O2

Framework group C1[X(C10H16O2)]

Deg. of freedom 78

Full point group C1 NOp 1

Largest Abelian subgroup C1 NOp 1

Largest concise Abelian subgroup C1 NOp 1

Standard orientation:

| Center<br>Number | Atomic<br>Number | Atomic<br>Type | Coordinates (Angstroms) |           |           |
|------------------|------------------|----------------|-------------------------|-----------|-----------|
|                  |                  |                | X                       | Y         | Z         |
| 1                | 6                | 0              | -2.239615               | 0.479480  | -0.195256 |
| 2                | 1                | 0              | -2.080173               | 1.324302  | -0.871332 |
| 3                | 6                | 0              | -0.921687               | -0.266236 | -0.116622 |
| 4                | 6                | 0              | -0.825218               | -1.648090 | -0.042539 |
| 5                | 6                | 0              | 0.279145                | 0.457872  | -0.092441 |
| 6                | 6                | 0              | 0.400293                | -2.300825 | 0.053698  |
| 7                | 1                | 0              | -1.729517               | -2.243760 | -0.065199 |
| 8                | 6                | 0              | 1.505483                | -0.186664 | -0.001132 |
| 9                | 6                | 0              | 1.582768                | -1.575631 | 0.074786  |
| 10               | 1                | 0              | 0.429466                | -3.383136 | 0.108501  |
| 11               | 1                | 0              | 2.411839                | 0.411237  | 0.010128  |
| 12               | 6                | 0              | -2.614727               | 1.060210  | 1.174736  |
| 13               | 1                | 0              | -3.531754               | 1.652079  | 1.106205  |
| 14               | 1                | 0              | -2.783097               | 0.257484  | 1.898271  |
| 15               | 1                | 0              | -1.821521               | 1.704369  | 1.555458  |
| 16               | 6                | 0              | -3.387350               | -0.358097 | -0.755822 |
| 17               | 1                | 0              | -4.272530               | 0.267304  | -0.893167 |
| 18               | 1                | 0              | -3.131653               | -0.798518 | -1.722076 |
| 19               | 1                | 0              | -3.667829               | -1.168511 | -0.077645 |
| 20               | 6                | 0              | 2.922137                | -2.256445 | 0.174045  |
| 21               | 1                | 0              | 3.548984                | -2.025189 | -0.691089 |
| 22               | 1                | 0              | 3.465385                | -1.933141 | 1.065778  |
| 23               | 1                | 0              | 2.810059                | -3.340198 | 0.225512  |
| 24               | 8                | 0              | 0.194137                | 1.814595  | -0.164099 |
| 25               | 1                | 0              | 1.078119                | 2.215518  | -0.166679 |
| 26               | 8                | 0              | 2.701792                | 3.107260  | -0.174458 |
| 27               | 1                | 0              | 2.917968                | 3.689909  | 0.559363  |
| 28               | 1                | 0              | 2.981440                | 3.561970  | -0.974302 |

Rotational constants (GHZ):      0.9481365      0.6746986      0.4206987

### Thymolate

Electronic Energy -540.577064

Stoichiometry C10H15O2(1-)

Framework group C1[X(C10H15O2)]

Deg. of freedom 75

Full point group C1 NOp 1

Largest Abelian subgroup C1 NOp 1

Largest concise Abelian subgroup C1 NOp 1

Standard orientation:

| Center<br>Number | Atomic<br>Number | Atomic<br>Type | Coordinates (Angstroms) |           |           |
|------------------|------------------|----------------|-------------------------|-----------|-----------|
|                  |                  |                | X                       | Y         | Z         |
| 1                | 6                | 0              | -2.206984               | 0.097370  | -0.195215 |
| 2                | 1                | 0              | -2.173081               | 0.963386  | -0.865036 |
| 3                | 6                | 0              | -0.785068               | -0.415285 | -0.111878 |
| 4                | 6                | 0              | -0.455721               | -1.758425 | -0.095460 |
| 5                | 6                | 0              | 0.256897                | 0.571889  | -0.024685 |
| 6                | 6                | 0              | 0.863698                | -2.206758 | 0.003269  |
| 7                | 1                | 0              | -1.246182               | -2.500773 | -0.161889 |
| 8                | 6                | 0              | 1.587442                | 0.081717  | 0.069967  |
| 9                | 6                | 0              | 1.892995                | -1.270671 | 0.083478  |
| 10               | 1                | 0              | 1.082821                | -3.269879 | 0.015906  |

|    |   |   |           |           |           |
|----|---|---|-----------|-----------|-----------|
| 11 | 1 | 0 | 2.379575  | 0.822357  | 0.136170  |
| 12 | 6 | 0 | -2.677569 | 0.624211  | 1.166839  |
| 13 | 1 | 0 | -3.671760 | 1.081195  | 1.093227  |
| 14 | 1 | 0 | -2.730238 | -0.191386 | 1.896182  |
| 15 | 1 | 0 | -1.976002 | 1.376285  | 1.528165  |
| 16 | 6 | 0 | -3.210733 | -0.908386 | -0.756384 |
| 17 | 1 | 0 | -4.191307 | -0.437602 | -0.880316 |
| 18 | 1 | 0 | -2.892219 | -1.293414 | -1.728774 |
| 19 | 1 | 0 | -3.344440 | -1.763855 | -0.086336 |
| 20 | 6 | 0 | 3.332709  | -1.721040 | 0.149889  |
| 21 | 1 | 0 | 3.800270  | -1.702379 | -0.840498 |
| 22 | 1 | 0 | 3.922682  | -1.068950 | 0.798847  |
| 23 | 1 | 0 | 3.411494  | -2.742604 | 0.531531  |
| 24 | 8 | 0 | -0.020309 | 1.826054  | -0.030753 |
| 25 | 8 | 0 | 1.699965  | 3.807958  | -0.216702 |
| 26 | 1 | 0 | 1.522611  | 4.058257  | -1.125182 |
| 27 | 1 | 0 | 1.082525  | 3.029546  | -0.071278 |

Rotational constants (GHZ):      0.9019192      0.7205045      0.427509

## - 1H<sub>2</sub>O/CAM-B3LYP 6-311G+dp/CPCM

### H<sub>2</sub>O

Electronic Energy -152.885058

Stoichiometry H<sub>4</sub>O<sub>2</sub>

Framework group C1[X(H<sub>4</sub>O<sub>2</sub>)]

Deg. of freedom 12

Full point group C1 NOp 1

Largest Abelian subgroup C1 NOp 1

Largest concise Abelian subgroup C1 NOp 1

Standard orientation:

| Center<br>Number | Atomic<br>Number | Atomic<br>Type | Coordinates (Angstroms) |           |           |
|------------------|------------------|----------------|-------------------------|-----------|-----------|
|                  |                  |                | X                       | Y         | Z         |
| 1                | 8                | 0              | 1.354996                | -0.000069 | 0.095350  |
| 2                | 1                | 0              | 1.785425                | 0.769030  | -0.288545 |
| 3                | 1                | 0              | 1.787533                | -0.767656 | -0.289197 |
| 4                | 8                | 0              | -1.498925               | 0.000064  | -0.119702 |
| 5                | 1                | 0              | -1.882099               | 0.000036  | 0.759773  |
| 6                | 1                | 0              | -0.539428               | -0.001371 | 0.012785  |

Rotational constants (GHZ):      226.2594154      6.5900974      6.5775524

### OH<sup>-</sup>

Electronic Energy -152.393735

Stoichiometry H<sub>3</sub>O<sub>2</sub>(1-)

Framework group C1[X(H<sub>3</sub>O<sub>2</sub>)]

Deg. of freedom 9

Full point group C1 NOp 1

Largest Abelian subgroup C1 NOp 1

Largest concise Abelian subgroup C1 NOp 1

Standard orientation:

| Center<br>Number | Atomic<br>Number | Atomic<br>Type | Coordinates (Angstroms) |           |           |
|------------------|------------------|----------------|-------------------------|-----------|-----------|
|                  |                  |                | X                       | Y         | Z         |
| 1                | 8                | 0              | 1.248236                | 0.067572  | -0.087812 |
| 2                | 1                | 0              | 1.685496                | -0.368794 | 0.647813  |
| 3                | 8                | 0              | -1.239951               | -0.105367 | -0.035213 |
| 4                | 1                | 0              | -1.567710               | 0.704533  | 0.363085  |
| 5                | 1                | 0              | -0.184066               | -0.033376 | -0.026700 |

Rotational constants (GHZ):      336.8904690      9.0873788      9.0602910

### Phenol

Electronic Energy -383.851531

Stoichiometry C<sub>6</sub>H<sub>8</sub>O<sub>2</sub>

Framework group C1[X(C<sub>6</sub>H<sub>8</sub>O<sub>2</sub>)]

Deg. of freedom 42

Full point group C1 NOp 1  
 Largest Abelian subgroup C1 NOp 1  
 Largest concise Abelian subgroup C1 NOp 1  
 Standard orientation:

| Center<br>Number | Atomic<br>Number | Atomic<br>Type | Coordinates (Angstroms) |           |           |
|------------------|------------------|----------------|-------------------------|-----------|-----------|
|                  |                  |                | X                       | Y         | Z         |
| 1                | 6                | 0              | 2.299681                | -0.636070 | 0.000103  |
| 2                | 6                | 0              | 1.074936                | -1.283268 | 0.000036  |
| 3                | 6                | 0              | -0.101809               | -0.539616 | -0.000071 |
| 4                | 6                | 0              | -0.041477               | 0.851868  | -0.000125 |
| 5                | 6                | 0              | 1.192748                | 1.488022  | -0.000058 |
| 6                | 6                | 0              | 2.369476                | 0.752629  | 0.000063  |
| 7                | 1                | 0              | 3.210615                | -1.223439 | 0.000176  |
| 8                | 1                | 0              | 1.007148                | -2.364014 | 0.000051  |
| 9                | 1                | 0              | -0.960991               | 1.426349  | -0.000233 |
| 10               | 1                | 0              | 1.230377                | 2.571314  | -0.000094 |
| 11               | 1                | 0              | 3.329412                | 1.253567  | 0.000127  |
| 12               | 8                | 0              | -1.276510               | -1.217316 | -0.000126 |
| 13               | 1                | 0              | -2.029068               | -0.603808 | -0.000262 |
| 14               | 8                | 0              | -3.518559               | 0.486473  | 0.000071  |
| 15               | 1                | 0              | -4.094700               | 0.492744  | -0.769827 |
| 16               | 1                | 0              | -4.093570               | 0.492634  | 0.770816  |

Rotational constants (GHZ): 4.3158479 1.1226857 0.8947008

#### Phenolate

Electronic Energy -383.378569  
 Stoichiometry C6H7O2(1-)  
 Framework group C1[X(C6H7O2)]  
 Deg. of freedom 39  
 Full point group C1 NOp 1  
 Largest Abelian subgroup C1 NOp 1  
 Largest concise Abelian subgroup C1 NOp 1  
 Standard orientation:

| Center<br>Number | Atomic<br>Number | Atomic<br>Type | Coordinates (Angstroms) |           |           |
|------------------|------------------|----------------|-------------------------|-----------|-----------|
|                  |                  |                | X                       | Y         | Z         |
| 1                | 6                | 0              | 2.184539                | -0.790552 | 0.081527  |
| 2                | 6                | 0              | 0.900642                | -1.300021 | 0.015292  |
| 3                | 6                | 0              | -0.247804               | -0.455780 | -0.073532 |
| 4                | 6                | 0              | 0.031593                | 0.945308  | -0.090793 |
| 5                | 6                | 0              | 1.323211                | 1.435059  | -0.023047 |
| 6                | 6                | 0              | 2.425391                | 0.583721  | 0.064321  |
| 7                | 1                | 0              | 3.023522                | -1.479787 | 0.147850  |
| 8                | 1                | 0              | 0.726346                | -2.371282 | 0.028705  |
| 9                | 1                | 0              | -0.813943               | 1.622193  | -0.159323 |
| 10               | 1                | 0              | 1.479480                | 2.511349  | -0.039811 |
| 11               | 1                | 0              | 3.434599                | 0.976693  | 0.116114  |
| 12               | 8                | 0              | -1.435271               | -0.930860 | -0.133712 |
| 13               | 8                | 0              | -3.671391               | 0.439656  | 0.037503  |
| 14               | 1                | 0              | -3.901676               | 0.205579  | 0.938403  |
| 15               | 1                | 0              | -2.800466               | -0.041517 | -0.104873 |

Rotational constants (GHZ): 4.7601566 1.1053605 0.9020238

#### Thymol

Electronic Energy -541.052726  
 Stoichiometry C10H16O2  
 Framework group C1[X(C10H16O2)]  
 Deg. of freedom 78  
 Full point group C1 NOp 1  
 Largest Abelian subgroup C1 NOp 1  
 Largest concise Abelian subgroup C1 NOp 1  
 Standard orientation:

| Center<br>Number | Atomic<br>Number | Atomic<br>Type | Coordinates (Angstroms) |   |   |
|------------------|------------------|----------------|-------------------------|---|---|
|                  |                  |                | X                       | Y | Z |

|    |   |   |           |           |           |
|----|---|---|-----------|-----------|-----------|
| 1  | 6 | 0 | -2.239615 | 0.479480  | -0.195256 |
| 2  | 1 | 0 | -2.080173 | 1.324302  | -0.871332 |
| 3  | 6 | 0 | -0.921687 | -0.266236 | -0.116622 |
| 4  | 6 | 0 | -0.825218 | -1.648090 | -0.042539 |
| 5  | 6 | 0 | 0.279145  | 0.457872  | -0.092441 |
| 6  | 6 | 0 | 0.400293  | -2.300825 | 0.053698  |
| 7  | 1 | 0 | -1.729517 | -2.243760 | -0.065199 |
| 8  | 6 | 0 | 1.505483  | -0.186664 | -0.001132 |
| 9  | 6 | 0 | 1.582768  | -1.575631 | 0.074786  |
| 10 | 1 | 0 | 0.429466  | -3.383136 | 0.108501  |
| 11 | 1 | 0 | 2.411839  | 0.411237  | 0.010128  |
| 12 | 6 | 0 | -2.614727 | 1.060210  | 1.174736  |
| 13 | 1 | 0 | -3.531754 | 1.652079  | 1.106205  |
| 14 | 1 | 0 | -2.783097 | 0.257484  | 1.898271  |
| 15 | 1 | 0 | -1.821521 | 1.704369  | 1.555458  |
| 16 | 6 | 0 | -3.387350 | -0.358097 | -0.755822 |
| 17 | 1 | 0 | -4.272530 | 0.267304  | -0.893167 |
| 18 | 1 | 0 | -3.131653 | -0.798518 | -1.722076 |
| 19 | 1 | 0 | -3.667829 | -1.168511 | -0.077645 |
| 20 | 6 | 0 | 2.922137  | -2.256445 | 0.174045  |
| 21 | 1 | 0 | 3.548984  | -2.025189 | -0.691089 |
| 22 | 1 | 0 | 3.465385  | -1.933141 | 1.065778  |
| 23 | 1 | 0 | 2.810059  | -3.340198 | 0.225512  |
| 24 | 8 | 0 | 0.194137  | 1.814595  | -0.164099 |
| 25 | 1 | 0 | 1.078119  | 2.215518  | -0.166679 |
| 26 | 8 | 0 | 2.701792  | 3.107260  | -0.174458 |
| 27 | 1 | 0 | 2.917968  | 3.689909  | 0.559363  |
| 28 | 1 | 0 | 2.981440  | 3.561970  | -0.974302 |

-----

Rotational constants (GHZ):            0.9481365            0.6746986            0.4206987

**Thymolate**  
Electronic Energy- -540.577261  
Stoichiometry    C10H15O2(1-)  
Framework group   C1[X(C10H15O2)]  
Deg. of freedom    75  
Full point group        C1    NOp   1  
Largest Abelian subgroup    C1    NOp   1  
Largest concise Abelian subgroup C1    NOp   1  
Standard orientation:

| Center<br>Number | Atomic<br>Number | Atomic<br>Type | Coordinates (Angstroms) |           |           |
|------------------|------------------|----------------|-------------------------|-----------|-----------|
|                  |                  |                | X                       | Y         | Z         |
| 1                | 6                | 0              | -2.206984               | 0.097370  | -0.195215 |
| 2                | 1                | 0              | -2.173081               | 0.963386  | -0.865036 |
| 3                | 6                | 0              | -0.785068               | -0.415285 | -0.111878 |
| 4                | 6                | 0              | -0.455721               | -1.758425 | -0.095460 |
| 5                | 6                | 0              | 0.256897                | 0.571889  | -0.024685 |
| 6                | 6                | 0              | 0.863698                | -2.206758 | 0.003269  |
| 7                | 1                | 0              | -1.246182               | -2.500773 | -0.161889 |
| 8                | 6                | 0              | 1.587442                | 0.081717  | 0.069967  |
| 9                | 6                | 0              | 1.892995                | -1.270671 | 0.083478  |
| 10               | 1                | 0              | 1.082821                | -3.269879 | 0.015906  |
| 11               | 1                | 0              | 2.379575                | 0.822357  | 0.136170  |
| 12               | 6                | 0              | -2.677569               | 0.624211  | 1.166839  |
| 13               | 1                | 0              | -3.671760               | 1.081195  | 1.093227  |
| 14               | 1                | 0              | -2.730238               | -0.191386 | 1.896182  |
| 15               | 1                | 0              | -1.976002               | 1.376285  | 1.528165  |
| 16               | 6                | 0              | -3.210733               | -0.908386 | -0.756384 |
| 17               | 1                | 0              | -4.191307               | -0.437602 | -0.880316 |
| 18               | 1                | 0              | -2.892219               | -1.293414 | -1.728774 |
| 19               | 1                | 0              | -3.344440               | -1.763855 | -0.086336 |
| 20               | 6                | 0              | 3.332709                | -1.721040 | 0.149889  |
| 21               | 1                | 0              | 3.800270                | -1.702379 | -0.840498 |
| 22               | 1                | 0              | 3.922682                | -1.068950 | 0.798847  |
| 23               | 1                | 0              | 3.411494                | -2.742604 | 0.531531  |
| 24               | 8                | 0              | -0.020309               | 1.826054  | -0.030753 |
| 25               | 8                | 0              | 1.699965                | 3.807958  | -0.216702 |
| 26               | 1                | 0              | 1.522611                | 4.058257  | -1.125182 |
| 27               | 1                | 0              | 1.082525                | 3.029546  | -0.071278 |



Rotational constants (GHZ):      0.9019192      0.7205045      0.4275094

## - 2H<sub>2</sub>O/CAM-B3LYP 6-311G+dp/SMD

### H<sub>2</sub>O

Electronic Energy -229.343629

Stoichiometry H<sub>6</sub>O<sub>3</sub>

Framework group C1[X(H<sub>6</sub>O<sub>3</sub>)]

Deg. of freedom 21

Full point group C1 NOp 1

Largest Abelian subgroup C1 NOp 1

Largest concise Abelian subgroup C1 NOp 1

Standard orientation:

| Center<br>Number | Atomic<br>Number | Atomic<br>Type | Coordinates (Angstroms) |           |           |
|------------------|------------------|----------------|-------------------------|-----------|-----------|
|                  |                  |                | X                       | Y         | Z         |
| 1                | 8                | 0              | -0.000187               | 0.940505  | -0.000188 |
| 2                | 1                | 0              | -0.001448               | 1.649190  | -0.656698 |
| 3                | 1                | 0              | 0.003182                | 1.390549  | 0.853531  |
| 4                | 8                | 0              | 2.421254                | -0.481734 | -0.016958 |
| 5                | 1                | 0              | 2.194989                | -1.412321 | 0.079446  |
| 6                | 1                | 0              | 1.564450                | -0.015387 | -0.043160 |
| 7                | 8                | 0              | -2.421563               | -0.482556 | -0.018046 |
| 8                | 1                | 0              | -2.189798               | -1.410520 | 0.089602  |
| 9                | 1                | 0              | -1.567406               | -0.011235 | -0.041188 |

Rotational constants (GHZ):      16.0514252      2.4847890      2.1738153

### OH<sup>-</sup>

Electronic Energy -228.866593

Stoichiometry H<sub>5</sub>O<sub>3</sub>(1-)

Framework group C1[X(H<sub>5</sub>O<sub>3</sub>)]

Deg. of freedom 18

Full point group C1 NOp 1

Largest Abelian subgroup C1 NOp 1

Largest concise Abelian subgroup C1 NOp 1

Standard orientation:

| Center<br>Number | Atomic<br>Number | Atomic<br>Type | Coordinates (Angstroms) |           |           |
|------------------|------------------|----------------|-------------------------|-----------|-----------|
|                  |                  |                | X                       | Y         | Z         |
| 1                | 8                | 0              | -0.000225               | 0.657416  | 0.000044  |
| 2                | 1                | 0              | -0.000769               | 1.616660  | -0.000144 |
| 3                | 8                | 0              | -2.351148               | -0.340430 | 0.086619  |
| 4                | 1                | 0              | -2.355030               | -0.801681 | -0.754038 |
| 5                | 1                | 0              | -1.410034               | 0.086466  | 0.103715  |
| 6                | 8                | 0              | 2.351414                | -0.340291 | -0.086624 |
| 7                | 1                | 0              | 1.410559                | 0.086532  | -0.103892 |
| 8                | 1                | 0              | 2.354945                | -0.801536 | 0.754044  |

Rotational constants (GHZ):      31.7538037      2.6124257      2.4454439

### Phenol

Electronic Energy -460.306017

Stoichiometry C<sub>6</sub>H<sub>10</sub>O<sub>3</sub>

Framework group C1[X(C<sub>6</sub>H<sub>10</sub>O<sub>3</sub>)]

Deg. of freedom 51

Full point group C1 NOp 1

Largest Abelian subgroup C1 NOp 1

Largest concise Abelian subgroup C1 NOp 1

Standard orientation:

| Center<br>Number | Atomic<br>Number | Atomic<br>Type | Coordinates (Angstroms) |           |           |
|------------------|------------------|----------------|-------------------------|-----------|-----------|
|                  |                  |                | X                       | Y         | Z         |
| 1                | 6                | 0              | 2.579260                | -1.016676 | -0.040705 |
| 2                | 6                | 0              | 1.253485                | -1.237462 | -0.379970 |
| 3                | 6                | 0              | 0.346478                | -0.185920 | -0.328551 |
| 4                | 6                | 0              | 0.765128                | 1.081408  | 0.061626  |

|    |   |   |           |           |           |
|----|---|---|-----------|-----------|-----------|
| 5  | 6 | 0 | 2.096200  | 1.289930  | 0.395107  |
| 6  | 6 | 0 | 3.009913  | 0.246168  | 0.347385  |
| 7  | 1 | 0 | 3.283009  | -1.839665 | -0.083224 |
| 8  | 1 | 0 | 0.907538  | -2.215265 | -0.691722 |
| 9  | 1 | 0 | 0.046779  | 1.892161  | 0.109070  |
| 10 | 1 | 0 | 2.417832  | 2.279297  | 0.698418  |
| 11 | 1 | 0 | 4.046814  | 0.414137  | 0.609927  |
| 12 | 8 | 0 | -0.950101 | -0.442795 | -0.665179 |
| 13 | 1 | 0 | -1.485870 | 0.376792  | -0.670092 |
| 14 | 8 | 0 | -2.896718 | 1.394032  | -0.243515 |
| 15 | 1 | 0 | -3.524160 | 1.828118  | -0.825832 |
| 16 | 1 | 0 | -3.367944 | 0.667279  | 0.203110  |
| 17 | 8 | 0 | -3.222605 | -1.107456 | 0.798023  |
| 18 | 1 | 0 | -2.363787 | -1.283333 | 0.378914  |
| 19 | 1 | 0 | -3.707608 | -1.934460 | 0.827446  |

Rotational constants (GHZ):      2.8958025      0.7313665      0.6242864

#### Phenolate

Electronic Energy -459.942619

Stoichiometry C<sub>6</sub>H<sub>9</sub>O<sub>3</sub>(1-)

Framework group C1[X(C<sub>6</sub>H<sub>9</sub>O<sub>3</sub>)]

Deg. of freedom 48

Full point group C1 NOp 1

Largest Abelian subgroup C1 NOp 1

Largest concise Abelian subgroup C1 NOp 1

Standard orientation:

| Center<br>Number | Atomic<br>Number | Atomic<br>Type | Coordinates (Angstroms) |           |           |
|------------------|------------------|----------------|-------------------------|-----------|-----------|
|                  |                  |                | X                       | Y         | Z         |
| 1                | 6                | 0              | -2.253191               | -1.199371 | -0.094639 |
| 2                | 6                | 0              | -0.859724               | -1.208477 | -0.096867 |
| 3                | 6                | 0              | -0.101532               | -0.000162 | -0.001151 |
| 4                | 6                | 0              | -0.859465               | 1.208197  | 0.095724  |
| 5                | 6                | 0              | -2.252956               | 1.199182  | 0.095533  |
| 6                | 6                | 0              | -2.975542               | -0.000052 | 0.000962  |
| 7                | 1                | 0              | -2.788653               | -2.145917 | -0.169196 |
| 8                | 1                | 0              | -0.312317               | -2.145183 | -0.170476 |
| 9                | 1                | 0              | -0.311939               | 2.144890  | 0.168570  |
| 10               | 1                | 0              | -2.788203               | 2.145786  | 0.170885  |
| 11               | 1                | 0              | -4.062832               | -0.000018 | 0.001751  |
| 12               | 8                | 0              | 1.201996                | -0.000265 | -0.002171 |
| 13               | 8                | 0              | 2.836666                | 2.116821  | -0.037236 |
| 14               | 1                | 0              | 3.365086                | 1.868616  | -0.804494 |
| 15               | 1                | 0              | 2.165962                | 1.375378  | 0.030204  |
| 16               | 8                | 0              | 2.838341                | -2.116195 | 0.039205  |
| 17               | 1                | 0              | 2.167163                | -1.375504 | -0.030878 |
| 18               | 1                | 0              | 3.364165                | -1.866836 | 0.807871  |

Rotational constants (GHZ):      2.0697234      0.8518192      0.6062176

#### Thymol

Electronic Energy -617.505458

Stoichiometry C<sub>10</sub>H<sub>18</sub>O<sub>3</sub>

Framework group C1[X(C<sub>10</sub>H<sub>18</sub>O<sub>3</sub>)]

Deg. of freedom 87

Full point group C1 NOp 1

Largest Abelian subgroup C1 NOp 1

Largest concise Abelian subgroup C1 NOp 1

Standard orientation:

| Center<br>Number | Atomic<br>Number | Atomic<br>Type | Coordinates (Angstroms) |           |           |
|------------------|------------------|----------------|-------------------------|-----------|-----------|
|                  |                  |                | X                       | Y         | Z         |
| 1                | 6                | 0              | -0.785067               | -1.492031 | 0.192251  |
| 2                | 6                | 0              | -0.023341               | -0.331594 | 0.211952  |
| 3                | 6                | 0              | -0.595222               | 0.923930  | -0.037569 |
| 4                | 6                | 0              | -1.960493               | 0.949725  | -0.297058 |
| 5                | 6                | 0              | -2.733301               | -0.208301 | -0.313709 |
| 6                | 6                | 0              | -2.153045               | -1.447675 | -0.070821 |
| 7                | 1                | 0              | -0.299290               | -2.443054 | 0.388023  |

|    |   |   |           |           |           |
|----|---|---|-----------|-----------|-----------|
| 8  | 1 | 0 | -2.443799 | 1.898475  | -0.496335 |
| 9  | 8 | 0 | 1.318334  | -0.380488 | 0.481215  |
| 10 | 1 | 0 | 1.638526  | -1.305768 | 0.546185  |
| 11 | 6 | 0 | 0.263023  | 2.173791  | 0.014961  |
| 12 | 1 | 0 | 1.243031  | 1.905550  | -0.389969 |
| 13 | 6 | 0 | 0.472178  | 2.625658  | 1.465688  |
| 14 | 1 | 0 | 0.897199  | 1.828483  | 2.078575  |
| 15 | 1 | 0 | 1.149506  | 3.482868  | 1.507647  |
| 16 | 1 | 0 | -0.480129 | 2.925708  | 1.912500  |
| 17 | 6 | 0 | -0.281439 | 3.326584  | -0.825326 |
| 18 | 1 | 0 | 0.437386  | 4.149344  | -0.832001 |
| 19 | 1 | 0 | -0.457951 | 3.024875  | -1.860520 |
| 20 | 1 | 0 | -1.218910 | 3.716500  | -0.420969 |
| 21 | 6 | 0 | -2.963188 | -2.714843 | -0.092664 |
| 22 | 1 | 0 | -4.020238 | -2.502196 | -0.257446 |
| 23 | 1 | 0 | -2.624908 | -3.384024 | -0.888174 |
| 24 | 1 | 0 | -2.868235 | -3.260058 | 0.849631  |
| 25 | 8 | 0 | 3.850186  | -0.375992 | -0.938890 |
| 26 | 1 | 0 | 2.975222  | -0.022834 | -0.712474 |
| 27 | 1 | 0 | 3.909405  | -0.320594 | -1.899790 |
| 28 | 8 | 0 | 2.809098  | -2.666496 | 0.286197  |
| 29 | 1 | 0 | 3.303530  | -2.961278 | 1.059799  |
| 30 | 1 | 0 | 3.393668  | -2.036962 | -0.178432 |
| 31 | 1 | 0 | -3.795582 | -0.142687 | -0.520664 |

Rotational constants (GHZ):      0.6703512      0.5670809      0.3399319

#### Thymolate

Electronic Energy -617.037656

Stoichiometry C10H17O3(1-)

Framework group C1[X(C10H17O3)]

Deg. of freedom 84

Full point group C1 NOp 1

Largest Abelian subgroup C1 NOp 1

Largest concise Abelian subgroup C1 NOp 1

Standard orientation:

| Center<br>Number | Atomic<br>Number | Atomic<br>Type | Coordinates (Angstroms) |           |           |
|------------------|------------------|----------------|-------------------------|-----------|-----------|
|                  |                  |                | X                       | Y         | Z         |
| 1                | 6                | 0              | -1.548924               | 0.842635  | 0.091914  |
| 2                | 6                | 0              | -0.204408               | 0.432598  | 0.011707  |
| 3                | 6                | 0              | 0.064382                | -0.961051 | -0.100770 |
| 4                | 6                | 0              | -1.009386               | -1.841062 | -0.118963 |
| 5                | 6                | 0              | -2.333854               | -1.412879 | -0.033629 |
| 6                | 6                | 0              | -2.613364               | -0.053820 | 0.070513  |
| 7                | 1                | 0              | -1.747323               | 1.907254  | 0.176329  |
| 8                | 1                | 0              | -0.817588               | -2.905041 | -0.203166 |
| 9                | 1                | 0              | -3.141767               | -2.136211 | -0.050916 |
| 10               | 8                | 0              | 0.766711                | 1.328000  | 0.040331  |
| 11               | 6                | 0              | 1.503475                | -1.436978 | -0.160200 |
| 12               | 1                | 0              | 2.058575                | -0.696962 | -0.742837 |
| 13               | 6                | 0              | 1.687176                | -2.788216 | -0.848776 |
| 14               | 1                | 0              | 1.247027                | -2.796014 | -1.849089 |
| 15               | 1                | 0              | 2.752331                | -3.012212 | -0.948738 |
| 16               | 1                | 0              | 1.236496                | -3.602689 | -0.275622 |
| 17               | 6                | 0              | 2.123902                | -1.474111 | 1.242512  |
| 18               | 1                | 0              | 3.188082                | -1.722271 | 1.193083  |
| 19               | 1                | 0              | 2.024917                | -0.513367 | 1.750972  |
| 20               | 1                | 0              | 1.629543                | -2.233611 | 1.856050  |
| 21               | 6                | 0              | -4.032239               | 0.447312  | 0.140478  |
| 22               | 1                | 0              | -4.160531               | 1.168525  | 0.951151  |
| 23               | 1                | 0              | -4.318142               | 0.951851  | -0.787090 |
| 24               | 1                | 0              | -4.733315               | -0.373517 | 0.301096  |
| 25               | 8                | 0              | 0.391646                | 3.915384  | -0.182111 |
| 26               | 1                | 0              | 0.070527                | 4.089603  | -1.072742 |
| 27               | 1                | 0              | 0.469981                | 2.918819  | -0.115766 |
| 28               | 8                | 0              | 3.405548                | 1.570374  | -0.087435 |
| 29               | 1                | 0              | 2.430055                | 1.388827  | -0.045704 |
| 30               | 1                | 0              | 3.479335                | 2.530381  | -0.072009 |

Rotational constants (GHZ):      0.7419549      0.5837649      0.3467626

**Carvacrol**

Electronic Energy -617.505759

Stoichiometry C<sub>10</sub>H<sub>18</sub>O<sub>3</sub>Framework group C1[X(C<sub>10</sub>H<sub>18</sub>O<sub>3</sub>)]

Deg. of freedom 87

Full point group C1 NOp 1

Largest Abelian subgroup C1 NOp 1

Largest concise Abelian subgroup C1 NOp 1

Standard orientation:

| Center<br>Number            | Atomic<br>Number | Atomic<br>Type | Coordinates (Angstroms) |           |           |
|-----------------------------|------------------|----------------|-------------------------|-----------|-----------|
|                             |                  |                | X                       | Y         | Z         |
| 1                           | 6                | 0              | -0.594602               | 1.533464  | 0.039032  |
| 2                           | 6                | 0              | -0.665704               | 0.175225  | -0.271486 |
| 3                           | 6                | 0              | 0.475397                | -0.617570 | -0.317376 |
| 4                           | 6                | 0              | 1.731006                | -0.084961 | -0.049765 |
| 5                           | 6                | 0              | 1.814808                | 1.271215  | 0.267116  |
| 6                           | 6                | 0              | 0.670292                | 2.054255  | 0.306824  |
| 7                           | 1                | 0              | 2.776511                | 1.721986  | 0.482857  |
| 8                           | 8                | 0              | -1.856181               | -0.443951 | -0.566884 |
| 9                           | 1                | 0              | -2.642352               | 0.092951  | -0.349168 |
| 10                          | 8                | 0              | -3.456434               | -2.570752 | 0.386089  |
| 11                          | 1                | 0              | -3.647241               | -3.251348 | -0.269520 |
| 12                          | 1                | 0              | -2.687585               | -2.086319 | 0.039340  |
| 13                          | 8                | 0              | -4.519010               | 0.028714  | 0.114666  |
| 14                          | 1                | 0              | -4.421666               | -0.937772 | 0.206302  |
| 15                          | 1                | 0              | -5.134069               | 0.158350  | -0.616187 |
| 16                          | 1                | 0              | 0.752388                | 3.108312  | 0.550421  |
| 17                          | 1                | 0              | 0.366580                | -1.668113 | -0.564835 |
| 18                          | 6                | 0              | -1.825395               | 2.394362  | 0.079017  |
| 19                          | 1                | 0              | -2.372881               | 2.358611  | -0.867409 |
| 20                          | 1                | 0              | -2.516569               | 2.075111  | 0.864212  |
| 21                          | 1                | 0              | -1.556505               | 3.432743  | 0.272885  |
| 22                          | 6                | 0              | 2.964498                | -0.965792 | -0.096132 |
| 23                          | 1                | 0              | 2.631738                | -1.967045 | -0.384695 |
| 24                          | 6                | 0              | 3.966727                | -0.483334 | -1.147487 |
| 25                          | 1                | 0              | 4.818784                | -1.165804 | -1.203094 |
| 26                          | 1                | 0              | 3.509574                | -0.430689 | -2.138473 |
| 27                          | 1                | 0              | 4.349988                | 0.509793  | -0.898656 |
| 28                          | 6                | 0              | 3.631343                | -1.071274 | 1.277871  |
| 29                          | 1                | 0              | 2.933417                | -1.444901 | 2.030938  |
| 30                          | 1                | 0              | 4.483745                | -1.754407 | 1.237234  |
| 31                          | 1                | 0              | 3.998909                | -0.097077 | 1.611179  |
| Rotational constants (GHZ): |                  |                | 1.1520898               | 0.3538607 | 0.2912536 |

**Carvacrolate**

Electronic Energy -617.040399

Stoichiometry C<sub>10</sub>H<sub>17</sub>O<sub>3</sub>(1-)Framework group C1[X(C<sub>10</sub>H<sub>17</sub>O<sub>3</sub>)]

Deg. of freedom 84

Full point group C1 NOp 1

Largest Abelian subgroup C1 NOp 1

Largest concise Abelian subgroup C1 NOp 1

Standard orientation:

| Center<br>Number | Atomic<br>Number | Atomic<br>Type | Coordinates (Angstroms) |           |           |
|------------------|------------------|----------------|-------------------------|-----------|-----------|
|                  |                  |                | X                       | Y         | Z         |
| 1                | 6                | 0              | -0.858323               | 1.543109  | -0.214997 |
| 2                | 6                | 0              | -0.914722               | 0.134207  | -0.343178 |
| 3                | 6                | 0              | 0.289862                | -0.588573 | -0.235027 |
| 4                | 6                | 0              | 1.516763                | 0.024214  | -0.004263 |
| 5                | 6                | 0              | 1.552825                | 1.413209  | 0.123393  |
| 6                | 6                | 0              | 0.373970                | 2.144532  | 0.015105  |
| 7                | 1                | 0              | 2.490884                | 1.926212  | 0.302554  |
| 8                | 8                | 0              | -2.064066               | -0.485700 | -0.566812 |
| 9                | 8                | 0              | -4.099175               | -0.346591 | 1.115575  |
| 10               | 1                | 0              | -4.386767               | 0.569268  | 1.189736  |
| 11               | 1                | 0              | -3.323865               | -0.326394 | 0.489902  |
| 12               | 8                | 0              | -2.249665               | -3.110290 | -0.436805 |

|    |   |   |           |           |           |
|----|---|---|-----------|-----------|-----------|
| 13 | 1 | 0 | -2.144075 | -2.115756 | -0.480163 |
| 14 | 1 | 0 | -3.136454 | -3.255360 | -0.090867 |
| 15 | 1 | 0 | 0.243873  | -1.668692 | -0.338717 |
| 16 | 1 | 0 | 0.411610  | 3.226063  | 0.110236  |
| 17 | 6 | 0 | -2.114087 | 2.359826  | -0.337886 |
| 18 | 1 | 0 | -2.634447 | 2.156920  | -1.278507 |
| 19 | 1 | 0 | -2.823600 | 2.139904  | 0.465518  |
| 20 | 1 | 0 | -1.886734 | 3.426756  | -0.299665 |
| 21 | 6 | 0 | 2.779947  | -0.811297 | 0.100885  |
| 22 | 1 | 0 | 2.483030  | -1.856483 | -0.027877 |
| 23 | 6 | 0 | 3.437598  | -0.679453 | 1.476997  |
| 24 | 1 | 0 | 2.743332  | -0.948309 | 2.276885  |
| 25 | 1 | 0 | 4.308879  | -1.335998 | 1.550411  |
| 26 | 1 | 0 | 3.775878  | 0.344985  | 1.654195  |
| 27 | 6 | 0 | 3.780296  | -0.471019 | -1.006989 |
| 28 | 1 | 0 | 4.654024  | -1.125960 | -0.949954 |
| 29 | 1 | 0 | 3.332803  | -0.589929 | -1.996809 |
| 30 | 1 | 0 | 4.130109  | 0.560896  | -0.916770 |

Rotational constants (GHZ):      0.9945305      0.4163322      0.3281564

### 2,3-dimethylphenol

Electronic Energy -538.906764

Stoichiometry C<sub>8</sub>H<sub>14</sub>O<sub>3</sub>

Framework group C1[X(C<sub>8</sub>H<sub>14</sub>O<sub>3</sub>)]

Deg. of freedom 69

Full point group C1 NOp 1

Largest Abelian subgroup C1 NOp 1

Largest concise Abelian subgroup C1 NOp 1

Standard orientation:

| Center<br>Number | Atomic<br>Number | Atomic<br>Type | Coordinates (Angstroms) |           |           |
|------------------|------------------|----------------|-------------------------|-----------|-----------|
|                  |                  |                | X                       | Y         | Z         |
| 1                | 6                | 0              | 0.819750                | 0.566863  | -0.110668 |
| 2                | 6                | 0              | -0.013762               | -0.540401 | -0.292785 |
| 3                | 6                | 0              | 0.476550                | -1.839821 | -0.264785 |
| 4                | 6                | 0              | 1.826082                | -2.049744 | -0.039510 |
| 5                | 6                | 0              | 2.672209                | -0.967252 | 0.159324  |
| 6                | 6                | 0              | 2.184297                | 0.338238  | 0.127730  |
| 7                | 1                | 0              | 2.217986                | -3.059779 | -0.014216 |
| 8                | 1                | 0              | 3.727620                | -1.132244 | 0.342938  |
| 9                | 8                | 0              | -1.361087               | -0.404661 | -0.523849 |
| 10               | 1                | 0              | -1.695446               | 0.503022  | -0.393363 |
| 11               | 8                | 0              | -3.836265               | -1.101435 | 0.673615  |
| 12               | 1                | 0              | -4.422361               | -1.634929 | 0.124575  |
| 13               | 1                | 0              | -2.952387               | -1.200866 | 0.281032  |
| 14               | 8                | 0              | -3.257979               | 1.572318  | 0.014414  |
| 15               | 1                | 0              | -3.711903               | 0.739158  | 0.242813  |
| 16               | 1                | 0              | -3.734992               | 1.926214  | -0.744864 |
| 17               | 1                | 0              | -0.208047               | -2.665800 | -0.415944 |
| 18               | 6                | 0              | 0.238139                | 1.953747  | -0.167404 |
| 19               | 1                | 0              | -0.415903               | 2.074820  | -1.034947 |
| 20               | 1                | 0              | -0.359425               | 2.173717  | 0.722560  |
| 21               | 1                | 0              | 1.014113                | 2.712359  | -0.237399 |
| 22               | 6                | 0              | 3.134849                | 1.484893  | 0.351789  |
| 23               | 1                | 0              | 3.185264                | 2.142881  | -0.519622 |
| 24               | 1                | 0              | 2.829280                | 2.100403  | 1.201499  |
| 25               | 1                | 0              | 4.140170                | 1.112133  | 0.549343  |

Rotational constants (GHZ):      1.5855516      0.5720926      0.4354852

### 2,3-dimethylphenolate

Electronic Energy -538.441423

Stoichiometry C<sub>8</sub>H<sub>13</sub>O<sub>3</sub>(1-)

Framework group C1[X(C<sub>8</sub>H<sub>13</sub>O<sub>3</sub>)]

Deg. of freedom 66

Full point group C1 NOp 1

Largest Abelian subgroup C1 NOp 1

Largest concise Abelian subgroup C1 NOp 1

Standard orientation:

| Center<br>Number | Atomic<br>Number | Atomic<br>Type | Coordinates (Angstroms) |           |           |
|------------------|------------------|----------------|-------------------------|-----------|-----------|
|                  |                  |                | X                       | Y         | Z         |
| 1                | 6                | 0              | 0.152829                | 1.667832  | -0.056207 |
| 2                | 6                | 0              | 0.338462                | 0.299978  | 0.226755  |
| 3                | 6                | 0              | -0.802641               | -0.543209 | 0.243332  |
| 4                | 6                | 0              | -2.067740               | -0.014725 | -0.042078 |
| 5                | 6                | 0              | -2.216196               | 1.344269  | -0.326976 |
| 6                | 6                | 0              | -1.105081               | 2.178434  | -0.328055 |
| 7                | 1                | 0              | 1.022738                | 2.316210  | -0.061234 |
| 8                | 1                | 0              | -3.201111               | 1.740906  | -0.546564 |
| 9                | 8                | 0              | 1.550632                | -0.175377 | 0.473711  |
| 10               | 8                | 0              | 3.682881                | 1.340339  | 0.272240  |
| 11               | 1                | 0              | 3.407092                | 2.261246  | 0.219835  |
| 12               | 1                | 0              | 2.832734                | 0.814167  | 0.347945  |
| 13               | 8                | 0              | 2.524184                | -2.234555 | -0.855159 |
| 14               | 1                | 0              | 2.123671                | -1.467907 | -0.356763 |
| 15               | 1                | 0              | 3.266226                | -1.859704 | -1.340639 |
| 16               | 1                | 0              | -1.220751               | 3.235088  | -0.546157 |
| 17               | 6                | 0              | -0.635938               | -2.005470 | 0.560446  |
| 18               | 1                | 0              | -0.598437               | -2.617787 | -0.347373 |
| 19               | 1                | 0              | 0.290035                | -2.181206 | 1.106351  |
| 20               | 1                | 0              | -1.463293               | -2.382477 | 1.164481  |
| 21               | 6                | 0              | -3.282786               | -0.906134 | -0.047670 |
| 22               | 1                | 0              | -3.163485               | -1.744943 | -0.738855 |
| 23               | 1                | 0              | -3.471549               | -1.335784 | 0.940394  |
| 24               | 1                | 0              | -4.170898               | -0.346922 | -0.345048 |

Rotational constants (GHZ): 1.3746703 0.6761481 0.4800811

## 2,4-dimethylphenol

Electronic Energy -538.907743

Stoichiometry C8H14O3

Framework group C1[X(C8H14O3)]

Deg. of freedom 69

Full point group C1 NOp 1

Largest Abelian subgroup C1 NOp 1

Largest concise Abelian subgroup C1 NOp 1

Standard orientation:

| Center<br>Number | Atomic<br>Number | Atomic<br>Type | Coordinates (Angstroms) |           |           |
|------------------|------------------|----------------|-------------------------|-----------|-----------|
|                  |                  |                | X                       | Y         | Z         |
| 1                | 6                | 0              | 0.535176                | 0.957472  | -0.073725 |
| 2                | 6                | 0              | -0.079400               | -0.275041 | -0.308953 |
| 3                | 6                | 0              | 0.666905                | -1.443507 | -0.348757 |
| 4                | 6                | 0              | 2.039280                | -1.401137 | -0.146857 |
| 5                | 6                | 0              | 2.687143                | -0.194394 | 0.101514  |
| 6                | 6                | 0              | 1.913363                | 0.964310  | 0.128196  |
| 7                | 1                | 0              | 2.611027                | -2.322046 | -0.183191 |
| 8                | 8                | 0              | -1.430984               | -0.389442 | -0.535628 |
| 9                | 1                | 0              | -1.931207               | 0.425257  | -0.338341 |
| 10               | 8                | 0              | -3.705379               | -1.640877 | 0.589181  |
| 11               | 1                | 0              | -4.186204               | -2.238607 | 0.005243  |
| 12               | 1                | 0              | -2.829973               | -1.527525 | 0.180941  |
| 13               | 8                | 0              | -3.657215               | 1.145655  | 0.157791  |
| 14               | 1                | 0              | -3.953072               | 0.230420  | 0.320381  |
| 15               | 1                | 0              | -4.202328               | 1.467603  | -0.569289 |
| 16               | 1                | 0              | 2.398731                | 1.918608  | 0.308906  |
| 17               | 1                | 0              | 0.162279                | -2.383102 | -0.541873 |
| 18               | 6                | 0              | -0.261883               | 2.231367  | -0.048330 |
| 19               | 1                | 0              | -0.809997               | 2.379917  | -0.983267 |
| 20               | 1                | 0              | -0.997818               | 2.228826  | 0.760622  |
| 21               | 1                | 0              | 0.394544                | 3.088884  | 0.098091  |
| 22               | 6                | 0              | 4.169387                | -0.140781 | 0.357212  |
| 23               | 1                | 0              | 4.608552                | 0.775073  | -0.042931 |
| 24               | 1                | 0              | 4.385195                | -0.163794 | 1.429663  |
| 25               | 1                | 0              | 4.679072                | -0.991943 | -0.097510 |

Rotational constants (GHZ): 1.9065578 0.4928341 0.4040927

**2,4-dimethylphenolate**

Electronic Energy -538.441994

Stoichiometry C<sub>8</sub>H<sub>13</sub>O<sub>3</sub>(1-)Framework group C1[X(C<sub>8</sub>H<sub>13</sub>O<sub>3</sub>)]

Deg. of freedom 66

Full point group C1 NOp 1

Largest Abelian subgroup C1 NOp 1

Largest concise Abelian subgroup C1 NOp 1

Standard orientation:

| Center<br>Number            | Atomic<br>Number | Atomic<br>Type | Coordinates (Angstroms) |           |           |
|-----------------------------|------------------|----------------|-------------------------|-----------|-----------|
|                             |                  |                | X                       | Y         | Z         |
| 1                           | 6                | 0              | 0.232082                | 1.318657  | 0.162554  |
| 2                           | 6                | 0              | -0.394301               | 0.115388  | -0.197258 |
| 3                           | 6                | 0              | 0.431412                | -1.022598 | -0.381506 |
| 4                           | 6                | 0              | 1.803704                | -0.908541 | -0.200908 |
| 5                           | 6                | 0              | 2.426830                | 0.290121  | 0.158248  |
| 6                           | 6                | 0              | 1.610411                | 1.401037  | 0.334652  |
| 7                           | 1                | 0              | -0.384920               | 2.199697  | 0.307983  |
| 8                           | 1                | 0              | 2.417112                | -1.794027 | -0.348886 |
| 9                           | 8                | 0              | -1.709170               | 0.035973  | -0.364570 |
| 10                          | 8                | 0              | -3.120570               | 2.232360  | -0.600363 |
| 11                          | 1                | 0              | -2.649558               | 2.939131  | -0.146995 |
| 12                          | 1                | 0              | -2.543497               | 1.418966  | -0.489377 |
| 13                          | 8                | 0              | -3.118306               | -1.491664 | 1.265062  |
| 14                          | 1                | 0              | -2.568952               | -0.924346 | 0.655022  |
| 15                          | 1                | 0              | -3.628948               | -0.872715 | 1.797094  |
| 16                          | 1                | 0              | 2.054217                | 2.352049  | 0.613696  |
| 17                          | 6                | 0              | -0.192354               | -2.330787 | -0.777702 |
| 18                          | 1                | 0              | -0.902905               | -2.683437 | -0.025091 |
| 19                          | 1                | 0              | -0.749989               | -2.239405 | -1.714528 |
| 20                          | 1                | 0              | 0.569993                | -3.100431 | -0.910097 |
| 21                          | 6                | 0              | 3.919860                | 0.361824  | 0.346784  |
| 22                          | 1                | 0              | 4.256411                | -0.296107 | 1.153362  |
| 23                          | 1                | 0              | 4.455547                | 0.059330  | -0.557502 |
| 24                          | 1                | 0              | 4.233993                | 1.377340  | 0.595112  |
| Rotational constants (GHZ): |                  |                | 1.4141500               | 0.5965428 | 0.4634363 |

**2,6-diisopropylphenol**

Electronic Energy -696.099286

Stoichiometry C<sub>12</sub>H<sub>22</sub>O<sub>3</sub>Framework group C1[X(C<sub>12</sub>H<sub>22</sub>O<sub>3</sub>)]

Deg. of freedom 105

Full point group C1 NOp 1

Largest Abelian subgroup C1 NOp 1

Largest concise Abelian subgroup C1 NOp 1

Standard orientation:

| Center<br>Number | Atomic<br>Number | Atomic<br>Type | Coordinates (Angstroms) |           |           |
|------------------|------------------|----------------|-------------------------|-----------|-----------|
|                  |                  |                | X                       | Y         | Z         |
| 1                | 6                | 0              | 1.117396                | -1.021888 | -0.079110 |
| 2                | 6                | 0              | -0.059336               | -0.266160 | -0.133653 |
| 3                | 6                | 0              | -1.329336               | -0.855185 | -0.117149 |
| 4                | 6                | 0              | -1.401326               | -2.240179 | -0.035297 |
| 5                | 6                | 0              | -0.253509               | -3.015761 | 0.023384  |
| 6                | 6                | 0              | 0.989566                | -2.405927 | -0.001396 |
| 7                | 1                | 0              | -2.369126               | -2.724927 | -0.026571 |
| 8                | 1                | 0              | -0.328227               | -4.094759 | 0.082251  |
| 9                | 8                | 0              | -0.028055               | 1.102016  | -0.199083 |
| 10               | 1                | 0              | 0.856668                | 1.476925  | -0.359194 |
| 11               | 8                | 0              | -0.845787               | 3.742564  | -0.106490 |
| 12               | 1                | 0              | -1.323768               | 4.110059  | 0.640522  |
| 13               | 1                | 0              | -0.937047               | 2.776469  | -0.053148 |
| 14               | 8                | 0              | 1.790018                | 3.110565  | -0.526348 |
| 15               | 1                | 0              | 0.979678                | 3.636725  | -0.389644 |
| 16               | 1                | 0              | 2.242963                | 3.489411  | -1.283117 |
| 17               | 1                | 0              | 1.879523                | -3.020594 | 0.037492  |
| 18               | 6                | 0              | -2.562322               | 0.028687  | -0.162134 |
| 19               | 1                | 0              | -2.332222               | 0.856323  | -0.839066 |

|    |   |   |           |           |           |
|----|---|---|-----------|-----------|-----------|
| 20 | 6 | 0 | -2.850961 | 0.624183  | 1.223221  |
| 21 | 1 | 0 | -1.977828 | 1.140753  | 1.625810  |
| 22 | 1 | 0 | -3.682729 | 1.332694  | 1.176710  |
| 23 | 1 | 0 | -3.121409 | -0.165945 | 1.928736  |
| 24 | 6 | 0 | -3.805197 | -0.671816 | -0.708622 |
| 25 | 1 | 0 | -4.617238 | 0.049475  | -0.825344 |
| 26 | 1 | 0 | -3.615120 | -1.126653 | -1.682882 |
| 27 | 1 | 0 | -4.162477 | -1.452961 | -0.032885 |
| 28 | 6 | 0 | 2.473554  | -0.336215 | -0.057428 |
| 29 | 1 | 0 | 2.429318  | 0.529117  | -0.727970 |
| 30 | 6 | 0 | 2.794371  | 0.187419  | 1.349601  |
| 31 | 1 | 0 | 3.736090  | 0.741235  | 1.350524  |
| 32 | 1 | 0 | 2.015256  | 0.854872  | 1.720588  |
| 33 | 1 | 0 | 2.885139  | -0.647045 | 2.049844  |
| 34 | 6 | 0 | 3.614746  | -1.212547 | -0.573334 |
| 35 | 1 | 0 | 3.393276  | -1.624325 | -1.560020 |
| 36 | 1 | 0 | 4.529934  | -0.621354 | -0.649150 |
| 37 | 1 | 0 | 3.824061  | -2.044314 | 0.103391  |

Rotational constants (GHZ):      0.5782226      0.4700602      0.2833303

### 2,6-diisopropylphenolate

Electronic Energy -695.632393

Stoichiometry C12H21O3(1-)

Framework group C1[X(C12H21O3)]

Deg. of freedom 102

Full point group C1 NOp 1

Largest Abelian subgroup C1 NOp 1

Largest concise Abelian subgroup C1 NOp 1

Standard orientation:

| Center<br>Number | Atomic<br>Number | Atomic<br>Type | Coordinates (Angstroms) |           |           |
|------------------|------------------|----------------|-------------------------|-----------|-----------|
|                  |                  |                | X                       | Y         | Z         |
| 1                | 6                | 0              | 1.399820                | -0.600415 | -0.013362 |
| 2                | 6                | 0              | 0.082038                | -0.064138 | 0.017880  |
| 3                | 6                | 0              | -1.021801               | -0.944442 | -0.124690 |
| 4                | 6                | 0              | -0.792860               | -2.308204 | -0.277359 |
| 5                | 6                | 0              | 0.493385                | -2.833560 | -0.297048 |
| 6                | 6                | 0              | 1.575810                | -1.971865 | -0.167329 |
| 7                | 1                | 0              | -1.635671               | -2.980795 | -0.388259 |
| 8                | 1                | 0              | 0.649718                | -3.899392 | -0.418974 |
| 9                | 8                | 0              | -0.097854               | 1.234347  | 0.187804  |
| 10               | 8                | 0              | 0.590990                | 2.917223  | -1.772933 |
| 11               | 1                | 0              | -0.172067               | 3.499436  | -1.865021 |
| 12               | 1                | 0              | 0.334654                | 2.290981  | -1.043292 |
| 13               | 8                | 0              | -2.004239               | 3.061329  | 0.472367  |
| 14               | 1                | 0              | -1.359802               | 2.306497  | 0.411868  |
| 15               | 1                | 0              | -2.726751               | 2.738923  | 1.029931  |
| 16               | 1                | 0              | 2.579346                | -2.381849 | -0.186826 |
| 17               | 6                | 0              | -2.425800               | -0.370712 | -0.074077 |
| 18               | 1                | 0              | -2.383424               | 0.611007  | -0.551782 |
| 19               | 6                | 0              | -3.469279               | -1.196564 | -0.824747 |
| 20               | 1                | 0              | -3.642863               | -2.165404 | -0.349439 |
| 21               | 1                | 0              | -4.424437               | -0.664666 | -0.836351 |
| 22               | 1                | 0              | -3.173000               | -1.377116 | -1.861040 |
| 23               | 6                | 0              | -2.875284               | -0.157771 | 1.378406  |
| 24               | 1                | 0              | -2.155879               | 0.443701  | 1.937663  |
| 25               | 1                | 0              | -3.844347               | 0.348892  | 1.418662  |
| 26               | 1                | 0              | -2.979063               | -1.120445 | 1.888808  |
| 27               | 6                | 0              | 2.581009                | 0.335554  | 0.175328  |
| 28               | 1                | 0              | 2.310749                | 1.286785  | -0.287956 |
| 29               | 6                | 0              | 3.870909                | -0.144380 | -0.487205 |
| 30               | 1                | 0              | 4.638714                | 0.630097  | -0.410821 |
| 31               | 1                | 0              | 4.267739                | -1.042829 | -0.007682 |
| 32               | 1                | 0              | 3.720754                | -0.365315 | -1.547092 |
| 33               | 6                | 0              | 2.820536                | 0.608652  | 1.666084  |
| 34               | 1                | 0              | 3.618305                | 1.343924  | 1.807402  |
| 35               | 1                | 0              | 1.919412                | 0.991961  | 2.148884  |
| 36               | 1                | 0              | 3.115839                | -0.310516 | 2.182139  |

Rotational constants (GHZ):      0.6370146      0.4360955      0.3096368



**2-methyl-4-terz-butylphenol**

Electronic Energy -656.802064

Stoichiometry C11H20O3

Framework group C1[X(C11H20O3)]

Deg. of freedom 96

Full point group C1 NOp 1

Largest Abelian subgroup C1 NOp 1

Largest concise Abelian subgroup C1 NOp 1

Standard orientation:

| Center<br>Number | Atomic<br>Number | Atomic<br>Type | Coordinates (Angstroms) |           |           |
|------------------|------------------|----------------|-------------------------|-----------|-----------|
|                  |                  |                | X                       | Y         | Z         |
| 1                | 6                | 0              | 0.990122                | -1.380127 | -0.304095 |
| 2                | 6                | 0              | -0.389534               | -1.429986 | -0.467179 |
| 3                | 6                | 0              | -1.145936               | -0.273619 | -0.385728 |
| 4                | 6                | 0              | -0.532753               | 0.959124  | -0.143676 |
| 5                | 6                | 0              | 0.848504                | 0.972817  | 0.018135  |
| 6                | 6                | 0              | 1.641974                | -0.175734 | -0.054362 |
| 7                | 1                | 0              | 1.546643                | -2.304953 | -0.373950 |
| 8                | 1                | 0              | -0.888599               | -2.372966 | -0.658695 |
| 9                | 1                | 0              | 1.316749                | 1.932745  | 0.206672  |
| 10               | 8                | 0              | -2.502825               | -0.396019 | -0.571712 |
| 11               | 1                | 0              | -3.003116               | 0.412395  | -0.350452 |
| 12               | 8                | 0              | -4.724068               | 1.109132  | 0.208009  |
| 13               | 1                | 0              | -5.305495               | 1.398726  | -0.504344 |
| 14               | 1                | 0              | -4.989400               | 0.191196  | 0.403746  |
| 15               | 8                | 0              | -4.679814               | -1.670238 | 0.711090  |
| 16               | 1                | 0              | -3.827045               | -1.542107 | 0.261221  |
| 17               | 1                | 0              | -5.167787               | -2.294381 | 0.161717  |
| 18               | 6                | 0              | 3.158347                | -0.069084 | 0.138714  |
| 19               | 6                | 0              | 3.748940                | 0.870541  | -0.924586 |
| 20               | 1                | 0              | 3.324329                | 1.874154  | -0.856688 |
| 21               | 1                | 0              | 4.831170                | 0.954892  | -0.792333 |
| 22               | 1                | 0              | 3.559384                | 0.489068  | -1.931401 |
| 23               | 6                | 0              | 3.459466                | 0.499907  | 1.534456  |
| 24               | 1                | 0              | 3.058532                | -0.150909 | 2.316023  |
| 25               | 1                | 0              | 4.539844                | 0.581662  | 1.682719  |
| 26               | 1                | 0              | 3.026973                | 1.493786  | 1.666185  |
| 27               | 6                | 0              | 3.852431                | -1.427951 | 0.015403  |
| 28               | 1                | 0              | 3.498290                | -2.135309 | 0.769157  |
| 29               | 1                | 0              | 3.699773                | -1.874447 | -0.970150 |
| 30               | 1                | 0              | 4.927798                | -1.299229 | 0.159475  |
| 31               | 6                | 0              | -1.338758               | 2.225486  | -0.065739 |
| 32               | 1                | 0              | -1.918142               | 2.388539  | -0.979192 |
| 33               | 1                | 0              | -2.048172               | 2.200264  | 0.766251  |
| 34               | 1                | 0              | -0.684884               | 3.085633  | 0.076900  |

Rotational constants (GHZ):      1.3473956      0.2736855      0.2449341

**2-methyl-4-terz-butylphenolate**

Electronic Energy -656.336205

Stoichiometry C11H19O3(1-)

Framework group C1[X(C11H19O3)]

Deg. of freedom 93

Full point group C1 NOp 1

Largest Abelian subgroup C1 NOp 1

Largest concise Abelian subgroup C1 NOp 1

Standard orientation:

| Center<br>Number | Atomic<br>Number | Atomic<br>Type | Coordinates (Angstroms) |           |           |
|------------------|------------------|----------------|-------------------------|-----------|-----------|
|                  |                  |                | X                       | Y         | Z         |
| 1                | 6                | 0              | -0.759257               | 1.037085  | 0.238464  |
| 2                | 6                | 0              | 0.618102                | 1.106572  | 0.395219  |
| 3                | 6                | 0              | 1.390266                | -0.080605 | 0.329295  |
| 4                | 6                | 0              | 0.701369                | -1.280897 | 0.104921  |
| 5                | 6                | 0              | -0.682182               | -1.317526 | -0.047801 |
| 6                | 6                | 0              | -1.451800               | -0.159840 | 0.012989  |
| 7                | 1                | 0              | -1.315867               | 1.967594  | 0.296943  |
| 8                | 1                | 0              | 1.271708                | -2.202930 | 0.051586  |
| 9                | 1                | 0              | -1.150882               | -2.278860 | -0.218004 |

|    |   |   |           |           |           |
|----|---|---|-----------|-----------|-----------|
| 10 | 8 | 0 | 2.708732  | -0.046550 | 0.479140  |
| 11 | 8 | 0 | 4.132363  | -2.245467 | 0.311679  |
| 12 | 1 | 0 | 3.546947  | -2.964695 | 0.052872  |
| 13 | 1 | 0 | 3.542153  | -1.436845 | 0.373193  |
| 14 | 8 | 0 | 4.216650  | 1.218949  | -1.285527 |
| 15 | 1 | 0 | 3.623630  | 0.763322  | -0.625909 |
| 16 | 1 | 0 | 4.815316  | 0.533066  | -1.599030 |
| 17 | 6 | 0 | -2.975940 | -0.148480 | -0.148707 |
| 18 | 6 | 0 | -3.630353 | 0.416801  | 1.122472  |
| 19 | 1 | 0 | -3.299766 | 1.437636  | 1.325259  |
| 20 | 1 | 0 | -4.718893 | 0.432645  | 1.014810  |
| 21 | 1 | 0 | -3.385212 | -0.197202 | 1.993292  |
| 22 | 6 | 0 | -3.366231 | 0.735768  | -1.344183 |
| 23 | 1 | 0 | -2.930377 | 0.352901  | -2.270939 |
| 24 | 1 | 0 | -4.453436 | 0.754992  | -1.463986 |
| 25 | 1 | 0 | -3.026277 | 1.764974  | -1.211323 |
| 26 | 6 | 0 | -3.540393 | -1.551133 | -0.390474 |
| 27 | 1 | 0 | -3.137173 | -1.999923 | -1.301568 |
| 28 | 1 | 0 | -3.327104 | -2.224247 | 0.443481  |
| 29 | 1 | 0 | -4.626114 | -1.492654 | -0.501008 |
| 30 | 6 | 0 | 1.303620  | 2.421377  | 0.640909  |
| 31 | 1 | 0 | 1.872663  | 2.406797  | 1.575233  |
| 32 | 1 | 0 | 2.016158  | 2.659322  | -0.153995 |
| 33 | 1 | 0 | 0.577361  | 3.233930  | 0.698124  |

Rotational constants (GHZ):      1.1197465      0.3119300      0.2710460

#### 4-bromothymol

Electronic Energy -3191.151201

Stoichiometry C10H17BrO3

Framework group C1[X(C10H17BrO3)]

Deg. of freedom 87

Full point group C1 NOp 1

Largest Abelian subgroup C1 NOp 1

Largest concise Abelian subgroup C1 NOp 1

Standard orientation:

| Center<br>Number | Atomic<br>Number | Atomic<br>Type | Coordinates (Angstroms) |           |           |
|------------------|------------------|----------------|-------------------------|-----------|-----------|
|                  |                  |                | X                       | Y         | Z         |
| 1                | 6                | 0              | -0.467162               | -1.409828 | -0.371235 |
| 2                | 6                | 0              | -1.198622               | -0.230875 | -0.312842 |
| 3                | 6                | 0              | -0.570411               | 1.000055  | -0.089699 |
| 4                | 6                | 0              | 0.810343                | 0.986107  | 0.064824  |
| 5                | 6                | 0              | 1.531301                | -0.197437 | 0.000810  |
| 6                | 6                | 0              | 0.917611                | -1.426236 | -0.217659 |
| 7                | 1                | 0              | -0.989562               | -2.344684 | -0.542727 |
| 8                | 1                | 0              | 1.336562                | 1.914539  | 0.240530  |
| 9                | 8                | 0              | -2.554620               | -0.239417 | -0.471170 |
| 10               | 1                | 0              | -2.897647               | -1.153052 | -0.590717 |
| 11               | 6                | 0              | -1.384759               | 2.279094  | -0.060333 |
| 12               | 1                | 0              | -2.337472               | 2.035595  | 0.417798  |
| 13               | 6                | 0              | -1.690199               | 2.752777  | -1.486751 |
| 14               | 1                | 0              | -2.189083               | 1.977199  | -2.070811 |
| 15               | 1                | 0              | -2.338920               | 3.632378  | -1.467339 |
| 16               | 1                | 0              | -0.765875               | 3.025775  | -2.003895 |
| 17               | 6                | 0              | -0.737203               | 3.402351  | 0.745530  |
| 18               | 1                | 0              | -1.427614               | 4.245599  | 0.819991  |
| 19               | 1                | 0              | -0.486382               | 3.081335  | 1.759296  |
| 20               | 1                | 0              | 0.175161                | 3.770065  | 0.269154  |
| 21               | 6                | 0              | 1.669788                | -2.722821 | -0.289706 |
| 22               | 1                | 0              | 2.210882                | -2.920637 | 0.638455  |
| 23               | 1                | 0              | 0.983754                | -3.550564 | -0.468027 |
| 24               | 1                | 0              | 2.407326                | -2.709605 | -1.095497 |
| 25               | 8                | 0              | -4.706642               | -0.692025 | 1.516195  |
| 26               | 1                | 0              | -3.939942               | -0.221121 | 1.154912  |
| 27               | 1                | 0              | -4.504280               | -0.832791 | 2.448543  |
| 28               | 8                | 0              | -3.940549               | -2.587283 | -0.387446 |
| 29               | 1                | 0              | -4.590240               | -2.735724 | -1.084465 |
| 30               | 1                | 0              | -4.417854               | -2.122140 | 0.326421  |
| 31               | 35               | 0              | 3.431473                | -0.101185 | 0.231146  |

Rotational constants (GHZ):      0.6272509      0.2499845      0.1938929

#### 4-bromothymolate

Electronic Energy -3190.685396

Stoichiometry C10H16BrO3(1-)

Framework group C1[X(C10H16BrO3)]

Deg. of freedom 84

Full point group C1 NOp 1

Largest Abelian subgroup C1 NOp 1

Largest concise Abelian subgroup C1 NOp 1

Standard orientation:

| Center<br>Number | Atomic<br>Number | Atomic<br>Type | Coordinates (Angstroms) |           |           |
|------------------|------------------|----------------|-------------------------|-----------|-----------|
|                  |                  |                | X                       | Y         | Z         |
| 1                | 6                | 0              | 1.711932                | 1.915457  | -0.157654 |
| 2                | 1                | 0              | 2.556138                | 1.599423  | -0.775886 |
| 3                | 6                | 0              | 0.729630                | 0.760895  | -0.141535 |
| 4                | 6                | 0              | -0.640866               | 0.967805  | -0.073935 |
| 5                | 6                | 0              | 1.217178                | -0.574071 | -0.159529 |
| 6                | 6                | 0              | -1.537182               | -0.091542 | -0.024700 |
| 7                | 1                | 0              | -1.026411               | 1.979175  | -0.061177 |
| 8                | 6                | 0              | 0.272488                | -1.618038 | -0.115162 |
| 9                | 6                | 0              | -1.102643               | -1.412950 | -0.046280 |
| 10               | 1                | 0              | 0.644389                | -2.637541 | -0.137126 |
| 11               | 6                | 0              | 2.249604                | 2.186372  | 1.253263  |
| 12               | 1                | 0              | 3.031579                | 2.950671  | 1.232338  |
| 13               | 1                | 0              | 1.445461                | 2.544565  | 1.903273  |
| 14               | 1                | 0              | 2.670301                | 1.284863  | 1.702441  |
| 15               | 6                | 0              | 1.154596                | 3.201324  | -0.765049 |
| 16               | 1                | 0              | 1.947736                | 3.949207  | -0.842356 |
| 17               | 1                | 0              | 0.751729                | 3.033547  | -1.766980 |
| 18               | 1                | 0              | 0.360966                | 3.632783  | -0.149315 |
| 19               | 6                | 0              | -2.041209               | -2.585355 | -0.003624 |
| 20               | 1                | 0              | -2.732623               | -2.574056 | -0.849752 |
| 21               | 1                | 0              | -1.482636               | -3.521126 | -0.032754 |
| 22               | 1                | 0              | -2.648427               | -2.578485 | 0.904818  |
| 23               | 8                | 0              | 2.504822                | -0.845603 | -0.223343 |
| 24               | 8                | 0              | 3.439457                | -3.279685 | 0.120881  |
| 25               | 1                | 0              | 2.710208                | -3.904229 | 0.049375  |
| 26               | 1                | 0              | 3.026182                | -2.378519 | -0.014766 |
| 27               | 8                | 0              | 4.892027                | 0.320376  | -0.129314 |
| 28               | 1                | 0              | 3.965313                | -0.033277 | -0.152421 |
| 29               | 1                | 0              | 5.453893                | -0.457722 | -0.051755 |
| 30               | 35               | 0              | -3.412726               | 0.315732  | 0.065757  |

Rotational constants (GHZ):      0.6895737      0.2564481      0.1930398

#### 4-chlorothymol

Electronic Energy -1077.133037

Stoichiometry C10H17ClO3

Framework group C1[X(C10H17ClO3)]

Deg. of freedom 87

Full point group C1 NOp 1

Largest Abelian subgroup C1 NOp 1

Largest concise Abelian subgroup C1 NOp 1

Standard orientation:

| Center<br>Number | Atomic<br>Number | Atomic<br>Type | Coordinates (Angstroms) |           |           |
|------------------|------------------|----------------|-------------------------|-----------|-----------|
|                  |                  |                | X                       | Y         | Z         |
| 1                | 6                | 0              | 0.058158                | -1.426434 | -0.334392 |
| 2                | 6                | 0              | -0.650727               | -0.232568 | -0.299024 |
| 3                | 6                | 0              | -0.005852               | 0.986136  | -0.056485 |
| 4                | 6                | 0              | 1.368819                | 0.945871  | 0.140679  |
| 5                | 6                | 0              | 2.065090                | -0.252000 | 0.098900  |
| 6                | 6                | 0              | 1.436205                | -1.468701 | -0.137548 |
| 7                | 1                | 0              | -0.476800               | -2.350991 | -0.521875 |
| 8                | 1                | 0              | 1.913421                | 1.860563  | 0.333073  |
| 9                | 8                | 0              | -2.001473               | -0.214288 | -0.499698 |
| 10               | 1                | 0              | -2.358165               | -1.121579 | -0.625570 |
| 11               | 6                | 0              | -0.796081               | 2.280376  | -0.051625 |

|    |    |   |           |           |           |
|----|----|---|-----------|-----------|-----------|
| 12 | 1  | 0 | -1.767751 | 2.055023  | 0.396269  |
| 13 | 6  | 0 | -1.047732 | 2.759868  | -1.486607 |
| 14 | 1  | 0 | -1.543088 | 1.993855  | -2.086110 |
| 15 | 1  | 0 | -1.679605 | 3.651858  | -1.486850 |
| 16 | 1  | 0 | -0.102674 | 3.014874  | -1.974616 |
| 17 | 6  | 0 | -0.152472 | 3.390630  | 0.775092  |
| 18 | 1  | 0 | -0.828660 | 4.246862  | 0.829159  |
| 19 | 1  | 0 | 0.060653  | 3.064278  | 1.795736  |
| 20 | 1  | 0 | 0.781002  | 3.741219  | 0.327567  |
| 21 | 6  | 0 | 2.176547  | -2.772905 | -0.182571 |
| 22 | 1  | 0 | 2.686800  | -2.971939 | 0.762809  |
| 23 | 1  | 0 | 1.488088  | -3.594339 | -0.379436 |
| 24 | 1  | 0 | 2.938721  | -2.768856 | -0.965392 |
| 25 | 8  | 0 | -4.199541 | -0.615666 | 1.444133  |
| 26 | 1  | 0 | -3.416779 | -0.161293 | 1.096194  |
| 27 | 1  | 0 | -4.014253 | -0.764892 | 2.378727  |
| 28 | 8  | 0 | -3.440012 | -2.533058 | -0.437955 |
| 29 | 1  | 0 | -4.077822 | -2.666888 | -1.148743 |
| 30 | 1  | 0 | -3.920021 | -2.050409 | 0.262528  |
| 31 | 17 | 0 | 3.807848  | -0.207935 | 0.362128  |

-----  
Rotational constants (GHZ):      0.6307636      0.3539315      0.2509656

#### 4-chlorothymolate

Electronic Energy -1076.667182

Stoichiometry C10H16ClO3(1-)

Framework group C1[X(C10H16ClO3)]

Deg. of freedom 84

Full point group C1 NOp 1

Largest Abelian subgroup C1 NOp 1

Largest concise Abelian subgroup C1 NOp 1

Standard orientation:

| Center<br>Number | Atomic<br>Number | Atomic<br>Type | Coordinates (Angstroms) |           |           |
|------------------|------------------|----------------|-------------------------|-----------|-----------|
|                  |                  |                | X                       | Y         | Z         |
| 1                | 6                | 0              | 0.392473                | -1.535816 | -0.126366 |
| 2                | 6                | 0              | -0.627560               | -0.565854 | -0.186524 |
| 3                | 6                | 0              | -0.244536               | 0.802339  | -0.150893 |
| 4                | 6                | 0              | 1.104147                | 1.113727  | -0.050481 |
| 5                | 6                | 0              | 2.074467                | 0.124412  | 0.013653  |
| 6                | 6                | 0              | 1.744982                | -1.225672 | -0.024550 |
| 7                | 1                | 0              | 0.099787                | -2.580390 | -0.161779 |
| 8                | 1                | 0              | 1.416706                | 2.150079  | -0.021339 |
| 9                | 8                | 0              | -1.889395               | -0.934257 | -0.280363 |
| 10               | 6                | 0              | -1.310650               | 1.879396  | -0.182161 |
| 11               | 1                | 0              | -2.130053               | 1.491052  | -0.792325 |
| 12               | 6                | 0              | -0.850305               | 3.192505  | -0.812598 |
| 13               | 1                | 0              | -0.439165               | 3.037407  | -1.813199 |
| 14               | 1                | 0              | -1.695672               | 3.879762  | -0.898892 |
| 15               | 1                | 0              | -0.088180               | 3.690386  | -0.207378 |
| 16               | 6                | 0              | -1.863739               | 2.132461  | 1.226022  |
| 17               | 1                | 0              | -2.700648               | 2.835867  | 1.195694  |
| 18               | 1                | 0              | -2.215019               | 1.209285  | 1.690769  |
| 19               | 1                | 0              | -1.087177               | 2.559734  | 1.867746  |
| 20               | 6                | 0              | 2.779377                | -2.313172 | 0.036580  |
| 21               | 1                | 0              | 2.304698                | -3.293387 | -0.009857 |
| 22               | 1                | 0              | 3.487478                | -2.236982 | -0.792338 |
| 23               | 1                | 0              | 3.361040                | -2.258837 | 0.960140  |
| 24               | 8                | 0              | -2.635100               | -3.429411 | 0.076723  |
| 25               | 1                | 0              | -1.904350               | -4.007595 | -0.165618 |
| 26               | 1                | 0              | -2.292762               | -2.500064 | -0.067712 |
| 27               | 8                | 0              | -4.367374               | -0.011433 | -0.000914 |
| 28               | 1                | 0              | -3.411820               | -0.263773 | -0.083406 |
| 29               | 1                | 0              | -4.835190               | -0.847220 | 0.099184  |
| 30               | 17               | 0              | 3.769021                | 0.618208  | 0.140038  |

-----  
Rotational constants (GHZ):      0.6955452      0.3651764      0.2497751

#### 4-methoxyphenol

Electronic Energy -574.815819

Stoichiometry C7H12O4

Framework group C1[X(C7H12O4)]  
 Deg. of freedom 63  
 Full point group C1 NOp 1  
 Largest Abelian subgroup C1 NOp 1  
 Largest concise Abelian subgroup C1 NOp 1  
 Standard orientation:

| Center<br>Number | Atomic<br>Number | Atomic<br>Type | Coordinates (Angstroms) |           |           |
|------------------|------------------|----------------|-------------------------|-----------|-----------|
|                  |                  |                | X                       | Y         | Z         |
| 1                | 6                | 0              | 1.979785                | 1.084762  | -0.581321 |
| 2                | 6                | 0              | 0.755870                | 1.723665  | -0.450266 |
| 3                | 6                | 0              | -0.362542               | 1.009375  | -0.030180 |
| 4                | 6                | 0              | -0.249658               | -0.348699 | 0.254825  |
| 5                | 6                | 0              | 0.978323                | -0.983970 | 0.122805  |
| 6                | 6                | 0              | 2.089625                | -0.268577 | -0.294927 |
| 7                | 1                | 0              | 2.853648                | 1.634403  | -0.910824 |
| 8                | 1                | 0              | 0.657067                | 2.778961  | -0.674804 |
| 9                | 1                | 0              | -1.120867               | -0.906728 | 0.576237  |
| 10               | 1                | 0              | 1.073327                | -2.041427 | 0.339938  |
| 11               | 8                | 0              | -1.546775               | 1.683439  | 0.080941  |
| 12               | 1                | 0              | -2.271362               | 1.096877  | 0.409425  |
| 13               | 8                | 0              | -3.611058               | 0.244743  | 1.027204  |
| 14               | 1                | 0              | -4.315388               | 0.855146  | 1.274779  |
| 15               | 1                | 0              | -4.015087               | -0.380096 | 0.386633  |
| 16               | 8                | 0              | -4.725277               | -1.505583 | -0.773318 |
| 17               | 1                | 0              | -4.082654               | -1.870917 | -1.393704 |
| 18               | 1                | 0              | -5.125714               | -2.273279 | -0.347246 |
| 19               | 8                | 0              | 3.307795                | -0.915996 | -0.463653 |
| 20               | 6                | 0              | 4.127457                | -0.913828 | 0.708370  |
| 21               | 1                | 0              | 5.043596                | -1.444956 | 0.454450  |
| 22               | 1                | 0              | 4.369089                | 0.109619  | 1.007790  |
| 23               | 1                | 0              | 3.623702                | -1.426796 | 1.532103  |

Rotational constants (GHZ): 1.8994457 0.3857899 0.3441344  
 Standard basis: 6-311+G(d,p) (5D, 7F)

#### 4-methoxyphenolate

Electronic Energy -574.349421  
 Stoichiometry C7H11O4(1-)  
 Framework group C1[X(C7H11O4)]  
 Deg. of freedom 60  
 Full point group C1 NOp 1  
 Largest Abelian subgroup C1 NOp 1  
 Largest concise Abelian subgroup C1 NOp 1  
 Standard orientation:

| Center<br>Number | Atomic<br>Number | Atomic<br>Type | Coordinates (Angstroms) |           |           |
|------------------|------------------|----------------|-------------------------|-----------|-----------|
|                  |                  |                | X                       | Y         | Z         |
| 1                | 6                | 0              | 1.295493                | -1.203381 | -0.028668 |
| 2                | 6                | 0              | -0.084971               | -1.193704 | 0.108703  |
| 3                | 6                | 0              | -0.830309               | -0.004713 | -0.030264 |
| 4                | 6                | 0              | -0.107581               | 1.171237  | -0.316021 |
| 5                | 6                | 0              | 1.274076                | 1.157921  | -0.448268 |
| 6                | 6                | 0              | 1.979024                | -0.028118 | -0.306829 |
| 7                | 1                | 0              | 1.849242                | -2.130111 | 0.077300  |
| 8                | 1                | 0              | -0.612809               | -2.116057 | 0.324363  |
| 9                | 1                | 0              | -0.652334               | 2.101126  | -0.435794 |
| 10               | 1                | 0              | 1.812041                | 2.073334  | -0.670113 |
| 11               | 8                | 0              | -2.146612               | 0.004724  | 0.099216  |
| 12               | 8                | 0              | -3.551325               | 2.225260  | 0.214473  |
| 13               | 1                | 0              | -3.797456               | 2.333445  | 1.138784  |
| 14               | 1                | 0              | -2.982963               | 1.402788  | 0.183457  |
| 15               | 8                | 0              | -3.586318               | -2.194661 | 0.020565  |
| 16               | 1                | 0              | -3.006299               | -1.379977 | 0.031858  |
| 17               | 1                | 0              | -3.881818               | -2.287247 | -0.890865 |
| 18               | 8                | 0              | 3.363301                | -0.042661 | -0.481941 |
| 19               | 6                | 0              | 4.098410                | 0.064912  | 0.737577  |
| 20               | 1                | 0              | 3.870502                | -0.771637 | 1.404060  |
| 21               | 1                | 0              | 5.155783                | 0.041631  | 0.476180  |
| 22               | 1                | 0              | 3.868904                | 1.006486  | 1.244881  |

Rotational constants (GHZ): 1.8043916 0.4620680 0.3803542

#### 4-hydroxybenzonitrile

Electronic Energy -552.540660

Stoichiometry C7H9NO3

Framework group C1[X(C7H9NO3)]

Deg. of freedom 54

Full point group C1 NOp 1

Largest Abelian subgroup C1 NOp 1

Largest concise Abelian subgroup C1 NOp 1

Standard orientation:

| Center<br>Number | Atomic<br>Number | Atomic<br>Type | Coordinates (Angstroms) |           |           |
|------------------|------------------|----------------|-------------------------|-----------|-----------|
|                  |                  |                | X                       | Y         | Z         |
| 1                | 6                | 0              | -2.144856               | 1.073756  | 0.457987  |
| 2                | 6                | 0              | -0.903539               | 1.674283  | 0.458246  |
| 3                | 6                | 0              | 0.213892                | 0.971693  | 0.001947  |
| 4                | 6                | 0              | 0.075777                | -0.340043 | -0.458334 |
| 5                | 6                | 0              | -1.167555               | -0.941210 | -0.458014 |
| 6                | 6                | 0              | -2.285868               | -0.240172 | -0.000178 |
| 7                | 1                | 0              | -3.011865               | 1.617118  | 0.811948  |
| 8                | 1                | 0              | -0.780294               | 2.690813  | 0.810181  |
| 9                | 1                | 0              | 0.944708                | -0.880415 | -0.811934 |
| 10               | 1                | 0              | -1.277100               | -1.958400 | -0.812466 |
| 11               | 8                | 0              | 1.405725                | 1.604842  | 0.027766  |
| 12               | 1                | 0              | 2.143287                | 1.037897  | -0.321628 |
| 13               | 8                | 0              | 3.468775                | 0.228121  | -0.928543 |
| 14               | 1                | 0              | 4.162600                | 0.850398  | -1.176687 |
| 15               | 1                | 0              | 3.882269                | -0.389406 | -0.285963 |
| 16               | 8                | 0              | 4.607469                | -1.495744 | 0.874725  |
| 17               | 1                | 0              | 3.970993                | -1.862170 | 1.500797  |
| 18               | 1                | 0              | 5.013038                | -2.262920 | 0.452563  |
| 19               | 6                | 0              | -3.566889               | -0.862048 | 0.001305  |
| 20               | 7                | 0              | -4.604165               | -1.365462 | 0.003407  |

Rotational constants (GHZ): 2.0054793 0.3916555 0.3469310

#### 4-cyanophenolate

Electronic Energy -552.079872

Stoichiometry C7H8NO3(1-)

Framework group C1[X(C7H8NO3)]

Deg. of freedom 51

Full point group C1 NOp 1

Largest Abelian subgroup C1 NOp 1

Largest concise Abelian subgroup C1 NOp 1

Standard orientation:

| Center<br>Number | Atomic<br>Number | Atomic<br>Type | Coordinates (Angstroms) |           |           |
|------------------|------------------|----------------|-------------------------|-----------|-----------|
|                  |                  |                | X                       | Y         | Z         |
| 1                | 6                | 0              | 1.443045                | 1.207033  | -0.075779 |
| 2                | 6                | 0              | 0.067449                | 1.209225  | -0.099650 |
| 3                | 6                | 0              | -0.674995               | 0.001337  | -0.045049 |
| 4                | 6                | 0              | 0.063361                | -1.207639 | 0.034858  |
| 5                | 6                | 0              | 1.438950                | -1.207484 | 0.057703  |
| 6                | 6                | 0              | 2.151882                | -0.000774 | 0.002955  |
| 7                | 1                | 0              | 1.987708                | 2.143000  | -0.118771 |
| 8                | 1                | 0              | -0.473943               | 2.145885  | -0.162034 |
| 9                | 1                | 0              | -0.481248               | -2.143512 | 0.078022  |
| 10               | 1                | 0              | 1.980406                | -2.144321 | 0.118527  |
| 11               | 8                | 0              | -1.975363               | 0.002309  | -0.068295 |
| 12               | 8                | 0              | -3.433498               | -2.222423 | 0.060192  |
| 13               | 1                | 0              | -4.015075               | -2.190927 | -0.706394 |
| 14               | 1                | 0              | -2.862814               | -1.411844 | -0.007751 |
| 15               | 8                | 0              | -3.434164               | 2.227576  | 0.036500  |
| 16               | 1                | 0              | -2.862039               | 1.415580  | 0.015865  |
| 17               | 1                | 0              | -3.958423               | 2.151131  | 0.840335  |
| 18               | 6                | 0              | 3.569560                | -0.002086 | 0.025866  |
| 19               | 7                | 0              | 4.724874                | -0.003195 | 0.044228  |

Rotational constants (GHZ):      1.9275122      0.4705500      0.3791892

#### 4-nitrophenol

Electronic Energy -664.816544

Stoichiometry C<sub>6</sub>H<sub>9</sub>NO<sub>5</sub>

Framework group C1[X(C<sub>6</sub>H<sub>9</sub>NO<sub>5</sub>)]

Deg. of freedom 57

Full point group C<sub>1</sub> NOp 1

Largest Abelian subgroup C<sub>1</sub> NOp 1

Largest concise Abelian subgroup C<sub>1</sub> NOp 1

Standard orientation:

| Center<br>Number | Atomic<br>Number | Atomic<br>Type | Coordinates (Angstroms) |           |           |
|------------------|------------------|----------------|-------------------------|-----------|-----------|
|                  |                  |                | X                       | Y         | Z         |
| 1                | 6                | 0              | -1.686175               | 1.329628  | -0.020169 |
| 2                | 6                | 0              | -0.356170               | 1.670889  | 0.073217  |
| 3                | 6                | 0              | 0.620776                | 0.672847  | 0.164219  |
| 4                | 6                | 0              | 0.247072                | -0.676525 | 0.160519  |
| 5                | 6                | 0              | -1.083939               | -1.020933 | 0.068136  |
| 6                | 6                | 0              | -2.041695               | -0.016512 | -0.022217 |
| 7                | 1                | 0              | -2.446467               | 2.094462  | -0.091458 |
| 8                | 1                | 0              | -0.050549               | 2.709172  | 0.077384  |
| 9                | 1                | 0              | 1.005685                | -1.445788 | 0.229452  |
| 10               | 1                | 0              | -1.381708               | -2.059814 | 0.064326  |
| 11               | 8                | 0              | 1.902412                | 1.060420  | 0.252303  |
| 12               | 1                | 0              | 2.530902                | 0.288452  | 0.311243  |
| 13               | 8                | 0              | 3.664201                | -0.896115 | 0.451611  |
| 14               | 1                | 0              | 3.382793                | -1.693567 | -0.012436 |
| 15               | 1                | 0              | 4.538474                | -0.656580 | 0.071318  |
| 16               | 8                | 0              | 6.099436                | -0.191015 | -0.584685 |
| 17               | 1                | 0              | 6.194069                | 0.765903  | -0.666932 |
| 18               | 1                | 0              | 6.831939                | -0.467704 | -0.020526 |
| 19               | 7                | 0              | -3.434979               | -0.378478 | -0.121809 |
| 20               | 8                | 0              | -4.272078               | 0.512266  | -0.209634 |
| 21               | 8                | 0              | -3.738908               | -1.565751 | -0.116087 |

Rotational constants (GHZ):      2.6655742      0.2812469      0.2575819

#### 4-nitrophenolate

Electronic Energy -664.359307

Stoichiometry C<sub>6</sub>H<sub>8</sub>NO<sub>5</sub>(1-)

Framework group C1[X(C<sub>6</sub>H<sub>8</sub>NO<sub>5</sub>)]

Deg. of freedom 54

Full point group C<sub>1</sub> NOp 1

Largest Abelian subgroup C<sub>1</sub> NOp 1

Largest concise Abelian subgroup C<sub>1</sub> NOp 1

Standard orientation:

| Center<br>Number | Atomic<br>Number | Atomic<br>Type | Coordinates (Angstroms) |           |           |
|------------------|------------------|----------------|-------------------------|-----------|-----------|
|                  |                  |                | X                       | Y         | Z         |
| 1                | 6                | 0              | 1.034805                | 1.216112  | -0.051315 |
| 2                | 6                | 0              | -0.333265               | 1.216570  | -0.051873 |
| 3                | 6                | 0              | -1.077238               | -0.000001 | -0.000747 |
| 4                | 6                | 0              | -0.333305               | -1.216582 | 0.050721  |
| 5                | 6                | 0              | 1.034765                | -1.216140 | 0.050820  |
| 6                | 6                | 0              | 1.732020                | -0.000019 | -0.000077 |
| 7                | 1                | 0              | 1.583246                | 2.147252  | -0.090802 |
| 8                | 1                | 0              | -0.879760               | 2.150865  | -0.091976 |
| 9                | 1                | 0              | -0.879832               | -2.150870 | 0.090554  |
| 10               | 1                | 0              | 1.583175                | -2.147287 | 0.090556  |
| 11               | 8                | 0              | -2.362682               | 0.000013  | -0.001047 |
| 12               | 8                | 0              | -3.848863               | -2.240742 | 0.013147  |
| 13               | 1                | 0              | -4.401111               | -2.186819 | -0.773692 |
| 14               | 1                | 0              | -3.275326               | -1.435400 | -0.013281 |
| 15               | 8                | 0              | -3.848689               | 2.240908  | -0.011546 |
| 16               | 1                | 0              | -3.275332               | 1.435400  | 0.013613  |
| 17               | 1                | 0              | -4.400184               | 2.186427  | 0.775780  |
| 18               | 7                | 0              | 3.145358                | -0.000027 | 0.000275  |
| 19               | 8                | 0              | 3.753941                | 1.075668  | -0.040649 |
| 20               | 8                | 0              | 3.753909                | -1.075725 | 0.041612  |

-----  
 Rotational constants (GHZ):      1.6706719      0.3892465      0.3162489

#### 4-nitrothymol

Electronic Energy -822.012637

Stoichiometry C10H17NO5

Framework group C1[X(C10H17NO5)]

Deg. of freedom 93

Full point group C1 NOp 1

Largest Abelian subgroup C1 NOp 1

Largest concise Abelian subgroup C1 NOp 1

Standard orientation:

| Center<br>Number | Atomic<br>Number | Atomic<br>Type | Coordinates (Angstroms) |           |           |
|------------------|------------------|----------------|-------------------------|-----------|-----------|
|                  |                  |                | X                       | Y         | Z         |
| 1                | 6                | 0              | -1.218002               | 0.958446  | -0.067063 |
| 2                | 6                | 0              | 0.133892                | 1.008263  | -0.322872 |
| 3                | 6                | 0              | 0.799634                | -0.225446 | -0.455180 |
| 4                | 6                | 0              | 0.115006                | -1.431385 | -0.327555 |
| 5                | 6                | 0              | -1.249169               | -1.491375 | -0.080801 |
| 6                | 6                | 0              | -1.900625               | -0.255302 | 0.045296  |
| 7                | 1                | 0              | -1.784040               | 1.872162  | 0.037220  |
| 8                | 1                | 0              | 0.671790                | -2.355754 | -0.423149 |
| 9                | 8                | 0              | 2.119293                | -0.199809 | -0.712388 |
| 10               | 1                | 0              | 2.517688                | -1.105175 | -0.741720 |
| 11               | 8                | 0              | 3.551471                | -2.461816 | -0.536261 |
| 12               | 1                | 0              | 4.115526                | -2.646412 | -1.296327 |
| 13               | 1                | 0              | 4.112570                | -1.976565 | 0.103388  |
| 14               | 8                | 0              | 4.640413                | -0.635780 | 1.208611  |
| 15               | 1                | 0              | 3.875870                | -0.057677 | 1.081857  |
| 16               | 1                | 0              | 4.669654                | -0.813768 | 2.156259  |
| 17               | 7                | 0              | -3.318273               | -0.170963 | 0.303353  |
| 18               | 8                | 0              | -3.779793               | 0.883630  | 0.733046  |
| 19               | 8                | 0              | -4.027972               | -1.145032 | 0.083122  |
| 20               | 6                | 0              | 0.908888                | 2.305758  | -0.432648 |
| 21               | 1                | 0              | 1.649359                | 2.165545  | -1.224508 |
| 22               | 6                | 0              | 1.668975                | 2.587376  | 0.869853  |
| 23               | 1                | 0              | 2.325964                | 1.759223  | 1.143914  |
| 24               | 1                | 0              | 2.283074                | 3.485230  | 0.764662  |
| 25               | 1                | 0              | 0.967196                | 2.751705  | 1.692354  |
| 26               | 6                | 0              | 0.042814                | 3.503381  | -0.812514 |
| 27               | 1                | 0              | -0.526529               | 3.317813  | -1.726285 |
| 28               | 1                | 0              | -0.661563               | 3.762815  | -0.018014 |
| 29               | 1                | 0              | 0.678163                | 4.375353  | -0.982166 |
| 30               | 6                | 0              | -1.890387               | -2.842034 | 0.056036  |
| 31               | 1                | 0              | -2.499121               | -2.910992 | 0.958250  |
| 32               | 1                | 0              | -2.546044               | -3.055794 | -0.789279 |
| 33               | 1                | 0              | -1.115093               | -3.606619 | 0.095720  |

-----  
 Rotational constants (GHZ):      0.6177707      0.3091843      0.2224958

#### 4-nitrothymolate

Electronic Energy -821.555067

Stoichiometry C10H16NO5(1-)

Framework group C1[X(C10H16NO5)]

Deg. of freedom 90

Full point group C1 NOp 1

Largest Abelian subgroup C1 NOp 1

Largest concise Abelian subgroup C1 NOp 1

Standard orientation:

| Center<br>Number | Atomic<br>Number | Atomic<br>Type | Coordinates (Angstroms) |           |           |
|------------------|------------------|----------------|-------------------------|-----------|-----------|
|                  |                  |                | X                       | Y         | Z         |
| 1                | 6                | 0              | -0.956370               | 1.036747  | -0.067584 |
| 2                | 6                | 0              | 0.388969                | 0.801333  | -0.098718 |
| 3                | 6                | 0              | 0.838399                | -0.564586 | -0.086580 |
| 4                | 6                | 0              | -0.146730               | -1.587980 | -0.039747 |
| 5                | 6                | 0              | -1.503028               | -1.357808 | -0.004032 |
| 6                | 6                | 0              | -1.912378               | 0.000499  | -0.018380 |
| 7                | 1                | 0              | -1.323470               | 2.052095  | -0.081537 |



|    |   |   |           |           |           |
|----|---|---|-----------|-----------|-----------|
| 8  | 1 | 0 | 0.210475  | -2.611721 | -0.034701 |
| 9  | 8 | 0 | 2.086084  | -0.866607 | -0.122533 |
| 10 | 8 | 0 | 3.029545  | -3.367321 | 0.074227  |
| 11 | 1 | 0 | 2.293932  | -3.984884 | 0.004138  |
| 12 | 1 | 0 | 2.619502  | -2.469064 | -0.000876 |
| 13 | 8 | 0 | 4.579299  | 0.170081  | -0.309701 |
| 14 | 1 | 0 | 3.638535  | -0.110511 | -0.242184 |
| 15 | 1 | 0 | 5.074831  | -0.651234 | -0.397509 |
| 16 | 7 | 0 | -3.269169 | 0.385314  | 0.009773  |
| 17 | 8 | 0 | -3.565235 | 1.591991  | -0.015997 |
| 18 | 8 | 0 | -4.160755 | -0.471575 | 0.061018  |
| 19 | 6 | 0 | 1.416142  | 1.913358  | -0.117818 |
| 20 | 1 | 0 | 2.225678  | 1.580137  | -0.772926 |
| 21 | 6 | 0 | 2.010147  | 2.122273  | 1.281199  |
| 22 | 1 | 0 | 2.406546  | 1.193379  | 1.694605  |
| 23 | 1 | 0 | 2.822914  | 2.852692  | 1.249471  |
| 24 | 1 | 0 | 1.244135  | 2.498872  | 1.965473  |
| 25 | 6 | 0 | 0.887886  | 3.234615  | -0.670102 |
| 26 | 1 | 0 | 0.450455  | 3.111974  | -1.663872 |
| 27 | 1 | 0 | 0.128846  | 3.673610  | -0.017084 |
| 28 | 1 | 0 | 1.705462  | 3.955080  | -0.748251 |
| 29 | 6 | 0 | -2.421865 | -2.545429 | 0.041734  |
| 30 | 1 | 0 | -3.043197 | -2.537673 | 0.938223  |
| 31 | 1 | 0 | -3.100586 | -2.560987 | -0.811985 |
| 32 | 1 | 0 | -1.828405 | -3.459647 | 0.034651  |

-----

Rotational constants (GHZ):        0.6518717        0.3224676        0.2236825

-    **2H<sub>2</sub>O/CAM-B3LYP 6-311G+dp/PCM**

**H<sub>2</sub>O**

Electronic Energy -229.329930

Stoichiometry    H6O3

Framework group    C1[X(H6O3)]

Deg. of freedom    21

Full point group                C1    NOp   1

Largest Abelian subgroup        C1    NOp   1

Largest concise Abelian subgroup C1    NOp   1

Standard orientation:

| Center<br>Number | Atomic<br>Number | Atomic<br>Type | Coordinates (Angstroms) |           |           |
|------------------|------------------|----------------|-------------------------|-----------|-----------|
|                  |                  |                | X                       | Y         | Z         |
| 1                | 8                | 0              | 0.000027                | 0.771636  | -0.000040 |
| 2                | 1                | 0              | 0.000772                | 1.353128  | 0.768172  |
| 3                | 1                | 0              | -0.001205               | 1.353830  | -0.767718 |
| 4                | 8                | 0              | -2.657232               | -0.369073 | -0.000223 |
| 5                | 1                | 0              | -2.720716               | -1.326416 | 0.001483  |
| 6                | 1                | 0              | -1.713112               | -0.161121 | 0.000730  |
| 7                | 8                | 0              | 2.657268                | -0.369069 | 0.000209  |
| 8                | 1                | 0              | 2.720574                | -1.326425 | -0.001593 |
| 9                | 1                | 0              | 1.713184                | -0.160946 | -0.000632 |

-----

Rotational constants (GHZ):        22.6022816        2.0386116        1.8865469

**OH<sup>-</sup>**

Electronic Energy -152.393647

Stoichiometry    H3O2(1-)

Framework group    C1[X(H3O2)]

Deg. of freedom    9

Full point group                C1    NOp   1

Largest Abelian subgroup        C1    NOp   1

Largest concise Abelian subgroup C1    NOp   1

Standard orientation:

| Center<br>Number | Atomic<br>Number | Atomic<br>Type | Coordinates (Angstroms) |           |           |
|------------------|------------------|----------------|-------------------------|-----------|-----------|
|                  |                  |                | X                       | Y         | Z         |
| 1                | 8                | 0              | 1.225669                | 0.098967  | -0.058420 |
| 2                | 1                | 0              | 1.577600                | -0.615783 | 0.477436  |

|   |   |   |           |           |           |
|---|---|---|-----------|-----------|-----------|
| 3 | 8 | 0 | -1.224967 | -0.103198 | -0.046754 |
| 4 | 1 | 0 | -1.479939 | 0.685116  | 0.436534  |
| 5 | 1 | 0 | -0.103272 | -0.035486 | -0.072574 |

Rotational constants (GHZ): 314.8359149 9.4768812 9.3693157

### Phenol

Electronic Energy -460.298191

Stoichiometry C<sub>6</sub>H<sub>10</sub>O<sub>3</sub>

Framework group C1[X(C<sub>6</sub>H<sub>10</sub>O<sub>3</sub>)]

Deg. of freedom 51

Full point group C1 NOp 1

Largest Abelian subgroup C1 NOp 1

Largest concise Abelian subgroup C1 NOp 1

Standard orientation:

| Center<br>Number | Atomic<br>Number | Atomic<br>Type | Coordinates (Angstroms) |           |           |
|------------------|------------------|----------------|-------------------------|-----------|-----------|
|                  |                  |                | X                       | Y         | Z         |
| 1                | 6                | 0              | 2.579260                | -1.016676 | -0.040705 |
| 2                | 6                | 0              | 1.253485                | -1.237462 | -0.379970 |
| 3                | 6                | 0              | 0.346478                | -0.185920 | -0.328551 |
| 4                | 6                | 0              | 0.765128                | 1.081408  | 0.061626  |
| 5                | 6                | 0              | 2.096200                | 1.289930  | 0.395107  |
| 6                | 6                | 0              | 3.009913                | 0.246168  | 0.347385  |
| 7                | 1                | 0              | 3.283009                | -1.839665 | -0.083224 |
| 8                | 1                | 0              | 0.907538                | -2.215265 | -0.691722 |
| 9                | 1                | 0              | 0.046779                | 1.892161  | 0.109070  |
| 10               | 1                | 0              | 2.417832                | 2.279297  | 0.698418  |
| 11               | 1                | 0              | 4.046814                | 0.414137  | 0.609927  |
| 12               | 8                | 0              | -0.950101               | -0.442795 | -0.665179 |
| 13               | 1                | 0              | -1.485870               | 0.376792  | -0.670092 |
| 14               | 8                | 0              | -2.896718               | 1.394032  | -0.243515 |
| 15               | 1                | 0              | -3.524160               | 1.828118  | -0.825832 |
| 16               | 1                | 0              | -3.367944               | 0.667279  | 0.203110  |
| 17               | 8                | 0              | -3.222605               | -1.107456 | 0.798023  |
| 18               | 1                | 0              | -2.363787               | -1.283333 | 0.378914  |
| 19               | 1                | 0              | -3.707608               | -1.934460 | 0.827446  |

Rotational constants (GHZ): 2.8958025 0.7313665 0.6242864

### Phenolate

Electronic Energy -459.831866

Stoichiometry C<sub>6</sub>H<sub>9</sub>O<sub>3</sub>(1-)

Framework group C1[X(C<sub>6</sub>H<sub>9</sub>O<sub>3</sub>)]

Deg. of freedom 48

Full point group C1 NOp 1

Largest Abelian subgroup C1 NOp 1

Largest concise Abelian subgroup C1 NOp 1

Standard orientation:

| Center<br>Number | Atomic<br>Number | Atomic<br>Type | Coordinates (Angstroms) |           |           |
|------------------|------------------|----------------|-------------------------|-----------|-----------|
|                  |                  |                | X                       | Y         | Z         |
| 1                | 6                | 0              | 2.239783                | -1.191366 | 0.089534  |
| 2                | 6                | 0              | 0.855874                | -1.200725 | 0.090661  |
| 3                | 6                | 0              | 0.103276                | -0.000014 | 0.000051  |
| 4                | 6                | 0              | 0.855928                | 1.200660  | -0.090622 |
| 5                | 6                | 0              | 2.239837                | 1.191230  | -0.089575 |
| 6                | 6                | 0              | 2.957691                | -0.000086 | -0.000040 |
| 7                | 1                | 0              | 2.773761                | -2.135488 | 0.160346  |
| 8                | 1                | 0              | 0.307361                | -2.134174 | 0.159615  |
| 9                | 1                | 0              | 0.307455                | 2.134133  | -0.159578 |
| 10               | 1                | 0              | 2.773857                | 2.135324  | -0.160435 |
| 11               | 1                | 0              | 4.041828                | -0.000113 | -0.000074 |
| 12               | 8                | 0              | -1.191149               | 0.000017  | 0.000105  |
| 13               | 8                | 0              | -2.824764               | 2.092553  | 0.032464  |
| 14               | 1                | 0              | -3.337591               | 1.846389  | 0.804705  |
| 15               | 1                | 0              | -2.156604               | 1.355543  | -0.039445 |
| 16               | 8                | 0              | -2.825152               | -2.092399 | -0.032578 |
| 17               | 1                | 0              | -2.156952               | -1.355406 | 0.038921  |
| 18               | 1                | 0              | -3.338927               | -1.845773 | -0.804040 |

Rotational constants (GHZ): 2.1100979 0.8611089 0.6142565

### Thymol

Electronic Energy -617.499633

Stoichiometry C10H18O3

Framework group C1[X(C10H18O3)]

Deg. of freedom 87

Full point group C1 NOp 1

Largest Abelian subgroup C1 NOp 1

Largest concise Abelian subgroup C1 NOp 1

Standard orientation:

| Center<br>Number | Atomic<br>Number | Atomic<br>Type | Coordinates (Angstroms) |           |           |
|------------------|------------------|----------------|-------------------------|-----------|-----------|
|                  |                  |                | X                       | Y         | Z         |
| 1                | 6                | 0              | -0.158235               | 2.186971  | -0.296881 |
| 2                | 1                | 0              | -0.954110               | 1.966721  | -1.013079 |
| 3                | 6                | 0              | 0.659901                | 0.918621  | -0.151881 |
| 4                | 6                | 0              | 2.022711                | 0.916996  | 0.116129  |
| 5                | 6                | 0              | 0.035212                | -0.329051 | -0.256104 |
| 6                | 6                | 0              | 2.743388                | -0.261066 | 0.272971  |
| 7                | 1                | 0              | 2.546027                | 1.861523  | 0.201744  |
| 8                | 6                | 0              | 0.746618                | -1.510650 | -0.102352 |
| 9                | 6                | 0              | 2.112986                | -1.493599 | 0.161881  |
| 10               | 1                | 0              | 3.806330                | -0.216292 | 0.481160  |
| 11               | 1                | 0              | 0.218718                | -2.455973 | -0.185447 |
| 12               | 6                | 0              | 0.638913                | 3.371957  | -0.840523 |
| 13               | 1                | 0              | -0.028266               | 4.215831  | -1.030955 |
| 14               | 1                | 0              | 1.396041                | 3.713844  | -0.130238 |
| 15               | 1                | 0              | 1.141948                | 3.120420  | -1.776404 |
| 16               | 6                | 0              | -0.824424               | 2.555201  | 1.035730  |
| 17               | 1                | 0              | -1.485725               | 3.417699  | 0.917184  |
| 18               | 1                | 0              | -1.413819               | 1.724340  | 1.428764  |
| 19               | 1                | 0              | -0.069398               | 2.806814  | 1.785497  |
| 20               | 6                | 0              | 2.877844                | -2.782596 | 0.301248  |
| 21               | 1                | 0              | 2.335678                | -3.501958 | 0.918543  |
| 22               | 1                | 0              | 3.042434                | -3.247875 | -0.674687 |
| 23               | 1                | 0              | 3.854635                | -2.614253 | 0.756614  |
| 24               | 8                | 0              | -1.307457               | -0.353020 | -0.514643 |
| 25               | 1                | 0              | -1.628633               | -1.267484 | -0.650891 |
| 26               | 8                | 0              | -3.855804               | -0.307367 | 0.617610  |
| 27               | 1                | 0              | -2.982706               | 0.057343  | 0.395515  |
| 28               | 1                | 0              | -4.086027               | 0.019953  | 1.490038  |
| 29               | 8                | 0              | -2.840471               | -2.590422 | -0.492679 |
| 30               | 1                | 0              | -3.317975               | -3.019810 | -1.206359 |
| 31               | 1                | 0              | -3.474773               | -2.011088 | -0.030611 |

Rotational constants (GHZ): 0.6896704 0.5733312 0.3373845

### Thymolate

Electronic Energy -617.037656

Stoichiometry C10H17O3(1-)

Framework group C1[X(C10H17O3)]

Deg. of freedom 84

Full point group C1 NOp 1

Largest Abelian subgroup C1 NOp 1

Largest concise Abelian subgroup C1 NOp 1

Standard orientation:

| Center<br>Number | Atomic<br>Number | Atomic<br>Type | Coordinates (Angstroms) |           |           |
|------------------|------------------|----------------|-------------------------|-----------|-----------|
|                  |                  |                | X                       | Y         | Z         |
| 1                | 6                | 0              | -1.509154               | -1.429087 | -0.162357 |
| 2                | 1                | 0              | -2.062035               | -0.684207 | -0.741028 |
| 3                | 6                | 0              | -0.068396               | -0.958252 | -0.100830 |
| 4                | 6                | 0              | 1.003470                | -1.840502 | -0.138587 |
| 5                | 6                | 0              | 0.204367                | 0.432195  | 0.034743  |
| 6                | 6                | 0              | 2.328943                | -1.417316 | -0.049766 |
| 7                | 1                | 0              | 0.808856                | -2.902389 | -0.240386 |
| 8                | 6                | 0              | 1.550460                | 0.837524  | 0.119323  |
| 9                | 6                | 0              | 2.612351                | -0.060731 | 0.077829  |

|    |   |   |           |           |           |
|----|---|---|-----------|-----------|-----------|
| 10 | 1 | 0 | 3.134860  | -2.142432 | -0.081762 |
| 11 | 1 | 0 | 1.751585  | 1.899791  | 0.224055  |
| 12 | 6 | 0 | -2.129570 | -1.472300 | 1.240286  |
| 13 | 1 | 0 | -3.196248 | -1.709020 | 1.188929  |
| 14 | 1 | 0 | -1.642970 | -2.242627 | 1.846520  |
| 15 | 1 | 0 | -2.020540 | -0.517521 | 1.757746  |
| 16 | 6 | 0 | -1.698036 | -2.775886 | -0.858027 |
| 17 | 1 | 0 | -2.764024 | -2.997531 | -0.954282 |
| 18 | 1 | 0 | -1.262699 | -2.778586 | -1.860479 |
| 19 | 1 | 0 | -1.246090 | -3.594428 | -0.291723 |
| 20 | 6 | 0 | 4.033448  | 0.434346  | 0.144720  |
| 21 | 1 | 0 | 4.351191  | 0.847871  | -0.817201 |
| 22 | 1 | 0 | 4.145518  | 1.226100  | 0.888727  |
| 23 | 1 | 0 | 4.721799  | -0.373691 | 0.398771  |
| 24 | 8 | 0 | -0.763856 | 1.330041  | 0.081953  |
| 25 | 8 | 0 | -0.382076 | 3.907055  | -0.229604 |
| 26 | 1 | 0 | 0.032666  | 4.047945  | -1.086903 |
| 27 | 1 | 0 | -0.461632 | 2.913423  | -0.129809 |
| 28 | 8 | 0 | -3.399098 | 1.582521  | -0.084703 |
| 29 | 1 | 0 | -2.425100 | 1.397558  | -0.024046 |
| 30 | 1 | 0 | -3.472198 | 2.552860  | -0.062300 |

---

Rotational constants (GHZ):      0.7435371      0.5832709      0.3473228

### Carvacrol

Electronic Energy -617.500163

Stoichiometry C10H18O3

Framework group C1[X(C10H18O3)]

Deg. of freedom 87

Full point group C1 NOp 1

Largest Abelian subgroup C1 NOp 1

Largest concise Abelian subgroup C1 NOp 1

Standard orientation:

---

| Center<br>Number | Atomic<br>Number | Atomic<br>Type | Coordinates (Angstroms) |           |           |
|------------------|------------------|----------------|-------------------------|-----------|-----------|
|                  |                  |                | X                       | Y         | Z         |
| 1                | 6                | 0              | -0.592706               | 1.517328  | 0.025200  |
| 2                | 6                | 0              | -0.663353               | 0.146195  | -0.225444 |
| 3                | 6                | 0              | 0.483202                | -0.640551 | -0.254854 |
| 4                | 6                | 0              | 1.739752                | -0.091511 | -0.031609 |
| 5                | 6                | 0              | 1.820967                | 1.277349  | 0.224687  |
| 6                | 6                | 0              | 0.672927                | 2.055094  | 0.250246  |
| 7                | 1                | 0              | 2.781978                | 1.744387  | 0.405354  |
| 8                | 8                | 0              | -1.849404               | -0.487241 | -0.469724 |
| 9                | 1                | 0              | -2.639655               | 0.067380  | -0.313123 |
| 10               | 8                | 0              | -3.585143               | -2.533214 | 0.320034  |
| 11               | 1                | 0              | -3.749081               | -3.306691 | -0.228103 |
| 12               | 1                | 0              | -2.749300               | -2.147902 | 0.008812  |
| 13               | 8                | 0              | -4.436575               | 0.084092  | 0.116617  |
| 14               | 1                | 0              | -4.484734               | -0.888665 | 0.173723  |
| 15               | 1                | 0              | -5.127580               | 0.360158  | -0.493146 |
| 16               | 1                | 0              | 0.754893                | 3.118524  | 0.448742  |
| 17               | 1                | 0              | 0.374164                | -1.700767 | -0.455983 |
| 18               | 6                | 0              | -1.828893               | 2.374453  | 0.041192  |
| 19               | 1                | 0              | -2.337360               | 2.366125  | -0.927655 |
| 20               | 1                | 0              | -2.553042               | 2.035640  | 0.786664  |
| 21               | 1                | 0              | -1.572803               | 3.408362  | 0.271316  |
| 22               | 6                | 0              | 2.977020                | -0.968259 | -0.067330 |
| 23               | 1                | 0              | 2.640558                | -1.986556 | -0.284379 |
| 24               | 6                | 0              | 3.937488                | -0.548809 | -1.184724 |
| 25               | 1                | 0              | 4.790634                | -1.230139 | -1.231143 |
| 26               | 1                | 0              | 3.441247                | -0.558554 | -2.157585 |
| 27               | 1                | 0              | 4.324546                | 0.459027  | -1.013946 |
| 28               | 6                | 0              | 3.693097                | -0.994970 | 1.286720  |
| 29               | 1                | 0              | 3.021730                | -1.323419 | 2.083077  |
| 30               | 1                | 0              | 4.544358                | -1.679489 | 1.255390  |
| 31               | 1                | 0              | 4.071406                | -0.004434 | 1.552064  |

---

Rotational constants (GHZ):      1.1705685      0.3522548      0.2904456

**Carvacrolate**

Electronic Energy -617.031742

Stoichiometry C<sub>10</sub>H<sub>17</sub>O<sub>3</sub>(1-)Framework group C1[X(C<sub>10</sub>H<sub>17</sub>O<sub>3</sub>)]

Deg. of freedom 84

Full point group C<sub>1</sub> NOp 1Largest Abelian subgroup C<sub>1</sub> NOp 1Largest concise Abelian subgroup C<sub>1</sub> NOp 1

Standard orientation:

| Center<br>Number | Atomic<br>Number | Atomic<br>Type | Coordinates (Angstroms) |           |           |
|------------------|------------------|----------------|-------------------------|-----------|-----------|
|                  |                  |                | X                       | Y         | Z         |
| 1                | 6                | 0              | -0.724978               | 1.583626  | -0.104295 |
| 2                | 6                | 0              | -0.842648               | 0.185508  | -0.319697 |
| 3                | 6                | 0              | 0.341011                | -0.583415 | -0.269269 |
| 4                | 6                | 0              | 1.592109                | -0.031647 | -0.018486 |
| 5                | 6                | 0              | 1.683575                | 1.344646  | 0.192133  |
| 6                | 6                | 0              | 0.530195                | 2.123397  | 0.144739  |
| 7                | 1                | 0              | 2.641007                | 1.812981  | 0.390113  |
| 8                | 8                | 0              | -2.004989               | -0.369451 | -0.566245 |
| 9                | 8                | 0              | -4.269226               | -0.373224 | 0.774481  |
| 10               | 1                | 0              | -4.902699               | 0.250877  | 0.410960  |
| 11               | 1                | 0              | -3.419508               | -0.225472 | 0.275979  |
| 12               | 8                | 0              | -2.814719               | -2.867462 | -0.219986 |
| 13               | 1                | 0              | -2.374029               | -1.995064 | -0.403057 |
| 14               | 1                | 0              | -3.634795               | -2.592791 | 0.205486  |
| 15               | 1                | 0              | 0.250916                | -1.653091 | -0.438035 |
| 16               | 1                | 0              | 0.610774                | 3.195064  | 0.306719  |
| 17               | 6                | 0              | -1.954791               | 2.446242  | -0.158728 |
| 18               | 1                | 0              | -2.462521               | 2.356993  | -1.123754 |
| 19               | 1                | 0              | -2.685336               | 2.157201  | 0.602236  |
| 20               | 1                | 0              | -1.702050               | 3.496869  | -0.002895 |
| 21               | 6                | 0              | 2.823097                | -0.920397 | 0.020866  |
| 22               | 1                | 0              | 2.483880                | -1.943309 | -0.171167 |
| 23               | 6                | 0              | 3.495369                | -0.907643 | 1.397482  |
| 24               | 1                | 0              | 2.793991                | -1.199693 | 2.182371  |
| 25               | 1                | 0              | 4.339918                | -1.601600 | 1.420984  |
| 26               | 1                | 0              | 3.875109                | 0.088256  | 1.640051  |
| 27               | 6                | 0              | 3.829096                | -0.554177 | -1.075134 |
| 28               | 1                | 0              | 4.675762                | -1.245918 | -1.068825 |
| 29               | 1                | 0              | 3.367041                | -0.592125 | -2.064263 |
| 30               | 1                | 0              | 4.221816                | 0.455071  | -0.926579 |

|                             |           |           |           |
|-----------------------------|-----------|-----------|-----------|
| Rotational constants (GHZ): | 1.0622442 | 0.3937437 | 0.3138211 |
|-----------------------------|-----------|-----------|-----------|

**2,3-dimethylphenol**

Electronic Energy -538.900010

Stoichiometry C<sub>8</sub>H<sub>14</sub>O<sub>3</sub>Framework group C1[X(C<sub>8</sub>H<sub>14</sub>O<sub>3</sub>)]

Deg. of freedom 69

Full point group C<sub>1</sub> NOp 1Largest Abelian subgroup C<sub>1</sub> NOp 1Largest concise Abelian subgroup C<sub>1</sub> NOp 1

Standard orientation:

| Center<br>Number | Atomic<br>Number | Atomic<br>Type | Coordinates (Angstroms) |           |           |
|------------------|------------------|----------------|-------------------------|-----------|-----------|
|                  |                  |                | X                       | Y         | Z         |
| 1                | 6                | 0              | -0.827063               | 0.559985  | 0.092173  |
| 2                | 6                | 0              | 0.024940                | -0.540189 | 0.230755  |
| 3                | 6                | 0              | -0.452761               | -1.844044 | 0.188185  |
| 4                | 6                | 0              | -1.805899               | -2.064316 | -0.001198 |
| 5                | 6                | 0              | -2.670023               | -0.987901 | -0.146518 |
| 6                | 6                | 0              | -2.196234               | 0.322255  | -0.101606 |
| 7                | 1                | 0              | -2.187827               | -3.077742 | -0.036964 |
| 8                | 1                | 0              | -3.728992               | -1.163073 | -0.296228 |
| 9                | 8                | 0              | 1.367982                | -0.389265 | 0.434905  |
| 10               | 1                | 0              | 1.696368                | 0.523809  | 0.317619  |
| 11               | 8                | 0              | 3.923424                | -1.062831 | -0.478340 |
| 12               | 1                | 0              | 4.506404                | -1.644385 | 0.019102  |
| 13               | 1                | 0              | 3.024684                | -1.224627 | -0.146315 |

|    |   |   |           |           |           |
|----|---|---|-----------|-----------|-----------|
| 14 | 8 | 0 | 3.173583  | 1.568015  | -0.101308 |
| 15 | 1 | 0 | 3.756907  | 0.795436  | -0.220867 |
| 16 | 1 | 0 | 3.614010  | 2.153859  | 0.521755  |
| 17 | 1 | 0 | 0.245100  | -2.664516 | 0.302845  |
| 18 | 6 | 0 | -0.249504 | 1.949383  | 0.167409  |
| 19 | 1 | 0 | 0.198894  | 2.138848  | 1.147760  |
| 20 | 1 | 0 | 0.535314  | 2.101701  | -0.578249 |
| 21 | 1 | 0 | -1.006198 | 2.711944  | 0.003407  |
| 22 | 6 | 0 | -3.171221 | 1.461821  | -0.258519 |
| 23 | 1 | 0 | -3.175455 | 2.113796  | 0.618349  |
| 24 | 1 | 0 | -2.929292 | 2.084744  | -1.123099 |
| 25 | 1 | 0 | -4.183231 | 1.080889  | -0.395260 |

Rotational constants (GHZ): 1.6252953 0.5727865 0.4334124

### 2,3-dimethylphenolate

Electronic Energy -538.431915

Stoichiometry C<sub>8</sub>H<sub>13</sub>O<sub>3</sub>(1-)

Framework group C1[X(C<sub>8</sub>H<sub>13</sub>O<sub>3</sub>)]

Deg. of freedom 66

Full point group C1 NOp 1

Largest Abelian subgroup C1 NOp 1

Largest concise Abelian subgroup C1 NOp 1

Standard orientation:

| Center<br>Number | Atomic<br>Number | Atomic<br>Type | Coordinates (Angstroms) |           |           |
|------------------|------------------|----------------|-------------------------|-----------|-----------|
|                  |                  |                | X                       | Y         | Z         |
| 1                | 6                | 0              | -0.116716               | 1.735461  | 0.136368  |
| 2                | 6                | 0              | 0.216018                | 0.372146  | 0.291149  |
| 3                | 6                | 0              | -0.832424               | -0.583910 | 0.184864  |
| 4                | 6                | 0              | -2.139334               | -0.170066 | -0.090074 |
| 5                | 6                | 0              | -2.429943               | 1.188041  | -0.247361 |
| 6                | 6                | 0              | -1.416423               | 2.131414  | -0.129218 |
| 7                | 1                | 0              | 0.677728                | 2.469257  | 0.225104  |
| 8                | 1                | 0              | -3.446360               | 1.498877  | -0.461963 |
| 9                | 8                | 0              | 1.451048                | 0.000835  | 0.529306  |
| 10               | 8                | 0              | 3.660742                | 1.197529  | -0.196068 |
| 11               | 1                | 0              | 4.040780                | 1.698905  | 0.529984  |
| 12               | 1                | 0              | 2.774613                | 0.863295  | 0.128850  |
| 13               | 8                | 0              | 3.136808                | -1.763352 | -0.523683 |
| 14               | 1                | 0              | 2.378617                | -1.257257 | -0.137356 |
| 15               | 1                | 0              | 3.802092                | -1.071614 | -0.620909 |
| 16               | 1                | 0              | -1.643227               | 3.186206  | -0.248644 |
| 17               | 6                | 0              | -0.487720               | -2.039109 | 0.362078  |
| 18               | 1                | 0              | -0.192911               | -2.506398 | -0.584865 |
| 19               | 1                | 0              | 0.357083                | -2.146553 | 1.042939  |
| 20               | 1                | 0              | -1.325907               | -2.614367 | 0.756760  |
| 21               | 6                | 0              | -3.254343               | -1.178339 | -0.227480 |
| 22               | 1                | 0              | -3.030360               | -1.927843 | -0.991090 |
| 23               | 1                | 0              | -3.427964               | -1.720322 | 0.706586  |
| 24               | 1                | 0              | -4.187652               | -0.686108 | -0.503796 |

Rotational constants (GHZ): 1.5704121 0.6208995 0.4604893

### 2,4-dimethylphenol

Electronic Energy -538.901268

Stoichiometry C<sub>8</sub>H<sub>14</sub>O<sub>3</sub>

Framework group C1[X(C<sub>8</sub>H<sub>14</sub>O<sub>3</sub>)]

Deg. of freedom 69

Full point group C1 NOp 1

Largest Abelian subgroup C1 NOp 1

Largest concise Abelian subgroup C1 NOp 1

Standard orientation:

| Center<br>Number | Atomic<br>Number | Atomic<br>Type | Coordinates (Angstroms) |           |           |
|------------------|------------------|----------------|-------------------------|-----------|-----------|
|                  |                  |                | X                       | Y         | Z         |
| 1                | 6                | 0              | 0.534353                | 0.949192  | -0.087337 |
| 2                | 6                | 0              | -0.087926               | -0.287430 | -0.275675 |
| 3                | 6                | 0              | 0.657474                | -1.458063 | -0.288332 |
| 4                | 6                | 0              | 2.031642                | -1.412640 | -0.104948 |

|    |   |   |           |           |           |
|----|---|---|-----------|-----------|-----------|
| 5  | 6 | 0 | 2.686023  | -0.200719 | 0.097870  |
| 6  | 6 | 0 | 1.914718  | 0.958964  | 0.098445  |
| 7  | 1 | 0 | 2.599896  | -2.336340 | -0.120303 |
| 8  | 8 | 0 | -1.436091 | -0.402231 | -0.480354 |
| 9  | 1 | 0 | -1.938058 | 0.417701  | -0.301802 |
| 10 | 8 | 0 | -3.779150 | -1.595147 | 0.468060  |
| 11 | 1 | 0 | -4.263651 | -2.245491 | -0.049607 |
| 12 | 1 | 0 | -2.880016 | -1.565495 | 0.100371  |
| 13 | 8 | 0 | -3.553882 | 1.145068  | 0.223394  |
| 14 | 1 | 0 | -3.974292 | 0.269652  | 0.316726  |
| 15 | 1 | 0 | -4.120377 | 1.663568  | -0.356071 |
| 16 | 1 | 0 | 2.404315  | 1.917028  | 0.244098  |
| 17 | 1 | 0 | 0.147984  | -2.401458 | -0.445603 |
| 18 | 6 | 0 | -0.260069 | 2.226802  | -0.100502 |
| 19 | 1 | 0 | -0.759892 | 2.377713  | -1.062038 |
| 20 | 1 | 0 | -1.035879 | 2.233685  | 0.669433  |
| 21 | 1 | 0 | 0.390605  | 3.083275  | 0.073440  |
| 22 | 6 | 0 | 4.172815  | -0.143938 | 0.333915  |
| 23 | 1 | 0 | 4.600987  | 0.783051  | -0.051420 |
| 24 | 1 | 0 | 4.405073  | -0.191613 | 1.401860  |
| 25 | 1 | 0 | 4.682116  | -0.979811 | -0.148488 |

Rotational constants (GHZ): 1.9418747 0.4959590 0.4051853  
Standard basis: 6-311+G(d,p) (5D, 7F)

#### 2,4-dimethylphenolate

Electronic Energy -538.432575

Stoichiometry C8H13O3(1-)

Framework group C1[X(C8H13O3)]

Deg. of freedom 66

Full point group C1 NOp 1

Largest Abelian subgroup C1 NOp 1

Largest concise Abelian subgroup C1 NOp 1

Standard orientation:

| Center<br>Number | Atomic<br>Number | Atomic<br>Type | Coordinates (Angstroms) |           |           |
|------------------|------------------|----------------|-------------------------|-----------|-----------|
|                  |                  |                | X                       | Y         | Z         |
| 1                | 6                | 0              | -0.422160               | -1.374535 | -0.213073 |
| 2                | 6                | 0              | 0.263806                | -0.149389 | -0.306981 |
| 3                | 6                | 0              | -0.512139               | 1.035138  | -0.178094 |
| 4                | 6                | 0              | -1.880981               | 0.942658  | 0.031780  |
| 5                | 6                | 0              | -2.557667               | -0.277102 | 0.127795  |
| 6                | 6                | 0              | -1.795480               | -1.432472 | -0.000816 |
| 7                | 1                | 0              | 0.150746                | -2.290937 | -0.314344 |
| 8                | 1                | 0              | -2.450469               | 1.864948  | 0.124357  |
| 9                | 8                | 0              | 1.559316                | -0.090733 | -0.514097 |
| 10               | 8                | 0              | 3.370021                | -1.850134 | 0.157500  |
| 11               | 1                | 0              | 3.618701                | -2.393031 | -0.595071 |
| 12               | 1                | 0              | 2.606266                | -1.278792 | -0.150334 |
| 13               | 8                | 0              | 3.621479                | 1.128127  | 0.638387  |
| 14               | 1                | 0              | 2.766603                | 0.850202  | 0.222969  |
| 15               | 1                | 0              | 4.088478                | 0.286677  | 0.704206  |
| 16               | 1                | 0              | -2.280446               | -2.402523 | 0.063956  |
| 17               | 6                | 0              | 0.172789                | 2.369390  | -0.278529 |
| 18               | 1                | 0              | 0.925639                | 2.493815  | 0.505235  |
| 19               | 1                | 0              | 0.700128                | 2.475124  | -1.231037 |
| 20               | 1                | 0              | -0.545485               | 3.186736  | -0.191683 |
| 21               | 6                | 0              | -4.045508               | -0.325764 | 0.368995  |
| 22               | 1                | 0              | -4.310523               | 0.069415  | 1.354468  |
| 23               | 1                | 0              | -4.595175               | 0.263752  | -0.370158 |
| 24               | 1                | 0              | -4.416940               | -1.351011 | 0.316657  |

Rotational constants (GHZ): 1.7782764 0.5428769 0.4307223

#### 2,6-diisopropylphenol

Electronic Energy -696.094172

Stoichiometry C12H22O3

Framework group C1[X(C12H22O3)]

Deg. of freedom 105

Full point group C1 NOp 1

Largest Abelian subgroup C1 NOp 1

Largest concise Abelian subgroup C1    NOp 1  
Standard orientation:

| Center<br>Number | Atomic<br>Number | Atomic<br>Type | Coordinates (Angstroms) |           |           |
|------------------|------------------|----------------|-------------------------|-----------|-----------|
|                  |                  |                | X                       | Y         | Z         |
| 1                | 6                | 0              | 1.117396                | -1.021888 | -0.079110 |
| 2                | 6                | 0              | -0.059336               | -0.266160 | -0.133653 |
| 3                | 6                | 0              | -1.329336               | -0.855185 | -0.117149 |
| 4                | 6                | 0              | -1.401326               | -2.240179 | -0.035297 |
| 5                | 6                | 0              | -0.253509               | -3.015761 | 0.023384  |
| 6                | 6                | 0              | 0.989566                | -2.405927 | -0.001396 |
| 7                | 1                | 0              | -2.369126               | -2.724927 | -0.026571 |
| 8                | 1                | 0              | -0.328227               | -4.094759 | 0.082251  |
| 9                | 8                | 0              | -0.028055               | 1.102016  | -0.199083 |
| 10               | 1                | 0              | 0.856668                | 1.476925  | -0.359194 |
| 11               | 8                | 0              | -0.845787               | 3.742564  | -0.106490 |
| 12               | 1                | 0              | -1.323768               | 4.110059  | 0.640522  |
| 13               | 1                | 0              | -0.937047               | 2.776469  | -0.053148 |
| 14               | 8                | 0              | 1.790018                | 3.110565  | -0.526348 |
| 15               | 1                | 0              | 0.979678                | 3.636725  | -0.389644 |
| 16               | 1                | 0              | 2.242963                | 3.489411  | -1.283117 |
| 17               | 1                | 0              | 1.879523                | -3.020594 | 0.037492  |
| 18               | 6                | 0              | -2.562322               | 0.028687  | -0.162134 |
| 19               | 1                | 0              | -2.332222               | 0.856323  | -0.839066 |
| 20               | 6                | 0              | -2.850961               | 0.624183  | 1.223221  |
| 21               | 1                | 0              | -1.977828               | 1.140753  | 1.625810  |
| 22               | 1                | 0              | -3.682729               | 1.332694  | 1.176710  |
| 23               | 1                | 0              | -3.121409               | -0.165945 | 1.928736  |
| 24               | 6                | 0              | -3.805197               | -0.671816 | -0.708622 |
| 25               | 1                | 0              | -4.617238               | 0.049475  | -0.825344 |
| 26               | 1                | 0              | -3.615120               | -1.126653 | -1.682882 |
| 27               | 1                | 0              | -4.162477               | -1.452961 | -0.032885 |
| 28               | 6                | 0              | 2.473554                | -0.336215 | -0.057428 |
| 29               | 1                | 0              | 2.429318                | 0.529117  | -0.727970 |
| 30               | 6                | 0              | 2.794371                | 0.187419  | 1.349601  |
| 31               | 1                | 0              | 3.736090                | 0.741235  | 1.350524  |
| 32               | 1                | 0              | 2.015256                | 0.854872  | 1.720588  |
| 33               | 1                | 0              | 2.885139                | -0.647045 | 2.049844  |
| 34               | 6                | 0              | 3.614746                | -1.212547 | -0.573334 |
| 35               | 1                | 0              | 3.393276                | -1.624325 | -1.560020 |
| 36               | 1                | 0              | 4.529934                | -0.621354 | -0.649150 |
| 37               | 1                | 0              | 3.824061                | -2.044314 | 0.103391  |

Rotational constants (GHZ):      0.5782226      0.4700602      0.2833303

## 2,6-diisopropylphenolate

Electronic Energy -695.624897

Stoichiometry C12H21O3(1-)

Framework group C1[X(C12H21O3)]

Deg. of freedom 102

Full point group                    C1    NOp 1

Largest Abelian subgroup        C1    NOp 1

Largest concise Abelian subgroup C1    NOp 1

Standard orientation:

| Center<br>Number | Atomic<br>Number | Atomic<br>Type | Coordinates (Angstroms) |           |           |
|------------------|------------------|----------------|-------------------------|-----------|-----------|
|                  |                  |                | X                       | Y         | Z         |
| 1                | 6                | 0              | 1.358986                | -0.756285 | -0.046465 |
| 2                | 6                | 0              | 0.069902                | -0.140274 | -0.060458 |
| 3                | 6                | 0              | -1.075140               | -0.989154 | -0.116270 |
| 4                | 6                | 0              | -0.913596               | -2.367445 | -0.131883 |
| 5                | 6                | 0              | 0.343743                | -2.959020 | -0.105504 |
| 6                | 6                | 0              | 1.466768                | -2.138370 | -0.066545 |
| 7                | 1                | 0              | -1.791396               | -3.005336 | -0.173193 |
| 8                | 1                | 0              | 0.448086                | -4.038291 | -0.124417 |
| 9                | 8                | 0              | -0.037165               | 1.153091  | -0.028665 |
| 10               | 8                | 0              | 0.475970                | 3.387682  | -1.575367 |
| 11               | 1                | 0              | -0.276447               | 3.771058  | -1.108414 |
| 12               | 1                | 0              | 0.496613                | 2.494700  | -1.174380 |
| 13               | 8                | 0              | -1.556722               | 3.193460  | 0.641465  |



|    |   |   |           |           |           |
|----|---|---|-----------|-----------|-----------|
| 14 | 1 | 0 | -1.095562 | 2.337698  | 0.420597  |
| 15 | 1 | 0 | -1.091015 | 3.512232  | 1.417104  |
| 16 | 1 | 0 | 2.450004  | -2.597917 | -0.057373 |
| 17 | 6 | 0 | -2.442748 | -0.336507 | -0.121060 |
| 18 | 1 | 0 | -2.314434 | 0.637401  | -0.599861 |
| 19 | 6 | 0 | -3.500267 | -1.109528 | -0.910583 |
| 20 | 1 | 0 | -3.747593 | -2.064541 | -0.436667 |
| 21 | 1 | 0 | -4.425839 | -0.528872 | -0.971796 |
| 22 | 1 | 0 | -3.160930 | -1.318845 | -1.927934 |
| 23 | 6 | 0 | -2.930358 | -0.075407 | 1.309879  |
| 24 | 1 | 0 | -2.195516 | 0.509126  | 1.864194  |
| 25 | 1 | 0 | -3.872849 | 0.481806  | 1.311803  |
| 26 | 1 | 0 | -3.086065 | -1.022011 | 1.838593  |
| 27 | 6 | 0 | 2.564827  | 0.159850  | 0.019909  |
| 28 | 1 | 0 | 2.342548  | 1.010051  | -0.631513 |
| 29 | 6 | 0 | 3.867579  | -0.475265 | -0.463948 |
| 30 | 1 | 0 | 4.664041  | 0.274433  | -0.491037 |
| 31 | 1 | 0 | 4.200172  | -1.278790 | 0.200896  |
| 32 | 1 | 0 | 3.760883  | -0.893502 | -1.468011 |
| 33 | 6 | 0 | 2.739383  | 0.727475  | 1.434553  |
| 34 | 1 | 0 | 3.553397  | 1.460086  | 1.467975  |
| 35 | 1 | 0 | 1.819589  | 1.219667  | 1.750628  |
| 36 | 1 | 0 | 2.971170  | -0.074433 | 2.143591  |

-----  
Rotational constants (GHZ):        0.5861723        0.4602902        0.2994736

# 2-methyl-4-terz-butylphenol

Electronic Energy -656.796670

Stoichiometry C11H20O3

Framework group C1[X(C11H20O3)]

Deg. of freedom 96

Full point group C1 NOp 1

Largest Abelian subgroup C1 NOp 1

Largest concise Abelian subgroup C1 NOp 1

Standard orientation:

| Center<br>Number | Atomic<br>Number | Atomic<br>Type | Coordinates (Angstroms) |           |           |
|------------------|------------------|----------------|-------------------------|-----------|-----------|
|                  |                  |                | X                       | Y         | Z         |
| 1                | 6                | 0              | 0.984831                | -1.396329 | -0.211543 |
| 2                | 6                | 0              | -0.397022               | -1.450005 | -0.348754 |
| 3                | 6                | 0              | -1.150543               | -0.288779 | -0.316262 |
| 4                | 6                | 0              | -0.526975               | 0.951807  | -0.150763 |
| 5                | 6                | 0              | 0.856153                | 0.968640  | -0.012079 |
| 6                | 6                | 0              | 1.645799                | -0.183905 | -0.037194 |
| 7                | 1                | 0              | 1.537021                | -2.325698 | -0.241519 |
| 8                | 1                | 0              | -0.902206               | -2.399614 | -0.481070 |
| 9                | 1                | 0              | 1.328967                | 1.935941  | 0.117691  |
| 10               | 8                | 0              | -2.503937               | -0.410321 | -0.472398 |
| 11               | 1                | 0              | -3.003610               | 0.406956  | -0.276429 |
| 12               | 8                | 0              | -4.611026               | 1.120203  | 0.295212  |
| 13               | 1                | 0              | -5.193481               | 1.644167  | -0.263071 |
| 14               | 1                | 0              | -5.025299               | 0.241635  | 0.386316  |
| 15               | 8                | 0              | -4.821655               | -1.624544 | 0.507724  |
| 16               | 1                | 0              | -3.930025               | -1.587072 | 0.122971  |
| 17               | 1                | 0              | -5.314836               | -2.267960 | -0.010362 |
| 18               | 6                | 0              | 3.166427                | -0.073622 | 0.121534  |
| 19               | 6                | 0              | 3.741508                | 0.795492  | -1.010042 |
| 20               | 1                | 0              | 3.322885                | 1.803521  | -0.998471 |
| 21               | 1                | 0              | 4.826322                | 0.882927  | -0.905373 |
| 22               | 1                | 0              | 3.528982                | 0.352880  | -1.986340 |
| 23               | 6                | 0              | 3.498025                | 0.575895  | 1.476034  |
| 24               | 1                | 0              | 3.108526                | -0.025420 | 2.301233  |
| 25               | 1                | 0              | 4.581075                | 0.660975  | 1.599189  |
| 26               | 1                | 0              | 3.073070                | 1.577908  | 1.559022  |
| 27               | 6                | 0              | 3.852822                | -1.442347 | 0.067906  |
| 28               | 1                | 0              | 3.508803                | -2.100749 | 0.868897  |
| 29               | 1                | 0              | 3.681706                | -1.945373 | -0.886615 |
| 30               | 1                | 0              | 4.931061                | -1.313106 | 0.185500  |
| 31               | 6                | 0              | -1.328954               | 2.224826  | -0.134889 |
| 32               | 1                | 0              | -1.866397               | 2.371209  | -1.076620 |
| 33               | 1                | 0              | -2.074532               | 2.228431  | 0.664451  |

34      1      0    -0.677522   3.085699   0.012616

---

Rotational constants (GHZ):      1.3749188      0.2733416      0.2437086

**2-methyl-4-terz-butylphenolate**

Electronic Energy -656.327999  
 Stoichiometry C11H19O3(1-)  
 Framework group C1[X(C11H19O3)]  
 Deg. of freedom 93  
 Full point group C1 NOp 1  
 Largest Abelian subgroup C1 NOp 1  
 Largest concise Abelian subgroup C1 NOp 1  
 Standard orientation:

| Center<br>Number | Atomic<br>Number | Atomic<br>Type | Coordinates (Angstroms) |           |           |
|------------------|------------------|----------------|-------------------------|-----------|-----------|
|                  |                  |                | X                       | Y         | Z         |
| 1                | 6                | 0              | -0.808052               | 1.025357  | 0.084874  |
| 2                | 6                | 0              | 0.570056                | 1.071601  | 0.233095  |
| 3                | 6                | 0              | 1.309991                | -0.137017 | 0.342400  |
| 4                | 6                | 0              | 0.574136                | -1.333517 | 0.289654  |
| 5                | 6                | 0              | -0.809354               | -1.344989 | 0.138180  |
| 6                | 6                | 0              | -1.542612               | -0.166995 | 0.031598  |
| 7                | 1                | 0              | -1.332700               | 1.973470  | 0.007375  |
| 8                | 1                | 0              | 1.114856                | -2.271282 | 0.372713  |
| 9                | 1                | 0              | -1.309431               | -2.305311 | 0.105793  |
| 10               | 8                | 0              | 2.614079                | -0.123658 | 0.492951  |
| 11               | 8                | 0              | 4.350336                | -1.939404 | -0.224267 |
| 12               | 1                | 0              | 4.599694                | -2.490792 | 0.521890  |
| 13               | 1                | 0              | 3.612724                | -1.344904 | 0.102316  |
| 14               | 8                | 0              | 4.690519                | 1.043111  | -0.683710 |
| 15               | 1                | 0              | 3.834573                | 0.788566  | -0.255665 |
| 16               | 1                | 0              | 5.128343                | 0.187819  | -0.767810 |
| 17               | 6                | 0              | -3.066163               | -0.128392 | -0.132837 |
| 18               | 6                | 0              | -3.699986               | 0.632878  | 1.044683  |
| 19               | 1                | 0              | -3.331291               | 1.658742  | 1.105009  |
| 20               | 1                | 0              | -4.787579               | 0.673994  | 0.933591  |
| 21               | 1                | 0              | -3.473778               | 0.137950  | 1.992620  |
| 22               | 6                | 0              | -3.433498               | 0.587276  | -1.444549 |
| 23               | 1                | 0              | -3.013211               | 0.059718  | -2.304618 |
| 24               | 1                | 0              | -4.519804               | 0.627122  | -1.567863 |
| 25               | 1                | 0              | -3.057633               | 1.612116  | -1.462520 |
| 26               | 6                | 0              | -3.678203               | -1.532643 | -0.172937 |
| 27               | 1                | 0              | -3.291980               | -2.118952 | -1.010048 |
| 28               | 1                | 0              | -3.483482               | -2.085858 | 0.748841  |
| 29               | 1                | 0              | -4.761830               | -1.456993 | -0.292246 |
| 30               | 6                | 0              | 1.303881                | 2.382646  | 0.284765  |
| 31               | 1                | 0              | 1.873230                | 2.483625  | 1.213270  |
| 32               | 1                | 0              | 2.027451                | 2.469952  | -0.530955 |
| 33               | 1                | 0              | 0.611185                | 3.223398  | 0.214962  |

Rotational constants (GHZ):      1.2874803      0.2915888      0.2560299

**4-bromothymol**

Electronic Energy -3191.144679  
 Stoichiometry C10H17BrO3  
 Framework group C1[X(C10H17BrO3)]  
 Deg. of freedom 87  
 Full point group C1 NOp 1  
 Largest Abelian subgroup C1 NOp 1  
 Largest concise Abelian subgroup C1 NOp 1  
 Standard orientation:

| Center<br>Number | Atomic<br>Number | Atomic<br>Type | Coordinates (Angstroms) |           |           |
|------------------|------------------|----------------|-------------------------|-----------|-----------|
|                  |                  |                | X                       | Y         | Z         |
| 1                | 6                | 0              | -1.413955               | 2.156170  | -0.299924 |
| 2                | 1                | 0              | -2.257457               | 1.912828  | -0.951041 |
| 3                | 6                | 0              | -0.543058               | 0.916588  | -0.236902 |
| 4                | 6                | 0              | 0.838119                | 0.974934  | -0.104127 |
| 5                | 6                | 0              | -1.126544               | -0.354954 | -0.277834 |
| 6                | 6                | 0              | 1.604158                | -0.178073 | -0.014708 |

|    |    |   |           |           |           |
|----|----|---|-----------|-----------|-----------|
| 7  | 1  | 0 | 1.332430  | 1.936215  | -0.072311 |
| 8  | 6  | 0 | -0.348963 | -1.502970 | -0.191225 |
| 9  | 6  | 0 | 1.036481  | -1.446926 | -0.056360 |
| 10 | 1  | 0 | -0.835314 | -2.471765 | -0.230189 |
| 11 | 6  | 0 | -0.707501 | 3.374403  | -0.892434 |
| 12 | 1  | 0 | -1.421162 | 4.191962  | -1.014375 |
| 13 | 1  | 0 | 0.092089  | 3.737856  | -0.242055 |
| 14 | 1  | 0 | -0.276099 | 3.153469  | -1.871145 |
| 15 | 6  | 0 | -1.981174 | 2.483343  | 1.088147  |
| 16 | 1  | 0 | -2.679254 | 3.322144  | 1.030971  |
| 17 | 1  | 0 | -2.509376 | 1.629255  | 1.516048  |
| 18 | 1  | 0 | -1.175995 | 2.758913  | 1.774818  |
| 19 | 6  | 0 | 1.841640  | -2.711478 | 0.034358  |
| 20 | 1  | 0 | 1.191557  | -3.584252 | -0.017551 |
| 21 | 1  | 0 | 2.568375  | -2.776058 | -0.778358 |
| 22 | 1  | 0 | 2.402216  | -2.756304 | 0.970584  |
| 23 | 8  | 0 | -2.477872 | -0.434930 | -0.411292 |
| 24 | 1  | 0 | -2.791981 | -1.365910 | -0.433634 |
| 25 | 8  | 0 | -5.167463 | -0.321713 | 0.512151  |
| 26 | 1  | 0 | -4.295888 | 0.085945  | 0.396944  |
| 27 | 1  | 0 | -5.499309 | -0.015678 | 1.362012  |
| 28 | 8  | 0 | -3.937411 | -2.679731 | -0.184042 |
| 29 | 1  | 0 | -4.293850 | -3.196497 | -0.913450 |
| 30 | 1  | 0 | -4.643720 | -2.069559 | 0.101806  |
| 31 | 35 | 0 | 3.501700  | 0.020920  | 0.164070  |

Rotational constants (GHZ):      0.6973444      0.2396645

#### 4-bromothymolate

Electronic Energy -3190.677936

Stoichiometry C10H16BrO3(1-)

Framework group C1[X(C10H16BrO3)]

Deg. of freedom 84

Full point group C1 NOp 1

Largest Abelian subgroup C1 NOp 1

Largest concise Abelian subgroup C1 NOp 1

Standard orientation:

| Center<br>Number | Atomic<br>Number | Atomic<br>Type | Coordinates (Angstroms) |           |           |
|------------------|------------------|----------------|-------------------------|-----------|-----------|
|                  |                  |                | X                       | Y         | Z         |
| 1                | 6                | 0              | 1.569883                | 1.998840  | -0.224633 |
| 2                | 1                | 0              | 2.410230                | 1.703475  | -0.859757 |
| 3                | 6                | 0              | 0.635129                | 0.807091  | -0.180669 |
| 4                | 6                | 0              | -0.740405               | 0.949497  | -0.090180 |
| 5                | 6                | 0              | 1.191904                | -0.505418 | -0.203992 |
| 6                | 6                | 0              | -1.584161               | -0.152573 | -0.019821 |
| 7                | 1                | 0              | -1.177167               | 1.940061  | -0.075579 |
| 8                | 6                | 0              | 0.293613                | -1.592732 | -0.136417 |
| 9                | 6                | 0              | -1.087332               | -1.451929 | -0.042260 |
| 10               | 1                | 0              | 0.716626                | -2.592157 | -0.160095 |
| 11               | 6                | 0              | 2.137622                | 2.296001  | 1.170002  |
| 12               | 1                | 0              | 2.885766                | 3.092779  | 1.126276  |
| 13               | 1                | 0              | 1.339922                | 2.619175  | 1.845571  |
| 14               | 1                | 0              | 2.609189                | 1.410537  | 1.598806  |
| 15               | 6                | 0              | 0.950895                | 3.260035  | -0.826039 |
| 16               | 1                | 0              | 1.711549                | 4.037837  | -0.928514 |
| 17               | 1                | 0              | 0.527641                | 3.069181  | -1.815027 |
| 18               | 1                | 0              | 0.157798                | 3.666685  | -0.192584 |
| 19               | 6                | 0              | -1.971620               | -2.666537 | 0.026922  |
| 20               | 1                | 0              | -2.679078               | -2.692435 | -0.805351 |
| 21               | 1                | 0              | -1.373198               | -3.576980 | -0.005969 |
| 22               | 1                | 0              | -2.561320               | -2.678327 | 0.946668  |
| 23               | 8                | 0              | 2.477235                | -0.700662 | -0.293642 |
| 24               | 8                | 0              | 4.047917                | -2.763200 | 0.066201  |
| 25               | 1                | 0              | 4.041213                | -3.352200 | -0.692869 |
| 26               | 1                | 0              | 3.338926                | -2.079917 | -0.104408 |
| 27               | 8                | 0              | 4.996676                | 0.064785  | 0.170310  |
| 28               | 1                | 0              | 4.024368                | 0.028906  | 0.020067  |
| 29               | 1                | 0              | 5.220431                | -0.874722 | 0.182382  |
| 30               | 35               | 0              | -3.478306               | 0.166202  | 0.101141  |

Rotational constants (GHZ):      0.7297818      0.2430774      0.1882574

#### 4-chlorothymol

Electronic Energy -1077.127149

Stoichiometry C10H17ClO3

Framework group C1[X(C10H17ClO3)]

Deg. of freedom 87

Full point group C1 NOp 1

Largest Abelian subgroup C1 NOp 1

Largest concise Abelian subgroup C1 NOp 1

Standard orientation:

| Center<br>Number | Atomic<br>Number | Atomic<br>Type | Coordinates (Angstroms) |           |           |
|------------------|------------------|----------------|-------------------------|-----------|-----------|
|                  |                  |                | X                       | Y         | Z         |
| 1                | 6                | 0              | 0.114163                | -1.447452 | -0.271486 |
| 2                | 6                | 0              | -0.628238               | -0.273697 | -0.240127 |
| 3                | 6                | 0              | -0.011991               | 0.966412  | -0.034688 |
| 4                | 6                | 0              | 1.366618                | 0.967142  | 0.132386  |
| 5                | 6                | 0              | 2.097332                | -0.210407 | 0.094062  |
| 6                | 6                | 0              | 1.497125                | -1.447454 | -0.107163 |
| 7                | 1                | 0              | -0.399429               | -2.390049 | -0.426755 |
| 8                | 1                | 0              | 1.890110                | 1.898699  | 0.298929  |
| 9                | 8                | 0              | -1.979801               | -0.296309 | -0.406105 |
| 10               | 1                | 0              | -2.311194               | -1.212030 | -0.538864 |
| 11               | 6                | 0              | -0.840602               | 2.236509  | -0.033585 |
| 12               | 1                | 0              | -1.782997               | 1.996729  | 0.466684  |
| 13               | 6                | 0              | -1.179054               | 2.658311  | -1.469856 |
| 14               | 1                | 0              | -1.679835               | 1.854107  | -2.010604 |
| 15               | 1                | 0              | -1.837770               | 3.530386  | -1.467953 |
| 16               | 1                | 0              | -0.268622               | 2.923356  | -2.014552 |
| 17               | 6                | 0              | -0.194743               | 3.392219  | 0.728114  |
| 18               | 1                | 0              | -0.891927               | 4.230644  | 0.786085  |
| 19               | 1                | 0              | 0.073867                | 3.105386  | 1.747179  |
| 20               | 1                | 0              | 0.706649                | 3.755168  | 0.227652  |
| 21               | 6                | 0              | 2.275738                | -2.730919 | -0.145757 |
| 22               | 1                | 0              | 2.815388                | -2.893616 | 0.789782  |
| 23               | 1                | 0              | 1.610686                | -3.578173 | -0.309438 |
| 24               | 1                | 0              | 3.018829                | -2.717916 | -0.946156 |
| 25               | 8                | 0              | -4.346373               | -0.544104 | 1.195535  |
| 26               | 1                | 0              | -3.532425               | -0.083249 | 0.940339  |
| 27               | 1                | 0              | -4.419455               | -0.455730 | 2.151056  |
| 28               | 8                | 0              | -3.353798               | -2.611723 | -0.315839 |
| 29               | 1                | 0              | -3.885884               | -2.981278 | -1.027473 |
| 30               | 1                | 0              | -3.963230               | -2.126638 | 0.272330  |
| 31               | 17               | 0              | 3.842290                | -0.111923 | 0.315390  |

Rotational constants (GHZ):      0.6526065      0.3495687      0.2473178

#### 4-chlorothymolate

Electronic Energy -1076.659978

Stoichiometry C10H16ClO3(1-)

Framework group C1[X(C10H16ClO3)]

Deg. of freedom 84

Full point group C1 NOp 1

Largest Abelian subgroup C1 NOp 1

Largest concise Abelian subgroup C1 NOp 1

Standard orientation:

| Center<br>Number | Atomic<br>Number | Atomic<br>Type | Coordinates (Angstroms) |           |           |
|------------------|------------------|----------------|-------------------------|-----------|-----------|
|                  |                  |                | X                       | Y         | Z         |
| 1                | 6                | 0              | 0.307575                | -1.545590 | -0.129715 |
| 2                | 6                | 0              | -0.622766               | -0.487030 | -0.215296 |
| 3                | 6                | 0              | -0.108808               | 0.842174  | -0.178082 |
| 4                | 6                | 0              | 1.259441                | 1.028545  | -0.057442 |
| 5                | 6                | 0              | 2.134372                | -0.045912 | 0.029409  |
| 6                | 6                | 0              | 1.680410                | -1.359431 | -0.005231 |
| 7                | 1                | 0              | -0.082002               | -2.558202 | -0.163202 |
| 8                | 1                | 0              | 1.668356                | 2.031055  | -0.031409 |
| 9                | 8                | 0              | -1.900397               | -0.722624 | -0.333693 |
| 10               | 6                | 0              | -1.079395               | 2.003916  | -0.239420 |

|    |    |   |           |           |           |
|----|----|---|-----------|-----------|-----------|
| 11 | 1  | 0 | -1.906485 | 1.675596  | -0.875463 |
| 12 | 6  | 0 | -0.495029 | 3.277092  | -0.850459 |
| 13 | 1  | 0 | -0.060144 | 3.088552  | -1.834832 |
| 14 | 1  | 0 | -1.277888 | 4.030749  | -0.965714 |
| 15 | 1  | 0 | 0.281710  | 3.713967  | -0.216876 |
| 16 | 6  | 0 | -1.663813 | 2.297652  | 1.149033  |
| 17 | 1  | 0 | -2.435480 | 3.070937  | 1.093469  |
| 18 | 1  | 0 | -2.110783 | 1.402588  | 1.584430  |
| 19 | 1  | 0 | -0.880257 | 2.651134  | 1.825997  |
| 20 | 6  | 0 | 2.611071  | -2.537429 | 0.082802  |
| 21 | 1  | 0 | 2.050928  | -3.471391 | 0.037942  |
| 22 | 1  | 0 | 3.336349  | -2.534218 | -0.734499 |
| 23 | 1  | 0 | 3.181951  | -2.525548 | 1.014428  |
| 24 | 8  | 0 | -3.361018 | -2.871412 | -0.034340 |
| 25 | 1  | 0 | -3.358366 | -3.411843 | -0.828740 |
| 26 | 1  | 0 | -2.690924 | -2.144931 | -0.188067 |
| 27 | 8  | 0 | -4.429020 | -0.113188 | 0.288949  |
| 28 | 1  | 0 | -3.464634 | -0.090790 | 0.092070  |
| 29 | 1  | 0 | -4.605750 | -1.062260 | 0.254308  |
| 30 | 17 | 0 | 3.866974  | 0.291086  | 0.179721  |

-----

|                             |           |           |           |
|-----------------------------|-----------|-----------|-----------|
| Rotational constants (GHZ): | 0.7266745 | 0.3455481 | 0.2444736 |
|-----------------------------|-----------|-----------|-----------|

#### 4-methoxyphenol

Electronic Energy -574.807648

Stoichiometry C7H12O4

Framework group C1[X(C7H12O4)]

Deg. of freedom 63

Full point group C1 NOp 1

Largest Abelian subgroup C1 NOp 1

Largest concise Abelian subgroup C1 NOp 1

Standard orientation:

| Center<br>Number | Atomic<br>Number | Atomic<br>Type | Coordinates (Angstroms) |           |           |
|------------------|------------------|----------------|-------------------------|-----------|-----------|
|                  |                  |                | X                       | Y         | Z         |
| 1                | 6                | 0              | 1.997292                | 1.079941  | -0.533056 |
| 2                | 6                | 0              | 0.760395                | 1.674488  | -0.336983 |
| 3                | 6                | 0              | -0.329027               | 0.909290  | 0.074707  |
| 4                | 6                | 0              | -0.165375               | -0.458008 | 0.287717  |
| 5                | 6                | 0              | 1.077585                | -1.047652 | 0.093801  |
| 6                | 6                | 0              | 2.159063                | -0.283018 | -0.316375 |
| 7                | 1                | 0              | 2.842299                | 1.672631  | -0.863537 |
| 8                | 1                | 0              | 0.623777                | 2.735495  | -0.507699 |
| 9                | 1                | 0              | -1.012791               | -1.054167 | 0.604246  |
| 10               | 1                | 0              | 1.210797                | -2.110899 | 0.254877  |
| 11               | 8                | 0              | -1.519044               | 1.536896  | 0.248661  |
| 12               | 1                | 0              | -2.218518               | 0.906767  | 0.535758  |
| 13               | 8                | 0              | -3.461603               | -0.153117 | 1.039999  |
| 14               | 1                | 0              | -3.940566               | 0.060476  | 1.846651  |
| 15               | 1                | 0              | -4.130193               | -0.448274 | 0.387436  |
| 16               | 8                | 0              | -5.307896               | -0.988280 | -0.805992 |
| 17               | 1                | 0              | -5.419586               | -0.467187 | -1.608422 |
| 18               | 1                | 0              | -5.284775               | -1.907927 | -1.091596 |
| 19               | 8                | 0              | 3.377359                | -0.889990 | -0.551777 |
| 20               | 6                | 0              | 4.318512                | -0.751396 | 0.509155  |
| 21               | 1                | 0              | 5.227777                | -1.260290 | 0.194151  |
| 22               | 1                | 0              | 4.540836                | 0.301873  | 0.702039  |
| 23               | 1                | 0              | 3.939749                | -1.214425 | 1.425180  |

-----

|                             |           |           |           |
|-----------------------------|-----------|-----------|-----------|
| Rotational constants (GHZ): | 2.2281291 | 0.3515143 | 0.3252443 |
|-----------------------------|-----------|-----------|-----------|

#### 4-methoxyphenolate

Electronic Energy -574.339591

Stoichiometry C7H11O4(1-)

Framework group C1[X(C7H11O4)]

Deg. of freedom 60

Full point group C1 NOp 1

Largest Abelian subgroup C1 NOp 1

Largest concise Abelian subgroup C1 NOp 1

Standard orientation:

| Center<br>Number            | Atomic<br>Number | Atomic<br>Type | Coordinates (Angstroms) |           |           |
|-----------------------------|------------------|----------------|-------------------------|-----------|-----------|
|                             |                  |                | X                       | Y         | Z         |
| 1                           | 6                | 0              | 1.288567                | -1.200996 | -0.244265 |
| 2                           | 6                | 0              | -0.094854               | -1.202345 | -0.138756 |
| 3                           | 6                | 0              | -0.836339               | -0.000410 | -0.085550 |
| 4                           | 6                | 0              | -0.092268               | 1.199512  | -0.148816 |
| 5                           | 6                | 0              | 1.291001                | 1.194313  | -0.255390 |
| 6                           | 6                | 0              | 1.990103                | -0.004335 | -0.303067 |
| 7                           | 1                | 0              | 1.834628                | -2.137543 | -0.288824 |
| 8                           | 1                | 0              | -0.632907               | -2.143131 | -0.098805 |
| 9                           | 1                | 0              | -0.628329               | 2.141796  | -0.118542 |
| 10                          | 1                | 0              | 1.838833                | 2.129370  | -0.308861 |
| 11                          | 8                | 0              | -2.144864               | 0.001350  | 0.013286  |
| 12                          | 8                | 0              | -3.617764               | 2.169691  | 0.074262  |
| 13                          | 1                | 0              | -3.451203               | 2.609300  | 0.911993  |
| 14                          | 1                | 0              | -3.018449               | 1.367737  | 0.065364  |
| 15                          | 8                | 0              | -3.606947               | -2.160226 | 0.281758  |
| 16                          | 1                | 0              | -3.014926               | -1.362349 | 0.160357  |
| 17                          | 1                | 0              | -3.581356               | -2.632063 | -0.554621 |
| 18                          | 8                | 0              | 3.370794                | -0.006757 | -0.450790 |
| 19                          | 6                | 0              | 4.086204                | 0.007675  | 0.778429  |
| 20                          | 1                | 0              | 3.851330                | -0.877190 | 1.378197  |
| 21                          | 1                | 0              | 5.147371                | 0.005288  | 0.532308  |
| 22                          | 1                | 0              | 3.850770                | 0.905847  | 1.357807  |
| Rotational constants (GHZ): |                  |                | 1.8247603               | 0.4606836 | 0.3790182 |

#### 4-hydroxybenzonitrile

Electronic Energy -552.532032

Stoichiometry C7H9NO3

Framework group C1[X(C7H9NO3)]

Deg. of freedom 54

Full point group C1 NOp 1

Largest Abelian subgroup C1 NOp 1

Largest concise Abelian subgroup C1 NOp 1

Standard orientation:

| Center<br>Number            | Atomic<br>Number | Atomic<br>Type | Coordinates (Angstroms) |           |           |
|-----------------------------|------------------|----------------|-------------------------|-----------|-----------|
|                             |                  |                | X                       | Y         | Z         |
| 1                           | 6                | 0              | 1.760719                | -1.233786 | -0.233659 |
| 2                           | 6                | 0              | 0.410802                | -1.379265 | -0.477235 |
| 3                           | 6                | 0              | -0.429988               | -0.266471 | -0.431992 |
| 4                           | 6                | 0              | 0.092629                | 0.994505  | -0.138720 |
| 5                           | 6                | 0              | 1.444747                | 1.138891  | 0.104307  |
| 6                           | 6                | 0              | 2.289410                | 0.027444  | 0.059009  |
| 7                           | 1                | 0              | 2.412635                | -2.097126 | -0.269129 |
| 8                           | 1                | 0              | -0.010881               | -2.349605 | -0.705633 |
| 9                           | 1                | 0              | -0.565219               | 1.854117  | -0.101794 |
| 10                          | 1                | 0              | 1.850287                | 2.116492  | 0.331222  |
| 11                          | 8                | 0              | -1.739966               | -0.457321 | -0.677920 |
| 12                          | 1                | 0              | -2.255192               | 0.382853  | -0.613263 |
| 13                          | 8                | 0              | -3.462163               | 1.500797  | -0.144653 |
| 14                          | 1                | 0              | -4.036489               | 1.929152  | -0.787331 |
| 15                          | 1                | 0              | -4.000224               | 0.831614  | 0.320538  |
| 16                          | 8                | 0              | -4.173394               | -0.923308 | 0.903977  |
| 17                          | 1                | 0              | -3.316865               | -1.269228 | 0.616522  |
| 18                          | 1                | 0              | -4.290112               | -1.215233 | 1.813730  |
| 19                          | 6                | 0              | 3.686303                | 0.178409  | 0.310336  |
| 20                          | 7                | 0              | 4.812644                | 0.299607  | 0.513092  |
| Rotational constants (GHZ): |                  |                | 2.7056010               | 0.4048195 | 0.3713120 |

#### 4-cyanophenolate

Electronic Energy -552.073689

Stoichiometry C7H8NO3(1-)

Framework group C1[X(C7H8NO3)]

Deg. of freedom 51

Full point group C1 NOp 1

Largest Abelian subgroup C1 NOp 1

Largest concise Abelian subgroup C1 NOp 1

Standard orientation:

| Center<br>Number | Atomic<br>Number | Atomic<br>Type | Coordinates (Angstroms) |           |           |
|------------------|------------------|----------------|-------------------------|-----------|-----------|
|                  |                  |                | X                       | Y         | Z         |
| 1                | 6                | 0              | -1.447784               | 1.203839  | 0.099918  |
| 2                | 6                | 0              | -0.072665               | 1.206143  | 0.100448  |
| 3                | 6                | 0              | 0.674485                | -0.000002 | 0.000006  |
| 4                | 6                | 0              | -0.072664               | -1.206147 | -0.100431 |
| 5                | 6                | 0              | -1.447783               | -1.203845 | -0.099896 |
| 6                | 6                | 0              | -2.162673               | -0.000003 | 0.000013  |
| 7                | 1                | 0              | -1.988483               | 2.140024  | 0.178015  |
| 8                | 1                | 0              | 0.470674                | 2.140474  | 0.178987  |
| 9                | 1                | 0              | 0.470675                | -2.140477 | -0.178974 |
| 10               | 1                | 0              | -1.988482               | -2.140030 | -0.177990 |
| 11               | 8                | 0              | 1.965846                | -0.000001 | 0.000005  |
| 12               | 8                | 0              | 3.471582                | -2.194191 | 0.014082  |
| 13               | 1                | 0              | 3.906521                | -2.206092 | 0.870666  |
| 14               | 1                | 0              | 2.886358                | -1.392139 | 0.022082  |
| 15               | 8                | 0              | 3.471470                | 2.194265  | -0.014187 |
| 16               | 1                | 0              | 2.886307                | 1.392168  | -0.022139 |
| 17               | 1                | 0              | 3.907088                | 2.205648  | -0.870434 |
| 18               | 6                | 0              | -3.582309               | -0.000004 | 0.000017  |
| 19               | 7                | 0              | -4.736213               | -0.000007 | 0.000020  |

Rotational constants (GHZ): 1.9585189 0.4658555 0.3775323

#### 4-nitrophenol

Electronic Energy -664.810429

Stoichiometry C6H9NO5

Framework group C1[X(C6H9NO5)]

Deg. of freedom 57

Full point group C1 NOp 1

Largest Abelian subgroup C1 NOp 1

Largest concise Abelian subgroup C1 NOp 1

Standard orientation:

| Center<br>Number | Atomic<br>Number | Atomic<br>Type | Coordinates (Angstroms) |           |           |
|------------------|------------------|----------------|-------------------------|-----------|-----------|
|                  |                  |                | X                       | Y         | Z         |
| 1                | 6                | 0              | 1.724438                | -1.283635 | 0.286206  |
| 2                | 6                | 0              | 0.447555                | -1.791147 | 0.194445  |
| 3                | 6                | 0              | -0.619675               | -0.955155 | -0.155303 |
| 4                | 6                | 0              | -0.387099               | 0.402115  | -0.412919 |
| 5                | 6                | 0              | 0.891277                | 0.911432  | -0.321777 |
| 6                | 6                | 0              | 1.938512                | 0.066718  | 0.027044  |
| 7                | 1                | 0              | 2.555551                | -1.919473 | 0.555481  |
| 8                | 1                | 0              | 0.251499                | -2.837283 | 0.390018  |
| 9                | 1                | 0              | -1.217060               | 1.041997  | -0.683289 |
| 10               | 1                | 0              | 1.084389                | 1.956366  | -0.517987 |
| 11               | 8                | 0              | -1.837755               | -1.498645 | -0.229715 |
| 12               | 1                | 0              | -2.529050               | -0.834413 | -0.484182 |
| 13               | 8                | 0              | -3.682371               | 0.274100  | -0.905431 |
| 14               | 1                | 0              | -4.149299               | 0.149820  | -1.737703 |
| 15               | 1                | 0              | -4.353332               | 0.539222  | -0.240605 |
| 16               | 8                | 0              | -5.543663               | 1.006126  | 0.950793  |
| 17               | 1                | 0              | -5.797169               | 0.366093  | 1.624621  |
| 18               | 1                | 0              | -5.433181               | 1.844319  | 1.412405  |
| 19               | 7                | 0              | 3.281595                | 0.603627  | 0.123056  |
| 20               | 8                | 0              | 4.191072                | -0.152498 | 0.433713  |
| 21               | 8                | 0              | 3.453523                | 1.791667  | -0.110150 |

Rotational constants (GHZ): 1.9550780 0.3073942 0.2791405

#### 4-nitrophenolate

Electronic Energy -664.352792

Stoichiometry C6H8NO5(1-)

Framework group C1[X(C6H8NO5)]

Deg. of freedom 54

Full point group C1 NOp 1

Largest Abelian subgroup C1 NOp 1

Largest concise Abelian subgroup C1 NOp 1

Standard orientation:

| Center<br>Number | Atomic<br>Number | Atomic<br>Type | Coordinates (Angstroms) |           |           |
|------------------|------------------|----------------|-------------------------|-----------|-----------|
|                  |                  |                | X                       | Y         | Z         |
| 1                | 6                | 0              | 1.042199                | 1.211853  | -0.086639 |
| 2                | 6                | 0              | -0.327398               | 1.213290  | -0.086555 |
| 3                | 6                | 0              | -1.076321               | -0.000006 | 0.000033  |
| 4                | 6                | 0              | -0.327392               | -1.213300 | 0.086604  |
| 5                | 6                | 0              | 1.042205                | -1.211859 | 0.086658  |
| 6                | 6                | 0              | 1.740065                | -0.000002 | 0.000001  |
| 7                | 1                | 0              | 1.595558                | 2.138485  | -0.153612 |
| 8                | 1                | 0              | -0.873546               | 2.146392  | -0.153700 |
| 9                | 1                | 0              | -0.873535               | -2.146404 | 0.153761  |
| 10               | 1                | 0              | 1.595568                | -2.138489 | 0.153617  |
| 11               | 8                | 0              | -2.357634               | -0.000009 | 0.000049  |
| 12               | 8                | 0              | -3.880908               | -2.207964 | -0.039455 |
| 13               | 1                | 0              | -4.387198               | -2.158815 | -0.854627 |
| 14               | 1                | 0              | -3.300244               | -1.407304 | -0.038281 |
| 15               | 8                | 0              | -3.880907               | 2.207950  | 0.039359  |
| 16               | 1                | 0              | -3.300236               | 1.407295  | 0.038260  |
| 17               | 1                | 0              | -4.386844               | 2.159128  | 0.854769  |
| 18               | 7                | 0              | 3.162258                | 0.000001  | -0.000014 |
| 19               | 8                | 0              | 3.761880                | 1.074001  | -0.078747 |
| 20               | 8                | 0              | 3.761885                | -1.073998 | 0.078705  |

Rotational constants (GHZ):      1.6987616      0.3855470

#### 4-nitrothymol

Electronic Energy -822.006861

Stoichiometry C10H17NO5

Framework group C1[X(C10H17NO5)]

Deg. of freedom 93

Full point group C1 NOp 1

Largest Abelian subgroup C1 NOp 1

Largest concise Abelian subgroup C1 NOp 1

Standard orientation:

| Center<br>Number | Atomic<br>Number | Atomic<br>Type | Coordinates (Angstroms) |           |           |
|------------------|------------------|----------------|-------------------------|-----------|-----------|
|                  |                  |                | X                       | Y         | Z         |
| 1                | 6                | 0              | -1.196078               | 0.970338  | -0.077155 |
| 2                | 6                | 0              | 0.174029                | 0.930770  | -0.220839 |
| 3                | 6                | 0              | 0.770524                | -0.342051 | -0.244527 |
| 4                | 6                | 0              | 0.003725                | -1.498623 | -0.130043 |
| 5                | 6                | 0              | -1.378456               | -1.467962 | 0.001512  |
| 6                | 6                | 0              | -1.959029               | -0.193012 | 0.025332  |
| 7                | 1                | 0              | -1.713959               | 1.917540  | -0.053847 |
| 8                | 1                | 0              | 0.507945                | -2.458035 | -0.140396 |
| 9                | 8                | 0              | 2.106270                | -0.408944 | -0.384815 |
| 10               | 1                | 0              | 2.439190                | -1.338998 | -0.392839 |
| 11               | 8                | 0              | 3.510106                | -2.653708 | -0.172860 |
| 12               | 1                | 0              | 3.797132                | -3.199347 | -0.912049 |
| 13               | 1                | 0              | 4.263393                | -2.080280 | 0.067806  |
| 14               | 8                | 0              | 4.915800                | -0.379753 | 0.414522  |
| 15               | 1                | 0              | 4.098410                | 0.132438  | 0.345718  |
| 16               | 1                | 0              | 5.344841                | -0.092131 | 1.226884  |
| 17               | 7                | 0              | -3.393743               | -0.011599 | 0.158846  |
| 18               | 8                | 0              | -3.812590               | 1.080659  | 0.521068  |
| 19               | 8                | 0              | -4.135090               | -0.948019 | -0.101480 |
| 20               | 6                | 0              | 1.033806                | 2.174539  | -0.318880 |
| 21               | 1                | 0              | 1.854380                | 1.934604  | -0.999978 |
| 22               | 6                | 0              | 1.648604                | 2.508154  | 1.047350  |
| 23               | 1                | 0              | 2.198402                | 1.659412  | 1.457759  |
| 24               | 1                | 0              | 2.338211                | 3.351146  | 0.961117  |
| 25               | 1                | 0              | 0.866964                | 2.781224  | 1.761456  |
| 26               | 6                | 0              | 0.294681                | 3.384442  | -0.886830 |
| 27               | 1                | 0              | -0.168627               | 3.158760  | -1.849709 |
| 28               | 1                | 0              | -0.484536               | 3.740269  | -0.208059 |
| 29               | 1                | 0              | 0.995785                | 4.208383  | -1.034049 |
| 30               | 6                | 0              | -2.115483               | -2.771821 | 0.131060  |
| 31               | 1                | 0              | -2.800468               | -2.766979 | 0.978947  |



|    |   |   |           |           |           |
|----|---|---|-----------|-----------|-----------|
| 32 | 1 | 0 | -2.714874 | -2.974640 | -0.756747 |
| 33 | 1 | 0 | -1.399887 | -3.582688 | 0.262711  |

---

Rotational constants (GHZ):      0.6612248      0.2995492      0.2153042

#### 4-nitrothymolate

Electronic Energy -821.549751  
 Stoichiometry C10H16NO5(1-)  
 Framework group C1[X(C10H16NO5)]  
 Deg. of freedom 90  
 Full point group C1 NOp 1  
 Largest Abelian subgroup C1 NOp 1  
 Largest concise Abelian subgroup C1 NOp 1  
 Standard orientation:

| Center<br>Number | Atomic<br>Number | Atomic<br>Type | Coordinates (Angstroms) |           |           |
|------------------|------------------|----------------|-------------------------|-----------|-----------|
|                  |                  |                | X                       | Y         | Z         |
| 1                | 6                | 0              | -1.088155               | 0.974404  | -0.080034 |
| 2                | 6                | 0              | 0.270244                | 0.825059  | -0.108675 |
| 3                | 6                | 0              | 0.811962                | -0.508651 | -0.076357 |
| 4                | 6                | 0              | -0.110591               | -1.590356 | -0.013019 |
| 5                | 6                | 0              | -1.479629               | -1.445079 | 0.022422  |
| 6                | 6                | 0              | -1.976120               | -0.118230 | -0.012058 |
| 7                | 1                | 0              | -1.526341               | 1.960976  | -0.110629 |
| 8                | 1                | 0              | 0.312334                | -2.588671 | 0.006083  |
| 9                | 8                | 0              | 2.071487                | -0.719355 | -0.108448 |
| 10               | 8                | 0              | 3.775688                | -2.763307 | -0.179252 |
| 11               | 1                | 0              | 3.694592                | -3.357460 | 0.571810  |
| 12               | 1                | 0              | 3.012463                | -2.136619 | -0.119912 |
| 13               | 8                | 0              | 4.694794                | 0.022887  | -0.135720 |
| 14               | 1                | 0              | 3.717430                | 0.040857  | -0.120894 |
| 15               | 1                | 0              | 4.866753                | -0.928943 | -0.128069 |
| 16               | 7                | 0              | -3.362971               | 0.182324  | 0.012156  |
| 17               | 8                | 0              | -3.727929               | 1.363505  | -0.051781 |
| 18               | 8                | 0              | -4.188664               | -0.731216 | 0.098345  |
| 19               | 6                | 0              | 1.229414                | 1.995549  | -0.150134 |
| 20               | 1                | 0              | 2.053104                | 1.695559  | -0.805290 |
| 21               | 6                | 0              | 1.824823                | 2.257237  | 1.240289  |
| 22               | 1                | 0              | 2.280864                | 1.355203  | 1.650479  |
| 23               | 1                | 0              | 2.591021                | 3.035783  | 1.193732  |
| 24               | 1                | 0              | 1.045278                | 2.591362  | 1.931083  |
| 25               | 6                | 0              | 0.623643                | 3.276390  | -0.720074 |
| 26               | 1                | 0              | 0.186278                | 3.111747  | -1.707484 |
| 27               | 1                | 0              | -0.155024               | 3.681836  | -0.068321 |
| 28               | 1                | 0              | 1.396014                | 4.042855  | -0.816091 |
| 29               | 6                | 0              | -2.323928               | -2.688831 | 0.087602  |
| 30               | 1                | 0              | -2.942413               | -2.706260 | 0.985289  |
| 31               | 1                | 0              | -3.008073               | -2.753780 | -0.758873 |
| 32               | 1                | 0              | -1.676463               | -3.565784 | 0.087067  |

Rotational constants (GHZ):      0.6940206      0.3012712      0.2174272

### - 2H<sub>2</sub>O/CAM-B3LYP 6-311G+dp/CPCM

#### H<sub>2</sub>O

Electronic Energy -229.330057  
 Stoichiometry H6O3  
 Framework group C1[X(H6O3)]  
 Deg. of freedom 21  
 Full point group C1 NOp 1  
 Largest Abelian subgroup C1 NOp 1  
 Largest concise Abelian subgroup C1 NOp 1  
 Standard orientation:

| Center<br>Number | Atomic<br>Number | Atomic<br>Type | Coordinates (Angstroms) |          |           |
|------------------|------------------|----------------|-------------------------|----------|-----------|
|                  |                  |                | X                       | Y        | Z         |
| 1                | 8                | 0              | 0.000027                | 0.771636 | -0.000040 |
| 2                | 1                | 0              | 0.000772                | 1.353128 | 0.768172  |

|   |   |   |           |           |           |
|---|---|---|-----------|-----------|-----------|
| 3 | 1 | 0 | -0.001205 | 1.353830  | -0.767718 |
| 4 | 8 | 0 | -2.657232 | -0.369073 | -0.000223 |
| 5 | 1 | 0 | -2.720716 | -1.326416 | 0.001483  |
| 6 | 1 | 0 | -1.713112 | -0.161121 | 0.000730  |
| 7 | 8 | 0 | 2.657268  | -0.369069 | 0.000209  |
| 8 | 1 | 0 | 2.720574  | -1.326425 | -0.001593 |
| 9 | 1 | 0 | 1.713184  | -0.160946 | -0.000632 |

Rotational constants (GHZ):      22.6022816      2.0386116      1.8865469

#### OH<sup>-</sup>

Electronic Energy -152.393735

Stoichiometry H3O2(1-)

Framework group C1[X(H3O2)]

Deg. of freedom 9

Full point group C1 NOp 1

Largest Abelian subgroup C1 NOp 1

Largest concise Abelian subgroup C1 NOp 1

Standard orientation:

| Center<br>Number | Atomic<br>Number | Atomic<br>Type | Coordinates (Angstroms) |           |           |
|------------------|------------------|----------------|-------------------------|-----------|-----------|
|                  |                  |                | X                       | Y         | Z         |
| 1                | 8                | 0              | 1.248218                | 0.055511  | -0.095601 |
| 2                | 1                | 0              | 1.684853                | -0.281910 | 0.690602  |
| 3                | 8                | 0              | -1.239815               | -0.107854 | -0.024696 |
| 4                | 1                | 0              | -1.567990               | 0.737123  | 0.291814  |
| 5                | 1                | 0              | -0.184086               | -0.036471 | -0.020040 |

Rotational constants (GHZ):      337.1039073      9.0856433      9.0651418

#### Phenol

Electronic Energy -460.298289

Stoichiometry C6H10O3

Framework group C1[X(C6H10O3)]

Deg. of freedom 51

Full point group C1 NOp 1

Largest Abelian subgroup C1 NOp 1

Largest concise Abelian subgroup C1 NOp 1

Standard orientation:

| Center<br>Number | Atomic<br>Number | Atomic<br>Type | Coordinates (Angstroms) |           |           |
|------------------|------------------|----------------|-------------------------|-----------|-----------|
|                  |                  |                | X                       | Y         | Z         |
| 1                | 6                | 0              | 2.579260                | -1.016676 | -0.040705 |
| 2                | 6                | 0              | 1.253485                | -1.237462 | -0.379970 |
| 3                | 6                | 0              | 0.346478                | -0.185920 | -0.328551 |
| 4                | 6                | 0              | 0.765128                | 1.081408  | 0.061626  |
| 5                | 6                | 0              | 2.096200                | 1.289930  | 0.395107  |
| 6                | 6                | 0              | 3.009913                | 0.246168  | 0.347385  |
| 7                | 1                | 0              | 3.283009                | -1.839665 | -0.083224 |
| 8                | 1                | 0              | 0.907538                | -2.215265 | -0.691722 |
| 9                | 1                | 0              | 0.046779                | 1.892161  | 0.109070  |
| 10               | 1                | 0              | 2.417832                | 2.279297  | 0.698418  |
| 11               | 1                | 0              | 4.046814                | 0.414137  | 0.609927  |
| 12               | 8                | 0              | -0.950101               | -0.442795 | -0.665179 |
| 13               | 1                | 0              | -1.485870               | 0.376792  | -0.670092 |
| 14               | 8                | 0              | -2.896718               | 1.394032  | -0.243515 |
| 15               | 1                | 0              | -3.524160               | 1.828118  | -0.825832 |
| 16               | 1                | 0              | -3.367944               | 0.667279  | 0.203110  |
| 17               | 8                | 0              | -3.222605               | -1.107456 | 0.798023  |
| 18               | 1                | 0              | -2.363787               | -1.283333 | 0.378914  |
| 19               | 1                | 0              | -3.707608               | -1.934460 | 0.827446  |

Rotational constants (GHZ):      2.8958025      0.7313665      0.6242864

#### Phenolate

Electronic Energy -459.832127

Stoichiometry C6H9O3(1-)

Framework group C1[X(C6H9O3)]

Deg. of freedom 48

Full point group C1 NOP 1  
 Largest Abelian subgroup C1 NOP 1  
 Largest concise Abelian subgroup C1 NOP 1  
 Standard orientation:

| Center<br>Number | Atomic<br>Number | Atomic<br>Type | Coordinates (Angstroms) |           |           |
|------------------|------------------|----------------|-------------------------|-----------|-----------|
|                  |                  |                | X                       | Y         | Z         |
| 1                | 6                | 0              | 2.239783                | -1.191366 | 0.089534  |
| 2                | 6                | 0              | 0.855874                | -1.200725 | 0.090661  |
| 3                | 6                | 0              | 0.103276                | -0.000014 | 0.000051  |
| 4                | 6                | 0              | 0.855928                | 1.200660  | -0.090622 |
| 5                | 6                | 0              | 2.239837                | 1.191230  | -0.089575 |
| 6                | 6                | 0              | 2.957691                | -0.000086 | -0.000040 |
| 7                | 1                | 0              | 2.773761                | -2.135488 | 0.160346  |
| 8                | 1                | 0              | 0.307361                | -2.134174 | 0.159615  |
| 9                | 1                | 0              | 0.307455                | 2.134133  | -0.159578 |
| 10               | 1                | 0              | 2.773857                | 2.135324  | -0.160435 |
| 11               | 1                | 0              | 4.041828                | -0.000113 | -0.000074 |
| 12               | 8                | 0              | -1.191149               | 0.000017  | 0.000105  |
| 13               | 8                | 0              | -2.824764               | 2.092553  | 0.032464  |
| 14               | 1                | 0              | -3.337591               | 1.846389  | 0.804705  |
| 15               | 1                | 0              | -2.156604               | 1.355543  | -0.039445 |
| 16               | 8                | 0              | -2.825152               | -2.092399 | -0.032578 |
| 17               | 1                | 0              | -2.156952               | -1.355406 | 0.038921  |
| 18               | 1                | 0              | -3.338927               | -1.845773 | -0.804040 |

Rotational constants (GHZ): 2.1100979 0.8611089 0.6142565

### Thymol

Electronic Energy -617.499726

Stoichiometry C10H18O3

Framework group C1[X(C10H18O3)]

Deg. of freedom 87

Full point group C1 NOP 1

Largest Abelian subgroup C1 NOP 1

Largest concise Abelian subgroup C1 NOP 1

Standard orientation:

| Center<br>Number | Atomic<br>Number | Atomic<br>Type | Coordinates (Angstroms) |           |           |
|------------------|------------------|----------------|-------------------------|-----------|-----------|
|                  |                  |                | X                       | Y         | Z         |
| 1                | 6                | 0              | -0.158235               | 2.186971  | -0.296881 |
| 2                | 1                | 0              | -0.954110               | 1.966721  | -1.013079 |
| 3                | 6                | 0              | 0.659901                | 0.918621  | -0.151881 |
| 4                | 6                | 0              | 2.022711                | 0.916996  | 0.116129  |
| 5                | 6                | 0              | 0.035212                | -0.329051 | -0.256104 |
| 6                | 6                | 0              | 2.743388                | -0.261066 | 0.272971  |
| 7                | 1                | 0              | 2.546027                | 1.861523  | 0.201744  |
| 8                | 6                | 0              | 0.746618                | -1.510650 | -0.102352 |
| 9                | 6                | 0              | 2.112986                | -1.493599 | 0.161881  |
| 10               | 1                | 0              | 3.806330                | -0.216292 | 0.481160  |
| 11               | 1                | 0              | 0.218718                | -2.455973 | -0.185447 |
| 12               | 6                | 0              | 0.638913                | 3.371957  | -0.840523 |
| 13               | 1                | 0              | -0.028266               | 4.215831  | -1.030955 |
| 14               | 1                | 0              | 1.396041                | 3.713844  | -0.130238 |
| 15               | 1                | 0              | 1.141948                | 3.120420  | -1.776404 |
| 16               | 6                | 0              | -0.824424               | 2.555201  | 1.035730  |
| 17               | 1                | 0              | -1.485725               | 3.417699  | 0.917184  |
| 18               | 1                | 0              | -1.413819               | 1.724340  | 1.428764  |
| 19               | 1                | 0              | -0.069398               | 2.806814  | 1.785497  |
| 20               | 6                | 0              | 2.877844                | -2.782596 | 0.301248  |
| 21               | 1                | 0              | 2.335678                | -3.501958 | 0.918543  |
| 22               | 1                | 0              | 3.042434                | -3.247875 | -0.674687 |
| 23               | 1                | 0              | 3.854635                | -2.614253 | 0.756614  |
| 24               | 8                | 0              | -1.307457               | -0.353020 | -0.514643 |
| 25               | 1                | 0              | -1.628633               | -1.267484 | -0.650891 |
| 26               | 8                | 0              | -3.855804               | -0.307367 | 0.617610  |
| 27               | 1                | 0              | -2.982706               | 0.057343  | 0.395515  |
| 28               | 1                | 0              | -4.086027               | 0.019953  | 1.490038  |
| 29               | 8                | 0              | -2.840471               | -2.590422 | -0.492679 |
| 30               | 1                | 0              | -3.317975               | -3.019810 | -1.206359 |

|    |   |   |           |           |           |
|----|---|---|-----------|-----------|-----------|
| 31 | 1 | 0 | -3.474773 | -2.011088 | -0.030611 |
|----|---|---|-----------|-----------|-----------|

---

Rotational constants (GHZ):      0.6896704      0.5733312      0.3373845

#### Thymolate

Electronic Energy -617.030020  
 Stoichiometry C10H17O3(1-)  
 Framework group C1[X(C10H17O3)]  
 Deg. of freedom 84  
 Full point group C1 NOp 1  
 Largest Abelian subgroup C1 NOp 1  
 Largest concise Abelian subgroup C1 NOp 1  
 Standard orientation:

| Center<br>Number | Atomic<br>Number | Atomic<br>Type | Coordinates (Angstroms) |           |           |
|------------------|------------------|----------------|-------------------------|-----------|-----------|
|                  |                  |                | X                       | Y         | Z         |
| 1                | 6                | 0              | 0.862433                | 1.904108  | -0.159855 |
| 2                | 1                | 0              | 1.602774                | 1.399736  | -0.789027 |
| 3                | 6                | 0              | -0.339018               | 0.984134  | -0.102912 |
| 4                | 6                | 0              | -1.645907               | 1.437860  | -0.126542 |
| 5                | 6                | 0              | -0.089182               | -0.422321 | 0.007852  |
| 6                | 6                | 0              | -2.741878               | 0.576563  | -0.045521 |
| 7                | 1                | 0              | -1.835727               | 2.503481  | -0.212284 |
| 8                | 6                | 0              | -1.219973               | -1.270677 | 0.086089  |
| 9                | 6                | 0              | -2.522922               | -0.793665 | 0.060583  |
| 10               | 1                | 0              | -3.752210               | 0.972521  | -0.065383 |
| 11               | 1                | 0              | -1.031815               | -2.336753 | 0.179402  |
| 12               | 6                | 0              | 1.495593                | 2.060354  | 1.229205  |
| 13               | 1                | 0              | 2.421198                | 2.643685  | 1.178046  |
| 14               | 1                | 0              | 0.804027                | 2.571649  | 1.907392  |
| 15               | 1                | 0              | 1.732330                | 1.081647  | 1.646784  |
| 16               | 6                | 0              | 0.578715                | 3.274348  | -0.773460 |
| 17               | 1                | 0              | 1.509196                | 3.840301  | -0.878333 |
| 18               | 1                | 0              | 0.121468                | 3.184532  | -1.762275 |
| 19               | 1                | 0              | -0.093354               | 3.868385  | -0.145988 |
| 20               | 6                | 0              | -3.683726               | -1.756595 | 0.119084  |
| 21               | 1                | 0              | -3.845731               | -2.242323 | -0.848921 |
| 22               | 1                | 0              | -3.507232               | -2.547560 | 0.852647  |
| 23               | 1                | 0              | -4.609972               | -1.243627 | 0.389883  |
| 24               | 8                | 0              | 1.116022                | -0.889059 | 0.033874  |
| 25               | 8                | 0              | 2.044314                | -3.334390 | -0.139312 |
| 26               | 1                | 0              | 1.852010                | -3.564171 | -1.050608 |
| 27               | 1                | 0              | 1.587865                | -2.449875 | -0.013080 |
| 28               | 8                | 0              | 3.865582                | -0.921312 | -0.140614 |
| 29               | 1                | 0              | 2.940080                | -0.611510 | -0.090940 |
| 30               | 1                | 0              | 3.732937                | -1.876693 | -0.096032 |

Rotational constants (GHZ):      0.7430395      0.5610521      0.3376507

#### Carvacrol

Electronic Energy -617.500272  
 Stoichiometry C10H18O3  
 Framework group C1[X(C10H18O3)]  
 Deg. of freedom 87  
 Full point group C1 NOp 1  
 Largest Abelian subgroup C1 NOp 1  
 Largest concise Abelian subgroup C1 NOp 1  
 Standard orientation:

| Center<br>Number | Atomic<br>Number | Atomic<br>Type | Coordinates (Angstroms) |           |           |
|------------------|------------------|----------------|-------------------------|-----------|-----------|
|                  |                  |                | X                       | Y         | Z         |
| 1                | 6                | 0              | -0.591979               | 1.517782  | 0.024320  |
| 2                | 6                | 0              | -0.663210               | 0.146155  | -0.223540 |
| 3                | 6                | 0              | 0.483106                | -0.641015 | -0.252171 |
| 4                | 6                | 0              | 1.739986                | -0.091885 | -0.030927 |
| 5                | 6                | 0              | 1.821796                | 1.277491  | 0.222554  |
| 6                | 6                | 0              | 0.673987                | 2.055637  | 0.247374  |
| 7                | 1                | 0              | 2.783082                | 1.744620  | 0.401518  |
| 8                | 8                | 0              | -1.849588               | -0.487381 | -0.465683 |
| 9                | 1                | 0              | -2.639644               | 0.067751  | -0.309808 |

|    |   |   |           |           |           |
|----|---|---|-----------|-----------|-----------|
| 10 | 8 | 0 | -3.587989 | -2.533687 | 0.317161  |
| 11 | 1 | 0 | -3.753565 | -3.304974 | -0.233593 |
| 12 | 1 | 0 | -2.751428 | -2.149084 | 0.007030  |
| 13 | 8 | 0 | -4.436774 | 0.085013  | 0.118619  |
| 14 | 1 | 0 | -4.485696 | -0.887908 | 0.172467  |
| 15 | 1 | 0 | -5.125672 | 0.363353  | -0.492517 |
| 16 | 1 | 0 | 0.756413  | 3.119445  | 0.443631  |
| 17 | 1 | 0 | 0.373592  | -1.701589 | -0.451144 |
| 18 | 6 | 0 | -1.827916 | 2.375284  | 0.039543  |
| 19 | 1 | 0 | -2.337819 | 2.364220  | -0.928509 |
| 20 | 1 | 0 | -2.551061 | 2.038854  | 0.787084  |
| 21 | 1 | 0 | -1.571234 | 3.409788  | 0.266282  |
| 22 | 6 | 0 | 2.976998  | -0.969025 | -0.066023 |
| 23 | 1 | 0 | 2.640018  | -1.987800 | -0.279959 |
| 24 | 6 | 0 | 3.935958  | -0.552651 | -1.185870 |
| 25 | 1 | 0 | 4.788952  | -1.234209 | -1.231643 |
| 26 | 1 | 0 | 3.438368  | -0.565004 | -2.158019 |
| 27 | 1 | 0 | 4.323336  | 0.455601  | -1.018299 |
| 28 | 6 | 0 | 3.695011  | -0.992365 | 1.287060  |
| 29 | 1 | 0 | 3.024768  | -1.318776 | 2.085213  |
| 30 | 1 | 0 | 4.546117  | -1.677090 | 1.256215  |
| 31 | 1 | 0 | 4.073861  | -0.001220 | 1.549346  |

-----

Rotational constants (GHZ):            1.1703831            0.3521736            0.2903455

**Carvacrolate**

Electronic Energy -617.031943

Stoichiometry C10H17O3(1-)

Framework group C1[X(C10H17O3)]

Deg. of freedom 84

Full point group C1 NOp 1

Largest Abelian subgroup C1 NOp 1

Largest concise Abelian subgroup C1 NOp 1

Standard orientation:

| Center<br>Number | Atomic<br>Number | Atomic<br>Type | Coordinates (Angstroms) |           |           |
|------------------|------------------|----------------|-------------------------|-----------|-----------|
|                  |                  |                | X                       | Y         | Z         |
| 1                | 6                | 0              | -0.725771               | 1.583241  | -0.105543 |
| 2                | 6                | 0              | -0.842803               | 0.185257  | -0.322100 |
| 3                | 6                | 0              | 0.340987                | -0.583492 | -0.270756 |
| 4                | 6                | 0              | 1.591726                | -0.031685 | -0.018227 |
| 5                | 6                | 0              | 1.682670                | 1.344569  | 0.193109  |
| 6                | 6                | 0              | 0.529138                | 2.123059  | 0.145085  |
| 7                | 1                | 0              | 2.639773                | 1.813042  | 0.392300  |
| 8                | 8                | 0              | -2.004727               | -0.370043 | -0.570422 |
| 9                | 8                | 0              | -4.263744               | -0.374236 | 0.778912  |
| 10               | 1                | 0              | -4.895321               | 0.260337  | 0.430535  |
| 11               | 1                | 0              | -3.416660               | -0.225313 | 0.276293  |
| 12               | 8                | 0              | -2.816938               | -2.867050 | -0.220166 |
| 13               | 1                | 0              | -2.375495               | -1.995257 | -0.403881 |
| 14               | 1                | 0              | -3.636594               | -2.591778 | 0.205735  |
| 15               | 1                | 0              | 0.251260                | -1.653082 | -0.440265 |
| 16               | 1                | 0              | 0.609334                | 3.194616  | 0.307886  |
| 17               | 6                | 0              | -1.955420               | 2.446157  | -0.160587 |
| 18               | 1                | 0              | -2.460044               | 2.361529  | -1.127663 |
| 19               | 1                | 0              | -2.688642               | 2.154189  | 0.596616  |
| 20               | 1                | 0              | -1.703016               | 3.496061  | 0.000479  |
| 21               | 6                | 0              | 2.822782                | -0.920305 | 0.021936  |
| 22               | 1                | 0              | 2.483601                | -1.943480 | -0.168744 |
| 23               | 6                | 0              | 3.495524                | -0.905853 | 1.398302  |
| 24               | 1                | 0              | 2.794433                | -1.196986 | 2.183827  |
| 25               | 1                | 0              | 4.340035                | -1.599808 | 1.422305  |
| 26               | 1                | 0              | 3.875432                | 0.090293  | 1.639574  |
| 27               | 6                | 0              | 3.828359                | -0.555324 | -1.074897 |
| 28               | 1                | 0              | 4.675250                | -1.246760 | -1.067750 |
| 29               | 1                | 0              | 3.366040                | -0.595010 | -2.063853 |
| 30               | 1                | 0              | 4.220725                | 0.454300  | -0.927918 |

-----

Rotational constants (GHZ):            1.0618176            0.3938853            0.3139844

**2,3-dimethylphenol**

Electronic Energy -538.900113

Stoichiometry C<sub>8</sub>H<sub>14</sub>O<sub>3</sub>Framework group C1[X(C<sub>8</sub>H<sub>14</sub>O<sub>3</sub>)]

Deg. of freedom 69

Full point group C1 NOp 1

Largest Abelian subgroup C1 NOp 1

Largest concise Abelian subgroup C1 NOp 1

Standard orientation:

| Center<br>Number | Atomic<br>Number | Atomic<br>Type | Coordinates (Angstroms) |           |           |
|------------------|------------------|----------------|-------------------------|-----------|-----------|
|                  |                  |                | X                       | Y         | Z         |
| 1                | 6                | 0              | 0.828924                | 0.559614  | -0.086449 |
| 2                | 6                | 0              | -0.023217               | -0.541199 | -0.219368 |
| 3                | 6                | 0              | 0.455558                | -1.844796 | -0.179673 |
| 4                | 6                | 0              | 1.810189                | -2.064117 | 0.000310  |
| 5                | 6                | 0              | 2.674719                | -0.987081 | 0.138756  |
| 6                | 6                | 0              | 2.199723                | 0.322804  | 0.096880  |
| 7                | 1                | 0              | 2.192958                | -3.077307 | 0.033679  |
| 8                | 1                | 0              | 3.734910                | -1.161463 | 0.280514  |
| 9                | 8                | 0              | -1.367754               | -0.391449 | -0.413541 |
| 10               | 1                | 0              | -1.694121               | 0.523529  | -0.307047 |
| 11               | 8                | 0              | -3.935569               | -1.061377 | 0.462042  |
| 12               | 1                | 0              | -4.514793               | -1.636808 | -0.046942 |
| 13               | 1                | 0              | -3.033313               | -1.226284 | 0.141311  |
| 14               | 8                | 0              | -3.180007               | 1.568372  | 0.096303  |
| 15               | 1                | 0              | -3.760904               | 0.792436  | 0.207193  |
| 16               | 1                | 0              | -3.613779               | 2.150694  | -0.534768 |
| 17               | 1                | 0              | -0.242506               | -2.665785 | -0.289345 |
| 18               | 6                | 0              | 0.249994                | 1.948711  | -0.156677 |
| 19               | 1                | 0              | -0.194355               | 2.143378  | -1.137875 |
| 20               | 1                | 0              | -0.538057               | 2.095970  | 0.586550  |
| 21               | 1                | 0              | 1.005027                | 2.711223  | 0.015019  |
| 22               | 6                | 0              | 3.175099                | 1.463090  | 0.245823  |
| 23               | 1                | 0              | 3.169864                | 2.116374  | -0.630031 |
| 24               | 1                | 0              | 2.941010                | 2.084560  | 1.113618  |
| 25               | 1                | 0              | 4.188763                | 1.082968  | 0.372088  |

|                             |           |           |           |
|-----------------------------|-----------|-----------|-----------|
| Rotational constants (GHZ): | 1.6299101 | 0.5710850 | 0.4321183 |
|-----------------------------|-----------|-----------|-----------|

**2,3-dimethylphenolate**

Electronic Energy -538.432082

Stoichiometry C<sub>8</sub>H<sub>13</sub>O<sub>3</sub>(1-)Framework group C1[X(C<sub>8</sub>H<sub>13</sub>O<sub>3</sub>)]

Deg. of freedom 66

Full point group C1 NOp 1

Largest Abelian subgroup C1 NOp 1

Largest concise Abelian subgroup C1 NOp 1

Standard orientation:

| Center<br>Number | Atomic<br>Number | Atomic<br>Type | Coordinates (Angstroms) |           |           |
|------------------|------------------|----------------|-------------------------|-----------|-----------|
|                  |                  |                | X                       | Y         | Z         |
| 1                | 6                | 0              | -0.119726               | 1.737411  | 0.138363  |
| 2                | 6                | 0              | 0.215543                | 0.374584  | 0.291781  |
| 3                | 6                | 0              | -0.830866               | -0.583561 | 0.184358  |
| 4                | 6                | 0              | -2.138579               | -0.172101 | -0.090506 |
| 5                | 6                | 0              | -2.431710               | 1.185632  | -0.246642 |
| 6                | 6                | 0              | -1.420170               | 2.130991  | -0.127238 |
| 7                | 1                | 0              | 0.673186                | 2.472741  | 0.228153  |
| 8                | 1                | 0              | -3.448670               | 1.494692  | -0.461212 |
| 9                | 8                | 0              | 1.451246                | 0.005231  | 0.529683  |
| 10               | 8                | 0              | 3.661471                | 1.197171  | -0.202264 |
| 11               | 1                | 0              | 4.037919                | 1.712138  | 0.516091  |
| 12               | 1                | 0              | 2.775402                | 0.865842  | 0.125413  |
| 13               | 8                | 0              | 3.133687                | -1.765610 | -0.517362 |
| 14               | 1                | 0              | 2.377372                | -1.255839 | -0.132009 |
| 15               | 1                | 0              | 3.801505                | -1.076806 | -0.617600 |
| 16               | 1                | 0              | -1.649113               | 3.185416  | -0.245721 |
| 17               | 6                | 0              | -0.482373               | -2.037999 | 0.360555  |
| 18               | 1                | 0              | -0.174393               | -2.500672 | -0.584454 |

|    |   |   |           |           |           |
|----|---|---|-----------|-----------|-----------|
| 19 | 1 | 0 | 0.355143  | -2.144595 | 1.050594  |
| 20 | 1 | 0 | -1.322517 | -2.618070 | 0.743563  |
| 21 | 6 | 0 | -3.251992 | -1.182060 | -0.228963 |
| 22 | 1 | 0 | -3.026783 | -1.930698 | -0.993033 |
| 23 | 1 | 0 | -3.425117 | -1.724914 | 0.704675  |
| 24 | 1 | 0 | -4.185923 | -0.690961 | -0.505169 |

Rotational constants (GHZ):      1.5696057      0.6212491      0.4605379

#### 2,4-dimethylphenol

Electronic Energy -538.901371

Stoichiometry C<sub>8</sub>H<sub>14</sub>O<sub>3</sub>

Framework group C1[X(C<sub>8</sub>H<sub>14</sub>O<sub>3</sub>)]

Deg. of freedom 69

Full point group C1 NOp 1

Largest Abelian subgroup C1 NOp 1

Largest concise Abelian subgroup C1 NOp 1

Standard orientation:

| Center<br>Number | Atomic<br>Number | Atomic<br>Type | Coordinates (Angstroms) |           |           |
|------------------|------------------|----------------|-------------------------|-----------|-----------|
|                  |                  |                | X                       | Y         | Z         |
| 1                | 6                | 0              | 0.534371                | 0.948985  | -0.086103 |
| 2                | 6                | 0              | -0.087732               | -0.287731 | -0.274805 |
| 3                | 6                | 0              | 0.657996                | -1.458155 | -0.288465 |
| 4                | 6                | 0              | 2.032267                | -1.412458 | -0.105779 |
| 5                | 6                | 0              | 2.686450                | -0.200481 | 0.097294  |
| 6                | 6                | 0              | 1.914826                | 0.959030  | 0.098886  |
| 7                | 1                | 0              | 2.600745                | -2.336005 | -0.121968 |
| 8                | 8                | 0              | -1.435921               | -0.402876 | -0.478576 |
| 9                | 1                | 0              | -1.937907               | 0.417481  | -0.302066 |
| 10               | 8                | 0              | -3.779820               | -1.594613 | 0.469676  |
| 11               | 1                | 0              | -4.264906               | -2.245125 | -0.047236 |
| 12               | 1                | 0              | -2.880701               | -1.566189 | 0.101903  |
| 13               | 8                | 0              | -3.554970               | 1.145346  | 0.219248  |
| 14               | 1                | 0              | -3.975176               | 0.269858  | 0.312782  |
| 15               | 1                | 0              | -4.119259               | 1.661995  | -0.364014 |
| 16               | 1                | 0              | 2.404279                | 1.917138  | 0.244737  |
| 17               | 1                | 0              | 0.148693                | -2.401598 | -0.446067 |
| 18               | 6                | 0              | -0.260436               | 2.226374  | -0.098062 |
| 19               | 1                | 0              | -0.760551               | 2.377955  | -1.059339 |
| 20               | 1                | 0              | -1.036077               | 2.232424  | 0.672057  |
| 21               | 1                | 0              | 0.390009                | 3.082910  | 0.076422  |
| 22               | 6                | 0              | 4.173358                | -0.143416 | 0.332515  |
| 23               | 1                | 0              | 4.601106                | 0.783762  | -0.052838 |
| 24               | 1                | 0              | 4.406257                | -0.191280 | 1.400314  |
| 25               | 1                | 0              | 4.682575                | -0.979067 | -0.150365 |

Rotational constants (GHZ):      1.9426732      0.4958120      0.4050856

#### 2,4-dimethylphenolate

Electronic Energy -538.432738

Stoichiometry C<sub>8</sub>H<sub>13</sub>O<sub>3</sub>(1-)

Framework group C1[X(C<sub>8</sub>H<sub>13</sub>O<sub>3</sub>)]

Deg. of freedom 66

Full point group C1 NOp 1

Largest Abelian subgroup C1 NOp 1

Largest concise Abelian subgroup C1 NOp 1

Standard orientation:

| Center<br>Number | Atomic<br>Number | Atomic<br>Type | Coordinates (Angstroms) |           |           |
|------------------|------------------|----------------|-------------------------|-----------|-----------|
|                  |                  |                | X                       | Y         | Z         |
| 1                | 6                | 0              | 0.421840                | -1.374726 | 0.215435  |
| 2                | 6                | 0              | -0.264140               | -0.149590 | 0.309207  |
| 3                | 6                | 0              | 0.511523                | 1.034979  | 0.179145  |
| 4                | 6                | 0              | 1.880142                | 0.942538  | -0.032344 |
| 5                | 6                | 0              | 2.556823                | -0.277216 | -0.128589 |
| 6                | 6                | 0              | 1.794956                | -1.432631 | 0.001659  |
| 7                | 1                | 0              | -0.150767               | -2.291166 | 0.318113  |
| 8                | 1                | 0              | 2.449411                | 1.864840  | -0.125976 |
| 9                | 8                | 0              | -1.559621               | -0.091026 | 0.517241  |

|    |   |   |           |           |           |
|----|---|---|-----------|-----------|-----------|
| 10 | 8 | 0 | -3.370308 | -1.849168 | -0.158951 |
| 11 | 1 | 0 | -3.615886 | -2.398933 | 0.589651  |
| 12 | 1 | 0 | -2.606814 | -1.278983 | 0.151301  |
| 13 | 8 | 0 | -3.617154 | 1.128899  | -0.642086 |
| 14 | 1 | 0 | -2.763998 | 0.848961  | -0.224403 |
| 15 | 1 | 0 | -4.087070 | 0.289090  | -0.707712 |
| 16 | 1 | 0 | 2.279980  | -2.402648 | -0.063009 |
| 17 | 6 | 0 | -0.173150 | 2.369319  | 0.280484  |
| 18 | 1 | 0 | -0.929492 | 2.492488  | -0.500074 |
| 19 | 1 | 0 | -0.696188 | 2.476602  | 1.235245  |
| 20 | 1 | 0 | 0.544664  | 3.186573  | 0.189302  |
| 21 | 6 | 0 | 4.044343  | -0.325795 | -0.371821 |
| 22 | 1 | 0 | 4.307830  | 0.068389  | -1.358100 |
| 23 | 1 | 0 | 4.594865  | 0.264763  | 0.365848  |
| 24 | 1 | 0 | 4.416112  | -1.350880 | -0.318872 |

-----

|                             |           |           |           |
|-----------------------------|-----------|-----------|-----------|
| Rotational constants (GHZ): | 1.7768559 | 0.5431962 | 0.4310042 |
|-----------------------------|-----------|-----------|-----------|

**2,6-diisopropylphenol**

Electronic Energy -696.094271

Stoichiometry C12H22O3

Framework group C1[X(C12H22O3)]

Deg. of freedom 105

Full point group C1 NOp 1

Largest Abelian subgroup C1 NOp 1

Largest concise Abelian subgroup C1 NOp 1

Standard orientation:

| Center<br>Number | Atomic<br>Number | Atomic<br>Type | Coordinates (Angstroms) |           |           |
|------------------|------------------|----------------|-------------------------|-----------|-----------|
|                  |                  |                | X                       | Y         | Z         |
| 1                | 6                | 0              | 1.117396                | -1.021888 | -0.079110 |
| 2                | 6                | 0              | -0.059336               | -0.266160 | -0.133653 |
| 3                | 6                | 0              | -1.329336               | -0.855185 | -0.117149 |
| 4                | 6                | 0              | -1.401326               | -2.240179 | -0.035297 |
| 5                | 6                | 0              | -0.253509               | -3.015761 | 0.023384  |
| 6                | 6                | 0              | 0.989566                | -2.405927 | -0.001396 |
| 7                | 1                | 0              | -2.369126               | -2.724927 | -0.026571 |
| 8                | 1                | 0              | -0.328227               | -4.094759 | 0.082251  |
| 9                | 8                | 0              | -0.028055               | 1.102016  | -0.199083 |
| 10               | 1                | 0              | 0.856668                | 1.476925  | -0.359194 |
| 11               | 8                | 0              | -0.845787               | 3.742564  | -0.106490 |
| 12               | 1                | 0              | -1.323768               | 4.110059  | 0.640522  |
| 13               | 1                | 0              | -0.937047               | 2.776469  | -0.053148 |
| 14               | 8                | 0              | 1.790018                | 3.110565  | -0.526348 |
| 15               | 1                | 0              | 0.979678                | 3.636725  | -0.389644 |
| 16               | 1                | 0              | 2.242963                | 3.489411  | -1.283117 |
| 17               | 1                | 0              | 1.879523                | -3.020594 | 0.037492  |
| 18               | 6                | 0              | -2.562322               | 0.028687  | -0.162134 |
| 19               | 1                | 0              | -2.332222               | 0.856323  | -0.839066 |
| 20               | 6                | 0              | -2.850961               | 0.624183  | 1.223221  |
| 21               | 1                | 0              | -1.977828               | 1.140753  | 1.625810  |
| 22               | 1                | 0              | -3.682729               | 1.332694  | 1.176710  |
| 23               | 1                | 0              | -3.121409               | -0.165945 | 1.928736  |
| 24               | 6                | 0              | -3.805197               | -0.671816 | -0.708622 |
| 25               | 1                | 0              | -4.617238               | 0.049475  | -0.825344 |
| 26               | 1                | 0              | -3.615120               | -1.126653 | -1.682882 |
| 27               | 1                | 0              | -4.162477               | -1.452961 | -0.032885 |
| 28               | 6                | 0              | 2.473554                | -0.336215 | -0.057428 |
| 29               | 1                | 0              | 2.429318                | 0.529117  | -0.727970 |
| 30               | 6                | 0              | 2.794371                | 0.187419  | 1.349601  |
| 31               | 1                | 0              | 3.736090                | 0.741235  | 1.350524  |
| 32               | 1                | 0              | 2.015256                | 0.854872  | 1.720588  |
| 33               | 1                | 0              | 2.885139                | -0.647045 | 2.049844  |
| 34               | 6                | 0              | 3.614746                | -1.212547 | -0.573334 |
| 35               | 1                | 0              | 3.393276                | -1.624325 | -1.560020 |
| 36               | 1                | 0              | 4.529934                | -0.621354 | -0.649150 |
| 37               | 1                | 0              | 3.824061                | -2.044314 | 0.103391  |

-----

|                             |           |           |           |
|-----------------------------|-----------|-----------|-----------|
| Rotational constants (GHZ): | 0.5782226 | 0.4700602 | 0.2833303 |
|-----------------------------|-----------|-----------|-----------|



**2,6-diisopropylphenolate**

Electronic Energy -695.625109

Stoichiometry C<sub>12</sub>H<sub>21</sub>O<sub>3</sub>(1-)Framework group C1[X(C<sub>12</sub>H<sub>21</sub>O<sub>3</sub>)]

Deg. of freedom 102

Full point group C<sub>1</sub> NOp 1Largest Abelian subgroup C<sub>1</sub> NOp 1Largest concise Abelian subgroup C<sub>1</sub> NOp 1

Standard orientation:

| Center<br>Number            | Atomic<br>Number | Atomic<br>Type | Coordinates (Angstroms) |           |           |
|-----------------------------|------------------|----------------|-------------------------|-----------|-----------|
|                             |                  |                | X                       | Y         | Z         |
| 1                           | 6                | 0              | 1.358986                | -0.756285 | -0.046465 |
| 2                           | 6                | 0              | 0.069902                | -0.140274 | -0.060458 |
| 3                           | 6                | 0              | -1.075140               | -0.989154 | -0.116270 |
| 4                           | 6                | 0              | -0.913596               | -2.367445 | -0.131883 |
| 5                           | 6                | 0              | 0.343743                | -2.959020 | -0.105504 |
| 6                           | 6                | 0              | 1.466768                | -2.138370 | -0.066545 |
| 7                           | 1                | 0              | -1.791396               | -3.005336 | -0.173193 |
| 8                           | 1                | 0              | 0.448086                | -4.038291 | -0.124417 |
| 9                           | 8                | 0              | -0.037165               | 1.153091  | -0.028665 |
| 10                          | 8                | 0              | 0.475970                | 3.387682  | -1.575367 |
| 11                          | 1                | 0              | -0.276447               | 3.771058  | -1.108414 |
| 12                          | 1                | 0              | 0.496613                | 2.494700  | -1.174380 |
| 13                          | 8                | 0              | -1.556722               | 3.193460  | 0.641465  |
| 14                          | 1                | 0              | -1.095562               | 2.337698  | 0.420597  |
| 15                          | 1                | 0              | -1.091015               | 3.512232  | 1.417104  |
| 16                          | 1                | 0              | 2.450004                | -2.597917 | -0.057373 |
| 17                          | 6                | 0              | -2.442748               | -0.336507 | -0.121060 |
| 18                          | 1                | 0              | -2.314434               | 0.637401  | -0.599861 |
| 19                          | 6                | 0              | -3.500267               | -1.109528 | -0.910583 |
| 20                          | 1                | 0              | -3.747593               | -2.064541 | -0.436667 |
| 21                          | 1                | 0              | -4.425839               | -0.528872 | -0.971796 |
| 22                          | 1                | 0              | -3.160930               | -1.318845 | -1.927934 |
| 23                          | 6                | 0              | -2.930358               | -0.075407 | 1.309879  |
| 24                          | 1                | 0              | -2.195516               | 0.509126  | 1.864194  |
| 25                          | 1                | 0              | -3.872849               | 0.481806  | 1.311803  |
| 26                          | 1                | 0              | -3.086065               | -1.022011 | 1.838593  |
| 27                          | 6                | 0              | 2.564827                | 0.159850  | 0.019909  |
| 28                          | 1                | 0              | 2.342548                | 1.010051  | -0.631513 |
| 29                          | 6                | 0              | 3.867579                | -0.475265 | -0.463948 |
| 30                          | 1                | 0              | 4.664041                | 0.274433  | -0.491037 |
| 31                          | 1                | 0              | 4.200172                | -1.278790 | 0.200896  |
| 32                          | 1                | 0              | 3.760883                | -0.893502 | -1.468011 |
| 33                          | 6                | 0              | 2.739383                | 0.727475  | 1.434553  |
| 34                          | 1                | 0              | 3.553397                | 1.460086  | 1.467975  |
| 35                          | 1                | 0              | 1.819589                | 1.219667  | 1.750628  |
| 36                          | 1                | 0              | 2.971170                | -0.074433 | 2.143591  |
| Rotational constants (GHZ): |                  |                | 0.5861723               | 0.4602902 | 0.2994736 |

**2-methyl-4-terz-butylphenol**

Electronic Energy -656.796779

Stoichiometry C<sub>11</sub>H<sub>20</sub>O<sub>3</sub>Framework group C1[X(C<sub>11</sub>H<sub>20</sub>O<sub>3</sub>)]

Deg. of freedom 96

Full point group C<sub>1</sub> NOp 1Largest Abelian subgroup C<sub>1</sub> NOp 1Largest concise Abelian subgroup C<sub>1</sub> NOp 1

Standard orientation:

| Center<br>Number | Atomic<br>Number | Atomic<br>Type | Coordinates (Angstroms) |           |           |
|------------------|------------------|----------------|-------------------------|-----------|-----------|
|                  |                  |                | X                       | Y         | Z         |
| 1                | 6                | 0              | 0.984974                | -1.396293 | -0.212136 |
| 2                | 6                | 0              | -0.396893               | -1.450016 | -0.349260 |
| 3                | 6                | 0              | -1.150512               | -0.288837 | -0.316159 |
| 4                | 6                | 0              | -0.527041               | 0.951737  | -0.150108 |
| 5                | 6                | 0              | 0.856132                | 0.968622  | -0.011581 |
| 6                | 6                | 0              | 1.645864                | -0.183872 | -0.037279 |
| 7                | 1                | 0              | 1.537229                | -2.325605 | -0.242637 |

|    |   |   |           |           |           |
|----|---|---|-----------|-----------|-----------|
| 8  | 1 | 0 | -0.902025 | -2.399587 | -0.482067 |
| 9  | 1 | 0 | 1.328889  | 1.935902  | 0.118544  |
| 10 | 8 | 0 | -2.503884 | -0.410538 | -0.472101 |
| 11 | 1 | 0 | -3.003678 | 0.406914  | -0.277129 |
| 12 | 8 | 0 | -4.611574 | 1.120304  | 0.293096  |
| 13 | 1 | 0 | -5.192453 | 1.643126  | -0.267925 |
| 14 | 1 | 0 | -5.025677 | 0.241617  | 0.383924  |
| 15 | 8 | 0 | -4.821485 | -1.624368 | 0.509252  |
| 16 | 1 | 0 | -3.930225 | -1.587614 | 0.123592  |
| 17 | 1 | 0 | -5.315525 | -2.267691 | -0.008161 |
| 18 | 6 | 0 | 3.166499  | -0.073563 | 0.121399  |
| 19 | 6 | 0 | 3.741448  | 0.796127  | -1.009811 |
| 20 | 1 | 0 | 3.322697  | 1.804097  | -0.997790 |
| 21 | 1 | 0 | 4.826249  | 0.883638  | -0.905101 |
| 22 | 1 | 0 | 3.529010  | 0.353867  | -1.986293 |
| 23 | 6 | 0 | 3.498130  | 0.575371  | 1.476176  |
| 24 | 1 | 0 | 3.108859  | -0.026435 | 2.301138  |
| 25 | 1 | 0 | 4.581178  | 0.660543  | 1.599237  |
| 26 | 1 | 0 | 3.073041  | 1.577286  | 1.559670  |
| 27 | 6 | 0 | 3.852983  | -1.442216 | 0.067110  |
| 28 | 1 | 0 | 3.509122  | -2.100993 | 0.867864  |
| 29 | 1 | 0 | 3.681771  | -1.944874 | -0.887588 |
| 30 | 1 | 0 | 4.931220  | -1.312912 | 0.184619  |
| 31 | 6 | 0 | -1.329104 | 2.224706  | -0.133522 |
| 32 | 1 | 0 | -1.866243 | 2.371817  | -1.075309 |
| 33 | 1 | 0 | -2.074995 | 2.227626  | 0.665533  |
| 34 | 1 | 0 | -0.677784 | 3.085494  | 0.014934  |

-----

|                             |           |           |           |
|-----------------------------|-----------|-----------|-----------|
| Rotational constants (GHZ): | 1.3749873 | 0.2733280 | 0.2436996 |
|-----------------------------|-----------|-----------|-----------|

**2-methyl-4-terz-butylphenolate**

Electronic Energy -656.328185

Stoichiometry C11H19O3(1-)

Framework group C1[X(C11H19O3)]

Deg. of freedom 93

Full point group C1 NOp 1

Largest Abelian subgroup C1 NOp 1

Largest concise Abelian subgroup C1 NOp 1

Standard orientation:

| Center<br>Number | Atomic<br>Number | Atomic<br>Type | Coordinates (Angstroms) |           |           |
|------------------|------------------|----------------|-------------------------|-----------|-----------|
|                  |                  |                | X                       | Y         | Z         |
| 1                | 6                | 0              | -0.807627               | 1.025580  | 0.086940  |
| 2                | 6                | 0              | 0.570327                | 1.072407  | 0.236687  |
| 3                | 6                | 0              | 1.310660                | -0.135982 | 0.345768  |
| 4                | 6                | 0              | 0.575425                | -1.332812 | 0.292213  |
| 5                | 6                | 0              | -0.807955               | -1.344862 | 0.139541  |
| 6                | 6                | 0              | -1.541588               | -0.167128 | 0.032539  |
| 7                | 1                | 0              | -1.332629               | 1.973472  | 0.009294  |
| 8                | 1                | 0              | 1.116433                | -2.270373 | 0.375711  |
| 9                | 1                | 0              | -1.307599               | -2.305379 | 0.106545  |
| 10               | 8                | 0              | 2.614765                | -0.122162 | 0.497152  |
| 11               | 8                | 0              | 4.350057                | -1.938726 | -0.221469 |
| 12               | 1                | 0              | 4.596441                | -2.495454 | 0.521710  |
| 13               | 1                | 0              | 3.613143                | -1.344494 | 0.106825  |
| 14               | 8                | 0              | 4.682556                | 1.041832  | -0.697101 |
| 15               | 1                | 0              | 3.830205                | 0.786341  | -0.262312 |
| 16               | 1                | 0              | 5.124040                | 0.188199  | -0.778641 |
| 17               | 6                | 0              | -3.064892               | -0.129142 | -0.134443 |
| 18               | 6                | 0              | -3.700982               | 0.633782  | 1.040762  |
| 19               | 1                | 0              | -3.332448               | 1.659732  | 1.100463  |
| 20               | 1                | 0              | -4.788329               | 0.674737  | 0.927385  |
| 21               | 1                | 0              | -3.476818               | 0.140064  | 1.989811  |
| 22               | 6                | 0              | -3.430021               | 0.584502  | -1.447903 |
| 23               | 1                | 0              | -3.008136               | 0.055722  | -2.306463 |
| 24               | 1                | 0              | -4.516105               | 0.623898  | -1.573210 |
| 25               | 1                | 0              | -3.054354               | 1.609411  | -1.466657 |
| 26               | 6                | 0              | -3.676542               | -1.533592 | -0.173477 |
| 27               | 1                | 0              | -3.289298               | -2.120890 | -1.009420 |
| 28               | 1                | 0              | -3.482715               | -2.085611 | 0.749211  |
| 29               | 1                | 0              | -4.760038               | -1.458293 | -0.294108 |

|    |   |   |          |          |           |
|----|---|---|----------|----------|-----------|
| 30 | 6 | 0 | 1.303223 | 2.383917 | 0.290883  |
| 31 | 1 | 0 | 1.867793 | 2.486082 | 1.222232  |
| 32 | 1 | 0 | 2.030843 | 2.471075 | -0.521206 |
| 33 | 1 | 0 | 0.610380 | 3.224187 | 0.217117  |

Rotational constants (GHZ): 1.2856518 0.2918145 0.2562683

#### 4-bromothymol

Electronic Energy -3191.144763

Stoichiometry C10H17BrO3

Framework group C1[X(C10H17BrO3)]

Deg. of freedom 87

Full point group C1 NOp 1

Largest Abelian subgroup C1 NOp 1

Largest concise Abelian subgroup C1 NOp 1

Standard orientation:

| Center<br>Number | Atomic<br>Number | Atomic<br>Type | Coordinates (Angstroms) |           |           |
|------------------|------------------|----------------|-------------------------|-----------|-----------|
|                  |                  |                | X                       | Y         | Z         |
| 1                | 6                | 0              | -1.414478               | 2.155394  | -0.298382 |
| 2                | 1                | 0              | -2.259062               | 1.911554  | -0.947887 |
| 3                | 6                | 0              | -0.543283               | 0.915975  | -0.235994 |
| 4                | 6                | 0              | 0.837976                | 0.974774  | -0.103782 |
| 5                | 6                | 0              | -1.126362               | -0.355740 | -0.276675 |
| 6                | 6                | 0              | 1.604419                | -0.177968 | -0.014781 |
| 7                | 1                | 0              | 1.331928                | 1.936245  | -0.072032 |
| 8                | 6                | 0              | -0.348322               | -1.503534 | -0.190529 |
| 9                | 6                | 0              | 1.037144                | -1.447052 | -0.056272 |
| 10               | 1                | 0              | -0.834354               | -2.472490 | -0.229454 |
| 11               | 6                | 0              | -0.709127               | 3.373265  | -0.892996 |
| 12               | 1                | 0              | -1.423110               | 4.190615  | -1.014441 |
| 13               | 1                | 0              | 0.091470                | 3.737342  | -0.244217 |
| 14               | 1                | 0              | -0.279277               | 3.151584  | -1.872227 |
| 15               | 6                | 0              | -1.979435               | 2.483424  | 1.090413  |
| 16               | 1                | 0              | -2.677232               | 3.322499  | 1.033853  |
| 17               | 1                | 0              | -2.507508               | 1.629813  | 1.519440  |
| 18               | 1                | 0              | -1.173094               | 2.759006  | 1.775721  |
| 19               | 6                | 0              | 1.842784                | -2.711330 | 0.033982  |
| 20               | 1                | 0              | 1.193011                | -3.584332 | -0.017895 |
| 21               | 1                | 0              | 2.569300                | -2.775507 | -0.778960 |
| 22               | 1                | 0              | 2.403641                | -2.756118 | 0.970045  |
| 23               | 8                | 0              | -2.477711               | -0.436240 | -0.409377 |
| 24               | 1                | 0              | -2.791678               | -1.367329 | -0.430201 |
| 25               | 8                | 0              | -5.169899               | -0.319857 | 0.504931  |
| 26               | 1                | 0              | -4.298015               | 0.087608  | 0.391387  |
| 27               | 1                | 0              | -5.504517               | -0.011103 | 1.352737  |
| 28               | 8                | 0              | -3.937691               | -2.680254 | -0.179578 |
| 29               | 1                | 0              | -4.291909               | -3.199594 | -0.908257 |
| 30               | 1                | 0              | -4.644864               | -2.069081 | 0.101979  |
| 31               | 35               | 0              | 3.501994                | 0.021624  | 0.163220  |

Rotational constants (GHZ): 0.6975886 0.2396062 0.1852995

#### 4-bromothymolate

Electronic Energy -3190.678091

Stoichiometry C10H16BrO3(1-)

Framework group C1[X(C10H16BrO3)]

Deg. of freedom 84

Full point group C1 NOp 1

Largest Abelian subgroup C1 NOp 1

Largest concise Abelian subgroup C1 NOp 1

Standard orientation:

| Center<br>Number | Atomic<br>Number | Atomic<br>Type | Coordinates (Angstroms) |           |           |
|------------------|------------------|----------------|-------------------------|-----------|-----------|
|                  |                  |                | X                       | Y         | Z         |
| 1                | 6                | 0              | 1.569554                | 2.000982  | -0.229044 |
| 2                | 1                | 0              | 2.412434                | 1.704658  | -0.860239 |
| 3                | 6                | 0              | 0.635787                | 0.808458  | -0.185622 |
| 4                | 6                | 0              | -0.739576               | 0.950018  | -0.090617 |
| 5                | 6                | 0              | 1.193115                | -0.503635 | -0.213355 |

|    |    |   |           |           |           |
|----|----|---|-----------|-----------|-----------|
| 6  | 6  | 0 | -1.582570 | -0.152597 | -0.020160 |
| 7  | 1  | 0 | -1.176684 | 1.940388  | -0.072340 |
| 8  | 6  | 0 | 0.295593  | -1.591582 | -0.145646 |
| 9  | 6  | 0 | -1.085144 | -1.451689 | -0.047027 |
| 10 | 1  | 0 | 0.718956  | -2.590768 | -0.172975 |
| 11 | 6  | 0 | 2.131749  | 2.301942  | 1.167022  |
| 12 | 1  | 0 | 2.879535  | 3.099118  | 1.124329  |
| 13 | 1  | 0 | 1.331296  | 2.626097  | 1.838849  |
| 14 | 1  | 0 | 2.602272  | 1.417829  | 1.599865  |
| 15 | 6  | 0 | 0.951452  | 3.260009  | -0.835991 |
| 16 | 1  | 0 | 1.711580  | 4.038450  | -0.937567 |
| 17 | 1  | 0 | 0.532265  | 3.066020  | -1.826111 |
| 18 | 1  | 0 | 0.155432  | 3.667394  | -0.206732 |
| 19 | 6  | 0 | -1.968607 | -2.666899 | 0.022036  |
| 20 | 1  | 0 | -2.679107 | -2.690807 | -0.807691 |
| 21 | 1  | 0 | -1.369902 | -3.576965 | -0.015587 |
| 22 | 1  | 0 | -2.554930 | -2.681508 | 0.943904  |
| 23 | 8  | 0 | 2.478463  | -0.698197 | -0.307046 |
| 24 | 8  | 0 | 4.040636  | -2.765211 | 0.067123  |
| 25 | 1  | 0 | 4.037266  | -3.357313 | -0.689563 |
| 26 | 1  | 0 | 3.335338  | -2.080072 | -0.111042 |
| 27 | 8  | 0 | 4.992522  | 0.059711  | 0.197743  |
| 28 | 1  | 0 | 4.022205  | 0.025207  | 0.034681  |
| 29 | 1  | 0 | 5.216497  | -0.879774 | 0.204860  |
| 30 | 35 | 0 | -3.476444 | 0.164903  | 0.107464  |

-----  
Rotational constants (GHZ):      0.7283951      0.2433800      0.1884423

#### 4-chlorothymol

Electronic Energy -1077.127229

Stoichiometry C10H17ClO3

Framework group C1[X(C10H17ClO3)]

Deg. of freedom 87

Full point group C1 NOp 1

Largest Abelian subgroup C1 NOp 1

Largest concise Abelian subgroup C1 NOp 1

Standard orientation:

| Center<br>Number | Atomic<br>Number | Atomic<br>Type | Coordinates (Angstroms) |           |           |
|------------------|------------------|----------------|-------------------------|-----------|-----------|
|                  |                  |                | X                       | Y         | Z         |
| 1                | 6                | 0              | 0.116745                | -1.448408 | -0.272339 |
| 2                | 6                | 0              | -0.627412               | -0.275749 | -0.241060 |
| 3                | 6                | 0              | -0.013073               | 0.965250  | -0.035235 |
| 4                | 6                | 0              | 1.365491                | 0.968016  | 0.132269  |
| 5                | 6                | 0              | 2.097948                | -0.208459 | 0.094091  |
| 6                | 6                | 0              | 1.499650                | -1.446389 | -0.107479 |
| 7                | 1                | 0              | -0.395332               | -2.391750 | -0.428069 |
| 8                | 1                | 0              | 1.887519                | 1.900342  | 0.299118  |
| 9                | 8                | 0              | -1.978846               | -0.300304 | -0.407673 |
| 10               | 1                | 0              | -2.309372               | -1.216751 | -0.537606 |
| 11               | 6                | 0              | -0.843561               | 2.234115  | -0.034045 |
| 12               | 1                | 0              | -1.785963               | 1.992638  | 0.465381  |
| 13               | 6                | 0              | -1.181487               | 2.656296  | -1.470328 |
| 14               | 1                | 0              | -1.680511               | 1.851654  | -2.012074 |
| 15               | 1                | 0              | -1.841604               | 3.527306  | -1.468416 |
| 16               | 1                | 0              | -0.271026               | 2.923176  | -2.014084 |
| 17               | 6                | 0              | -0.200008               | 3.390314  | 0.728865  |
| 18               | 1                | 0              | -0.898476               | 4.227675  | 0.786729  |
| 19               | 1                | 0              | 0.068112                | 3.103240  | 1.747988  |
| 20               | 1                | 0              | 0.701295                | 3.754836  | 0.229394  |
| 21               | 6                | 0              | 2.280189                | -2.728691 | -0.145926 |
| 22               | 1                | 0              | 2.819317                | -2.890921 | 0.790000  |
| 23               | 1                | 0              | 1.616529                | -3.576865 | -0.310448 |
| 24               | 1                | 0              | 3.023900                | -2.714301 | -0.945723 |
| 25               | 8                | 0              | -4.347132               | -0.541065 | 1.191309  |
| 26               | 1                | 0              | -3.532215               | -0.081817 | 0.936262  |
| 27               | 1                | 0              | -4.422496               | -0.448625 | 2.146281  |
| 28               | 8                | 0              | -3.352299               | -2.615521 | -0.309456 |
| 29               | 1                | 0              | -3.883362               | -2.988661 | -1.019996 |
| 30               | 1                | 0              | -3.962621               | -2.127749 | 0.275560  |
| 31               | 17               | 0              | 3.842685                | -0.107416 | 0.316082  |

Rotational constants (GHZ): 0.6530656 0.3494788 0.2472950

#### 4-chlorothymolate

Electronic Energy -1076.660134

Stoichiometry C10H16ClO3(1-)

Framework group C1[X(C10H16ClO3)]

Deg. of freedom 84

Full point group C1 NOp 1

Largest Abelian subgroup C1 NOp 1

Largest concise Abelian subgroup C1 NOp 1

Standard orientation:

| Center<br>Number | Atomic<br>Number | Atomic<br>Type | Coordinates (Angstroms) |           |           |
|------------------|------------------|----------------|-------------------------|-----------|-----------|
|                  |                  |                | X                       | Y         | Z         |
| 1                | 6                | 0              | 0.307827                | -1.545699 | -0.140446 |
| 2                | 6                | 0              | -0.623050               | -0.487534 | -0.225263 |
| 3                | 6                | 0              | -0.110340               | 0.841872  | -0.181345 |
| 4                | 6                | 0              | 1.257307                | 1.028934  | -0.054568 |
| 5                | 6                | 0              | 2.132781                | -0.045106 | 0.031536  |
| 6                | 6                | 0              | 1.680046                | -1.358892 | -0.010052 |
| 7                | 1                | 0              | -0.080683               | -2.558520 | -0.179692 |
| 8                | 1                | 0              | 1.665186                | 2.031720  | -0.022967 |
| 9                | 8                | 0              | -1.900235               | -0.723854 | -0.348999 |
| 10               | 6                | 0              | -1.081257               | 2.003421  | -0.241570 |
| 11               | 1                | 0              | -1.909809               | 1.674169  | -0.875124 |
| 12               | 6                | 0              | -0.498375               | 3.275778  | -0.855854 |
| 13               | 1                | 0              | -0.066274               | 3.085714  | -1.841169 |
| 14               | 1                | 0              | -1.281412               | 4.029425  | -0.969993 |
| 15               | 1                | 0              | 0.280193                | 3.713400  | -0.225082 |
| 16               | 6                | 0              | -1.662128               | 2.298783  | 1.148019  |
| 17               | 1                | 0              | -2.433539               | 3.072412  | 1.093643  |
| 18               | 1                | 0              | -2.108617               | 1.404425  | 1.585473  |
| 19               | 1                | 0              | -0.876808               | 2.652479  | 1.822813  |
| 20               | 6                | 0              | 2.611400                | -2.536443 | 0.076548  |
| 21               | 1                | 0              | 2.052371                | -3.470690 | 0.024478  |
| 22               | 1                | 0              | 3.340466                | -2.528503 | -0.737335 |
| 23               | 1                | 0              | 3.177948                | -2.528618 | 1.010867  |
| 24               | 8                | 0              | -3.357283               | -2.872086 | -0.023224 |
| 25               | 1                | 0              | -3.354626               | -3.424497 | -0.809346 |
| 26               | 1                | 0              | -2.689061               | -2.146611 | -0.188513 |
| 27               | 8                | 0              | -4.421865               | -0.113705 | 0.301856  |
| 28               | 1                | 0              | -3.459419               | -0.093590 | 0.094982  |
| 29               | 1                | 0              | -4.601693               | -1.062227 | 0.269111  |
| 30               | 17               | 0              | 3.864446                | 0.292705  | 0.189927  |

Rotational constants (GHZ): 0.7259885 0.3459574 0.2447423

#### 4-methoxyphenol

Electronic Energy -574.807744

Stoichiometry C7H12O4

Framework group C1[X(C7H12O4)]

Deg. of freedom 63

Full point group C1 NOp 1

Largest Abelian subgroup C1 NOp 1

Largest concise Abelian subgroup C1 NOp 1

Standard orientation:

| Center<br>Number | Atomic<br>Number | Atomic<br>Type | Coordinates (Angstroms) |           |           |
|------------------|------------------|----------------|-------------------------|-----------|-----------|
|                  |                  |                | X                       | Y         | Z         |
| 1                | 6                | 0              | 1.998538                | 1.078159  | -0.532957 |
| 2                | 6                | 0              | 0.761992                | 1.673956  | -0.338591 |
| 3                | 6                | 0              | -0.328659               | 0.910020  | 0.072269  |
| 4                | 6                | 0              | -0.166538               | -0.457281 | 0.286248  |
| 5                | 6                | 0              | 1.076136                | -1.048192 | 0.094215  |
| 6                | 6                | 0              | 2.158795                | -0.284851 | -0.315222 |
| 7                | 1                | 0              | 2.844372                | 1.670002  | -0.862830 |
| 8                | 1                | 0              | 0.626613                | 2.735012  | -0.510031 |
| 9                | 1                | 0              | -1.014770               | -1.052558 | 0.602247  |
| 10               | 1                | 0              | 1.208192                | -2.111429 | 0.256275  |

|    |   |   |           |           |           |
|----|---|---|-----------|-----------|-----------|
| 11 | 8 | 0 | -1.518299 | 1.538891  | 0.244370  |
| 12 | 1 | 0 | -2.218274 | 0.909990  | 0.532762  |
| 13 | 8 | 0 | -3.462662 | -0.147660 | 1.040470  |
| 14 | 1 | 0 | -3.942502 | 0.070192  | 1.845475  |
| 15 | 1 | 0 | -4.130573 | -0.446212 | 0.388833  |
| 16 | 8 | 0 | -5.307738 | -0.992370 | -0.803193 |
| 17 | 1 | 0 | -5.420981 | -0.474162 | -1.607273 |
| 18 | 1 | 0 | -5.284519 | -1.912961 | -1.085756 |
| 19 | 8 | 0 | 3.376596  | -0.893443 | -0.548918 |
| 20 | 6 | 0 | 4.319312  | -0.749680 | 0.510041  |
| 21 | 1 | 0 | 5.227881  | -1.260659 | 0.196441  |
| 22 | 1 | 0 | 4.542446  | 0.304441  | 0.697094  |
| 23 | 1 | 0 | 3.941487  | -1.207783 | 1.428910  |

Rotational constants (GHZ):      2.2273278      0.3515120      0.3251593

#### 4-methoxyphenolate

Electronic Energy -574.339791

Stoichiometry C7H11O4(1-)

Framework group C1[X(C7H11O4)]

Deg. of freedom 60

Full point group C1 NOp 1

Largest Abelian subgroup C1 NOp 1

Largest concise Abelian subgroup C1 NOp 1

Standard orientation:

| Center<br>Number | Atomic<br>Number | Atomic<br>Type | Coordinates (Angstroms) |           |           |
|------------------|------------------|----------------|-------------------------|-----------|-----------|
|                  |                  |                | X                       | Y         | Z         |
| 1                | 6                | 0              | 1.288625                | -1.200115 | -0.251506 |
| 2                | 6                | 0              | -0.094862               | -1.202231 | -0.146444 |
| 3                | 6                | 0              | -0.836437               | -0.000702 | -0.086279 |
| 4                | 6                | 0              | -0.092468               | 1.199678  | -0.141733 |
| 5                | 6                | 0              | 1.290829                | 1.195281  | -0.247947 |
| 6                | 6                | 0              | 1.990038                | -0.003034 | -0.302859 |
| 7                | 1                | 0              | 1.834766                | -2.136328 | -0.301528 |
| 8                | 1                | 0              | -0.632643               | -2.143419 | -0.112543 |
| 9                | 1                | 0              | -0.628447               | 2.141800  | -0.105463 |
| 10               | 1                | 0              | 1.838522                | 2.130740  | -0.295324 |
| 11               | 8                | 0              | -2.145056               | 0.000383  | 0.011895  |
| 12               | 8                | 0              | -3.619995               | 2.167709  | 0.069207  |
| 13               | 1                | 0              | -3.430007               | 2.628815  | 0.890250  |
| 14               | 1                | 0              | -3.019021               | 1.367089  | 0.062569  |
| 15               | 8                | 0              | -3.609891               | -2.157905 | 0.288194  |
| 16               | 1                | 0              | -3.015288               | -1.362591 | 0.162615  |
| 17               | 1                | 0              | -3.553986               | -2.656291 | -0.531152 |
| 18               | 8                | 0              | 3.370699                | -0.004516 | -0.450590 |
| 19               | 6                | 0              | 4.086102                | 0.004939  | 0.778735  |
| 20               | 1                | 0              | 3.850924                | -0.882248 | 1.374926  |
| 21               | 1                | 0              | 5.147274                | 0.003223  | 0.532657  |
| 22               | 1                | 0              | 3.850891                | 0.900939  | 1.361538  |

Rotational constants (GHZ):      1.8252678      0.4605878      0.3789666

#### 4-hydroxybenzonitrile

Electronic Energy -552.532119

Stoichiometry C7H9NO3

Framework group C1[X(C7H9NO3)]

Deg. of freedom 54

Full point group C1 NOp 1

Largest Abelian subgroup C1 NOp 1

Largest concise Abelian subgroup C1 NOp 1

Standard orientation:

| Center<br>Number | Atomic<br>Number | Atomic<br>Type | Coordinates (Angstroms) |           |           |
|------------------|------------------|----------------|-------------------------|-----------|-----------|
|                  |                  |                | X                       | Y         | Z         |
| 1                | 6                | 0              | 1.759995                | -1.233893 | -0.232874 |
| 2                | 6                | 0              | 0.409843                | -1.378216 | -0.475867 |
| 3                | 6                | 0              | -0.429821               | -0.264564 | -0.431004 |
| 4                | 6                | 0              | 0.094098                | 0.996088  | -0.138719 |
| 5                | 6                | 0              | 1.446446                | 1.139330  | 0.103743  |

|    |   |   |           |           |           |
|----|---|---|-----------|-----------|-----------|
| 6  | 6 | 0 | 2.289996  | 0.027020  | 0.058814  |
| 7  | 1 | 0 | 2.411043  | -2.097895 | -0.267975 |
| 8  | 1 | 0 | -0.012873 | -2.348318 | -0.703361 |
| 9  | 1 | 0 | -0.562847 | 1.856406  | -0.102179 |
| 10 | 1 | 0 | 1.853004  | 2.116681  | 0.329887  |
| 11 | 8 | 0 | -1.740066 | -0.454254 | -0.676528 |
| 12 | 1 | 0 | -2.254838 | 0.386072  | -0.610490 |
| 13 | 8 | 0 | -3.463509 | 1.501746  | -0.139855 |
| 14 | 1 | 0 | -4.036548 | 1.932880  | -0.781832 |
| 15 | 1 | 0 | -4.002447 | 0.830490  | 0.321318  |
| 16 | 8 | 0 | -4.174836 | -0.927361 | 0.897974  |
| 17 | 1 | 0 | -3.316700 | -1.270012 | 0.611282  |
| 18 | 1 | 0 | -4.292257 | -1.221905 | 1.806803  |
| 19 | 6 | 0 | 3.687127  | 0.176790  | 0.309520  |
| 20 | 7 | 0 | 4.813665  | 0.297033  | 0.511734  |

Rotational constants (GHZ):      2.7083813      0.4047179      0.3710987

#### 4-cyanophenolate

Electronic Energy -552.073802

Stoichiometry C7H8NO3(1-)

Framework group C1[X(C7H8NO3)]

Deg. of freedom 51

Full point group C1 NOp 1

Largest Abelian subgroup C1 NOp 1

Largest concise Abelian subgroup C1 NOp 1

Standard orientation:

| Center<br>Number | Atomic<br>Number | Atomic<br>Type | Coordinates (Angstroms) |           |           |
|------------------|------------------|----------------|-------------------------|-----------|-----------|
|                  |                  |                | X                       | Y         | Z         |
| 1                | 6                | 0              | 1.447016                | -1.204387 | 0.093114  |
| 2                | 6                | 0              | 0.071867                | -1.206699 | 0.093612  |
| 3                | 6                | 0              | -0.675111               | 0.000019  | 0.000032  |
| 4                | 6                | 0              | 0.071867                | 1.206736  | -0.093561 |
| 5                | 6                | 0              | 1.447016                | 1.204421  | -0.093098 |
| 6                | 6                | 0              | 2.161821                | 0.000016  | 0.000000  |
| 7                | 1                | 0              | 1.987748                | -2.140984 | 0.165912  |
| 8                | 1                | 0              | -0.471543               | -2.141407 | 0.166769  |
| 9                | 1                | 0              | -0.471545               | 2.141443  | -0.166702 |
| 10               | 1                | 0              | 1.987749                | 2.141016  | -0.165906 |
| 11               | 8                | 0              | -1.966708               | 0.000024  | 0.000046  |
| 12               | 8                | 0              | -3.471564               | 2.194549  | 0.005319  |
| 13               | 1                | 0              | -3.883854               | 2.227486  | 0.872516  |
| 14               | 1                | 0              | -2.885971               | 1.392695  | 0.017955  |
| 15               | 8                | 0              | -3.471313               | -2.194689 | -0.005406 |
| 16               | 1                | 0              | -2.886030               | -1.392607 | -0.017900 |
| 17               | 1                | 0              | -3.883738               | -2.227517 | -0.872544 |
| 18               | 6                | 0              | 3.581524                | 0.000014  | -0.000019 |
| 19               | 7                | 0              | 4.735409                | 0.000012  | -0.000035 |

Rotational constants (GHZ):      1.9565927      0.4661451      0.3776052

#### 4-nitrophenol

Electronic Energy -664.810518

Stoichiometry C6H9NO5

Framework group C1[X(C6H9NO5)]

Deg. of freedom 57

Full point group C1 NOp 1

Largest Abelian subgroup C1 NOp 1

Largest concise Abelian subgroup C1 NOp 1

Standard orientation:

| Center<br>Number | Atomic<br>Number | Atomic<br>Type | Coordinates (Angstroms) |           |           |
|------------------|------------------|----------------|-------------------------|-----------|-----------|
|                  |                  |                | X                       | Y         | Z         |
| 1                | 6                | 0              | 1.722766                | -1.282841 | 0.290377  |
| 2                | 6                | 0              | 0.446113                | -1.790939 | 0.198724  |
| 3                | 6                | 0              | -0.620756               | -0.956366 | -0.155473 |
| 4                | 6                | 0              | -0.388138               | 0.400046  | -0.417561 |
| 5                | 6                | 0              | 0.889996                | 0.909955  | -0.326560 |
| 6                | 6                | 0              | 1.936899                | 0.066626  | 0.026638  |

|    |   |   |           |           |           |
|----|---|---|-----------|-----------|-----------|
| 7  | 1 | 0 | 2.553629  | -1.917552 | 0.563073  |
| 8  | 1 | 0 | 0.250042  | -2.836409 | 0.397814  |
| 9  | 1 | 0 | -1.217854 | 1.038875  | -0.691176 |
| 10 | 1 | 0 | 1.083135  | 1.954238  | -0.526189 |
| 11 | 8 | 0 | -1.838671 | -1.500242 | -0.229717 |
| 12 | 1 | 0 | -2.529702 | -0.836777 | -0.487081 |
| 13 | 8 | 0 | -3.686341 | 0.267383  | -0.909321 |
| 14 | 1 | 0 | -4.152938 | 0.141603  | -1.741503 |
| 15 | 1 | 0 | -4.357514 | 0.531206  | -0.244184 |
| 16 | 8 | 0 | -5.531005 | 1.015734  | 0.957263  |
| 17 | 1 | 0 | -5.788023 | 0.379408  | 1.633306  |
| 18 | 1 | 0 | -5.399765 | 1.851083  | 1.418666  |
| 19 | 7 | 0 | 3.279768  | 0.604067  | 0.122454  |
| 20 | 8 | 0 | 4.188929  | -0.150695 | 0.437380  |
| 21 | 8 | 0 | 3.452002  | 1.791192  | -0.115201 |

Rotational constants (GHZ): 1.9486458 0.3078253 0.2795524

#### 4-nitrophenolate

Electronic Energy -664.352895

Stoichiometry C<sub>6</sub>H<sub>8</sub>NO<sub>5</sub>(1-)

Framework group C1[X(C<sub>6</sub>H<sub>8</sub>NO<sub>5</sub>)]

Deg. of freedom 54

Full point group C1 NOp 1

Largest Abelian subgroup C1 NOp 1

Largest concise Abelian subgroup C1 NOp 1

Standard orientation:

| Center<br>Number | Atomic<br>Number | Atomic<br>Type | Coordinates (Angstroms) |           |           |
|------------------|------------------|----------------|-------------------------|-----------|-----------|
|                  |                  |                | X                       | Y         | Z         |
| 1                | 6                | 0              | 1.041300                | 1.212285  | -0.080860 |
| 2                | 6                | 0              | -0.328324               | 1.213733  | -0.080669 |
| 3                | 6                | 0              | -1.077179               | 0.000054  | 0.000103  |
| 4                | 6                | 0              | -0.328328               | -1.213632 | 0.080829  |
| 5                | 6                | 0              | 1.041295                | -1.212195 | 0.080912  |
| 6                | 6                | 0              | 1.739138                | 0.000042  | -0.000004 |
| 7                | 1                | 0              | 1.594664                | 2.139226  | -0.143370 |
| 8                | 1                | 0              | -0.874504               | 2.147105  | -0.143321 |
| 9                | 1                | 0              | -0.874513               | -2.146999 | 0.143518  |
| 10               | 1                | 0              | 1.594657                | -2.139140 | 0.143381  |
| 11               | 8                | 0              | -2.358667               | 0.000057  | 0.000145  |
| 12               | 8                | 0              | -3.886762               | -2.204377 | -0.022720 |
| 13               | 1                | 0              | -4.302690               | -2.228133 | -0.888549 |
| 14               | 1                | 0              | -3.301855               | -1.406794 | -0.030015 |
| 15               | 8                | 0              | -3.887872               | 2.203705  | 0.022319  |
| 16               | 1                | 0              | -3.302381               | 1.406557  | 0.029905  |
| 17               | 1                | 0              | -4.299573               | 2.230603  | 0.890074  |
| 18               | 7                | 0              | 3.161354                | 0.000035  | -0.000056 |
| 19               | 8                | 0              | 3.760984                | 1.074400  | -0.073463 |
| 20               | 8                | 0              | 3.760979                | -1.074335 | 0.073331  |

Rotational constants (GHZ): 1.6979030 0.3855860 0.3150706

#### 4-nitrothymol

Electronic Energy -822.006976

Stoichiometry C<sub>10</sub>H<sub>17</sub>NO<sub>5</sub>

Framework group C1[X(C<sub>10</sub>H<sub>17</sub>NO<sub>5</sub>)]

Deg. of freedom 93

Full point group C1 NOp 1

Largest Abelian subgroup C1 NOp 1

Largest concise Abelian subgroup C1 NOp 1

Standard orientation:

| Center<br>Number | Atomic<br>Number | Atomic<br>Type | Coordinates (Angstroms) |           |           |
|------------------|------------------|----------------|-------------------------|-----------|-----------|
|                  |                  |                | X                       | Y         | Z         |
| 1                | 6                | 0              | -1.203704               | 0.969686  | -0.080492 |
| 2                | 6                | 0              | 0.170896                | 0.922042  | -0.166109 |
| 3                | 6                | 0              | 0.761906                | -0.353707 | -0.143441 |
| 4                | 6                | 0              | -0.014991               | -1.504887 | -0.041525 |
| 5                | 6                | 0              | -1.401234               | -1.466220 | 0.031355  |



|    |   |   |           |           |           |
|----|---|---|-----------|-----------|-----------|
| 6  | 6 | 0 | -1.976075 | -0.188700 | 0.009171  |
| 7  | 1 | 0 | -1.717604 | 1.919204  | -0.094775 |
| 8  | 1 | 0 | 0.484170  | -2.466658 | -0.014445 |
| 9  | 8 | 0 | 2.101046  | -0.428240 | -0.226289 |
| 10 | 1 | 0 | 2.431486  | -1.359019 | -0.215593 |
| 11 | 8 | 0 | 3.534962  | -2.657455 | -0.064279 |
| 12 | 1 | 0 | 3.697644  | -3.262432 | -0.795040 |
| 13 | 1 | 0 | 4.310369  | -2.065712 | -0.007170 |
| 14 | 8 | 0 | 5.009694  | -0.358498 | 0.076192  |
| 15 | 1 | 0 | 4.207191  | 0.178844  | 0.118891  |
| 16 | 1 | 0 | 5.595504  | -0.020960 | 0.761392  |
| 17 | 7 | 0 | -3.413966 | 0.000645  | 0.078043  |
| 18 | 8 | 0 | -3.842875 | 1.099493  | 0.407335  |
| 19 | 8 | 0 | -4.148083 | -0.935860 | -0.202089 |
| 20 | 6 | 0 | 1.040673  | 2.159810  | -0.251748 |
| 21 | 1 | 0 | 1.877531  | 1.908771  | -0.908930 |
| 22 | 6 | 0 | 1.622297  | 2.501629  | 1.126954  |
| 23 | 1 | 0 | 2.162057  | 1.654892  | 1.553943  |
| 24 | 1 | 0 | 2.314460  | 3.343633  | 1.051423  |
| 25 | 1 | 0 | 0.823788  | 2.780617  | 1.819828  |
| 26 | 6 | 0 | 0.324722  | 3.369040  | -0.849763 |
| 27 | 1 | 0 | -0.113665 | 3.138291  | -1.823091 |
| 28 | 1 | 0 | -0.470507 | 3.735175  | -0.195416 |
| 29 | 1 | 0 | 1.034698  | 4.187471  | -0.984570 |
| 30 | 6 | 0 | -2.149667 | -2.764406 | 0.152137  |
| 31 | 1 | 0 | -2.872747 | -2.740348 | 0.967418  |
| 32 | 1 | 0 | -2.708692 | -2.982066 | -0.758231 |
| 33 | 1 | 0 | -1.444815 | -3.575455 | 0.331877  |

Rotational constants (GHZ):      0.6696075      0.2953642      0.2127204

#### 4-nitrothymolate

Electronic Energy -821.549876

Stoichiometry C10H16NO5(1-)

Framework group C1[X(C10H16NO5)]

Deg. of freedom 90

Full point group C1 NOp 1

Largest Abelian subgroup C1 NOp 1

Largest concise Abelian subgroup C1 NOp 1

Standard orientation:

| Center<br>Number | Atomic<br>Number | Atomic<br>Type | Coordinates (Angstroms) |           |           |
|------------------|------------------|----------------|-------------------------|-----------|-----------|
|                  |                  |                | X                       | Y         | Z         |
| 1                | 6                | 0              | -1.088087               | 0.974478  | -0.079347 |
| 2                | 6                | 0              | 0.270252                | 0.824852  | -0.110198 |
| 3                | 6                | 0              | 0.811658                | -0.509022 | -0.080436 |
| 4                | 6                | 0              | -0.110981               | -1.590614 | -0.017031 |
| 5                | 6                | 0              | -1.479965               | -1.445083 | 0.020269  |
| 6                | 6                | 0              | -1.976179               | -0.118080 | -0.011834 |
| 7                | 1                | 0              | -1.526079               | 1.961198  | -0.107969 |
| 8                | 1                | 0              | 0.311727                | -2.589047 | 0.000645  |
| 9                | 8                | 0              | 2.071142                | -0.720008 | -0.114775 |
| 10               | 8                | 0              | 3.776872                | -2.763354 | -0.170500 |
| 11               | 1                | 0              | 3.691415                | -3.357329 | 0.580238  |
| 12               | 1                | 0              | 3.012950                | -2.137142 | -0.116290 |
| 13               | 8                | 0              | 4.693776                | 0.024127  | -0.135378 |
| 14               | 1                | 0              | 3.716302                | 0.040285  | -0.123850 |
| 15               | 1                | 0              | 4.867840                | -0.927232 | -0.121333 |
| 16               | 7                | 0              | -3.362934               | 0.182767  | 0.014570  |
| 17               | 8                | 0              | -3.727487               | 1.364433  | -0.042193 |
| 18               | 8                | 0              | -4.188965               | -0.730955 | 0.095425  |
| 19               | 6                | 0              | 1.229625                | 1.995196  | -0.151435 |
| 20               | 1                | 0              | 2.052768                | 1.695591  | -0.807454 |
| 21               | 6                | 0              | 1.826139                | 2.255604  | 1.238771  |
| 22               | 1                | 0              | 2.282341                | 1.353157  | 1.647926  |
| 23               | 1                | 0              | 2.592431                | 3.034066  | 1.192273  |
| 24               | 1                | 0              | 1.047202                | 2.589307  | 1.930445  |
| 25               | 6                | 0              | 0.623676                | 3.276618  | -0.719894 |
| 26               | 1                | 0              | 0.185567                | 3.112839  | -1.707124 |
| 27               | 1                | 0              | -0.154425               | 3.681681  | -0.067252 |
| 28               | 1                | 0              | 1.396115                | 4.043017  | -0.815839 |

|    |   |   |           |           |           |
|----|---|---|-----------|-----------|-----------|
| 29 | 6 | 0 | -2.324426 | -2.688698 | 0.085463  |
| 30 | 1 | 0 | -2.943553 | -2.705609 | 0.982715  |
| 31 | 1 | 0 | -3.007940 | -2.753864 | -0.761498 |
| 32 | 1 | 0 | -1.677092 | -3.565736 | 0.085777  |

Rotational constants (GHZ):      0.6941591      0.3012779      0.2174264

## - 2H<sub>2</sub>O/ B3LYP 6-311G+dp/SMD

### H<sub>2</sub>O

Electronic Energy -229.353562

Stoichiometry H<sub>6</sub>O<sub>3</sub>

Framework group C1[X(H<sub>6</sub>O<sub>3</sub>)]

Deg. of freedom 21

Full point group C1 NOp 1

Largest Abelian subgroup C1 NOp 1

Largest concise Abelian subgroup C1 NOp 1

Standard orientation:

| Center<br>Number | Atomic<br>Number | Atomic<br>Type | Coordinates (Angstroms) |           |           |
|------------------|------------------|----------------|-------------------------|-----------|-----------|
|                  |                  |                | X                       | Y         | Z         |
| 1                | 8                | 0              | 2.735801                | -0.325766 | 0.000189  |
| 2                | 1                | 0              | 1.777385                | -0.167268 | -0.000788 |
| 3                | 1                | 0              | 2.854479                | -1.282620 | -0.000811 |
| 4                | 8                | 0              | 0.000035                | 0.694272  | -0.000145 |
| 5                | 1                | 0              | 0.000379                | 1.277840  | 0.771765  |
| 6                | 1                | 0              | -0.000039               | 1.279670  | -0.770667 |
| 7                | 8                | 0              | -2.735859               | -0.325731 | 0.000100  |
| 8                | 1                | 0              | -2.854569               | -1.282580 | -0.000258 |
| 9                | 1                | 0              | -1.777449               | -0.167245 | -0.000393 |

Rotational constants (GHZ):      26.6419672      1.9184767      1.8049327

### OH

Electronic Energy -228.874555

Stoichiometry H<sub>5</sub>O<sub>3</sub>(1-)

Framework group C1[X(H<sub>5</sub>O<sub>3</sub>)]

Deg. of freedom 18

Full point group C1 NOp 1

Largest Abelian subgroup C1 NOp 1

Largest concise Abelian subgroup C1 NOp 1

Standard orientation:

| Center<br>Number | Atomic<br>Number | Atomic<br>Type | Coordinates (Angstroms) |           |           |
|------------------|------------------|----------------|-------------------------|-----------|-----------|
|                  |                  |                | X                       | Y         | Z         |
| 1                | 8                | 0              | 0.002573                | 0.774056  | 0.059619  |
| 2                | 1                | 0              | -0.001673               | 1.586363  | -0.461383 |
| 3                | 8                | 0              | -2.299048               | -0.359957 | 0.050835  |
| 4                | 1                | 0              | -2.085911               | -1.166115 | -0.433319 |
| 5                | 1                | 0              | -1.385258               | 0.138503  | 0.080533  |
| 6                | 8                | 0              | 2.250581                | -0.436666 | -0.101112 |
| 7                | 1                | 0              | 1.327618                | 0.052367  | -0.087303 |
| 8                | 1                | 0              | 2.512382                | -0.430583 | 0.826732  |

Rotational constants (GHZ):      25.0953866      2.7863934      2.5409504

### Phenol

Electronic Energy -460.411219

Stoichiometry C<sub>6</sub>H<sub>10</sub>O<sub>3</sub>

Framework group C1[X(C<sub>6</sub>H<sub>10</sub>O<sub>3</sub>)]

Deg. of freedom 51

Full point group C1 NOp 1

Largest Abelian subgroup C1 NOp 1

Largest concise Abelian subgroup C1 NOp 1

Standard orientation:

| Center<br>Number | Atomic<br>Number | Atomic<br>Type | Coordinates (Angstroms) |   |   |
|------------------|------------------|----------------|-------------------------|---|---|
|                  |                  |                | X                       | Y | Z |

|    |   |   |           |           |           |
|----|---|---|-----------|-----------|-----------|
| 1  | 6 | 0 | 2.964200  | -0.390659 | 0.530711  |
| 2  | 6 | 0 | 1.810158  | -1.172913 | 0.449199  |
| 3  | 6 | 0 | 0.627468  | -0.619687 | -0.061591 |
| 4  | 6 | 0 | 0.606148  | 0.715701  | -0.489894 |
| 5  | 6 | 0 | 1.769039  | 1.487575  | -0.402824 |
| 6  | 6 | 0 | 2.953086  | 0.943639  | 0.106250  |
| 7  | 1 | 0 | 3.875890  | -0.828007 | 0.928313  |
| 8  | 1 | 0 | 1.813119  | -2.208476 | 0.776642  |
| 9  | 1 | 0 | -0.310113 | 1.142478  | -0.886028 |
| 10 | 1 | 0 | 1.744116  | 2.521233  | -0.736822 |
| 11 | 1 | 0 | 3.852461  | 1.548424  | 0.170832  |
| 12 | 8 | 0 | -0.480716 | -1.430466 | -0.122085 |
| 13 | 1 | 0 | -1.269853 | -0.952600 | -0.490963 |
| 14 | 8 | 0 | -2.742693 | -0.299175 | -1.099414 |
| 15 | 1 | 0 | -3.283657 | -1.007738 | -1.477859 |
| 16 | 1 | 0 | -3.278052 | 0.072541  | -0.358634 |
| 17 | 8 | 0 | -4.129475 | 0.838829  | 1.015128  |
| 18 | 1 | 0 | -3.678972 | 0.584287  | 1.834252  |
| 19 | 1 | 0 | -5.022454 | 0.472408  | 1.100127  |

Rotational constants (GHZ):      2.7044459      0.5956508      0.5483634

### Phenolate

Electronic Energy -459.942619

Stoichiometry C<sub>6</sub>H<sub>9</sub>O<sub>3</sub>(1-)

Framework group C1[X(C<sub>6</sub>H<sub>9</sub>O<sub>3</sub>)]

Deg. of freedom 48

Full point group C1 NOp 1

Largest Abelian subgroup C1 NOp 1

Largest concise Abelian subgroup C1 NOp 1

Standard orientation:

| Center<br>Number | Atomic<br>Number | Atomic<br>Type | Coordinates (Angstroms) |           |           |
|------------------|------------------|----------------|-------------------------|-----------|-----------|
|                  |                  |                | X                       | Y         | Z         |
| 1                | 6                | 0              | -2.253191               | -1.199371 | -0.094639 |
| 2                | 6                | 0              | -0.859724               | -1.208477 | -0.096867 |
| 3                | 6                | 0              | -0.101532               | -0.000162 | -0.001151 |
| 4                | 6                | 0              | -0.859465               | 1.208197  | 0.095724  |
| 5                | 6                | 0              | -2.252956               | 1.199182  | 0.095533  |
| 6                | 6                | 0              | -2.975542               | -0.000052 | 0.000962  |
| 7                | 1                | 0              | -2.788653               | -2.145917 | -0.169196 |
| 8                | 1                | 0              | -0.312317               | -2.145183 | -0.170476 |
| 9                | 1                | 0              | -0.311939               | 2.144890  | 0.168570  |
| 10               | 1                | 0              | -2.788203               | 2.145786  | 0.170885  |
| 11               | 1                | 0              | -4.062832               | -0.000018 | 0.001751  |
| 12               | 8                | 0              | 1.201996                | -0.000265 | -0.002171 |
| 13               | 8                | 0              | 2.836666                | 2.116821  | -0.037236 |
| 14               | 1                | 0              | 3.365086                | 1.868616  | -0.804494 |
| 15               | 1                | 0              | 2.165962                | 1.375378  | 0.030204  |
| 16               | 8                | 0              | 2.838341                | -2.116195 | 0.039205  |
| 17               | 1                | 0              | 2.167163                | -1.375504 | -0.030878 |
| 18               | 1                | 0              | 3.364165                | -1.866836 | 0.807871  |

Rotational constants (GHZ):      2.0697234      0.8518192      0.6062176

### Thymol

Electronic Energy -617.680335

Stoichiometry C<sub>10</sub>H<sub>18</sub>O<sub>3</sub>

Framework group C1[X(C<sub>10</sub>H<sub>18</sub>O<sub>3</sub>)]

Deg. of freedom 87

Full point group C1 NOp 1

Largest Abelian subgroup C1 NOp 1

Largest concise Abelian subgroup C1 NOp 1

Standard orientation:

| Center<br>Number | Atomic<br>Number | Atomic<br>Type | Coordinates (Angstroms) |           |           |
|------------------|------------------|----------------|-------------------------|-----------|-----------|
|                  |                  |                | X                       | Y         | Z         |
| 1                | 6                | 0              | -1.049580               | -2.013902 | -0.196597 |
| 2                | 1                | 0              | -0.049476               | -2.347969 | -0.488169 |

|    |   |   |           |           |           |
|----|---|---|-----------|-----------|-----------|
| 3  | 6 | 0 | -1.000795 | -0.495535 | -0.074709 |
| 4  | 6 | 0 | -2.141864 | 0.254165  | 0.240651  |
| 5  | 6 | 0 | 0.190272  | 0.223007  | -0.282770 |
| 6  | 6 | 0 | -2.116637 | 1.645953  | 0.342342  |
| 7  | 1 | 0 | -3.082955 | -0.264964 | 0.403831  |
| 8  | 6 | 0 | 0.226551  | 1.619244  | -0.181821 |
| 9  | 6 | 0 | -0.924071 | 2.350740  | 0.131824  |
| 10 | 1 | 0 | -3.028998 | 2.185677  | 0.582512  |
| 11 | 1 | 0 | 1.170341  | 2.134093  | -0.348823 |
| 12 | 6 | 0 | -2.022617 | -2.470210 | -1.301688 |
| 13 | 1 | 0 | -1.993764 | -3.560416 | -1.412559 |
| 14 | 1 | 0 | -3.055808 | -2.187129 | -1.069608 |
| 15 | 1 | 0 | -1.761799 | -2.022502 | -2.266078 |
| 16 | 6 | 0 | -1.391430 | -2.684026 | 1.149436  |
| 17 | 1 | 0 | -1.364178 | -3.775889 | 1.055269  |
| 18 | 1 | 0 | -0.681903 | -2.391797 | 1.931179  |
| 19 | 1 | 0 | -2.394415 | -2.403717 | 1.491513  |
| 20 | 6 | 0 | -0.866860 | 3.855110  | 0.269617  |
| 21 | 1 | 0 | -0.585591 | 4.148322  | 1.289174  |
| 22 | 1 | 0 | -0.128806 | 4.292581  | -0.410209 |
| 23 | 1 | 0 | -1.838279 | 4.311096  | 0.054814  |
| 24 | 8 | 0 | 1.332622  | -0.482824 | -0.590218 |
| 25 | 1 | 0 | 2.076442  | 0.124093  | -0.800727 |
| 26 | 8 | 0 | 3.474478  | -1.466621 | 1.000484  |
| 27 | 1 | 0 | 2.555491  | -1.410398 | 0.675304  |
| 28 | 1 | 0 | 3.427811  | -1.534078 | 1.961555  |
| 29 | 8 | 0 | 3.798169  | 0.733876  | -0.644227 |
| 30 | 1 | 0 | 4.446545  | 0.686001  | -1.356779 |
| 31 | 1 | 0 | 4.029384  | 0.034266  | 0.001773  |

-----

|                             |           |           |           |
|-----------------------------|-----------|-----------|-----------|
| Rotational constants (GHZ): | 0.6449740 | 0.5728722 | 0.3422173 |
|-----------------------------|-----------|-----------|-----------|

#### Thymolate

Electronic Energy -617.210138

Stoichiometry C10H17O3(1-)

Framework group C1[X(C10H17O3)]

Deg. of freedom 84

Full point group C1 NOp 1

Largest Abelian subgroup C1 NOp 1

Largest concise Abelian subgroup C1 NOp 1

Standard orientation:

| Center<br>Number | Atomic<br>Number | Atomic<br>Type | Coordinates (Angstroms) |           |           |
|------------------|------------------|----------------|-------------------------|-----------|-----------|
|                  |                  |                | X                       | Y         | Z         |
| 1                | 6                | 0              | 0.844972                | 1.937787  | -0.155380 |
| 2                | 1                | 0              | 1.614279                | 1.423451  | -0.745946 |
| 3                | 6                | 0              | -0.346040               | 0.993276  | -0.097665 |
| 4                | 6                | 0              | -1.669608               | 1.431961  | -0.120803 |
| 5                | 6                | 0              | -0.076939               | -0.419556 | 0.015968  |
| 6                | 6                | 0              | -2.760463               | 0.551747  | -0.039666 |
| 7                | 1                | 0              | -1.875039               | 2.497877  | -0.204106 |
| 8                | 6                | 0              | -1.206026               | -1.288345 | 0.092060  |
| 9                | 6                | 0              | -2.523682               | -0.826698 | 0.064877  |
| 10               | 1                | 0              | -3.778142               | 0.937276  | -0.059433 |
| 11               | 1                | 0              | -1.004483               | -2.354346 | 0.186416  |
| 12               | 6                | 0              | 1.446015                | 2.160242  | 1.249716  |
| 13               | 1                | 0              | 2.363880                | 2.762147  | 1.197143  |
| 14               | 1                | 0              | 0.728837                | 2.683784  | 1.896122  |
| 15               | 1                | 0              | 1.693310                | 1.200785  | 1.711680  |
| 16               | 6                | 0              | 0.557118                | 3.286053  | -0.834542 |
| 17               | 1                | 0              | 1.484369                | 3.864064  | -0.937450 |
| 18               | 1                | 0              | 0.128096                | 3.148903  | -1.834054 |
| 19               | 1                | 0              | -0.142945               | 3.898405  | -0.251159 |
| 20               | 6                | 0              | -3.678700               | -1.807081 | 0.114443  |
| 21               | 1                | 0              | -3.904500               | -2.215267 | -0.880920 |
| 22               | 1                | 0              | -3.453562               | -2.658219 | 0.767819  |
| 23               | 1                | 0              | -4.593055               | -1.328556 | 0.485332  |
| 24               | 8                | 0              | 1.141105                | -0.877420 | 0.049496  |
| 25               | 8                | 0              | 2.038575                | -3.343561 | -0.155690 |
| 26               | 1                | 0              | 1.870612                | -3.558995 | -1.080473 |
| 27               | 1                | 0              | 1.587721                | -2.449558 | -0.025660 |

|    |   |   |          |           |           |
|----|---|---|----------|-----------|-----------|
| 28 | 8 | 0 | 3.940915 | -0.959349 | -0.119130 |
| 29 | 1 | 0 | 3.026578 | -0.611135 | -0.065156 |
| 30 | 1 | 0 | 3.769397 | -1.914290 | -0.091614 |

Rotational constants (GHZ): 0.7247502 0.5537282 0.3322523

#### Carvacrol

Electronic Energy -617.820125

Stoichiometry C10H18O3

Framework group C1[X(C10H18O3)]

Deg. of freedom 87

Full point group C1 NOp 1

Largest Abelian subgroup C1 NOp 1

Largest concise Abelian subgroup C1 NOp 1

Standard orientation:

| Center<br>Number | Atomic<br>Number | Atomic<br>Type | Coordinates (Angstroms) |           |           |
|------------------|------------------|----------------|-------------------------|-----------|-----------|
|                  |                  |                | X                       | Y         | Z         |
| 1                | 6                | 0              | -0.601130               | 1.503064  | 0.108323  |
| 2                | 6                | 0              | -0.651752               | 0.153483  | -0.269028 |
| 3                | 6                | 0              | 0.506202                | -0.622778 | -0.347645 |
| 4                | 6                | 0              | 1.760049                | -0.084651 | -0.052791 |
| 5                | 6                | 0              | 1.823654                | 1.263167  | 0.325979  |
| 6                | 6                | 0              | 0.663067                | 2.029581  | 0.400696  |
| 7                | 1                | 0              | 2.778417                | 1.719425  | 0.562674  |
| 8                | 8                | 0              | -1.834470               | -0.482475 | -0.590818 |
| 9                | 1                | 0              | -2.620200               | 0.084332  | -0.477170 |
| 10               | 8                | 0              | -3.542546               | -2.469731 | 0.633214  |
| 11               | 1                | 0              | -3.658614               | -3.268532 | 0.103847  |
| 12               | 1                | 0              | -2.747914               | -2.041902 | 0.270599  |
| 13               | 8                | 0              | -4.620369               | 0.043331  | -0.210467 |
| 14               | 1                | 0              | -4.498961               | -0.892749 | 0.037880  |
| 15               | 1                | 0              | -5.140192               | 0.023045  | -1.023377 |
| 16               | 1                | 0              | 0.730730                | 3.072510  | 0.694419  |
| 17               | 1                | 0              | 0.413074                | -1.662302 | -0.645421 |
| 18               | 6                | 0              | -1.844813               | 2.350133  | 0.196711  |
| 19               | 1                | 0              | -2.383586               | 2.381893  | -0.756518 |
| 20               | 1                | 0              | -2.543064               | 1.968359  | 0.949064  |
| 21               | 1                | 0              | -1.587716               | 3.374859  | 0.469510  |
| 22               | 6                | 0              | 3.008714                | -0.949834 | -0.145701 |
| 23               | 1                | 0              | 2.682752                | -1.947120 | -0.459368 |
| 24               | 6                | 0              | 3.989973                | -0.424499 | -1.207600 |
| 25               | 1                | 0              | 4.848372                | -1.097093 | -1.299515 |
| 26               | 1                | 0              | 3.511661                | -0.350296 | -2.188479 |
| 27               | 1                | 0              | 4.368636                | 0.566744  | -0.940186 |
| 28               | 6                | 0              | 3.706479                | -1.094503 | 1.217612  |
| 29               | 1                | 0              | 3.025635                | -1.500702 | 1.971186  |
| 30               | 1                | 0              | 4.564071                | -1.769618 | 1.137443  |
| 31               | 1                | 0              | 4.073325                | -0.128822 | 1.578642  |

Rotational constants (GHZ): 1.1679865 0.3419093 0.2867066

#### Carvacrolate

Electronic Energy -617.353212

Stoichiometry C10H17O3(1-)

Framework group C1[X(C10H17O3)]

Deg. of freedom 84

Full point group C1 NOp 1

Largest Abelian subgroup C1 NOp 1

Largest concise Abelian subgroup C1 NOp 1

Standard orientation:

| Center<br>Number | Atomic<br>Number | Atomic<br>Type | Coordinates (Angstroms) |           |           |
|------------------|------------------|----------------|-------------------------|-----------|-----------|
|                  |                  |                | X                       | Y         | Z         |
| 1                | 6                | 0              | 0.857887                | -1.552212 | -0.234259 |
| 2                | 6                | 0              | 0.918941                | -0.131993 | -0.328789 |
| 3                | 6                | 0              | -0.293404               | 0.590540  | -0.206422 |
| 4                | 6                | 0              | -1.528196               | -0.027148 | 0.004813  |
| 5                | 6                | 0              | -1.565909               | -1.425337 | 0.098242  |
| 6                | 6                | 0              | -0.382498               | -2.158209 | -0.023499 |

|    |   |   |           |           |           |
|----|---|---|-----------|-----------|-----------|
| 7  | 1 | 0 | -2.504954 | -1.943313 | 0.260603  |
| 8  | 8 | 0 | 2.071613  | 0.494594  | -0.533614 |
| 9  | 8 | 0 | 4.142312  | 0.317477  | 1.150307  |
| 10 | 1 | 0 | 4.401350  | -0.608645 | 1.220458  |
| 11 | 1 | 0 | 3.360817  | 0.314724  | 0.532555  |
| 12 | 8 | 0 | 2.276015  | 3.153086  | -0.470280 |
| 13 | 1 | 0 | 2.161354  | 2.159527  | -0.484301 |
| 14 | 1 | 0 | 3.166560  | 3.294618  | -0.128942 |
| 15 | 1 | 0 | -0.246311 | 1.673647  | -0.282029 |
| 16 | 1 | 0 | -0.423545 | -3.242478 | 0.045066  |
| 17 | 6 | 0 | 2.113921  | -2.374989 | -0.369963 |
| 18 | 1 | 0 | 2.643486  | -2.153327 | -1.303077 |
| 19 | 1 | 0 | 2.822315  | -2.179378 | 0.443112  |
| 20 | 1 | 0 | 1.881120  | -3.442578 | -0.358806 |
| 21 | 6 | 0 | -2.793845 | 0.813502  | 0.124075  |
| 22 | 1 | 0 | -2.488842 | 1.862010  | 0.037020  |
| 23 | 6 | 0 | -3.476033 | 0.641247  | 1.492128  |
| 24 | 1 | 0 | -2.789726 | 0.877030  | 2.310760  |
| 25 | 1 | 0 | -4.342090 | 1.305636  | 1.575656  |
| 26 | 1 | 0 | -3.828463 | -0.385225 | 1.632680  |
| 27 | 6 | 0 | -3.785692 | 0.523428  | -1.015977 |
| 28 | 1 | 0 | -4.655447 | 1.184673  | -0.946621 |
| 29 | 1 | 0 | -3.321712 | 0.677758  | -1.994580 |
| 30 | 1 | 0 | -4.146476 | -0.508916 | -0.972951 |

Rotational constants (GHZ):      0.9754935      0.4102434      0.3233110

### 2,3-dimethylphenol

Electronic Energy -539.171228

Stoichiometry C<sub>8</sub>H<sub>14</sub>O<sub>3</sub>

Framework group C1[X(C<sub>8</sub>H<sub>14</sub>O<sub>3</sub>)]

Deg. of freedom 69

Full point group C1 NOp 1

Largest Abelian subgroup C1 NOp 1

Largest concise Abelian subgroup C1 NOp 1

Standard orientation:

| Center<br>Number | Atomic<br>Number | Atomic<br>Type | Coordinates (Angstroms) |           |           |
|------------------|------------------|----------------|-------------------------|-----------|-----------|
|                  |                  |                | X                       | Y         | Z         |
| 1                | 6                | 0              | 0.836349                | 0.574545  | -0.111473 |
| 2                | 6                | 0              | -0.006242               | -0.534418 | -0.296627 |
| 3                | 6                | 0              | 0.480558                | -1.841620 | -0.269960 |
| 4                | 6                | 0              | 1.834095                | -2.059548 | -0.042514 |
| 5                | 6                | 0              | 2.688625                | -0.977377 | 0.160123  |
| 6                | 6                | 0              | 2.206243                | 0.336755  | 0.130029  |
| 7                | 1                | 0              | 2.220814                | -3.072324 | -0.018307 |
| 8                | 1                | 0              | 3.743428                | -1.148904 | 0.345108  |
| 9                | 8                | 0              | -1.359923               | -0.396979 | -0.531087 |
| 10               | 1                | 0              | -1.686725               | 0.512505  | -0.397545 |
| 11               | 8                | 0              | -3.872111               | -1.132349 | 0.681172  |
| 12               | 1                | 0              | -4.454342               | -1.635904 | 0.098589  |
| 13               | 1                | 0              | -2.987757               | -1.212765 | 0.284162  |
| 14               | 8                | 0              | -3.328320               | 1.594875  | 0.018982  |
| 15               | 1                | 0              | -3.750164               | 0.743281  | 0.243233  |
| 16               | 1                | 0              | -3.800876               | 1.910914  | -0.761050 |
| 17               | 1                | 0              | -0.207204               | -2.665434 | -0.422810 |
| 18               | 6                | 0              | 0.262836                | 1.970019  | -0.167169 |
| 19               | 1                | 0              | -0.406612               | 2.092834  | -1.024139 |
| 20               | 1                | 0              | -0.317074               | 2.203038  | 0.733065  |
| 21               | 1                | 0              | 1.044079                | 2.722802  | -0.256263 |
| 22               | 6                | 0              | 3.167790                | 1.479630  | 0.358778  |
| 23               | 1                | 0              | 3.223848                | 2.142819  | -0.510276 |
| 24               | 1                | 0              | 2.868135                | 2.095769  | 1.212059  |
| 25               | 1                | 0              | 4.171755                | 1.099078  | 0.554513  |

Rotational constants (GHZ):      1.5642966      0.5594339      0.4268884

### 2,3-dimethylphenolate

Electronic Energy -538.704374

Stoichiometry C<sub>8</sub>H<sub>13</sub>O<sub>3</sub>(1-)

Framework group C1[X(C<sub>8</sub>H<sub>13</sub>O<sub>3</sub>)]

Deg. of freedom 66  
 Full point group C1 NOp 1  
 Largest Abelian subgroup C1 NOp 1  
 Largest concise Abelian subgroup C1 NOp 1  
 Standard orientation:

| Center<br>Number            | Atomic<br>Number | Atomic<br>Type | Coordinates (Angstroms) |           |           |
|-----------------------------|------------------|----------------|-------------------------|-----------|-----------|
|                             |                  |                | X                       | Y         | Z         |
| 1                           | 6                | 0              | 0.122245                | -1.637449 | 0.396652  |
| 2                           | 6                | 0              | 0.355411                | -0.306969 | -0.027855 |
| 3                           | 6                | 0              | -0.774905               | 0.532203  | -0.265716 |
| 4                           | 6                | 0              | -2.075342               | 0.039108  | -0.049854 |
| 5                           | 6                | 0              | -2.267369               | -1.283100 | 0.377935  |
| 6                           | 6                | 0              | -1.168303               | -2.114811 | 0.594112  |
| 7                           | 1                | 0              | 0.979412                | -2.279262 | 0.574202  |
| 8                           | 1                | 0              | -3.274581               | -1.652405 | 0.540396  |
| 9                           | 8                | 0              | 1.595606                | 0.138395  | -0.197997 |
| 10                          | 8                | 0              | 3.605322                | -1.492182 | -0.783774 |
| 11                          | 1                | 0              | 3.689031                | -1.456519 | -1.743451 |
| 12                          | 1                | 0              | 2.818726                | -0.911390 | -0.568538 |
| 13                          | 8                | 0              | 2.541764                | 2.237813  | 1.143459  |
| 14                          | 1                | 0              | 2.159235                | 1.458247  | 0.652231  |
| 15                          | 1                | 0              | 3.140010                | 1.851932  | 1.793457  |
| 16                          | 1                | 0              | -1.319315               | -3.138353 | 0.924076  |
| 17                          | 6                | 0              | -0.551973               | 1.949688  | -0.736965 |
| 18                          | 1                | 0              | -0.522733               | 2.660089  | 0.099137  |
| 19                          | 1                | 0              | 0.398843                | 2.039610  | -1.264564 |
| 20                          | 1                | 0              | -1.345724               | 2.282651  | -1.409406 |
| 21                          | 6                | 0              | -3.283054               | 0.922214  | -0.271433 |
| 22                          | 1                | 0              | -3.235594               | 1.834000  | 0.332918  |
| 23                          | 1                | 0              | -3.367625               | 1.241133  | -1.315906 |
| 24                          | 1                | 0              | -4.201482               | 0.392755  | -0.009309 |
| Rotational constants (GHZ): |                  |                | 1.2911874               | 0.6504205 | 0.4833657 |

## 2,4-dimethylphenol

Electronic Energy -539.172676  
 Stoichiometry C8H14O3  
 Framework group C1[X(C8H14O3)]  
 Deg. of freedom 69  
 Full point group C1 NOp 1  
 Largest Abelian subgroup C1 NOp 1  
 Largest concise Abelian subgroup C1 NOp 1  
 Standard orientation:

| Center<br>Number | Atomic<br>Number | Atomic<br>Type | Coordinates (Angstroms) |           |           |
|------------------|------------------|----------------|-------------------------|-----------|-----------|
|                  |                  |                | X                       | Y         | Z         |
| 1                | 6                | 0              | 0.541981                | 0.968894  | -0.071812 |
| 2                | 6                | 0              | -0.075518               | -0.264959 | -0.331351 |
| 3                | 6                | 0              | 0.673489                | -1.438978 | -0.381888 |
| 4                | 6                | 0              | 2.049162                | -1.402610 | -0.166517 |
| 5                | 6                | 0              | 2.700835                | -0.195751 | 0.106548  |
| 6                | 6                | 0              | 1.924943                | 0.968273  | 0.143272  |
| 7                | 1                | 0              | 2.618370                | -2.325447 | -0.211370 |
| 8                | 8                | 0              | -1.431176               | -0.381232 | -0.573873 |
| 9                | 1                | 0              | -1.929631               | 0.431882  | -0.367950 |
| 10               | 8                | 0              | -3.693600               | -1.672957 | 0.640052  |
| 11               | 1                | 0              | -4.176863               | -2.261205 | 0.046526  |
| 12               | 1                | 0              | -2.828271               | -1.540884 | 0.214811  |
| 13               | 8                | 0              | -3.733284               | 1.148433  | 0.146235  |
| 14               | 1                | 0              | -3.977515               | 0.220625  | 0.326400  |
| 15               | 1                | 0              | -4.272664               | 1.406615  | -0.611399 |
| 16               | 1                | 0              | 2.410352                | 1.919509  | 0.342458  |
| 17               | 1                | 0              | 0.169766                | -2.375828 | -0.593248 |
| 18               | 6                | 0              | -0.249683               | 2.251346  | -0.034231 |
| 19               | 1                | 0              | -0.788060               | 2.420640  | -0.972916 |
| 20               | 1                | 0              | -0.995510               | 2.242795  | 0.767568  |
| 21               | 1                | 0              | 0.411268                | 3.102933  | 0.133266  |
| 22               | 6                | 0              | 4.184945                | -0.149748 | 0.378911  |
| 23               | 1                | 0              | 4.627859                | 0.781820  | 0.017691  |

|    |   |   |          |           |           |
|----|---|---|----------|-----------|-----------|
| 24 | 1 | 0 | 4.392535 | -0.212622 | 1.453208  |
| 25 | 1 | 0 | 4.701916 | -0.983603 | -0.101945 |

Rotational constants (GHZ): 1.8646861 0.4857021 0.3990726

#### 2,4-dimethylphenolate

Electronic Energy -538.705545

Stoichiometry C<sub>8</sub>H<sub>13</sub>O<sub>3</sub>(1-)

Framework group C1[X(C<sub>8</sub>H<sub>13</sub>O<sub>3</sub>)]

Deg. of freedom 66

Full point group C1 NOp 1

Largest Abelian subgroup C1 NOp 1

Largest concise Abelian subgroup C1 NOp 1

Standard orientation:

| Center<br>Number | Atomic<br>Number | Atomic<br>Type | Coordinates (Angstroms) |           |           |
|------------------|------------------|----------------|-------------------------|-----------|-----------|
|                  |                  |                | X                       | Y         | Z         |
| 1                | 6                | 0              | -0.215692               | -1.309324 | 0.157490  |
| 2                | 6                | 0              | 0.390348                | -0.089208 | -0.212647 |
| 3                | 6                | 0              | -0.466031               | 1.037067  | -0.393876 |
| 4                | 6                | 0              | -1.840595               | 0.894209  | -0.201152 |
| 5                | 6                | 0              | -2.440218               | -0.320313 | 0.167761  |
| 6                | 6                | 0              | -1.595508               | -1.419218 | 0.341399  |
| 7                | 1                | 0              | 0.418799                | -2.179269 | 0.300033  |
| 8                | 1                | 0              | -2.473095               | 1.767480  | -0.346770 |
| 9                | 8                | 0              | 1.704770                | 0.014421  | -0.390867 |
| 10               | 8                | 0              | 3.201920                | -2.157093 | -0.669584 |
| 11               | 1                | 0              | 2.759617                | -2.888687 | -0.223930 |
| 12               | 1                | 0              | 2.593010                | -1.371351 | -0.539304 |
| 13               | 8                | 0              | 3.152524                | 1.418009  | 1.367529  |
| 14               | 1                | 0              | 2.596973                | 0.900873  | 0.721637  |
| 15               | 1                | 0              | 3.639855                | 0.751744  | 1.865568  |
| 16               | 1                | 0              | -2.017583               | -2.379211 | 0.626566  |
| 17               | 6                | 0              | 0.125671                | 2.362776  | -0.798483 |
| 18               | 1                | 0              | 0.835865                | 2.735208  | -0.052433 |
| 19               | 1                | 0              | 0.678819                | 2.285335  | -1.741139 |
| 20               | 1                | 0              | -0.655482               | 3.116015  | -0.925295 |
| 21               | 6                | 0              | -3.934247               | -0.422055 | 0.370351  |
| 22               | 1                | 0              | -4.278047               | 0.223973  | 1.185882  |
| 23               | 1                | 0              | -4.486695               | -0.122479 | -0.526816 |
| 24               | 1                | 0              | -4.228126               | -1.445939 | 0.614323  |

Rotational constants (GHZ): 1.4073639 0.5803614 0.4590803

#### 2,6-diisopropylphenol

Electronic Energy -696.094271

Stoichiometry C<sub>12</sub>H<sub>22</sub>O<sub>3</sub>

Framework group C1[X(C<sub>12</sub>H<sub>22</sub>O<sub>3</sub>)]

Deg. of freedom 105

Full point group C1 NOp 1

Largest Abelian subgroup C1 NOp 1

Largest concise Abelian subgroup C1 NOp 1

Standard orientation:

| Center<br>Number | Atomic<br>Number | Atomic<br>Type | Coordinates (Angstroms) |           |           |
|------------------|------------------|----------------|-------------------------|-----------|-----------|
|                  |                  |                | X                       | Y         | Z         |
| 1                | 6                | 0              | 1.117396                | -1.021888 | -0.079110 |
| 2                | 6                | 0              | -0.059336               | -0.266160 | -0.133653 |
| 3                | 6                | 0              | -1.329336               | -0.855185 | -0.117149 |
| 4                | 6                | 0              | -1.401326               | -2.240179 | -0.035297 |
| 5                | 6                | 0              | -0.253509               | -3.015761 | 0.023384  |
| 6                | 6                | 0              | 0.989566                | -2.405927 | -0.001396 |
| 7                | 1                | 0              | -2.369126               | -2.724927 | -0.026571 |
| 8                | 1                | 0              | -0.328227               | -4.094759 | 0.082251  |
| 9                | 8                | 0              | -0.028055               | 1.102016  | -0.199083 |
| 10               | 1                | 0              | 0.856668                | 1.476925  | -0.359194 |
| 11               | 8                | 0              | -0.845787               | 3.742564  | -0.106490 |
| 12               | 1                | 0              | -1.323768               | 4.110059  | 0.640522  |
| 13               | 1                | 0              | -0.937047               | 2.776469  | -0.053148 |
| 14               | 8                | 0              | 1.790018                | 3.110565  | -0.526348 |



|    |   |   |           |           |           |
|----|---|---|-----------|-----------|-----------|
| 15 | 1 | 0 | 0.979678  | 3.636725  | -0.389644 |
| 16 | 1 | 0 | 2.242963  | 3.489411  | -1.283117 |
| 17 | 1 | 0 | 1.879523  | -3.020594 | 0.037492  |
| 18 | 6 | 0 | -2.562322 | 0.028687  | -0.162134 |
| 19 | 1 | 0 | -2.332222 | 0.856323  | -0.839066 |
| 20 | 6 | 0 | -2.850961 | 0.624183  | 1.223221  |
| 21 | 1 | 0 | -1.977828 | 1.140753  | 1.625810  |
| 22 | 1 | 0 | -3.682729 | 1.332694  | 1.176710  |
| 23 | 1 | 0 | -3.121409 | -0.165945 | 1.928736  |
| 24 | 6 | 0 | -3.805197 | -0.671816 | -0.708622 |
| 25 | 1 | 0 | -4.617238 | 0.049475  | -0.825344 |
| 26 | 1 | 0 | -3.615120 | -1.126653 | -1.682882 |
| 27 | 1 | 0 | -4.162477 | -1.452961 | -0.032885 |
| 28 | 6 | 0 | 2.473554  | -0.336215 | -0.057428 |
| 29 | 1 | 0 | 2.429318  | 0.529117  | -0.727970 |
| 30 | 6 | 0 | 2.794371  | 0.187419  | 1.349601  |
| 31 | 1 | 0 | 3.736090  | 0.741235  | 1.350524  |
| 32 | 1 | 0 | 2.015256  | 0.854872  | 1.720588  |
| 33 | 1 | 0 | 2.885139  | -0.647045 | 2.049844  |
| 34 | 6 | 0 | 3.614746  | -1.212547 | -0.573334 |
| 35 | 1 | 0 | 3.393276  | -1.624325 | -1.560020 |
| 36 | 1 | 0 | 4.529934  | -0.621354 | -0.649150 |
| 37 | 1 | 0 | 3.824061  | -2.044314 | 0.103391  |

Rotational constants (GHZ):      0.5782226      0.4700602      0.2833303

## 2,6-diisopropylphenolate

Electronic Energy -695.625109

Stoichiometry C12H21O3(1-)

Framework group C1[X(C12H21O3)]

Deg. of freedom 102

Full point group C1 NOp 1

Largest Abelian subgroup C1 NOp 1

Largest concise Abelian subgroup C1 NOp 1

Standard orientation:

| Center<br>Number | Atomic<br>Number | Atomic<br>Type | Coordinates (Angstroms) |           |           |
|------------------|------------------|----------------|-------------------------|-----------|-----------|
|                  |                  |                | X                       | Y         | Z         |
| 1                | 6                | 0              | 1.358986                | -0.756285 | -0.046465 |
| 2                | 6                | 0              | 0.069902                | -0.140274 | -0.060458 |
| 3                | 6                | 0              | -1.075140               | -0.989154 | -0.116270 |
| 4                | 6                | 0              | -0.913596               | -2.367445 | -0.131883 |
| 5                | 6                | 0              | 0.343743                | -2.959020 | -0.105504 |
| 6                | 6                | 0              | 1.466768                | -2.138370 | -0.066545 |
| 7                | 1                | 0              | -1.791396               | -3.005336 | -0.173193 |
| 8                | 1                | 0              | 0.448086                | -4.038291 | -0.124417 |
| 9                | 8                | 0              | -0.037165               | 1.153091  | -0.028665 |
| 10               | 8                | 0              | 0.475970                | 3.387682  | -1.575367 |
| 11               | 1                | 0              | -0.276447               | 3.771058  | -1.108414 |
| 12               | 1                | 0              | 0.496613                | 2.494700  | -1.174380 |
| 13               | 8                | 0              | -1.556722               | 3.193460  | 0.641465  |
| 14               | 1                | 0              | -1.095562               | 2.337698  | 0.420597  |
| 15               | 1                | 0              | -1.091015               | 3.512232  | 1.417104  |
| 16               | 1                | 0              | 2.450004                | -2.597917 | -0.057373 |
| 17               | 6                | 0              | -2.442748               | -0.336507 | -0.121060 |
| 18               | 1                | 0              | -2.314434               | 0.637401  | -0.599861 |
| 19               | 6                | 0              | -3.500267               | -1.109528 | -0.910583 |
| 20               | 1                | 0              | -3.747593               | -2.064541 | -0.436667 |
| 21               | 1                | 0              | -4.425839               | -0.528872 | -0.971796 |
| 22               | 1                | 0              | -3.160930               | -1.318845 | -1.927934 |
| 23               | 6                | 0              | -2.930358               | -0.075407 | 1.309879  |
| 24               | 1                | 0              | -2.195516               | 0.509126  | 1.864194  |
| 25               | 1                | 0              | -3.872849               | 0.481806  | 1.311803  |
| 26               | 1                | 0              | -3.086065               | -1.022011 | 1.838593  |
| 27               | 6                | 0              | 2.564827                | 0.159850  | 0.019909  |
| 28               | 1                | 0              | 2.342548                | 1.010051  | -0.631513 |
| 29               | 6                | 0              | 3.867579                | -0.475265 | -0.463948 |
| 30               | 1                | 0              | 4.664041                | 0.274433  | -0.491037 |
| 31               | 1                | 0              | 4.200172                | -1.278790 | 0.200896  |
| 32               | 1                | 0              | 3.760883                | -0.893502 | -1.468011 |
| 33               | 6                | 0              | 2.739383                | 0.727475  | 1.434553  |

|    |   |   |          |           |          |
|----|---|---|----------|-----------|----------|
| 34 | 1 | 0 | 3.553397 | 1.460086  | 1.467975 |
| 35 | 1 | 0 | 1.819589 | 1.219667  | 1.750628 |
| 36 | 1 | 0 | 2.971170 | -0.074433 | 2.143591 |

Rotational constants (GHZ):      0.5861723      0.4602902      0.2994736

#### 2-methyl-4-terz-butylphenol

Electronic Energy -657.139992

Stoichiometry C11H20O3

Framework group C1[X(C11H20O3)]

Deg. of freedom 96

Full point group C1 NOp 1

Largest Abelian subgroup C1 NOp 1

Largest concise Abelian subgroup C1 NOp 1

Standard orientation:

| Center<br>Number | Atomic<br>Number | Atomic<br>Type | Coordinates (Angstroms) |           |           |
|------------------|------------------|----------------|-------------------------|-----------|-----------|
|                  |                  |                | X                       | Y         | Z         |
| 1                | 6                | 0              | 1.011335                | -1.329020 | -0.310999 |
| 2                | 6                | 0              | -0.366608               | -1.397576 | -0.479987 |
| 3                | 6                | 0              | -1.144737               | -0.243495 | -0.390352 |
| 4                | 6                | 0              | -0.546974               | 0.996550  | -0.135486 |
| 5                | 6                | 0              | 0.845407                | 1.028335  | 0.033314  |
| 6                | 6                | 0              | 1.654779                | -0.109960 | -0.045784 |
| 7                | 1                | 0              | 1.586300                | -2.244882 | -0.386035 |
| 8                | 1                | 0              | -0.852801               | -2.345932 | -0.681532 |
| 9                | 1                | 0              | 1.291304                | 1.995428  | 0.230817  |
| 10               | 8                | 0              | -2.504603               | -0.393274 | -0.583932 |
| 11               | 1                | 0              | -3.014594               | 0.408570  | -0.362385 |
| 12               | 8                | 0              | -4.814791               | 1.091376  | 0.201447  |
| 13               | 1                | 0              | -5.381258               | 1.332259  | -0.541906 |
| 14               | 1                | 0              | -5.034126               | 0.160216  | 0.395731  |
| 15               | 8                | 0              | -4.697816               | -1.722300 | 0.725095  |
| 16               | 1                | 0              | -3.847238               | -1.577001 | 0.275377  |
| 17               | 1                | 0              | -5.182283               | -2.329829 | 0.152318  |
| 18               | 6                | 0              | 3.182241                | -0.067727 | 0.140933  |
| 19               | 6                | 0              | 3.697558                | 1.351518  | 0.435269  |
| 20               | 1                | 0              | 3.266243                | 1.759773  | 1.353769  |
| 21               | 1                | 0              | 4.783489                | 1.323933  | 0.562445  |
| 22               | 1                | 0              | 3.477102                | 2.043565  | -0.382476 |
| 23               | 6                | 0              | 3.583199                | -0.980156 | 1.322115  |
| 24               | 1                | 0              | 3.286058                | -2.017823 | 1.150719  |
| 25               | 1                | 0              | 4.668752                | -0.961426 | 1.462051  |
| 26               | 1                | 0              | 3.116047                | -0.643065 | 2.252512  |
| 27               | 6                | 0              | 3.873585                | -0.574682 | -1.144949 |
| 28               | 1                | 0              | 3.582187                | -1.600909 | -1.382653 |
| 29               | 1                | 0              | 3.618318                | 0.057169  | -2.001171 |
| 30               | 1                | 0              | 4.961187                | -0.555182 | -1.021747 |
| 31               | 6                | 0              | -1.364653               | 2.260714  | -0.047861 |
| 32               | 1                | 0              | -1.952288               | 2.425302  | -0.957424 |
| 33               | 1                | 0              | -2.069792               | 2.230161  | 0.789565  |
| 34               | 1                | 0              | -0.715726               | 3.126249  | 0.093861  |

Rotational constants (GHZ):      1.3255978      0.2688096      0.2406409

#### 2-methyl-4-terz-butylphenolate

Electronic Energy -656.672780

Stoichiometry C11H19O3(1-)

Framework group C1[X(C11H19O3)]

Deg. of freedom 93

Full point group C1 NOp 1

Largest Abelian subgroup C1 NOp 1

Largest concise Abelian subgroup C1 NOp 1

Standard orientation:

| Center<br>Number | Atomic<br>Number | Atomic<br>Type | Coordinates (Angstroms) |           |           |
|------------------|------------------|----------------|-------------------------|-----------|-----------|
|                  |                  |                | X                       | Y         | Z         |
| 1                | 6                | 0              | 0.672512                | -1.295363 | 0.274298  |
| 2                | 6                | 0              | -0.720058               | -1.258871 | 0.167192  |
| 3                | 6                | 0              | -1.410736               | -0.088208 | -0.206731 |

|    |   |   |           |           |           |
|----|---|---|-----------|-----------|-----------|
| 4  | 6 | 0 | -0.623595 | 1.069695  | -0.474924 |
| 5  | 6 | 0 | 0.764412  | 1.000927  | -0.356467 |
| 6  | 6 | 0 | 1.456519  | -0.166128 | 0.016227  |
| 7  | 1 | 0 | 1.136128  | -2.230100 | 0.566985  |
| 8  | 1 | 0 | -1.297251 | -2.154407 | 0.377684  |
| 9  | 1 | 0 | 1.328440  | 1.904942  | -0.568728 |
| 10 | 8 | 0 | -2.737289 | -0.056197 | -0.309305 |
| 11 | 8 | 0 | -4.131366 | 1.290908  | 1.534332  |
| 12 | 1 | 0 | -4.400333 | 0.623621  | 2.176063  |
| 13 | 1 | 0 | -3.592155 | 0.795032  | 0.858552  |
| 14 | 8 | 0 | -4.173015 | -2.271645 | -0.575048 |
| 15 | 1 | 0 | -3.596170 | -1.457565 | -0.482742 |
| 16 | 1 | 0 | -4.495340 | -2.249429 | -1.483295 |
| 17 | 6 | 0 | 2.992122  | -0.155504 | 0.124816  |
| 18 | 6 | 0 | 3.433980  | 0.874434  | 1.189513  |
| 19 | 1 | 0 | 4.525938  | 0.894993  | 1.271384  |
| 20 | 1 | 0 | 3.098540  | 1.883668  | 0.936907  |
| 21 | 1 | 0 | 3.026004  | 0.619166  | 2.172504  |
| 22 | 6 | 0 | 3.556255  | -1.529339 | 0.527411  |
| 23 | 1 | 0 | 3.304498  | -2.303096 | -0.203689 |
| 24 | 1 | 0 | 4.647113  | -1.472924 | 0.588455  |
| 25 | 1 | 0 | 3.185865  | -1.851918 | 1.504745  |
| 26 | 6 | 0 | 3.612537  | 0.235579  | -1.235914 |
| 27 | 1 | 0 | 4.705372  | 0.252070  | -1.166325 |
| 28 | 1 | 0 | 3.334211  | -0.483143 | -2.012996 |
| 29 | 1 | 0 | 3.283802  | 1.226423  | -1.559841 |
| 30 | 6 | 0 | -1.301661 | 2.351334  | -0.888683 |
| 31 | 1 | 0 | -1.895719 | 2.216707  | -1.799543 |
| 32 | 1 | 0 | -1.992274 | 2.712415  | -0.119000 |
| 33 | 1 | 0 | -0.567033 | 3.137696  | -1.077383 |

-----  
Rotational constants (GHZ):        1.0743958        0.3051678        0.2706838

#### 4-bromothymol

Electronic Energy -3191.363864

Stoichiometry C10H17BrO3

Framework group C1[X(C10H17BrO3)]

Deg. of freedom 87

Full point group C1 NOp 1

Largest Abelian subgroup C1 NOp 1

Largest concise Abelian subgroup C1 NOp 1

Standard orientation:

| Center<br>Number | Atomic<br>Number | Atomic<br>Type | Coordinates (Angstroms) |           |           |
|------------------|------------------|----------------|-------------------------|-----------|-----------|
|                  |                  |                | X                       | Y         | Z         |
| 1                | 6                | 0              | -0.479437               | -1.410239 | -0.376846 |
| 2                | 6                | 0              | -1.205760               | -0.220334 | -0.322939 |
| 3                | 6                | 0              | -0.564934               | 1.011386  | -0.098614 |
| 4                | 6                | 0              | 0.822263                | 0.984554  | 0.059878  |
| 5                | 6                | 0              | 1.534470                | -0.209872 | -0.000227 |
| 6                | 6                | 0              | 0.910843                | -1.440918 | -0.218799 |
| 7                | 1                | 0              | -1.008628               | -2.341748 | -0.548827 |
| 8                | 1                | 0              | 1.355428                | 1.909527  | 0.235026  |
| 9                | 8                | 0              | -2.567552               | -0.218189 | -0.488983 |
| 10               | 1                | 0              | -2.915518               | -1.131274 | -0.599066 |
| 11               | 6                | 0              | -1.363876               | 2.307183  | -0.074760 |
| 12               | 1                | 0              | -2.342293               | 2.067251  | 0.352337  |
| 13               | 6                | 0              | -1.600703               | 2.823854  | -1.507828 |
| 14               | 1                | 0              | -2.085912               | 2.069627  | -2.132352 |
| 15               | 1                | 0              | -2.238733               | 3.712889  | -1.493348 |
| 16               | 1                | 0              | -0.651106               | 3.095828  | -1.979886 |
| 17               | 6                | 0              | -0.739134               | 3.404365  | 0.796301  |
| 18               | 1                | 0              | -1.420420               | 4.257718  | 0.856964  |
| 19               | 1                | 0              | -0.548774               | 3.052400  | 1.814204  |
| 20               | 1                | 0              | 0.204368                | 3.769896  | 0.380366  |
| 21               | 6                | 0              | 1.651456                | -2.749364 | -0.286971 |
| 22               | 1                | 0              | 2.185515                | -2.955081 | 0.645304  |
| 23               | 1                | 0              | 0.957254                | -3.570626 | -0.470201 |
| 24               | 1                | 0              | 2.395681                | -2.745223 | -1.088681 |
| 25               | 8                | 0              | -4.778145               | -0.691494 | 1.540629  |
| 26               | 1                | 0              | -4.003610               | -0.226252 | 1.187558  |

|    |    |   |           |           |           |
|----|----|---|-----------|-----------|-----------|
| 27 | 1  | 0 | -4.550969 | -0.891751 | 2.457549  |
| 28 | 8  | 0 | -4.008515 | -2.584261 | -0.418313 |
| 29 | 1  | 0 | -4.653257 | -2.676990 | -1.131110 |
| 30 | 1  | 0 | -4.479955 | -2.113957 | 0.297254  |
| 31 | 35 | 0 | 3.452671  | -0.123839 | 0.238145  |

Rotational constants (GHZ):            0.6155415            0.2459348            0.1910200

**4-bromothymolate**

Electronic Energy -3190.896942

Stoichiometry C10H16BrO3(1-)

Framework group C1[X(C10H16BrO3)]

Deg. of freedom 84

Full point group C1 NOp 1

Largest Abelian subgroup C1 NOp 1

Largest concise Abelian subgroup C1 NOp 1

Standard orientation:

| Center<br>Number | Atomic<br>Number | Atomic<br>Type | Coordinates (Angstroms) |           |           |
|------------------|------------------|----------------|-------------------------|-----------|-----------|
|                  |                  |                | X                       | Y         | Z         |
| 1                | 6                | 0              | 1.666010                | 2.096049  | -0.169124 |
| 2                | 1                | 0              | 2.596673                | 1.837263  | 0.345167  |
| 3                | 6                | 0              | 0.764060                | 0.873029  | -0.074813 |
| 4                | 6                | 0              | -0.625039               | 0.988365  | -0.026105 |
| 5                | 6                | 0              | 1.342397                | -0.433193 | -0.078120 |
| 6                | 6                | 0              | -1.448922               | -0.134707 | 0.021554  |
| 7                | 1                | 0              | -1.079262               | 1.971434  | -0.025629 |
| 8                | 6                | 0              | 0.465694                | -1.541592 | -0.020175 |
| 9                | 6                | 0              | -0.927981               | -1.431297 | 0.027260  |
| 10               | 1                | 0              | 0.905905                | -2.534524 | -0.014059 |
| 11               | 6                | 0              | 1.098268                | 3.350164  | 0.508644  |
| 12               | 1                | 0              | 1.845206                | 4.149614  | 0.497470  |
| 13               | 1                | 0              | 0.210235                | 3.728970  | -0.006676 |
| 14               | 1                | 0              | 0.827807                | 3.157789  | 1.551117  |
| 15               | 6                | 0              | 2.027893                | 2.397043  | -1.637278 |
| 16               | 1                | 0              | 2.743283                | 3.223824  | -1.698942 |
| 17               | 1                | 0              | 2.475259                | 1.527251  | -2.125346 |
| 18               | 1                | 0              | 1.134372                | 2.680930  | -2.203433 |
| 19               | 6                | 0              | -1.786036               | -2.668791 | 0.083343  |
| 20               | 1                | 0              | -2.467626               | -2.723936 | -0.770926 |
| 21               | 1                | 0              | -1.163199               | -3.564962 | 0.078913  |
| 22               | 1                | 0              | -2.404702               | -2.688644 | 0.985676  |
| 23               | 8                | 0              | 2.653753                | -0.612049 | -0.131886 |
| 24               | 8                | 0              | 3.648804                | -2.836545 | -1.203505 |
| 25               | 1                | 0              | 3.052478                | -3.561530 | -0.983837 |
| 26               | 1                | 0              | 3.231590                | -2.029013 | -0.787015 |
| 27               | 8                | 0              | 4.054694                | -0.289343 | 2.135449  |
| 28               | 1                | 0              | 3.518949                | -0.411076 | 1.306531  |
| 29               | 1                | 0              | 4.110035                | -1.168808 | 2.526592  |
| 30               | 35               | 0              | -3.367231               | 0.152528  | 0.088937  |

Rotational constants (GHZ):            0.6043836            0.2616458

**4-chlorothymol**

Electronic Energy -1077.443594

Stoichiometry C10H17ClO3

Framework group C1[X(C10H17ClO3)]

Deg. of freedom 87

Full point group C1 NOp 1

Largest Abelian subgroup C1 NOp 1

Largest concise Abelian subgroup C1 NOp 1

Standard orientation:

| Center<br>Number | Atomic<br>Number | Atomic<br>Type | Coordinates (Angstroms) |           |           |
|------------------|------------------|----------------|-------------------------|-----------|-----------|
|                  |                  |                | X                       | Y         | Z         |
| 1                | 6                | 0              | 0.050211                | -1.435408 | -0.316608 |
| 2                | 6                | 0              | -0.648695               | -0.227972 | -0.290553 |
| 3                | 6                | 0              | 0.014490                | 0.990607  | -0.059005 |
| 4                | 6                | 0              | 1.396132                | 0.933699  | 0.134295  |
| 5                | 6                | 0              | 2.079534                | -0.277415 | 0.101055  |

|    |    |   |           |           |           |
|----|----|---|-----------|-----------|-----------|
| 6  | 6  | 0 | 1.434180  | -1.495443 | -0.122834 |
| 7  | 1  | 0 | -0.495914 | -2.355798 | -0.494770 |
| 8  | 1  | 0 | 1.951685  | 1.844462  | 0.315898  |
| 9  | 8  | 0 | -2.005736 | -0.195831 | -0.492281 |
| 10 | 1  | 0 | -2.370077 | -1.101577 | -0.607859 |
| 11 | 6  | 0 | -0.754832 | 2.304208  | -0.064193 |
| 12 | 1  | 0 | -1.750785 | 2.089041  | 0.334444  |
| 13 | 6  | 0 | -0.936917 | 2.819518  | -1.505734 |
| 14 | 1  | 0 | -1.421070 | 2.073793  | -2.141224 |
| 15 | 1  | 0 | -1.553979 | 3.723308  | -1.513739 |
| 16 | 1  | 0 | 0.032342  | 3.066915  | -1.950539 |
| 17 | 6  | 0 | -0.130691 | 3.390556  | 0.820844  |
| 18 | 1  | 0 | -0.794046 | 4.259207  | 0.859221  |
| 19 | 1  | 0 | 0.022532  | 3.038260  | 1.844866  |
| 20 | 1  | 0 | 0.832228  | 3.733302  | 0.430895  |
| 21 | 6  | 0 | 2.157400  | -2.814579 | -0.158888 |
| 22 | 1  | 0 | 2.672736  | -3.012488 | 0.785643  |
| 23 | 1  | 0 | 1.455423  | -3.629143 | -0.342131 |
| 24 | 1  | 0 | 2.915290  | -2.831779 | -0.947747 |
| 25 | 8  | 0 | -4.338118 | -0.567866 | 1.412351  |
| 26 | 1  | 0 | -3.532077 | -0.131619 | 1.094307  |
| 27 | 1  | 0 | -4.164999 | -0.761365 | 2.342479  |
| 28 | 8  | 0 | -3.514799 | -2.522188 | -0.464323 |
| 29 | 1  | 0 | -4.114017 | -2.606984 | -1.216603 |
| 30 | 1  | 0 | -4.014749 | -2.019231 | 0.208280  |
| 31 | 17 | 0 | 3.837284  | -0.248109 | 0.360138  |

---

Rotational constants (GHZ):      0.6230492      0.3454761      0.2

#### 4-chlorothymolate

Electronic Energy -1076.976267

Stoichiometry C10H16ClO3(1-)

Framework group C1[X(C10H16ClO3)]

Deg. of freedom 84

Full point group C1 NOP 1

Largest Abelian subgroup C1 NOP 1

Largest concise Abelian subgroup C1 NOP 1

Standard orientation:

---

| Center<br>Number | Atomic<br>Number | Atomic<br>Type | Coordinates (Angstroms) |           |           |
|------------------|------------------|----------------|-------------------------|-----------|-----------|
|                  |                  |                | X                       | Y         | Z         |
| 1                | 6                | 0              | 0.209459                | -1.552469 | -0.027995 |
| 2                | 6                | 0              | -0.754366               | -0.523551 | -0.166382 |
| 3                | 6                | 0              | -0.284230               | 0.823807  | -0.181329 |
| 4                | 6                | 0              | 1.086603                | 1.057740  | -0.061082 |
| 5                | 6                | 0              | 1.994357                | 0.012798  | 0.070931  |
| 6                | 6                | 0              | 1.582179                | -1.322923 | 0.090938  |
| 7                | 1                | 0              | -0.145780               | -2.578207 | -0.013629 |
| 8                | 1                | 0              | 1.457119                | 2.076870  | -0.071725 |
| 9                | 8                | 0              | -2.041522               | -0.820293 | -0.277854 |
| 10               | 6                | 0              | -1.248003               | 1.992673  | -0.333932 |
| 11               | 1                | 0              | -2.251481               | 1.566521  | -0.396872 |
| 12               | 6                | 0              | -0.997063               | 2.779007  | -1.633090 |
| 13               | 1                | 0              | -1.058150               | 2.127078  | -2.509542 |
| 14               | 1                | 0              | -1.740408               | 3.574079  | -1.751665 |
| 15               | 1                | 0              | -0.006902               | 3.246085  | -1.629765 |
| 16               | 6                | 0              | -1.218513               | 2.932140  | 0.884386  |
| 17               | 1                | 0              | -1.963905               | 3.726614  | 0.775279  |
| 18               | 1                | 0              | -1.437154               | 2.389834  | 1.808770  |
| 19               | 1                | 0              | -0.239059               | 3.408166  | 0.996665  |
| 20               | 6                | 0              | 2.545495                | -2.472720 | 0.233522  |
| 21               | 1                | 0              | 2.008922                | -3.422836 | 0.223649  |
| 22               | 1                | 0              | 3.277276                | -2.486029 | -0.580066 |
| 23               | 1                | 0              | 3.109930                | -2.410027 | 1.168998  |
| 24               | 8                | 0              | -2.923820               | -3.261849 | -0.864129 |
| 25               | 1                | 0              | -2.913456               | -3.327536 | -1.825815 |
| 26               | 1                | 0              | -2.543057               | -2.360185 | -0.659864 |
| 27               | 8                | 0              | -3.718775               | -0.121284 | 1.686395  |
| 28               | 1                | 0              | -3.078650               | -0.368481 | 0.964690  |
| 29               | 1                | 0              | -3.847427               | -0.932354 | 2.191361  |
| 30               | 17               | 0              | 3.726448                | 0.414048  | 0.217554  |

Rotational constants (GHZ):      0.6121752      0.3739397      0.2644884

#### 4-methoxyphenol

Electronic Energy -575.077262

Stoichiometry C7H12O4

Framework group C1[X(C7H12O4)]

Deg. of freedom 63

Full point group C1 NOp 1

Largest Abelian subgroup C1 NOp 1

Largest concise Abelian subgroup C1 NOp 1

Standard orientation:

| Center<br>Number | Atomic<br>Number | Atomic<br>Type | Coordinates (Angstroms) |           |           |
|------------------|------------------|----------------|-------------------------|-----------|-----------|
|                  |                  |                | X                       | Y         | Z         |
| 1                | 6                | 0              | 1.700563                | -0.975283 | -0.326105 |
| 2                | 6                | 0              | 0.354255                | -1.204437 | -0.621329 |
| 3                | 6                | 0              | -0.581712               | -0.181596 | -0.496896 |
| 4                | 6                | 0              | -0.166065               | 1.085211  | -0.074538 |
| 5                | 6                | 0              | 1.172795                | 1.316264  | 0.220543  |
| 6                | 6                | 0              | 2.113304                | 0.289057  | 0.097997  |
| 7                | 1                | 0              | 2.406229                | -1.788098 | -0.431993 |
| 8                | 1                | 0              | 0.032301                | -2.185928 | -0.950404 |
| 9                | 1                | 0              | -0.888897               | 1.887468  | 0.023178  |
| 10               | 1                | 0              | 1.498578                | 2.296599  | 0.549119  |
| 11               | 8                | 0              | -1.897946               | -0.463281 | -0.800496 |
| 12               | 1                | 0              | -2.469593               | 0.323622  | -0.663771 |
| 13               | 8                | 0              | -3.915410               | 1.354927  | -0.160704 |
| 14               | 1                | 0              | -4.548051               | 1.466346  | -0.881471 |
| 15               | 1                | 0              | -4.241380               | 0.587520  | 0.349049  |
| 16               | 8                | 0              | -4.076982               | -1.141612 | 1.170384  |
| 17               | 1                | 0              | -3.323009               | -1.333969 | 0.590664  |
| 18               | 1                | 0              | -4.748814               | -1.792046 | 0.929971  |
| 19               | 8                | 0              | 3.416225                | 0.617234  | 0.416857  |
| 20               | 6                | 0              | 4.412747                | -0.404901 | 0.304866  |
| 21               | 1                | 0              | 5.350488                | 0.062412  | 0.601561  |
| 22               | 1                | 0              | 4.195307                | -1.243014 | 0.973294  |
| 23               | 1                | 0              | 4.494419                | -0.764937 | -0.724743 |

Rotational constants (GHZ):      2.4601649      0.3868185      0.3589148

#### 4-methoxyphenolate

Electronic Energy -574.607639

Stoichiometry C7H11O4(1-)

Framework group C1[X(C7H11O4)]

Deg. of freedom 60

Full point group C1 NOp 1

Largest Abelian subgroup C1 NOp 1

Largest concise Abelian subgroup C1 NOp 1

Standard orientation:

| Center<br>Number | Atomic<br>Number | Atomic<br>Type | Coordinates (Angstroms) |           |           |
|------------------|------------------|----------------|-------------------------|-----------|-----------|
|                  |                  |                | X                       | Y         | Z         |
| 1                | 6                | 0              | 1.312966                | -1.207380 | -0.019803 |
| 2                | 6                | 0              | -0.073098               | -1.199022 | 0.118225  |
| 3                | 6                | 0              | -0.826955               | -0.006480 | -0.025175 |
| 4                | 6                | 0              | -0.099046               | 1.174235  | -0.317702 |
| 5                | 6                | 0              | 1.288139                | 1.162144  | -0.450432 |
| 6                | 6                | 0              | 1.999172                | -0.027302 | -0.303509 |
| 7                | 1                | 0              | 1.866519                | -2.134650 | 0.089295  |
| 8                | 1                | 0              | -0.597663               | -2.123368 | 0.337270  |
| 9                | 1                | 0              | -0.643173               | 2.104756  | -0.442143 |
| 10               | 1                | 0              | 1.823639                | 2.078737  | -0.676750 |
| 11               | 8                | 0              | -2.145746               | 0.001758  | 0.105874  |
| 12               | 8                | 0              | -3.604029               | 2.225582  | 0.219458  |
| 13               | 1                | 0              | -3.837337               | 2.333808  | 1.148493  |
| 14               | 1                | 0              | -3.018136               | 1.416480  | 0.190338  |
| 15               | 8                | 0              | -3.626233               | -2.209072 | -0.005192 |
| 16               | 1                | 0              | -3.040296               | -1.400214 | 0.019455  |
| 17               | 1                | 0              | -4.140562               | -2.122044 | -0.815800 |

|    |   |   |          |           |           |
|----|---|---|----------|-----------|-----------|
| 18 | 8 | 0 | 3.388171 | -0.041235 | -0.488358 |
| 19 | 6 | 0 | 4.141225 | 0.063765  | 0.731508  |
| 20 | 1 | 0 | 5.195648 | 0.039400  | 0.454242  |
| 21 | 1 | 0 | 3.919115 | 1.005869  | 1.243248  |
| 22 | 1 | 0 | 3.920520 | -0.774794 | 1.399425  |

Rotational constants (GHZ): 1.7985083 0.4523952 0.3735018

#### 4-hydroxybenzonitrile

Electronic Energy -552.797296

Stoichiometry C7H9NO3

Framework group C1[X(C7H9NO3)]

Deg. of freedom 54

Full point group C1 NOp 1

Largest Abelian subgroup C1 NOp 1

Largest concise Abelian subgroup C1 NOp 1

Standard orientation:

| Center<br>Number | Atomic<br>Number | Atomic<br>Type | Coordinates (Angstroms) |           |           |
|------------------|------------------|----------------|-------------------------|-----------|-----------|
|                  |                  |                | X                       | Y         | Z         |
| 1                | 6                | 0              | -2.135175               | 1.263629  | -0.000970 |
| 2                | 6                | 0              | -0.788467               | 1.582372  | -0.011507 |
| 3                | 6                | 0              | 0.176308                | 0.563909  | -0.014877 |
| 4                | 6                | 0              | -0.224290               | -0.781104 | -0.009000 |
| 5                | 6                | 0              | -1.572613               | -1.100957 | 0.001980  |
| 6                | 6                | 0              | -2.540777               | -0.082950 | 0.006216  |
| 7                | 1                | 0              | -2.879867               | 2.050240  | 0.002251  |
| 8                | 1                | 0              | -0.465865               | 2.616524  | -0.016524 |
| 9                | 1                | 0              | 0.522349                | -1.566009 | -0.012045 |
| 10               | 1                | 0              | -1.882595               | -2.138723 | 0.007254  |
| 11               | 8                | 0              | 1.480599                | 0.933452  | -0.024851 |
| 12               | 1                | 0              | 2.092072                | 0.149000  | -0.016501 |
| 13               | 8                | 0              | 3.267177                | -1.066093 | 0.045857  |
| 14               | 1                | 0              | 3.198371                | -1.659911 | -0.712496 |
| 15               | 1                | 0              | 4.176822                | -0.695412 | 0.005750  |
| 16               | 8                | 0              | 5.834283                | -0.012394 | -0.007754 |
| 17               | 1                | 0              | 6.162463                | 0.105820  | 0.893286  |
| 18               | 1                | 0              | 5.844376                | 0.874670  | -0.390540 |
| 19               | 6                | 0              | -3.924047               | -0.412835 | 0.018024  |
| 20               | 7                | 0              | -5.052889               | -0.681185 | 0.027765  |

Rotational constants (GHZ): 3.6246217 0.3198568

#### 4-cyanophenolate

Electronic Energy -552.335086

Stoichiometry C7H8NO3(1-)

Framework group C1[X(C7H8NO3)]

Deg. of freedom 51

Full point group C1 NOp 1

Largest Abelian subgroup C1 NOp 1

Largest concise Abelian subgroup C1 NOp 1

Standard orientation:

| Center<br>Number | Atomic<br>Number | Atomic<br>Type | Coordinates (Angstroms) |           |           |
|------------------|------------------|----------------|-------------------------|-----------|-----------|
|                  |                  |                | X                       | Y         | Z         |
| 1                | 6                | 0              | -1.453836               | 1.208022  | 0.127941  |
| 2                | 6                | 0              | -0.073291               | 1.208249  | 0.127448  |
| 3                | 6                | 0              | 0.673999                | -0.000188 | -0.000906 |
| 4                | 6                | 0              | -0.073559               | -1.208511 | -0.128896 |
| 5                | 6                | 0              | -1.454091               | -1.208087 | -0.128462 |
| 6                | 6                | 0              | -2.171316               | 0.000022  | -0.000009 |
| 7                | 1                | 0              | -1.996411               | 2.141520  | 0.227895  |
| 8                | 1                | 0              | 0.468088                | 2.142446  | 0.227695  |
| 9                | 1                | 0              | 0.467643                | -2.142772 | -0.229553 |
| 10               | 1                | 0              | -1.996892               | -2.141489 | -0.228104 |
| 11               | 8                | 0              | 1.977375                | -0.000326 | -0.001170 |
| 12               | 8                | 0              | 3.499806                | -2.226017 | 0.031851  |
| 13               | 1                | 0              | 3.764372                | -2.347256 | 0.950971  |
| 14               | 1                | 0              | 2.901044                | -1.434111 | 0.038929  |
| 15               | 8                | 0              | 3.499567                | 2.226184  | -0.029918 |

|    |   |   |           |          |           |
|----|---|---|-----------|----------|-----------|
| 16 | 1 | 0 | 2.900731  | 1.434392 | -0.038380 |
| 17 | 1 | 0 | 3.762868  | 2.349818 | -0.949095 |
| 18 | 6 | 0 | -3.586878 | 0.000151 | 0.000565  |
| 19 | 7 | 0 | -4.750229 | 0.000110 | 0.001064  |

Rotational constants (GHZ): 1.9055870 0.4620672 0.3734441

#### 4-nitrophenol

Electronic Energy -665.095584

Stoichiometry C<sub>6</sub>H<sub>9</sub>NO<sub>5</sub>

Framework group C1[X(C<sub>6</sub>H<sub>9</sub>NO<sub>5</sub>)]

Deg. of freedom 57

Full point group C1 NOp 1

Largest Abelian subgroup C1 NOp 1

Largest concise Abelian subgroup C1 NOp 1

Standard orientation:

| Center<br>Number | Atomic<br>Number | Atomic<br>Type | Coordinates (Angstroms) |           |           |
|------------------|------------------|----------------|-------------------------|-----------|-----------|
|                  |                  |                | X                       | Y         | Z         |
| 1                | 6                | 0              | -1.663101               | 1.324062  | 0.098003  |
| 2                | 6                | 0              | -0.342194               | 1.690227  | -0.063005 |
| 3                | 6                | 0              | 0.641928                | 0.709749  | -0.284841 |
| 4                | 6                | 0              | 0.279643                | -0.648725 | -0.343547 |
| 5                | 6                | 0              | -1.042197               | -1.018127 | -0.181948 |
| 6                | 6                | 0              | -2.009656               | -0.031591 | 0.038155  |
| 7                | 1                | 0              | -2.423415               | 2.073367  | 0.268512  |
| 8                | 1                | 0              | -0.048628               | 2.731729  | -0.020472 |
| 9                | 1                | 0              | 1.039660                | -1.400627 | -0.514199 |
| 10               | 1                | 0              | -1.327763               | -2.059915 | -0.225406 |
| 11               | 8                | 0              | 1.912185                | 1.127376  | -0.434384 |
| 12               | 1                | 0              | 2.555553                | 0.377892  | -0.580219 |
| 13               | 8                | 0              | 3.767455                | -0.747001 | -0.810983 |
| 14               | 1                | 0              | 4.182588                | -0.635845 | -1.675764 |
| 15               | 1                | 0              | 4.490674                | -0.625141 | -0.156087 |
| 16               | 8                | 0              | 5.754779                | -0.449589 | 1.105350  |
| 17               | 1                | 0              | 5.435792                | 0.096542  | 1.835984  |
| 18               | 1                | 0              | 6.526750                | 0.022299  | 0.766248  |
| 19               | 7                | 0              | -3.387861               | -0.417854 | 0.205636  |
| 20               | 8                | 0              | -3.684408               | -1.618432 | 0.154829  |
| 21               | 8                | 0              | -4.237850               | 0.461532  | 0.395817  |

Rotational constants (GHZ): 2.2440105 0.2882818 0.2682157

#### 4-nitrophenolate

Electronic Energy -664.638571

Stoichiometry C<sub>6</sub>H<sub>8</sub>NO<sub>5</sub>(1-)

Framework group C1[X(C<sub>6</sub>H<sub>8</sub>NO<sub>5</sub>)]

Deg. of freedom 54

Full point group C1 NOp 1

Largest Abelian subgroup C1 NOp 1

Largest concise Abelian subgroup C1 NOp 1

Standard orientation:

| Center<br>Number | Atomic<br>Number | Atomic<br>Type | Coordinates (Angstroms) |           |           |
|------------------|------------------|----------------|-------------------------|-----------|-----------|
|                  |                  |                | X                       | Y         | Z         |
| 1                | 6                | 0              | 1.050540                | 1.221205  | -0.066392 |
| 2                | 6                | 0              | -0.321353               | 1.221551  | -0.066386 |
| 3                | 6                | 0              | -1.072375               | 0.000008  | -0.000098 |
| 4                | 6                | 0              | -0.321364               | -1.221539 | 0.066237  |
| 5                | 6                | 0              | 1.050529                | -1.221199 | 0.066336  |
| 6                | 6                | 0              | 1.754877                | 0.000001  | -0.000003 |
| 7                | 1                | 0              | 1.598519                | 2.152480  | -0.117712 |
| 8                | 1                | 0              | -0.866880               | 2.156615  | -0.117826 |
| 9                | 1                | 0              | -0.866899               | -2.156600 | 0.117639  |
| 10               | 1                | 0              | 1.598499                | -2.152478 | 0.117691  |
| 11               | 8                | 0              | -2.358641               | 0.000011  | -0.000141 |
| 12               | 8                | 0              | -3.913440               | -2.245515 | -0.009920 |
| 13               | 1                | 0              | -4.449508               | -2.171078 | -0.807875 |
| 14               | 1                | 0              | -3.319517               | -1.456586 | -0.027192 |
| 15               | 8                | 0              | -3.913477               | 2.245507  | 0.010126  |



|    |   |   |           |           |           |
|----|---|---|-----------|-----------|-----------|
| 16 | 1 | 0 | -3.319515 | 1.456604  | 0.027222  |
| 17 | 1 | 0 | -4.449423 | 2.170953  | 0.808151  |
| 18 | 7 | 0 | 3.165496  | -0.000003 | 0.000047  |
| 19 | 8 | 0 | 3.784720  | -1.085824 | 0.056967  |
| 20 | 8 | 0 | 3.784729  | 1.085814  | -0.056856 |

Rotational constants (GHZ):            1.6580401            0.3809862            0.3104356

**4-nitrothymol**

Electronic Energy -822.391872

Stoichiometry C10H17NO5

Framework group C1[X(C10H17NO5)]

Deg. of freedom 93

Full point group C1 NOp 1

Largest Abelian subgroup C1 NOp 1

Largest concise Abelian subgroup C1 NOp 1

Standard orientation:

| Center<br>Number | Atomic<br>Number | Atomic<br>Type | Coordinates (Angstroms) |           |           |
|------------------|------------------|----------------|-------------------------|-----------|-----------|
|                  |                  |                | X                       | Y         | Z         |
| 1                | 6                | 0              | -1.522861               | 0.767993  | -0.007563 |
| 2                | 6                | 0              | -0.218548               | 1.174921  | -0.212015 |
| 3                | 6                | 0              | 0.748414                | 0.153654  | -0.382125 |
| 4                | 6                | 0              | 0.381975                | -1.197778 | -0.342943 |
| 5                | 6                | 0              | -0.925726               | -1.617280 | -0.119388 |
| 6                | 6                | 0              | -1.881548               | -0.589233 | 0.049543  |
| 7                | 1                | 0              | -2.301820               | 1.503646  | 0.128831  |
| 8                | 1                | 0              | 1.151052                | -1.945291 | -0.496678 |
| 9                | 8                | 0              | 2.027557                | 0.524705  | -0.588677 |
| 10               | 1                | 0              | 2.642373                | -0.252129 | -0.693137 |
| 11               | 8                | 0              | 3.851884                | -1.412632 | -0.883421 |
| 12               | 1                | 0              | 4.286402                | -1.305392 | -1.739086 |
| 13               | 1                | 0              | 4.560815                | -1.288119 | -0.213783 |
| 14               | 8                | 0              | 5.774570                | -1.095702 | 1.092873  |
| 15               | 1                | 0              | 5.778932                | -0.190416 | 1.430237  |
| 16               | 1                | 0              | 6.673785                | -1.240708 | 0.770484  |
| 17               | 7                | 0              | -3.275669               | -0.875252 | 0.278647  |
| 18               | 8                | 0              | -3.618185               | -2.015583 | 0.616685  |
| 19               | 8                | 0              | -4.107608               | 0.035870  | 0.138608  |
| 20               | 6                | 0              | 0.197571                | 2.637710  | -0.221190 |
| 21               | 1                | 0              | 1.010663                | 2.729943  | -0.947274 |
| 22               | 6                | 0              | 0.757921                | 3.048086  | 1.155295  |
| 23               | 1                | 0              | 1.582331                | 2.401142  | 1.464694  |
| 24               | 1                | 0              | 1.128481                | 4.076999  | 1.122954  |
| 25               | 1                | 0              | -0.023834               | 2.992520  | 1.919456  |
| 26               | 6                | 0              | -0.921156               | 3.592326  | -0.654809 |
| 27               | 1                | 0              | -1.340271               | 3.308871  | -1.624376 |
| 28               | 1                | 0              | -1.736944               | 3.623818  | 0.073393  |
| 29               | 1                | 0              | -0.523366               | 4.606979  | -0.743097 |
| 30               | 6                | 0              | -1.207728               | -3.096135 | -0.112434 |
| 31               | 1                | 0              | -1.494399               | -3.441661 | 0.883439  |
| 32               | 1                | 0              | -2.027168               | -3.355243 | -0.786133 |
| 33               | 1                | 0              | -0.312974               | -3.637044 | -0.423207 |

Rotational constants (GHZ):            0.5649846            0.2765779            0.1987812

**4-nitrothymolate**

Electronic Energy -822.391872

Stoichiometry C10H16NO5(1-)

Framework group C1[X(C10H16NO5)]

Deg. of freedom 90

Full point group C1 NOp 1

Largest Abelian subgroup C1 NOp 1

Largest concise Abelian subgroup C1 NOP 1

Standard orientation:

| Center<br>Number | Atomic<br>Number | Atomic<br>Type | Coordinates (Angstroms) |           |           |
|------------------|------------------|----------------|-------------------------|-----------|-----------|
|                  |                  |                | X                       | Y         | Z         |
| 1                | 6                | 0              | 0.977393                | -1.031607 | -0.066050 |
| 2                | 6                | 0              | -0.376600               | -0.814091 | -0.090788 |

|    |   |   |           |           |           |
|----|---|---|-----------|-----------|-----------|
| 3  | 6 | 0 | -0.847452 | 0.553952  | -0.069907 |
| 4  | 6 | 0 | 0.133720  | 1.592593  | -0.025739 |
| 5  | 6 | 0 | 1.497174  | 1.380869  | 0.001272  |
| 6  | 6 | 0 | 1.928279  | 0.019030  | -0.018942 |
| 7  | 1 | 0 | 1.357909  | -2.042265 | -0.084526 |
| 8  | 1 | 0 | -0.236446 | 2.612216  | -0.014023 |
| 9  | 8 | 0 | -2.099892 | 0.844742  | -0.094993 |
| 10 | 8 | 0 | -3.121853 | 3.362708  | 0.058771  |
| 11 | 1 | 0 | -2.403697 | 4.001485  | -0.018661 |
| 12 | 1 | 0 | -2.680505 | 2.479645  | 0.000105  |
| 13 | 8 | 0 | -4.648261 | -0.174613 | -0.315159 |
| 14 | 1 | 0 | -3.704830 | 0.089714  | -0.239527 |
| 15 | 1 | 0 | -5.125360 | 0.659333  | -0.399603 |
| 16 | 7 | 0 | 3.288434  | -0.351513 | 0.001786  |
| 17 | 8 | 0 | 4.185595  | 0.520969  | 0.035685  |
| 18 | 8 | 0 | 3.602808  | -1.568854 | -0.011061 |
| 19 | 6 | 0 | -1.388749 | -1.947069 | -0.108011 |
| 20 | 1 | 0 | -2.226982 | -1.607719 | -0.724182 |
| 21 | 6 | 0 | -1.936911 | -2.207063 | 1.309928  |
| 22 | 1 | 0 | -2.338122 | -1.296661 | 1.761213  |
| 23 | 1 | 0 | -2.738223 | -2.951833 | 1.281261  |
| 24 | 1 | 0 | -1.143681 | -2.587782 | 1.961636  |
| 25 | 6 | 0 | -0.860227 | -3.248445 | -0.723267 |
| 26 | 1 | 0 | -0.462922 | -3.087220 | -1.729522 |
| 27 | 1 | 0 | -0.069866 | -3.697781 | -0.114343 |
| 28 | 1 | 0 | -1.671076 | -3.978954 | -0.794613 |
| 29 | 6 | 0 | 2.402371  | 2.584724  | 0.047729  |
| 30 | 1 | 0 | 3.035836  | 2.579568  | 0.937430  |
| 31 | 1 | 0 | 3.071773  | 2.620010  | -0.814529 |
| 32 | 1 | 0 | 1.795999  | 3.491858  | 0.056091  |

-----  
Rotational constants (GHZ):      0.6409108      0.3169995      0.2201699

## - 2H<sub>2</sub>O/B3LYP 6-311G+dp/PCM

### H<sub>2</sub>O

Electronic Energy -229.411585

Stoichiometry H6O3

Framework group C1[X(H6O3)]

Deg. of freedom 21

Full point group C1 NOp 1

Largest Abelian subgroup C1 NOp 1

Largest concise Abelian subgroup C1 NOp 1

Standard orientation:

| Center<br>Number | Atomic<br>Number | Atomic<br>Type | Coordinates (Angstroms) |           |           |
|------------------|------------------|----------------|-------------------------|-----------|-----------|
|                  |                  |                | X                       | Y         | Z         |
| 1                | 8                | 0              | 2.252207                | -0.617414 | -0.000217 |
| 2                | 1                | 0              | 1.885750                | -1.507876 | -0.001218 |
| 3                | 1                | 0              | 1.478583                | -0.027246 | -0.000007 |
| 4                | 8                | 0              | -0.002259               | 1.183651  | 0.000256  |
| 5                | 1                | 0              | -0.006374               | 1.769886  | -0.767289 |
| 6                | 1                | 0              | -0.006471               | 1.770013  | 0.767703  |
| 7                | 8                | 0              | -2.118421               | -0.770095 | 0.001452  |
| 8                | 1                | 0              | -1.442815               | -0.069801 | 0.000397  |
| 9                | 1                | 0              | -2.960887               | -0.304115 | -0.011519 |

-----  
Rotational constants (GHZ):      10.5713991      2.9583424      2.3368711

### OH<sup>-</sup>

Electronic Energy -228.930353

Stoichiometry H5O3(1-)

Framework group C1[X(H5O3)]

Deg. of freedom 18

Full point group C1 NOp 1

Largest Abelian subgroup C1 NOp 1

Largest concise Abelian subgroup C1 NOp 1

Standard orientation:

| Center<br>Number            | Atomic<br>Number | Atomic<br>Type | Coordinates (Angstroms) |           |           |
|-----------------------------|------------------|----------------|-------------------------|-----------|-----------|
|                             |                  |                | X                       | Y         | Z         |
| 1                           | 8                | 0              | -2.206177               | -0.500235 | 0.079535  |
| 2                           | 1                | 0              | -1.337317               | 0.044429  | 0.037315  |
| 3                           | 1                | 0              | -2.740320               | -0.191497 | -0.658468 |
| 4                           | 8                | 0              | -0.002751               | 0.823110  | -0.042352 |
| 5                           | 1                | 0              | -0.001224               | 1.616774  | 0.502239  |
| 6                           | 8                | 0              | 2.263495                | -0.395997 | -0.099074 |
| 7                           | 1                | 0              | 1.365492                | 0.097713  | -0.049248 |
| 8                           | 1                | 0              | 2.276828                | -0.982437 | 0.663289  |
| Rotational constants (GHZ): |                  |                | 22.6190704              | 2.8439268 | 2.5611181 |

### Phenol

Electronic Energy -460.513121

Stoichiometry C<sub>6</sub>H<sub>10</sub>O<sub>3</sub>

Framework group C1[X(C<sub>6</sub>H<sub>10</sub>O<sub>3</sub>)]

Deg. of freedom 51

Full point group C1 NOp 1

Largest Abelian subgroup C1 NOp 1

Largest concise Abelian subgroup C1 NOp 1

Standard orientation:

| Center<br>Number            | Atomic<br>Number | Atomic<br>Type | Coordinates (Angstroms) |           |           |
|-----------------------------|------------------|----------------|-------------------------|-----------|-----------|
|                             |                  |                | X                       | Y         | Z         |
| 1                           | 6                | 0              | 0.841640                | 1.155245  | 0.089364  |
| 2                           | 6                | 0              | 0.151589                | -0.042189 | -0.124440 |
| 3                           | 6                | 0              | 0.852919                | -1.247448 | -0.219956 |
| 4                           | 6                | 0              | 2.240842                | -1.250346 | -0.100747 |
| 5                           | 6                | 0              | 2.939472                | -0.060417 | 0.113063  |
| 6                           | 6                | 0              | 2.231434                | 1.137811  | 0.206095  |
| 7                           | 1                | 0              | 0.292544                | 2.087162  | 0.161383  |
| 8                           | 1                | 0              | 2.777776                | -2.189414 | -0.176244 |
| 9                           | 1                | 0              | 4.019077                | -0.067623 | 0.204967  |
| 10                          | 8                | 0              | -1.211126               | -0.082095 | -0.248574 |
| 11                          | 1                | 0              | -1.610516               | 0.813840  | -0.170591 |
| 12                          | 8                | 0              | -2.973442               | -2.245386 | 0.369748  |
| 13                          | 1                | 0              | -3.088698               | -2.711632 | -0.464985 |
| 14                          | 1                | 0              | -2.367509               | -1.511372 | 0.163660  |
| 15                          | 8                | 0              | -2.407424               | 2.371527  | -0.052743 |
| 16                          | 1                | 0              | -2.910987               | 2.548041  | 0.751030  |
| 17                          | 1                | 0              | -2.989395               | 2.620753  | -0.780904 |
| 18                          | 1                | 0              | 2.759998                | 2.070157  | 0.371555  |
| 19                          | 1                | 0              | 0.306280                | -2.168210 | -0.387586 |
| Rotational constants (GHZ): |                  |                | 1.7519272               | 0.8822399 | 0.5959856 |

### Phenolate

Electronic Energy -460.046389

Stoichiometry C<sub>6</sub>H<sub>9</sub>O<sub>3</sub>(1-)

Framework group C1[X(C<sub>6</sub>H<sub>9</sub>O<sub>3</sub>)]

Deg. of freedom 48

Full point group C1 NOp 1

Largest Abelian subgroup C1 NOp 1

Largest concise Abelian subgroup C1 NOp 1

Standard orientation:

| Center<br>Number | Atomic<br>Number | Atomic<br>Type | Coordinates (Angstroms) |           |           |
|------------------|------------------|----------------|-------------------------|-----------|-----------|
|                  |                  |                | X                       | Y         | Z         |
| 1                | 6                | 0              | 0.814211                | 1.206499  | -0.061315 |
| 2                | 6                | 0              | 0.062810                | 0.000031  | -0.000449 |
| 3                | 6                | 0              | 0.814091                | -1.206493 | 0.060834  |
| 4                | 6                | 0              | 2.206263                | -1.199452 | 0.060512  |
| 5                | 6                | 0              | 2.923320                | -0.000075 | 0.000380  |
| 6                | 6                | 0              | 2.206384                | 1.199352  | -0.060182 |
| 7                | 1                | 0              | 0.274887                | 2.147526  | -0.109400 |

|    |   |   |           |           |           |
|----|---|---|-----------|-----------|-----------|
| 8  | 1 | 0 | 2.740158  | -2.144344 | 0.108754  |
| 9  | 1 | 0 | 4.007316  | -0.000111 | 0.000698  |
| 10 | 8 | 0 | -1.249989 | 0.000068  | -0.000837 |
| 11 | 8 | 0 | -2.784421 | 2.159751  | 0.169682  |
| 12 | 1 | 0 | -2.659733 | 2.671430  | -0.635627 |
| 13 | 1 | 0 | -2.164336 | 1.379920  | 0.085047  |
| 14 | 8 | 0 | -2.784463 | -2.159853 | -0.168944 |
| 15 | 1 | 0 | -2.164424 | -1.379909 | -0.085195 |
| 16 | 1 | 0 | -2.660392 | -2.670129 | 0.637351  |
| 17 | 1 | 0 | 0.274659  | -2.147475 | 0.108603  |
| 18 | 1 | 0 | 2.740376  | 2.144204  | -0.108118 |

Rotational constants (GHZ): 1.9631148 0.8937955 0.6170292

### Thymol

Electronic Energy -617.812865

Stoichiometry C10H18O3

Framework group C1[X(C10H18O3)]

Deg. of freedom 87

Full point group C1 NOp 1

Largest Abelian subgroup C1 NOp 1

Largest concise Abelian subgroup C1 NOp 1

Standard orientation:

| Center<br>Number | Atomic<br>Number | Atomic<br>Type | Coordinates (Angstroms) |           |           |
|------------------|------------------|----------------|-------------------------|-----------|-----------|
|                  |                  |                | X                       | Y         | Z         |
| 1                | 6                | 0              | 1.656500                | 0.274600  | -0.007448 |
| 2                | 6                | 0              | 0.265766                | 0.291450  | 0.103174  |
| 3                | 6                | 0              | -0.491084               | -0.893491 | 0.024609  |
| 4                | 6                | 0              | 0.220396                | -2.079623 | -0.168940 |
| 5                | 6                | 0              | 1.612572                | -2.105609 | -0.276762 |
| 6                | 6                | 0              | 2.352302                | -0.924572 | -0.195785 |
| 7                | 1                | 0              | 2.198167                | 1.213213  | 0.056202  |
| 8                | 1                | 0              | -0.321421               | -3.015800 | -0.236641 |
| 9                | 1                | 0              | 2.121015                | -3.052374 | -0.425416 |
| 10               | 8                | 0              | -0.407410               | 1.477509  | 0.287738  |
| 11               | 1                | 0              | 0.219761                | 2.214175  | 0.460382  |
| 12               | 6                | 0              | -2.003972               | -0.858751 | 0.200633  |
| 13               | 1                | 0              | -2.355709               | 0.090547  | -0.212495 |
| 14               | 6                | 0              | -2.377067               | -0.869309 | 1.697667  |
| 15               | 1                | 0              | -1.897128               | -0.045989 | 2.231847  |
| 16               | 1                | 0              | -3.459692               | -0.772894 | 1.825923  |
| 17               | 1                | 0              | -2.062890               | -1.807721 | 2.165678  |
| 18               | 6                | 0              | -2.740784               | -1.978669 | -0.548435 |
| 19               | 1                | 0              | -3.821016               | -1.826307 | -0.472752 |
| 20               | 1                | 0              | -2.475556               | -1.995310 | -1.609069 |
| 21               | 1                | 0              | -2.522489               | -2.964948 | -0.128706 |
| 22               | 6                | 0              | 3.857685                | -0.923713 | -0.317932 |
| 23               | 1                | 0              | 4.182562                | -0.371823 | -1.205695 |
| 24               | 1                | 0              | 4.326236                | -0.445261 | 0.547286  |
| 25               | 1                | 0              | 4.247779                | -1.940437 | -0.394335 |
| 26               | 8                | 0              | -2.114616               | 2.617173  | -1.727486 |
| 27               | 1                | 0              | -1.580511               | 2.197391  | -1.029787 |
| 28               | 1                | 0              | -2.973816               | 2.774129  | -1.321872 |
| 29               | 8                | 0              | 1.236370                | 3.628738  | 0.786017  |
| 30               | 1                | 0              | 1.242912                | 3.966027  | 1.689963  |
| 31               | 1                | 0              | 1.103170                | 4.402146  | 0.224656  |

Rotational constants (GHZ): 0.6494772 0.5774567 0.3599864

### Thymolate

Electronic Energy -617.342935

Stoichiometry C10H17O3(1-)

Framework group C1[X(C10H17O3)]

Deg. of freedom 84

Full point group C1 NOp 1

Largest Abelian subgroup C1 NOp 1

Largest concise Abelian subgroup C1 NOp 1

Standard orientation:

| Center<br>Number            | Atomic<br>Number | Atomic<br>Type | Coordinates (Angstroms) |           |           |
|-----------------------------|------------------|----------------|-------------------------|-----------|-----------|
|                             |                  |                | X                       | Y         | Z         |
| 1                           | 6                | 0              | -1.564293               | 0.826235  | -0.020035 |
| 2                           | 6                | 0              | -0.196255               | 0.443050  | -0.062908 |
| 3                           | 6                | 0              | 0.091875                | -0.961435 | -0.078845 |
| 4                           | 6                | 0              | -0.972505               | -1.862564 | -0.033524 |
| 5                           | 6                | 0              | -2.309664               | -1.456435 | 0.018348  |
| 6                           | 6                | 0              | -2.614727               | -0.090400 | 0.026347  |
| 7                           | 1                | 0              | -1.784886               | 1.890567  | -0.019968 |
| 8                           | 1                | 0              | -0.760233               | -2.927731 | -0.044801 |
| 9                           | 1                | 0              | -3.103397               | -2.196446 | 0.046155  |
| 10                          | 8                | 0              | 0.748838                | 1.356811  | -0.092854 |
| 11                          | 6                | 0              | 1.538415                | -1.434825 | -0.107169 |
| 12                          | 1                | 0              | 2.124324                | -0.621430 | -0.542000 |
| 13                          | 6                | 0              | 1.771100                | -2.679866 | -0.979071 |
| 14                          | 1                | 0              | 1.400597                | -2.528447 | -1.997122 |
| 15                          | 1                | 0              | 2.840666                | -2.904754 | -1.039318 |
| 16                          | 1                | 0              | 1.276575                | -3.566495 | -0.570603 |
| 17                          | 6                | 0              | 2.076582                | -1.669787 | 1.319332  |
| 18                          | 1                | 0              | 3.140905                | -1.928572 | 1.301539  |
| 19                          | 1                | 0              | 1.956057                | -0.777336 | 1.938918  |
| 20                          | 1                | 0              | 1.538185                | -2.491297 | 1.804174  |
| 21                          | 6                | 0              | -4.048450               | 0.385393  | 0.113532  |
| 22                          | 1                | 0              | -4.350757               | 0.545094  | 1.155031  |
| 23                          | 1                | 0              | -4.188810               | 1.333600  | -0.412112 |
| 24                          | 1                | 0              | -4.737922               | -0.346767 | -0.314791 |
| 25                          | 8                | 0              | 0.331809                | 3.977584  | -0.009183 |
| 26                          | 1                | 0              | -0.180855               | 4.224666  | -0.785117 |
| 27                          | 1                | 0              | 0.423660                | 2.981828  | -0.059184 |
| 28                          | 8                | 0              | 3.405239                | 1.688898  | -0.086186 |
| 29                          | 1                | 0              | 2.433472                | 1.481708  | -0.083433 |
| 30                          | 1                | 0              | 3.452871                | 2.649275  | -0.047628 |
| Rotational constants (GHZ): |                  |                | 0.7163425               | 0.5788882 | 0.3417463 |

## - 2H<sub>2</sub>O/ B3LYP 6-311G+dp/CPCM

### H<sub>2</sub>O

Electronic Energy -229.411687

Stoichiometry H6O3

Framework group C1[X(H6O3)]

Deg. of freedom 21

Full point group C1 NOp 1

Largest Abelian subgroup C1 NOp 1

Largest concise Abelian subgroup C1 NOp 1

Standard orientation:

| Center<br>Number            | Atomic<br>Number | Atomic<br>Type | Coordinates (Angstroms) |           |           |
|-----------------------------|------------------|----------------|-------------------------|-----------|-----------|
|                             |                  |                | X                       | Y         | Z         |
| 1                           | 8                | 0              | 2.252693                | -0.617041 | -0.000269 |
| 2                           | 1                | 0              | 1.886759                | -1.507732 | -0.001290 |
| 3                           | 1                | 0              | 1.478717                | -0.027309 | -0.000070 |
| 4                           | 8                | 0              | -0.002426               | 1.183267  | 0.000232  |
| 5                           | 1                | 0              | -0.006791               | 1.769541  | -0.767287 |
| 6                           | 1                | 0              | -0.006839               | 1.769704  | 0.767626  |
| 7                           | 8                | 0              | -2.118803               | -0.770052 | 0.001581  |
| 8                           | 1                | 0              | -1.442680               | -0.070235 | 0.000435  |
| 9                           | 1                | 0              | -2.960879               | -0.303355 | -0.011772 |
| Rotational constants (GHZ): |                  |                | 10.5772216              | 2.9572214 | 2.3364534 |

### OH

Electronic Energy -228.930472

Stoichiometry H5O3(1-)

Framework group C1[X(H5O3)]

Deg. of freedom 18

Full point group C1 NOp 1  
 Largest Abelian subgroup C1 NOp 1  
 Largest concise Abelian subgroup C1 NOp 1  
 Standard orientation:

| Center<br>Number | Atomic<br>Number | Atomic<br>Type | Coordinates (Angstroms) |           |           |
|------------------|------------------|----------------|-------------------------|-----------|-----------|
|                  |                  |                | X                       | Y         | Z         |
| 1                | 8                | 0              | -2.199979               | -0.503518 | 0.079539  |
| 2                | 1                | 0              | -1.339922               | 0.054683  | 0.034583  |
| 3                | 1                | 0              | -2.743830               | -0.199186 | -0.653209 |
| 4                | 8                | 0              | -0.002584               | 0.828923  | -0.042875 |
| 5                | 1                | 0              | 0.000754                | 1.622460  | 0.501907  |
| 6                | 8                | 0              | 2.258546                | -0.399490 | -0.099219 |
| 7                | 1                | 0              | 1.363133                | 0.098680  | -0.047518 |
| 8                | 1                | 0              | 2.272001                | -0.983956 | 0.664681  |

Rotational constants (GHZ): 22.3472549 2.8568217 2.5678934

### Phenol

Electronic Energy -460.513184  
 Stoichiometry C6H10O3  
 Framework group C1[X(C6H10O3)]  
 Deg. of freedom 51  
 Full point group C1 NOp 1  
 Largest Abelian subgroup C1 NOp 1  
 Largest concise Abelian subgroup C1 NOp 1  
 Standard orientation:

| Center<br>Number | Atomic<br>Number | Atomic<br>Type | Coordinates (Angstroms) |           |           |
|------------------|------------------|----------------|-------------------------|-----------|-----------|
|                  |                  |                | X                       | Y         | Z         |
| 1                | 6                | 0              | 0.841640                | 1.155245  | 0.089364  |
| 2                | 6                | 0              | 0.151589                | -0.042189 | -0.124440 |
| 3                | 6                | 0              | 0.852919                | -1.247448 | -0.219956 |
| 4                | 6                | 0              | 2.240842                | -1.250346 | -0.100747 |
| 5                | 6                | 0              | 2.939472                | -0.060417 | 0.113063  |
| 6                | 6                | 0              | 2.231434                | 1.137811  | 0.206095  |
| 7                | 1                | 0              | 0.292544                | 2.087162  | 0.161383  |
| 8                | 1                | 0              | 2.777776                | -2.189414 | -0.176244 |
| 9                | 1                | 0              | 4.019077                | -0.067623 | 0.204967  |
| 10               | 8                | 0              | -1.211126               | -0.082095 | -0.248574 |
| 11               | 1                | 0              | -1.610516               | 0.813840  | -0.170591 |
| 12               | 8                | 0              | -2.973442               | -2.245386 | 0.369748  |
| 13               | 1                | 0              | -3.088698               | -2.711632 | -0.464985 |
| 14               | 1                | 0              | -2.367509               | -1.511372 | 0.163660  |
| 15               | 8                | 0              | -2.407424               | 2.371527  | -0.052743 |
| 16               | 1                | 0              | -2.910987               | 2.548041  | 0.751030  |
| 17               | 1                | 0              | -2.989395               | 2.620753  | -0.780904 |
| 18               | 1                | 0              | 2.759998                | 2.070157  | 0.371555  |
| 19               | 1                | 0              | 0.306280                | -2.168210 | -0.387586 |

Rotational constants (GHZ): 1.7519272 0.8822399 0.5959856

### Phenolate

Electronic Energy -460.046575  
 Stoichiometry C6H9O3(1-)  
 Framework group C1[X(C6H9O3)]  
 Deg. of freedom 48  
 Full point group C1 NOp 1  
 Largest Abelian subgroup C1 NOp 1  
 Largest concise Abelian subgroup C1 NOp 1  
 Standard orientation:

| Center<br>Number | Atomic<br>Number | Atomic<br>Type | Coordinates (Angstroms) |           |           |
|------------------|------------------|----------------|-------------------------|-----------|-----------|
|                  |                  |                | X                       | Y         | Z         |
| 1                | 6                | 0              | 0.814211                | 1.206499  | -0.061315 |
| 2                | 6                | 0              | 0.062810                | 0.000031  | -0.000449 |
| 3                | 6                | 0              | 0.814091                | -1.206493 | 0.060834  |
| 4                | 6                | 0              | 2.206263                | -1.199452 | 0.060512  |

|    |   |   |           |           |           |
|----|---|---|-----------|-----------|-----------|
| 5  | 6 | 0 | 2.923320  | -0.000075 | 0.000380  |
| 6  | 6 | 0 | 2.206384  | 1.199352  | -0.060182 |
| 7  | 1 | 0 | 0.274887  | 2.147526  | -0.109400 |
| 8  | 1 | 0 | 2.740158  | -2.144344 | 0.108754  |
| 9  | 1 | 0 | 4.007316  | -0.000111 | 0.000698  |
| 10 | 8 | 0 | -1.249989 | 0.000068  | -0.000837 |
| 11 | 8 | 0 | -2.784421 | 2.159751  | 0.169682  |
| 12 | 1 | 0 | -2.659733 | 2.671430  | -0.635627 |
| 13 | 1 | 0 | -2.164336 | 1.379920  | 0.085047  |
| 14 | 8 | 0 | -2.784463 | -2.159853 | -0.168944 |
| 15 | 1 | 0 | -2.164424 | -1.379909 | -0.085195 |
| 16 | 1 | 0 | -2.660392 | -2.670129 | 0.637351  |
| 17 | 1 | 0 | 0.274659  | -2.147475 | 0.108603  |
| 18 | 1 | 0 | 2.740376  | 2.144204  | -0.108118 |

Rotational constants (GHZ): 1.9631148 0.8937955 0.6170292

### Thymol

Electronic Energy -617.812974

Stoichiometry C10H18O3

Framework group C1[X(C10H18O3)]

Deg. of freedom 87

Full point group C1 NOp 1

Largest Abelian subgroup C1 NOp 1

Largest concise Abelian subgroup C1 NOp 1

Standard orientation:

| Center<br>Number | Atomic<br>Number | Atomic<br>Type | Coordinates (Angstroms) |           |           |
|------------------|------------------|----------------|-------------------------|-----------|-----------|
|                  |                  |                | X                       | Y         | Z         |
| 1                | 6                | 0              | 1.657090                | 0.272018  | -0.006869 |
| 2                | 6                | 0              | 0.266394                | 0.291497  | 0.104070  |
| 3                | 6                | 0              | -0.492725               | -0.891993 | 0.025011  |
| 4                | 6                | 0              | 0.216454                | -2.079392 | -0.169322 |
| 5                | 6                | 0              | 1.608563                | -2.107991 | -0.277490 |
| 6                | 6                | 0              | 2.350565                | -0.928390 | -0.196021 |
| 7                | 1                | 0              | 2.200599                | 1.209535  | 0.057171  |
| 8                | 1                | 0              | -0.327171               | -3.014510 | -0.237299 |
| 9                | 1                | 0              | 2.115157                | -3.055652 | -0.426732 |
| 10               | 8                | 0              | -0.404474               | 1.478696  | 0.289425  |
| 11               | 1                | 0              | 0.224034                | 2.214254  | 0.462074  |
| 12               | 6                | 0              | -2.005486               | -0.854686 | 0.201626  |
| 13               | 1                | 0              | -2.355519               | 0.096476  | -0.208577 |
| 14               | 6                | 0              | -2.378004               | -0.868844 | 1.698772  |
| 15               | 1                | 0              | -1.896198               | -0.048034 | 2.235162  |
| 16               | 1                | 0              | -3.460370               | -0.770577 | 1.827732  |
| 17               | 1                | 0              | -2.065545               | -1.809244 | 2.163939  |
| 18               | 6                | 0              | -2.744720               | -1.971034 | -0.550422 |
| 19               | 1                | 0              | -3.824627               | -1.816804 | -0.473899 |
| 20               | 1                | 0              | -2.479910               | -1.985089 | -1.611211 |
| 21               | 1                | 0              | -2.528154               | -2.958963 | -0.133706 |
| 22               | 6                | 0              | 3.855948                | -0.930356 | -0.318164 |
| 23               | 1                | 0              | 4.182052                | -0.376332 | -1.204135 |
| 24               | 1                | 0              | 4.325460                | -0.455603 | 0.548578  |
| 25               | 1                | 0              | 4.243872                | -1.947663 | -0.397695 |
| 26               | 8                | 0              | -2.110670               | 2.616277  | -1.727816 |
| 27               | 1                | 0              | -1.576846               | 2.199628  | -1.028034 |
| 28               | 1                | 0              | -2.966109               | 2.786312  | -1.319505 |
| 29               | 8                | 0              | 1.243174                | 3.627812  | 0.783854  |
| 30               | 1                | 0              | 1.256376                | 3.961987  | 1.688898  |
| 31               | 1                | 0              | 1.104193                | 4.403014  | 0.226374  |

Rotational constants (GHZ): 0.6496469 0.5774292 0.3600687

### Thymolate

Electronic Energy -617.343125

Stoichiometry C10H17O3(1-)

Framework group C1[X(C10H17O3)]

Deg. of freedom 84

Full point group C1 NOp 1

Largest Abelian subgroup C1 NOp 1

Largest concise Abelian subgroup C1 NOp 1

Standard orientation:

| Center<br>Number            | Atomic<br>Number | Atomic<br>Type | Coordinates (Angstroms) |           |           |
|-----------------------------|------------------|----------------|-------------------------|-----------|-----------|
|                             |                  |                | X                       | Y         | Z         |
| 1                           | 6                | 0              | -1.564293               | 0.826235  | -0.020035 |
| 2                           | 6                | 0              | -0.196255               | 0.443050  | -0.062908 |
| 3                           | 6                | 0              | 0.091875                | -0.961435 | -0.078845 |
| 4                           | 6                | 0              | -0.972505               | -1.862564 | -0.033524 |
| 5                           | 6                | 0              | -2.309664               | -1.456435 | 0.018348  |
| 6                           | 6                | 0              | -2.614727               | -0.090400 | 0.026347  |
| 7                           | 1                | 0              | -1.784886               | 1.890567  | -0.019968 |
| 8                           | 1                | 0              | -0.760233               | -2.927731 | -0.044801 |
| 9                           | 1                | 0              | -3.103397               | -2.196446 | 0.046155  |
| 10                          | 8                | 0              | 0.748838                | 1.356811  | -0.092854 |
| 11                          | 6                | 0              | 1.538415                | -1.434825 | -0.107169 |
| 12                          | 1                | 0              | 2.124324                | -0.621430 | -0.542000 |
| 13                          | 6                | 0              | 1.771100                | -2.679866 | -0.979071 |
| 14                          | 1                | 0              | 1.400597                | -2.528447 | -1.997122 |
| 15                          | 1                | 0              | 2.840666                | -2.904754 | -1.039318 |
| 16                          | 1                | 0              | 1.276575                | -3.566495 | -0.570603 |
| 17                          | 6                | 0              | 2.076582                | -1.669787 | 1.319332  |
| 18                          | 1                | 0              | 3.140905                | -1.928572 | 1.301539  |
| 19                          | 1                | 0              | 1.956057                | -0.777336 | 1.938918  |
| 20                          | 1                | 0              | 1.538185                | -2.491297 | 1.804174  |
| 21                          | 6                | 0              | -4.048450               | 0.385393  | 0.113532  |
| 22                          | 1                | 0              | -4.350757               | 0.545094  | 1.155031  |
| 23                          | 1                | 0              | -4.188810               | 1.333600  | -0.412112 |
| 24                          | 1                | 0              | -4.737922               | -0.346767 | -0.314791 |
| 25                          | 8                | 0              | 0.331809                | 3.977584  | -0.009183 |
| 26                          | 1                | 0              | -0.180855               | 4.224666  | -0.785117 |
| 27                          | 1                | 0              | 0.423660                | 2.981828  | -0.059184 |
| 28                          | 8                | 0              | 3.405239                | 1.688898  | -0.086186 |
| 29                          | 1                | 0              | 2.433472                | 1.481708  | -0.083433 |
| 30                          | 1                | 0              | 3.452871                | 2.649275  | -0.047628 |
| Rotational constants (GHZ): |                  |                | 0.7163425               | 0.5788882 | 0.3417463 |

## - 2H<sub>2</sub>O/ B3PW91 6-311G+dp/SMD

### H<sub>2</sub>O

Electronic Energy -229.332264

Stoichiometry H6O3

Framework group C1[X(H6O3)]

Deg. of freedom 21

Full point group C1 NOp 1

Largest Abelian subgroup C1 NOp 1

Largest concise Abelian subgroup C1 NOp 1

Standard orientation:

| Center<br>Number            | Atomic<br>Number | Atomic<br>Type | Coordinates (Angstroms) |           |           |
|-----------------------------|------------------|----------------|-------------------------|-----------|-----------|
|                             |                  |                | X                       | Y         | Z         |
| 1                           | 8                | 0              | -2.494935               | -0.448565 | -0.004972 |
| 2                           | 1                | 0              | -2.295456               | -1.386131 | 0.083572  |
| 3                           | 1                | 0              | -1.621942               | -0.012346 | -0.014804 |
| 4                           | 8                | 0              | 0.001211                | 0.893130  | -0.008879 |
| 5                           | 1                | 0              | 0.011465                | 1.416860  | 0.801604  |
| 6                           | 1                | 0              | 0.016473                | 1.545600  | -0.720069 |
| 7                           | 8                | 0              | 2.394287                | -0.627847 | -0.027832 |
| 8                           | 1                | 0              | 1.585637                | -0.081611 | -0.024298 |
| 9                           | 1                | 0              | 3.099321                | -0.016113 | 0.207454  |
| Rotational constants (GHZ): |                  |                | 16.9597454              | 2.3759513 | 2.1053937 |

### OH

Electronic Energy -228.850093

Stoichiometry H5O3(1-)

Framework group C1[X(H5O3)]

Deg. of freedom 18



Full point group C1 NOp 1  
 Largest Abelian subgroup C1 NOp 1  
 Largest concise Abelian subgroup C1 NOp 1  
 Standard orientation:

| Center<br>Number            | Atomic<br>Number | Atomic<br>Type | Coordinates (Angstroms) |           |           |
|-----------------------------|------------------|----------------|-------------------------|-----------|-----------|
|                             |                  |                | X                       | Y         | Z         |
| 1                           | 8                | 0              | -2.185914               | -0.510229 | 0.071110  |
| 2                           | 1                | 0              | -1.328366               | 0.047024  | 0.017619  |
| 3                           | 1                | 0              | -2.774519               | -0.127146 | -0.586148 |
| 4                           | 8                | 0              | -0.001640               | 0.840823  | -0.059223 |
| 5                           | 1                | 0              | 0.002555                | 1.494137  | 0.647085  |
| 6                           | 8                | 0              | 2.252213                | -0.391012 | -0.094332 |
| 7                           | 1                | 0              | 1.351543                | 0.095095  | -0.046993 |
| 8                           | 1                | 0              | 2.231512                | -1.025763 | 0.627995  |
| Rotational constants (GHZ): |                  |                | 22.3431386              | 2.8811704 | 2.5882475 |

### Phenol

Electronic Energy -460.335848  
 Stoichiometry C6H10O3  
 Framework group C1[X(C6H10O3)]  
 Deg. of freedom 51  
 Full point group C1 NOp 1  
 Largest Abelian subgroup C1 NOp 1  
 Largest concise Abelian subgroup C1 NOp 1  
 Standard orientation:

| Center<br>Number            | Atomic<br>Number | Atomic<br>Type | Coordinates (Angstroms) |           |           |
|-----------------------------|------------------|----------------|-------------------------|-----------|-----------|
|                             |                  |                | X                       | Y         | Z         |
| 1                           | 6                | 0              | -0.691700               | -1.163850 | 0.255906  |
| 2                           | 6                | 0              | -0.144793               | 0.004326  | -0.278666 |
| 3                           | 6                | 0              | -0.966429               | 1.099723  | -0.551430 |
| 4                           | 6                | 0              | -2.330127               | 1.022059  | -0.289458 |
| 5                           | 6                | 0              | -2.886421               | -0.140506 | 0.242313  |
| 6                           | 6                | 0              | -2.059143               | -1.228507 | 0.511270  |
| 7                           | 1                | 0              | -0.050165               | -2.012625 | 0.468345  |
| 8                           | 1                | 0              | -2.961659               | 1.878177  | -0.505432 |
| 9                           | 1                | 0              | -3.950721               | -0.197291 | 0.443930  |
| 10                          | 8                | 0              | 1.188214                | 0.128245  | -0.551042 |
| 11                          | 1                | 0              | 1.683029                | -0.706778 | -0.359852 |
| 12                          | 8                | 0              | 2.590492                | 2.310714  | 0.643253  |
| 13                          | 1                | 0              | 1.929181                | 2.965753  | 0.888966  |
| 14                          | 1                | 0              | 2.077980                | 1.589268  | 0.236445  |
| 15                          | 8                | 0              | 2.735904                | -2.054161 | -0.139990 |
| 16                          | 1                | 0              | 3.190812                | -1.999801 | 0.708859  |
| 17                          | 1                | 0              | 3.441983                | -2.014740 | -0.796144 |
| 18                          | 1                | 0              | -2.477189               | -2.140572 | 0.925779  |
| 19                          | 1                | 0              | -0.528448               | 2.000757  | -0.968269 |
| Rotational constants (GHZ): |                  |                | 1.8201443               | 0.8808976 | 0.6331429 |

### Phenolate

Electronic Energy -459.867467  
 Stoichiometry C6H9O3(1-)  
 Framework group C1[X(C6H9O3)]  
 Deg. of freedom 48  
 Full point group C1 NOp 1  
 Largest Abelian subgroup C1 NOp 1  
 Largest concise Abelian subgroup C1 NOp 1  
 Standard orientation:

| Center<br>Number | Atomic<br>Number | Atomic<br>Type | Coordinates (Angstroms) |           |           |
|------------------|------------------|----------------|-------------------------|-----------|-----------|
|                  |                  |                | X                       | Y         | Z         |
| 1                | 6                | 0              | 0.768244                | 1.205074  | -0.032149 |
| 2                | 6                | 0              | 0.024168                | -0.000678 | -0.072008 |
| 3                | 6                | 0              | 0.767819                | -1.207033 | -0.045169 |
| 4                | 6                | 0              | 2.156803                | -1.200806 | 0.018530  |

|    |   |   |           |           |           |
|----|---|---|-----------|-----------|-----------|
| 5  | 6 | 0 | 2.870907  | -0.001818 | 0.057028  |
| 6  | 6 | 0 | 2.157205  | 1.197763  | 0.031409  |
| 7  | 1 | 0 | 0.228913  | 2.148366  | -0.052865 |
| 8  | 1 | 0 | 2.690209  | -2.147800 | 0.036743  |
| 9  | 1 | 0 | 3.954804  | -0.002262 | 0.105659  |
| 10 | 8 | 0 | -1.291461 | 0.000045  | -0.134688 |
| 11 | 8 | 0 | -2.708571 | 2.226574  | 0.090207  |
| 12 | 1 | 0 | -2.121480 | 2.967596  | -0.089040 |
| 13 | 1 | 0 | -2.128153 | 1.418126  | -0.001308 |
| 14 | 8 | 0 | -2.719498 | -2.224197 | 0.043470  |
| 15 | 1 | 0 | -2.133321 | -1.417526 | -0.022318 |
| 16 | 1 | 0 | -2.124872 | -2.935267 | 0.301713  |
| 17 | 1 | 0 | 0.228385  | -2.149958 | -0.076382 |
| 18 | 1 | 0 | 2.690882  | 2.144347  | 0.060039  |

Rotational constants (GHZ): 1.8802259 0.9420649 0.6287416

### Thymol

Electronic Energy -617.577213

Stoichiometry C10H18O3

Framework group C1[X(C10H18O3)]

Deg. of freedom 87

Full point group C1 NOp 1

Largest Abelian subgroup C1 NOp 1

Largest concise Abelian subgroup C1 NOp 1

Standard orientation:

| Center<br>Number | Atomic<br>Number | Atomic<br>Type | Coordinates (Angstroms) |           |           |
|------------------|------------------|----------------|-------------------------|-----------|-----------|
|                  |                  |                | X                       | Y         | Z         |
| 1                | 6                | 0              | 1.699738                | 0.126285  | 0.054921  |
| 2                | 6                | 0              | 0.326228                | 0.308443  | 0.230810  |
| 3                | 6                | 0              | -0.565397               | -0.771418 | 0.134581  |
| 4                | 6                | 0              | -0.013186               | -2.023511 | -0.146249 |
| 5                | 6                | 0              | 1.353828                | -2.212393 | -0.324746 |
| 6                | 6                | 0              | 2.233647                | -1.131407 | -0.226565 |
| 7                | 1                | 0              | 2.358901                | 0.985617  | 0.143108  |
| 8                | 1                | 0              | -0.676274               | -2.880799 | -0.221879 |
| 9                | 1                | 0              | 1.739450                | -3.205138 | -0.537519 |
| 10               | 8                | 0              | -0.181226               | 1.551710  | 0.507831  |
| 11               | 1                | 0              | 0.538376                | 2.225240  | 0.581177  |
| 12               | 6                | 0              | -2.059896               | -0.603931 | 0.340223  |
| 13               | 1                | 0              | -2.248650               | 0.452569  | 0.545148  |
| 14               | 6                | 0              | -2.552367               | -1.403633 | 1.551905  |
| 15               | 1                | 0              | -2.018574               | -1.115346 | 2.462660  |
| 16               | 1                | 0              | -3.620696               | -1.229207 | 1.716934  |
| 17               | 1                | 0              | -2.408881               | -2.478861 | 1.402552  |
| 18               | 6                | 0              | -2.849590               | -0.979937 | -0.918706 |
| 19               | 1                | 0              | -3.918582               | -0.796512 | -0.768662 |
| 20               | 1                | 0              | -2.524250               | -0.395275 | -1.784978 |
| 21               | 1                | 0              | -2.724934               | -2.040102 | -1.163203 |
| 22               | 6                | 0              | 3.711177                | -1.303911 | -0.445348 |
| 23               | 1                | 0              | 3.981372                | -1.077359 | -1.483293 |
| 24               | 1                | 0              | 4.291662                | -0.633528 | 0.194010  |
| 25               | 1                | 0              | 4.024146                | -2.331142 | -0.243084 |
| 26               | 8                | 0              | -1.977946               | 2.702440  | -1.390660 |
| 27               | 1                | 0              | -1.388764               | 2.281129  | -0.738641 |
| 28               | 1                | 0              | -2.585131               | 1.999454  | -1.645041 |
| 29               | 8                | 0              | 1.584332                | 3.593490  | 0.781525  |
| 30               | 1                | 0              | 1.577799                | 4.140220  | -0.013151 |
| 31               | 1                | 0              | 2.496648                | 3.290390  | 0.859320  |

Rotational constants (GHZ): 0.6738635 0.5826735 0.3638672

### Thymolate

Electronic Energy- -617.105470

Stoichiometry C10H17O3(1-)

Framework group C1[X(C10H17O3)]

Deg. of freedom 84

Full point group C1 NOp 1

Largest Abelian subgroup C1 NOp 1

Largest concise Abelian subgroup C1 NOP 1

Standard orientation:

| Center<br>Number            | Atomic<br>Number | Atomic<br>Type | Coordinates (Angstroms) |           |           |
|-----------------------------|------------------|----------------|-------------------------|-----------|-----------|
|                             |                  |                | X                       | Y         | Z         |
| 1                           | 6                | 0              | -1.570625               | 0.786966  | -0.064020 |
| 2                           | 6                | 0              | -0.203986               | 0.426879  | -0.129765 |
| 3                           | 6                | 0              | 0.117318                | -0.965593 | -0.099225 |
| 4                           | 6                | 0              | -0.922979               | -1.885912 | 0.007957  |
| 5                           | 6                | 0              | -2.264759               | -1.503946 | 0.081250  |
| 6                           | 6                | 0              | -2.600104               | -0.148668 | 0.040894  |
| 7                           | 1                | 0              | -1.814590               | 1.847053  | -0.094524 |
| 8                           | 1                | 0              | -0.686231               | -2.946273 | 0.036788  |
| 9                           | 1                | 0              | -3.042856               | -2.257416 | 0.165461  |
| 10                          | 8                | 0              | 0.725847                | 1.357810  | -0.219647 |
| 11                          | 6                | 0              | 1.570478                | -1.398419 | -0.136220 |
| 12                          | 1                | 0              | 2.108766                | -0.644239 | -0.720212 |
| 13                          | 6                | 0              | 1.801150                | -2.750286 | -0.812970 |
| 14                          | 1                | 0              | 1.373486                | -2.775670 | -1.820340 |
| 15                          | 1                | 0              | 2.874539                | -2.948306 | -0.899458 |
| 16                          | 1                | 0              | 1.364989                | -3.575607 | -0.240724 |
| 17                          | 6                | 0              | 2.173891                | -1.400164 | 1.276280  |
| 18                          | 1                | 0              | 3.246828                | -1.620089 | 1.245965  |
| 19                          | 1                | 0              | 2.042054                | -0.433648 | 1.770835  |
| 20                          | 1                | 0              | 1.691449                | -2.163631 | 1.897279  |
| 21                          | 6                | 0              | -4.037497               | 0.298886  | 0.084814  |
| 22                          | 1                | 0              | -4.174013               | 1.145007  | 0.765216  |
| 23                          | 1                | 0              | -4.381511               | 0.624112  | -0.903927 |
| 24                          | 1                | 0              | -4.695179               | -0.510667 | 0.411784  |
| 25                          | 8                | 0              | 0.193006                | 3.934603  | 0.011093  |
| 26                          | 1                | 0              | -0.762281               | 4.049255  | 0.024214  |
| 27                          | 1                | 0              | 0.327871                | 2.945737  | -0.073554 |
| 28                          | 8                | 0              | 3.374678                | 1.743593  | -0.139970 |
| 29                          | 1                | 0              | 2.410616                | 1.512475  | -0.157454 |
| 30                          | 1                | 0              | 3.390496                | 2.705403  | -0.113134 |
| Rotational constants (GHZ): |                  |                | 0.7330949               | 0.5838275 | 0.3445364 |

## - 2H<sub>2</sub>O/ B3PW91 6-311G+dp/PCM

### H<sub>2</sub>O

Electronic Energy -229.318876

Stoichiometry H6O3

Framework group C1[X(H6O3)]

Deg. of freedom 21

Full point group C1 NOp 1

Largest Abelian subgroup C1 NOp 1

Largest concise Abelian subgroup C1 NOp 1

Standard orientation:

| Center<br>Number            | Atomic<br>Number | Atomic<br>Type | Coordinates (Angstroms) |           |           |
|-----------------------------|------------------|----------------|-------------------------|-----------|-----------|
|                             |                  |                | X                       | Y         | Z         |
| 1                           | 8                | 0              | -2.494935               | -0.448565 | -0.004972 |
| 2                           | 1                | 0              | -2.295456               | -1.386131 | 0.083572  |
| 3                           | 1                | 0              | -1.621942               | -0.012346 | -0.014804 |
| 4                           | 8                | 0              | 0.001211                | 0.893130  | -0.008879 |
| 5                           | 1                | 0              | 0.011465                | 1.416860  | 0.801604  |
| 6                           | 1                | 0              | 0.016473                | 1.545600  | -0.720069 |
| 7                           | 8                | 0              | 2.394287                | -0.627847 | -0.027832 |
| 8                           | 1                | 0              | 1.585637                | -0.081611 | -0.024298 |
| 9                           | 1                | 0              | 3.099321                | -0.016113 | 0.207454  |
| Rotational constants (GHZ): |                  |                | 16.9597454              | 2.3759513 | 2.1053937 |

### OH

Electronic Energy -228.834438

Stoichiometry H5O3(1-)

Framework group C1[X(H5O3)]

Deg. of freedom 18

Full point group C1 NOp 1  
 Largest Abelian subgroup C1 NOp 1  
 Largest concise Abelian subgroup C1 NOp 1  
 Standard orientation:

| Center<br>Number | Atomic<br>Number | Atomic<br>Type | Coordinates (Angstroms) |           |           |
|------------------|------------------|----------------|-------------------------|-----------|-----------|
|                  |                  |                | X                       | Y         | Z         |
| 1                | 8                | 0              | -2.185914               | -0.510229 | 0.071110  |
| 2                | 1                | 0              | -1.328366               | 0.047024  | 0.017619  |
| 3                | 1                | 0              | -2.774519               | -0.127146 | -0.586148 |
| 4                | 8                | 0              | -0.001640               | 0.840823  | -0.059223 |
| 5                | 1                | 0              | 0.002555                | 1.494137  | 0.647085  |
| 6                | 8                | 0              | 2.252213                | -0.391012 | -0.094332 |
| 7                | 1                | 0              | 1.351543                | 0.095095  | -0.046993 |
| 8                | 1                | 0              | 2.231512                | -1.025763 | 0.627995  |

Rotational constants (GHZ): 22.3431386 2.8811704 2.5882475

### Phenol

Electronic Energy -460.326711  
 Stoichiometry C6H10O3  
 Framework group C1[X(C6H10O3)]  
 Deg. of freedom 51  
 Full point group C1 NOp 1  
 Largest Abelian subgroup C1 NOp 1  
 Largest concise Abelian subgroup C1 NOp 1  
 Standard orientation:

| Center<br>Number | Atomic<br>Number | Atomic<br>Type | Coordinates (Angstroms) |           |           |
|------------------|------------------|----------------|-------------------------|-----------|-----------|
|                  |                  |                | X                       | Y         | Z         |
| 1                | 6                | 0              | -0.691700               | -1.163850 | 0.255906  |
| 2                | 6                | 0              | -0.144793               | 0.004326  | -0.278666 |
| 3                | 6                | 0              | -0.966429               | 1.099723  | -0.551430 |
| 4                | 6                | 0              | -2.330127               | 1.022059  | -0.289458 |
| 5                | 6                | 0              | -2.886421               | -0.140506 | 0.242313  |
| 6                | 6                | 0              | -2.059143               | -1.228507 | 0.511270  |
| 7                | 1                | 0              | -0.050165               | -2.012625 | 0.468345  |
| 8                | 1                | 0              | -2.961659               | 1.878177  | -0.505432 |
| 9                | 1                | 0              | -3.950721               | -0.197291 | 0.443930  |
| 10               | 8                | 0              | 1.188214                | 0.128245  | -0.551042 |
| 11               | 1                | 0              | 1.683029                | -0.706778 | -0.359852 |
| 12               | 8                | 0              | 2.590492                | 2.310714  | 0.643253  |
| 13               | 1                | 0              | 1.929181                | 2.965753  | 0.888966  |
| 14               | 1                | 0              | 2.077980                | 1.589268  | 0.236445  |
| 15               | 8                | 0              | 2.735904                | -2.054161 | -0.139990 |
| 16               | 1                | 0              | 3.190812                | -1.999801 | 0.708859  |
| 17               | 1                | 0              | 3.441983                | -2.014740 | -0.796144 |
| 18               | 1                | 0              | -2.477189               | -2.140572 | 0.925779  |
| 19               | 1                | 0              | -0.528448               | 2.000757  | -0.968269 |

Rotational constants (GHZ): 1.8201443 0.8808976 0.6331429

### Phenolate

Electronic Energy -459.858007  
 Stoichiometry C6H9O3(1-)  
 Framework group C1[X(C6H9O3)]  
 Deg. of freedom 48  
 Full point group C1 NOp 1  
 Largest Abelian subgroup C1 NOp 1  
 Largest concise Abelian subgroup C1 NOp 1  
 Standard orientation:

| Center<br>Number | Atomic<br>Number | Atomic<br>Type | Coordinates (Angstroms) |           |           |
|------------------|------------------|----------------|-------------------------|-----------|-----------|
|                  |                  |                | X                       | Y         | Z         |
| 1                | 6                | 0              | -0.807930               | -1.204678 | -0.047769 |
| 2                | 6                | 0              | -0.056705               | -0.000004 | -0.000036 |
| 3                | 6                | 0              | -0.807930               | 1.204668  | 0.047732  |
| 4                | 6                | 0              | -2.197922               | 1.197712  | 0.047175  |

|    |   |   |           |           |           |
|----|---|---|-----------|-----------|-----------|
| 5  | 6 | 0 | -2.914369 | -0.000006 | 0.000030  |
| 6  | 6 | 0 | -2.197923 | -1.197723 | -0.047148 |
| 7  | 1 | 0 | -0.268408 | -2.147227 | -0.085361 |
| 8  | 1 | 0 | -2.731774 | 2.144292  | 0.084953  |
| 9  | 1 | 0 | -3.999345 | -0.000007 | 0.000056  |
| 10 | 8 | 0 | 1.251023  | -0.000002 | -0.000069 |
| 11 | 8 | 0 | 2.768464  | -2.156645 | 0.155698  |
| 12 | 1 | 0 | 2.644215  | -2.652039 | -0.657539 |
| 13 | 1 | 0 | 2.152402  | -1.373001 | 0.078373  |
| 14 | 8 | 0 | 2.768422  | 2.156694  | -0.155625 |
| 15 | 1 | 0 | 2.152394  | 1.372999  | -0.078536 |
| 16 | 1 | 0 | 2.644099  | 2.651887  | 0.657724  |
| 17 | 1 | 0 | -0.268407 | 2.147218  | 0.085296  |
| 18 | 1 | 0 | -2.731775 | -2.144305 | -0.084901 |

Rotational constants (GHZ): 1.9711824 0.9020585 0.6214956

#### Thymol

Electronic Energy -617.569276

Stoichiometry C10H18O3

Framework group C1[X(C10H18O3)]

Deg. of freedom 87

Full point group C1 NOp 1

Largest Abelian subgroup C1 NOp 1

Largest concise Abelian subgroup C1 NOp 1

Standard orientation:

| Center<br>Number | Atomic<br>Number | Atomic<br>Type | Coordinates (Angstroms) |           |           |
|------------------|------------------|----------------|-------------------------|-----------|-----------|
|                  |                  |                | X                       | Y         | Z         |
| 1                | 6                | 0              | 1.651783                | 0.289156  | 0.006594  |
| 2                | 6                | 0              | 0.262124                | 0.296732  | 0.113453  |
| 3                | 6                | 0              | -0.483004               | -0.892687 | 0.024502  |
| 4                | 6                | 0              | 0.236179                | -2.070243 | -0.176014 |
| 5                | 6                | 0              | 1.626258                | -2.085946 | -0.280916 |
| 6                | 6                | 0              | 2.355781                | -0.901363 | -0.189582 |
| 7                | 1                | 0              | 2.187269                | 1.231785  | 0.080322  |
| 8                | 1                | 0              | -0.300973               | -3.010087 | -0.251090 |
| 9                | 1                | 0              | 2.143060                | -3.028547 | -0.434823 |
| 10               | 8                | 0              | -0.417634               | 1.468592  | 0.303644  |
| 11               | 1                | 0              | 0.204932                | 2.211830  | 0.470709  |
| 12               | 6                | 0              | -1.990411               | -0.871254 | 0.199215  |
| 13               | 1                | 0              | -2.348736               | 0.079693  | -0.207678 |
| 14               | 6                | 0              | -2.358732               | -0.895822 | 1.690833  |
| 15               | 1                | 0              | -1.884179               | -0.072494 | 2.230877  |
| 16               | 1                | 0              | -3.442198               | -0.809909 | 1.823348  |
| 17               | 1                | 0              | -2.035154               | -1.835567 | 2.150888  |
| 18               | 6                | 0              | -2.713074               | -1.989043 | -0.554315 |
| 19               | 1                | 0              | -3.795364               | -1.846722 | -0.481662 |
| 20               | 1                | 0              | -2.444329               | -1.999957 | -1.614665 |
| 21               | 1                | 0              | -2.488516               | -2.975729 | -0.137141 |
| 22               | 6                | 0              | 3.855325                | -0.888373 | -0.316918 |
| 23               | 1                | 0              | 4.167294                | -0.418822 | -1.256071 |
| 24               | 1                | 0              | 4.319660                | -0.321696 | 0.495572  |
| 25               | 1                | 0              | 4.261986                | -1.901854 | -0.300651 |
| 26               | 8                | 0              | -2.127729               | 2.585559  | -1.727480 |
| 27               | 1                | 0              | -1.589976               | 2.176783  | -1.028338 |
| 28               | 1                | 0              | -2.969759               | 2.777655  | -1.305756 |
| 29               | 8                | 0              | 1.190522                | 3.623320  | 0.781934  |
| 30               | 1                | 0              | 1.096640                | 4.031220  | 1.649237  |
| 31               | 1                | 0              | 1.103702                | 4.345692  | 0.151021  |

Rotational constants (GHZ): 0.6540042 0.5811268 0.3626310

#### Thymolate

Electronic Energy- -617.098204

Stoichiometry C10H17O3(1-)

Framework group C1[X(C10H17O3)]

Deg. of freedom 84

Full point group C1 NOp 1

Largest Abelian subgroup C1 NOp 1

Largest concise Abelian subgroup C1 NOP 1

Standard orientation:

| Center<br>Number            | Atomic<br>Number | Atomic<br>Type | Coordinates (Angstroms) |           |           |
|-----------------------------|------------------|----------------|-------------------------|-----------|-----------|
|                             |                  |                | X                       | Y         | Z         |
| 1                           | 6                | 0              | 1.626243                | 0.482127  | -0.118661 |
| 2                           | 6                | 0              | 0.219895                | 0.437627  | 0.058958  |
| 3                           | 6                | 0              | -0.393927               | -0.851560 | 0.100021  |
| 4                           | 6                | 0              | 0.409836                | -1.981922 | -0.037324 |
| 5                           | 6                | 0              | 1.792053                | -1.909315 | -0.211526 |
| 6                           | 6                | 0              | 2.416032                | -0.658005 | -0.248807 |
| 7                           | 1                | 0              | 2.093695                | 1.463998  | -0.156825 |
| 8                           | 1                | 0              | -0.058327               | -2.964182 | -0.009013 |
| 9                           | 1                | 0              | 2.378495                | -2.817801 | -0.318428 |
| 10                          | 8                | 0              | -0.476422               | 1.544683  | 0.181604  |
| 11                          | 6                | 0              | -1.891859               | -0.978238 | 0.304333  |
| 12                          | 1                | 0              | -2.281442               | 0.043342  | 0.343961  |
| 13                          | 6                | 0              | -2.231106               | -1.654871 | 1.639338  |
| 14                          | 1                | 0              | -1.781682               | -1.117951 | 2.480404  |
| 15                          | 1                | 0              | -3.314781               | -1.685763 | 1.798396  |
| 16                          | 1                | 0              | -1.861813               | -2.685994 | 1.666161  |
| 17                          | 6                | 0              | -2.582769               | -1.699932 | -0.859284 |
| 18                          | 1                | 0              | -3.668702               | -1.720615 | -0.715500 |
| 19                          | 1                | 0              | -2.377821               | -1.202631 | -1.812077 |
| 20                          | 1                | 0              | -2.241531               | -2.737427 | -0.944572 |
| 21                          | 6                | 0              | 3.911865                | -0.543684 | -0.398254 |
| 22                          | 1                | 0              | 4.194760                | 0.384062  | -0.903107 |
| 23                          | 1                | 0              | 4.408485                | -0.544893 | 0.579381  |
| 24                          | 1                | 0              | 4.321496                | -1.381549 | -0.969276 |
| 25                          | 8                | 0              | 0.520168                | 3.771504  | 1.183307  |
| 26                          | 1                | 0              | 1.034955                | 3.527339  | 1.956340  |
| 27                          | 1                | 0              | 0.191849                | 2.903911  | 0.805924  |
| 28                          | 8                | 0              | -2.219192               | 2.385835  | -1.625536 |
| 29                          | 1                | 0              | -1.569696               | 2.036219  | -0.954513 |
| 30                          | 1                | 0              | -1.721955               | 3.030404  | -2.135018 |
| Rotational constants (GHZ): |                  |                | 0.6592475               | 0.5874810 | 0.3753732 |

## - 2H<sub>2</sub>O/ B3PW91 6-311G+dp/CPCM

### H<sub>2</sub>O

Electronic -229.318978

Stoichiometry H6O3

Framework group C1[X(H6O3)]

Deg. of freedom 21

Full point group C1 NOp 1

Largest Abelian subgroup C1 NOp 1

Largest concise Abelian subgroup C1 NOp 1

Standard orientation:

| Center<br>Number            | Atomic<br>Number | Atomic<br>Type | Coordinates (Angstroms) |           |           |
|-----------------------------|------------------|----------------|-------------------------|-----------|-----------|
|                             |                  |                | X                       | Y         | Z         |
| 1                           | 8                | 0              | -2.296878               | -0.593422 | -0.000255 |
| 2                           | 1                | 0              | -1.952339               | -1.490517 | -0.000004 |
| 3                           | 1                | 0              | -1.508045               | -0.025837 | -0.000169 |
| 4                           | 8                | 0              | 0.002110                | 1.143281  | 0.000013  |
| 5                           | 1                | 0              | 0.007888                | 1.729571  | 0.765109  |
| 6                           | 1                | 0              | 0.008090                | 1.729559  | -0.765091 |
| 7                           | 8                | 0              | 2.168610                | -0.751604 | 0.000222  |
| 8                           | 1                | 0              | 1.466189                | -0.080055 | 0.000153  |
| 9                           | 1                | 0              | 2.987486                | -0.248760 | 0.000165  |
| Rotational constants (GHZ): |                  |                | 11.2277243              | 2.8376767 | 2.2893942 |

### OH<sup>-</sup>

Electronic Energy -228.834586

Stoichiometry H5O3(1-)

Framework group C1[X(H5O3)]

Deg. of freedom 18

Full point group C1 NOp 1  
 Largest Abelian subgroup C1 NOp 1  
 Largest concise Abelian subgroup C1 NOp 1  
 Standard orientation:

| Center<br>Number | Atomic<br>Number | Atomic<br>Type | Coordinates (Angstroms) |           |           |
|------------------|------------------|----------------|-------------------------|-----------|-----------|
|                  |                  |                | X                       | Y         | Z         |
| 1                | 8                | 0              | 2.347649                | -0.359291 | -0.108003 |
| 2                | 1                | 0              | 1.408846                | 0.059358  | -0.053254 |
| 3                | 1                | 0              | 2.607740                | -0.514981 | 0.802915  |
| 4                | 8                | 0              | -0.000168               | 0.634046  | -0.006311 |
| 5                | 1                | 0              | 0.000681                | 1.593152  | 0.049920  |
| 6                | 8                | 0              | -2.344661               | -0.365915 | 0.108226  |
| 7                | 1                | 0              | -1.407508               | 0.056137  | 0.051504  |
| 8                | 1                | 0              | -2.632319               | -0.464388 | -0.802386 |

Rotational constants (GHZ): 33.0898352 2.5837218 2.4334453

### Phenol

Electronic Energy -460.326830  
 Stoichiometry C6H10O3  
 Framework group C1[X(C6H10O3)]  
 Deg. of freedom 51  
 Full point group C1 NOp 1  
 Largest Abelian subgroup C1 NOp 1  
 Largest concise Abelian subgroup C1 NOp 1  
 Standard orientation:

| Center<br>Number | Atomic<br>Number | Atomic<br>Type | Coordinates (Angstroms) |           |           |
|------------------|------------------|----------------|-------------------------|-----------|-----------|
|                  |                  |                | X                       | Y         | Z         |
| 1                | 6                | 0              | 0.824771                | 1.146992  | 0.130214  |
| 2                | 6                | 0              | 0.153042                | -0.042805 | -0.160487 |
| 3                | 6                | 0              | 0.870558                | -1.232867 | -0.296290 |
| 4                | 6                | 0              | 2.252542                | -1.228022 | -0.140898 |
| 5                | 6                | 0              | 2.931663                | -0.045569 | 0.148807  |
| 6                | 6                | 0              | 2.208778                | 1.137454  | 0.281858  |
| 7                | 1                | 0              | 0.262969                | 2.069445  | 0.234612  |
| 8                | 1                | 0              | 2.801718                | -2.158038 | -0.248786 |
| 9                | 1                | 0              | 4.009559                | -0.046722 | 0.268492  |
| 10               | 8                | 0              | -1.197977               | -0.089922 | -0.321782 |
| 11               | 1                | 0              | -1.606474               | 0.800932  | -0.222457 |
| 12               | 8                | 0              | -2.959282               | -2.202736 | 0.456433  |
| 13               | 1                | 0              | -3.094520               | -2.745662 | -0.324885 |
| 14               | 1                | 0              | -2.340245               | -1.509932 | 0.170588  |
| 15               | 8                | 0              | -2.418584               | 2.321105  | -0.066497 |
| 16               | 1                | 0              | -3.046305               | 2.396850  | 0.659884  |
| 17               | 1                | 0              | -2.889520               | 2.638225  | -0.844360 |
| 18               | 1                | 0              | 2.722632                | 2.066691  | 0.507089  |
| 19               | 1                | 0              | 0.338808                | -2.150463 | -0.524636 |

Rotational constants (GHZ): 1.7860070 0.8802264 0.6038646

### Phenolate

Electronic Energy -459.858194  
 Stoichiometry C6H9O3(1-)  
 Framework group C1[X(C6H9O3)]  
 Deg. of freedom 48  
 Full point group C1 NOp 1  
 Largest Abelian subgroup C1 NOp 1  
 Largest concise Abelian subgroup C1 NOp 1  
 Standard orientation:

| Center<br>Number | Atomic<br>Number | Atomic<br>Type | Coordinates (Angstroms) |           |           |
|------------------|------------------|----------------|-------------------------|-----------|-----------|
|                  |                  |                | X                       | Y         | Z         |
| 1                | 6                | 0              | -0.807930               | -1.204678 | -0.047769 |
| 2                | 6                | 0              | -0.056705               | -0.000004 | -0.000036 |
| 3                | 6                | 0              | -0.807930               | 1.204668  | 0.047732  |
| 4                | 6                | 0              | -2.197922               | 1.197712  | 0.047175  |

|    |   |   |           |           |           |
|----|---|---|-----------|-----------|-----------|
| 5  | 6 | 0 | -2.914369 | -0.000006 | 0.000030  |
| 6  | 6 | 0 | -2.197923 | -1.197723 | -0.047148 |
| 7  | 1 | 0 | -0.268408 | -2.147227 | -0.085361 |
| 8  | 1 | 0 | -2.731774 | 2.144292  | 0.084953  |
| 9  | 1 | 0 | -3.999345 | -0.000007 | 0.000056  |
| 10 | 8 | 0 | 1.251023  | -0.000002 | -0.000069 |
| 11 | 8 | 0 | 2.768464  | -2.156645 | 0.155698  |
| 12 | 1 | 0 | 2.644215  | -2.652039 | -0.657539 |
| 13 | 1 | 0 | 2.152402  | -1.373001 | 0.078373  |
| 14 | 8 | 0 | 2.768422  | 2.156694  | -0.155625 |
| 15 | 1 | 0 | 2.152394  | 1.372999  | -0.078536 |
| 16 | 1 | 0 | 2.644099  | 2.651887  | 0.657724  |
| 17 | 1 | 0 | -0.268407 | 2.147218  | 0.085296  |
| 18 | 1 | 0 | -2.731775 | -2.144305 | -0.084901 |

Rotational constants (GHZ): 1.9711824 0.9020585 0.6214956

#### Thymol

Electronic Energy -617.569391

Stoichiometry C10H18O3

Framework group C1[X(C10H18O3)]

Deg. of freedom 87

Full point group C1 NOp 1

Largest Abelian subgroup C1 NOp 1

Largest concise Abelian subgroup C1 NOp 1

Standard orientation:

| Center<br>Number | Atomic<br>Number | Atomic<br>Type | Coordinates (Angstroms) |           |           |
|------------------|------------------|----------------|-------------------------|-----------|-----------|
|                  |                  |                | X                       | Y         | Z         |
| 1                | 6                | 0              | 1.651783                | 0.289156  | 0.006594  |
| 2                | 6                | 0              | 0.262124                | 0.296732  | 0.113453  |
| 3                | 6                | 0              | -0.483004               | -0.892687 | 0.024502  |
| 4                | 6                | 0              | 0.236179                | -2.070243 | -0.176014 |
| 5                | 6                | 0              | 1.626258                | -2.085946 | -0.280916 |
| 6                | 6                | 0              | 2.355781                | -0.901363 | -0.189582 |
| 7                | 1                | 0              | 2.187269                | 1.231785  | 0.080322  |
| 8                | 1                | 0              | -0.300973               | -3.010087 | -0.251090 |
| 9                | 1                | 0              | 2.143060                | -3.028547 | -0.434823 |
| 10               | 8                | 0              | -0.417634               | 1.468592  | 0.303644  |
| 11               | 1                | 0              | 0.204932                | 2.211830  | 0.470709  |
| 12               | 6                | 0              | -1.990411               | -0.871254 | 0.199215  |
| 13               | 1                | 0              | -2.348736               | 0.079693  | -0.207678 |
| 14               | 6                | 0              | -2.358732               | -0.895822 | 1.690833  |
| 15               | 1                | 0              | -1.884179               | -0.072494 | 2.230877  |
| 16               | 1                | 0              | -3.442198               | -0.809909 | 1.823348  |
| 17               | 1                | 0              | -2.035154               | -1.835567 | 2.150888  |
| 18               | 6                | 0              | -2.713074               | -1.989043 | -0.554315 |
| 19               | 1                | 0              | -3.795364               | -1.846722 | -0.481662 |
| 20               | 1                | 0              | -2.444329               | -1.999957 | -1.614665 |
| 21               | 1                | 0              | -2.488516               | -2.975729 | -0.137141 |
| 22               | 6                | 0              | 3.855325                | -0.888373 | -0.316918 |
| 23               | 1                | 0              | 4.167294                | -0.418822 | -1.256071 |
| 24               | 1                | 0              | 4.319660                | -0.321696 | 0.495572  |
| 25               | 1                | 0              | 4.261986                | -1.901854 | -0.300651 |
| 26               | 8                | 0              | -2.127729               | 2.585559  | -1.727480 |
| 27               | 1                | 0              | -1.589976               | 2.176783  | -1.028338 |
| 28               | 1                | 0              | -2.969759               | 2.777655  | -1.305756 |
| 29               | 8                | 0              | 1.190522                | 3.623320  | 0.781934  |
| 30               | 1                | 0              | 1.096640                | 4.031220  | 1.649237  |
| 31               | 1                | 0              | 1.103702                | 4.345692  | 0.151021  |

Rotational constants (GHZ): 0.6540042 0.5811268 0.3626310

#### Thymolate

Electronic Energy -617.098415

Stoichiometry C10H17O3(1-)

Framework group C1[X(C10H17O3)]

Deg. of freedom 84

Full point group C1 NOp 1

Largest Abelian subgroup C1 NOp 1

Largest concise Abelian subgroup C1 NOP 1



Standard orientation:

| Center<br>Number            | Atomic<br>Number | Atomic<br>Type | Coordinates (Angstroms) |           |           |
|-----------------------------|------------------|----------------|-------------------------|-----------|-----------|
|                             |                  |                | X                       | Y         | Z         |
| 1                           | 6                | 0              | 1.626243                | 0.482127  | -0.118661 |
| 2                           | 6                | 0              | 0.219895                | 0.437627  | 0.058958  |
| 3                           | 6                | 0              | -0.393927               | -0.851560 | 0.100021  |
| 4                           | 6                | 0              | 0.409836                | -1.981922 | -0.037324 |
| 5                           | 6                | 0              | 1.792053                | -1.909315 | -0.211526 |
| 6                           | 6                | 0              | 2.416032                | -0.658005 | -0.248807 |
| 7                           | 1                | 0              | 2.093695                | 1.463998  | -0.156825 |
| 8                           | 1                | 0              | -0.058327               | -2.964182 | -0.009013 |
| 9                           | 1                | 0              | 2.378495                | -2.817801 | -0.318428 |
| 10                          | 8                | 0              | -0.476422               | 1.544683  | 0.181604  |
| 11                          | 6                | 0              | -1.891859               | -0.978238 | 0.304333  |
| 12                          | 1                | 0              | -2.281442               | 0.043342  | 0.343961  |
| 13                          | 6                | 0              | -2.231106               | -1.654871 | 1.639338  |
| 14                          | 1                | 0              | -1.781682               | -1.117951 | 2.480404  |
| 15                          | 1                | 0              | -3.314781               | -1.685763 | 1.798396  |
| 16                          | 1                | 0              | -1.861813               | -2.685994 | 1.666161  |
| 17                          | 6                | 0              | -2.582769               | -1.699932 | -0.859284 |
| 18                          | 1                | 0              | -3.668702               | -1.720615 | -0.715500 |
| 19                          | 1                | 0              | -2.377821               | -1.202631 | -1.812077 |
| 20                          | 1                | 0              | -2.241531               | -2.737427 | -0.944572 |
| 21                          | 6                | 0              | 3.911865                | -0.543684 | -0.398254 |
| 22                          | 1                | 0              | 4.194760                | 0.384062  | -0.903107 |
| 23                          | 1                | 0              | 4.408485                | -0.544893 | 0.579381  |
| 24                          | 1                | 0              | 4.321496                | -1.381549 | -0.969276 |
| 25                          | 8                | 0              | 0.520168                | 3.771504  | 1.183307  |
| 26                          | 1                | 0              | 1.034955                | 3.527339  | 1.956340  |
| 27                          | 1                | 0              | 0.191849                | 2.903911  | 0.805924  |
| 28                          | 8                | 0              | -2.219192               | 2.385835  | -1.625536 |
| 29                          | 1                | 0              | -1.569696               | 2.036219  | -0.954513 |
| 30                          | 1                | 0              | -1.721955               | 3.030404  | -2.135018 |
| Rotational constants (GHZ): |                  |                | 0.6592475               | 0.5874810 | 0.3753732 |

## - 2H<sub>2</sub>O/ W97XD 6-311G+dp/SMD

### H<sub>2</sub>O

Electronic Energy -229.348806

Stoichiometry H6O3

Framework group C1[X(H6O3)]

Deg. of freedom 21

Full point group C1 NOp 1

Largest Abelian subgroup C1 NOp 1

Largest concise Abelian subgroup C1 NOp 1

Standard orientation:

| Center<br>Number            | Atomic<br>Number | Atomic<br>Type | Coordinates (Angstroms) |           |           |
|-----------------------------|------------------|----------------|-------------------------|-----------|-----------|
|                             |                  |                | X                       | Y         | Z         |
| 1                           | 8                | 0              | -1.965536               | -0.700126 | -0.055753 |
| 2                           | 1                | 0              | -1.582981               | -1.443920 | 0.416645  |
| 3                           | 1                | 0              | -1.294017               | 0.002533  | -0.010773 |
| 4                           | 8                | 0              | 0.002934                | 1.302634  | 0.008698  |
| 5                           | 1                | 0              | 0.015580                | 1.826341  | 0.815938  |
| 6                           | 1                | 0              | 0.021081                | 1.937068  | -0.714988 |
| 7                           | 8                | 0              | 1.827005                | -0.829366 | -0.013775 |
| 8                           | 1                | 0              | 1.220503                | -0.069017 | -0.018204 |
| 9                           | 1                | 0              | 2.704609                | -0.438140 | -0.001983 |
| Rotational constants (GHZ): |                  |                | 8.9042224               | 3.8973181 | 2.7522536 |

### OH

Electronic Energy -228.864447

Stoichiometry H5O3(1-)

Framework group C1[X(H5O3)]

Deg. of freedom 18

Full point group C1 NOp 1  
 Largest Abelian subgroup C1 NOp 1  
 Largest concise Abelian subgroup C1 NOp 1  
 Standard orientation:

| Center<br>Number            | Atomic<br>Number | Atomic<br>Type | Coordinates (Angstroms) |           |           |
|-----------------------------|------------------|----------------|-------------------------|-----------|-----------|
|                             |                  |                | X                       | Y         | Z         |
| 1                           | 8                | 0              | -2.203038               | -0.502190 | 0.073485  |
| 2                           | 1                | 0              | -1.344472               | 0.045347  | 0.022335  |
| 3                           | 1                | 0              | -2.783304               | -0.139629 | -0.603202 |
| 4                           | 8                | 0              | -0.001605               | 0.821737  | -0.051405 |
| 5                           | 1                | 0              | 0.002120                | 1.546942  | 0.580644  |
| 6                           | 8                | 0              | 2.265709                | -0.386666 | -0.096212 |
| 7                           | 1                | 0              | 1.366447                | 0.092099  | -0.045469 |
| 8                           | 1                | 0              | 2.270689                | -1.007805 | 0.638745  |
| Rotational constants (GHZ): |                  |                | 22.9681042              | 2.8416324 | 2.5629840 |

### Phenol

Electronic Energy -460.361903  
 Stoichiometry C6H10O3  
 Framework group C1[X(C6H10O3)]  
 Deg. of freedom 51  
 Full point group C1 NOp 1  
 Largest Abelian subgroup C1 NOp 1  
 Largest concise Abelian subgroup C1 NOp 1  
 Standard orientation:

| Center<br>Number            | Atomic<br>Number | Atomic<br>Type | Coordinates (Angstroms) |           |           |
|-----------------------------|------------------|----------------|-------------------------|-----------|-----------|
|                             |                  |                | X                       | Y         | Z         |
| 1                           | 6                | 0              | -0.749993               | -1.195204 | 0.134636  |
| 2                           | 6                | 0              | -0.132570               | 0.004299  | -0.205507 |
| 3                           | 6                | 0              | -0.886805               | 1.163843  | -0.354539 |
| 4                           | 6                | 0              | -2.260290               | 1.118706  | -0.163153 |
| 5                           | 6                | 0              | -2.889035               | -0.074629 | 0.175678  |
| 6                           | 6                | 0              | -2.126196               | -1.226579 | 0.322260  |
| 7                           | 1                | 0              | -0.155413               | -2.093637 | 0.248689  |
| 8                           | 1                | 0              | -2.842709               | 2.025132  | -0.280410 |
| 9                           | 1                | 0              | -3.961370               | -0.105608 | 0.324109  |
| 10                          | 8                | 0              | 1.217640                | 0.093760  | -0.406637 |
| 11                          | 1                | 0              | 1.676579                | -0.768340 | -0.259601 |
| 12                          | 8                | 0              | 2.613743                | 2.345298  | 0.516097  |
| 13                          | 1                | 0              | 2.370700                | 3.073820  | -0.065512 |
| 14                          | 1                | 0              | 2.113269                | 1.578617  | 0.180170  |
| 15                          | 8                | 0              | 2.625076                | -2.180506 | -0.061852 |
| 16                          | 1                | 0              | 3.093538                | -2.194250 | 0.782076  |
| 17                          | 1                | 0              | 3.314773                | -2.252411 | -0.733563 |
| 18                          | 1                | 0              | -2.602805               | -2.163584 | 0.585959  |
| 19                          | 1                | 0              | -0.388894               | 2.089220  | -0.619045 |
| Rotational constants (GHZ): |                  |                | 1.7779602               | 0.9132646 | 0.6231768 |

### Phenolate

Electronic Energy -459.891878  
 Stoichiometry C6H9O3(1-)  
 Framework group C1[X(C6H9O3)]  
 Deg. of freedom 48  
 Full point group C1 NOp 1  
 Largest Abelian subgroup C1 NOp 1  
 Largest concise Abelian subgroup C1 NOp 1  
 Standard orientation:

| Center<br>Number | Atomic<br>Number | Atomic<br>Type | Coordinates (Angstroms) |           |           |
|------------------|------------------|----------------|-------------------------|-----------|-----------|
|                  |                  |                | X                       | Y         | Z         |
| 1                | 6                | 0              | 0.782663                | 1.179975  | -0.022191 |
| 2                | 6                | 0              | 0.036633                | -0.016717 | -0.082545 |
| 3                | 6                | 0              | 0.764346                | -1.225667 | -0.063561 |
| 4                | 6                | 0              | 2.149395                | -1.230641 | 0.011167  |

|    |   |   |           |           |           |
|----|---|---|-----------|-----------|-----------|
| 5  | 6 | 0 | 2.869554  | -0.040525 | 0.069350  |
| 6  | 6 | 0 | 2.167686  | 1.161626  | 0.052125  |
| 7  | 1 | 0 | 0.249849  | 2.125043  | -0.036394 |
| 8  | 1 | 0 | 2.675056  | -2.179869 | 0.022440  |
| 9  | 1 | 0 | 3.951229  | -0.049723 | 0.126246  |
| 10 | 8 | 0 | -1.281488 | -0.004925 | -0.157929 |
| 11 | 8 | 0 | -2.622618 | 2.251650  | 0.070168  |
| 12 | 1 | 0 | -1.995339 | 2.974778  | -0.033559 |
| 13 | 1 | 0 | -2.076061 | 1.419111  | -0.020777 |
| 14 | 8 | 0 | -2.746556 | -2.187903 | -0.001705 |
| 15 | 1 | 0 | -2.155607 | -1.382544 | -0.037944 |
| 16 | 1 | 0 | -2.989746 | -2.286874 | 0.924445  |
| 17 | 1 | 0 | 0.216700  | -2.160695 | -0.110728 |
| 18 | 1 | 0 | 2.707549  | 2.101894  | 0.095925  |

Rotational constants (GHZ): 1.9069249 0.9428061 0.6333924

#### Thymol

Electronic Energy -617.618699

Stoichiometry C10H18O3

Framework group C1[X(C10H18O3)]

Deg. of freedom 87

Full point group C1 NOp 1

Largest Abelian subgroup C1 NOp 1

Largest concise Abelian subgroup C1 NOp 1

Standard orientation:

| Center<br>Number | Atomic<br>Number | Atomic<br>Type | Coordinates (Angstroms) |           |           |
|------------------|------------------|----------------|-------------------------|-----------|-----------|
|                  |                  |                | X                       | Y         | Z         |
| 1                | 6                | 0              | 1.665616                | 0.158736  | 0.041080  |
| 2                | 6                | 0              | 0.286711                | 0.287203  | 0.141467  |
| 3                | 6                | 0              | -0.561579               | -0.824316 | 0.037304  |
| 4                | 6                | 0              | 0.045990                | -2.057729 | -0.168821 |
| 5                | 6                | 0              | 1.427511                | -2.196515 | -0.266965 |
| 6                | 6                | 0              | 2.257221                | -1.086523 | -0.163075 |
| 7                | 1                | 0              | 2.284401                | 1.046277  | 0.123516  |
| 8                | 1                | 0              | -0.571132               | -2.943659 | -0.255285 |
| 9                | 1                | 0              | 1.859189                | -3.178211 | -0.426824 |
| 10               | 8                | 0              | -0.288008               | 1.517452  | 0.340649  |
| 11               | 1                | 0              | 0.393749                | 2.216888  | 0.480167  |
| 12               | 6                | 0              | -2.062478               | -0.661285 | 0.194945  |
| 13               | 1                | 0              | -2.335413               | 0.292605  | -0.263522 |
| 14               | 6                | 0              | -2.441587               | -0.584925 | 1.679171  |
| 15               | 1                | 0              | -1.902188               | 0.213933  | 2.191793  |
| 16               | 1                | 0              | -3.512718               | -0.397873 | 1.793455  |
| 17               | 1                | 0              | -2.208033               | -1.528128 | 2.181515  |
| 18               | 6                | 0              | -2.874140               | -1.750001 | -0.503582 |
| 19               | 1                | 0              | -3.938535               | -1.510655 | -0.444357 |
| 20               | 1                | 0              | -2.607134               | -1.839412 | -1.559304 |
| 21               | 1                | 0              | -2.733530               | -2.726755 | -0.033932 |
| 22               | 6                | 0              | 3.752085                | -1.206768 | -0.278810 |
| 23               | 1                | 0              | 4.119106                | -0.693948 | -1.171959 |
| 24               | 1                | 0              | 4.252611                | -0.755411 | 0.581169  |
| 25               | 1                | 0              | 4.058192                | -2.251777 | -0.341649 |
| 26               | 8                | 0              | -1.791200               | 2.581486  | -1.794162 |
| 27               | 1                | 0              | -1.296881               | 2.184247  | -1.052955 |
| 28               | 1                | 0              | -2.583813               | 2.039854  | -1.876270 |
| 29               | 8                | 0              | 1.438209                | 3.551248  | 0.792814  |
| 30               | 1                | 0              | 0.952282                | 4.335449  | 1.076898  |
| 31               | 1                | 0              | 1.925751                | 3.827822  | 0.006854  |

Rotational constants (GHZ): 0.6675340 0.5885093 0.3711919

#### Thymolate

Electronic Energy -617.144926

Stoichiometry C10H17O3(1-)

Framework group C1[X(C10H17O3)]

Deg. of freedom 84

Full point group C1 NOp 1

Largest Abelian subgroup C1 NOp 1

Largest concise Abelian subgroup C1 NOp 1

Standard orientation:

| Center<br>Number            | Atomic<br>Number | Atomic<br>Type | Coordinates (Angstroms) |           |           |
|-----------------------------|------------------|----------------|-------------------------|-----------|-----------|
|                             |                  |                | X                       | Y         | Z         |
| 1                           | 6                | 0              | -1.548924               | 0.842635  | 0.091914  |
| 2                           | 6                | 0              | -0.204408               | 0.432598  | 0.011707  |
| 3                           | 6                | 0              | 0.064382                | -0.961051 | -0.100770 |
| 4                           | 6                | 0              | -1.009386               | -1.841062 | -0.118963 |
| 5                           | 6                | 0              | -2.333854               | -1.412879 | -0.033629 |
| 6                           | 6                | 0              | -2.613364               | -0.053820 | 0.070513  |
| 7                           | 1                | 0              | -1.747323               | 1.907254  | 0.176329  |
| 8                           | 1                | 0              | -0.817588               | -2.905041 | -0.203166 |
| 9                           | 1                | 0              | -3.141767               | -2.136211 | -0.050916 |
| 10                          | 8                | 0              | 0.766711                | 1.328000  | 0.040331  |
| 11                          | 6                | 0              | 1.503475                | -1.436978 | -0.160200 |
| 12                          | 1                | 0              | 2.058575                | -0.696962 | -0.742837 |
| 13                          | 6                | 0              | 1.687176                | -2.788216 | -0.848776 |
| 14                          | 1                | 0              | 1.247027                | -2.796014 | -1.849089 |
| 15                          | 1                | 0              | 2.752331                | -3.012212 | -0.948738 |
| 16                          | 1                | 0              | 1.236496                | -3.602689 | -0.275622 |
| 17                          | 6                | 0              | 2.123902                | -1.474111 | 1.242512  |
| 18                          | 1                | 0              | 3.188082                | -1.722271 | 1.193083  |
| 19                          | 1                | 0              | 2.024917                | -0.513367 | 1.750972  |
| 20                          | 1                | 0              | 1.629543                | -2.233611 | 1.856050  |
| 21                          | 6                | 0              | -4.032239               | 0.447312  | 0.140478  |
| 22                          | 1                | 0              | -4.160531               | 1.168525  | 0.951151  |
| 23                          | 1                | 0              | -4.318142               | 0.951851  | -0.787090 |
| 24                          | 1                | 0              | -4.733315               | -0.373517 | 0.301096  |
| 25                          | 8                | 0              | 0.391646                | 3.915384  | -0.182111 |
| 26                          | 1                | 0              | 0.070527                | 4.089603  | -1.072742 |
| 27                          | 1                | 0              | 0.469981                | 2.918819  | -0.115766 |
| 28                          | 8                | 0              | 3.405548                | 1.570374  | -0.087435 |
| 29                          | 1                | 0              | 2.430055                | 1.388827  | -0.045704 |
| 30                          | 1                | 0              | 3.479335                | 2.530381  | -0.072009 |
| Rotational constants (GHZ): |                  |                | 0.7419549               | 0.5837649 | 0.3467626 |

## - 2H<sub>2</sub>O/ W97XD 6-311G+dp/PCM

### H<sub>2</sub>O

Electronic Energy -229.335123

Stoichiometry H6O3

Framework group C1[X(H6O3)]

Deg. of freedom 21

Full point group C1 NOp 1

Largest Abelian subgroup C1 NOp 1

Largest concise Abelian subgroup C1 NOp 1

Standard orientation:

| Center<br>Number            | Atomic<br>Number | Atomic<br>Type | Coordinates (Angstroms) |           |           |
|-----------------------------|------------------|----------------|-------------------------|-----------|-----------|
|                             |                  |                | X                       | Y         | Z         |
| 1                           | 8                | 0              | -2.089611               | -0.678902 | 0.000039  |
| 2                           | 1                | 0              | -1.625799               | -1.517928 | -0.000040 |
| 3                           | 1                | 0              | -1.389917               | -0.008410 | -0.000006 |
| 4                           | 8                | 0              | -0.002943               | 1.272775  | -0.000022 |
| 5                           | 1                | 0              | 0.007357                | 1.853483  | 0.765859  |
| 6                           | 1                | 0              | 0.007302                | 1.853586  | -0.765825 |
| 7                           | 8                | 0              | 1.948936                | -0.807808 | -0.000112 |
| 8                           | 1                | 0              | 1.330103                | -0.061968 | -0.000065 |
| 9                           | 1                | 0              | 2.819892                | -0.407289 | 0.000840  |
| Rotational constants (GHZ): |                  |                | 9.3158328               | 3.4572268 | 2.5515749 |

### OH<sup>-</sup>

Electronic Energy -228.848407

Stoichiometry H5O3(1-)

Framework group C1[X(H5O3)]

Deg. of freedom 18

Full point group C1 NOp 1  
 Largest Abelian subgroup C1 NOp 1  
 Largest concise Abelian subgroup C1 NOp 1  
 Standard orientation:

| Center<br>Number | Atomic<br>Number | Atomic<br>Type | Coordinates (Angstroms) |           |           |
|------------------|------------------|----------------|-------------------------|-----------|-----------|
|                  |                  |                | X                       | Y         | Z         |
| 1                | 8                | 0              | 2.340848                | -0.383085 | -0.107284 |
| 2                | 1                | 0              | 1.426195                | 0.057161  | -0.057513 |
| 3                | 1                | 0              | 2.598618                | -0.534647 | 0.802565  |
| 4                | 8                | 0              | -0.000377               | 0.681282  | -0.005006 |
| 5                | 1                | 0              | 0.000424                | 1.638630  | 0.037913  |
| 6                | 8                | 0              | -2.338284               | -0.387959 | 0.107623  |
| 7                | 1                | 0              | -1.425067               | 0.055430  | 0.056126  |
| 8                | 1                | 0              | -2.617669               | -0.498480 | -0.801756 |

Rotational constants (GHZ): 29.7077647 2.5972631 2.4249258

### Phenol

Electronic Energy -460.352300

Stoichiometry C6H10O3

Framework group C1[X(C6H10O3)]

Deg. of freedom 51

Full point group C1 NOp 1

Largest Abelian subgroup C1 NOp 1

Largest concise Abelian subgroup C1 NOp 1

Standard orientation:

| Center<br>Number | Atomic<br>Number | Atomic<br>Type | Coordinates (Angstroms) |           |           |
|------------------|------------------|----------------|-------------------------|-----------|-----------|
|                  |                  |                | X                       | Y         | Z         |
| 1                | 6                | 0              | -0.743471               | -1.172240 | 0.125483  |
| 2                | 6                | 0              | -0.107250               | 0.025220  | -0.199710 |
| 3                | 6                | 0              | -0.848918               | 1.197166  | -0.338159 |
| 4                | 6                | 0              | -2.225130               | 1.166941  | -0.151189 |
| 5                | 6                | 0              | -2.871020               | -0.023324 | 0.173058  |
| 6                | 6                | 0              | -2.122182               | -1.187829 | 0.308893  |
| 7                | 1                | 0              | -0.158958               | -2.079418 | 0.232006  |
| 8                | 1                | 0              | -2.795990               | 2.082408  | -0.260879 |
| 9                | 1                | 0              | -3.944760               | -0.042309 | 0.317553  |
| 10               | 8                | 0              | 1.237468                | 0.099332  | -0.392875 |
| 11               | 1                | 0              | 1.666337                | -0.772732 | -0.264913 |
| 12               | 8                | 0              | 2.666016                | 2.365333  | 0.506968  |
| 13               | 1                | 0              | 2.714464                | 2.960612  | -0.242939 |
| 14               | 1                | 0              | 2.186798                | 1.588730  | 0.177920  |
| 15               | 8                | 0              | 2.449636                | -2.303453 | -0.032910 |
| 16               | 1                | 0              | 3.065524                | -2.372225 | 0.700908  |
| 17               | 1                | 0              | 2.901165                | -2.688465 | -0.788154 |
| 18               | 1                | 0              | -2.611588               | -2.122157 | 0.561099  |
| 19               | 1                | 0              | -0.340127               | 2.120256  | -0.592311 |

Rotational constants (GHZ): 1.7034982 0.9391133 0.6241319

### Phenolate

Electronic Energy -459.881628

Stoichiometry C6H9O3(1-)

Framework group C1[X(C6H9O3)]

Deg. of freedom 48

Full point group C1 NOp 1

Largest Abelian subgroup C1 NOp 1

Largest concise Abelian subgroup C1 NOP 1

Standard orientation:

| Center<br>Number | Atomic<br>Number | Atomic<br>Type | Coordinates (Angstroms) |           |           |
|------------------|------------------|----------------|-------------------------|-----------|-----------|
|                  |                  |                | X                       | Y         | Z         |
| 1                | 6                | 0              | 0.775999                | 1.204878  | -0.014645 |
| 2                | 6                | 0              | 0.027996                | -0.000017 | -0.000066 |
| 3                | 6                | 0              | 0.775988                | -1.204918 | 0.014576  |
| 4                | 6                | 0              | 2.164501                | -1.197593 | 0.014330  |

|    |   |   |           |           |           |
|----|---|---|-----------|-----------|-----------|
| 5  | 6 | 0 | 2.879423  | -0.000028 | 0.000053  |
| 6  | 6 | 0 | 2.164512  | 1.197542  | -0.014284 |
| 7  | 1 | 0 | 0.235312  | 2.146815  | -0.025348 |
| 8  | 1 | 0 | 2.698504  | -2.143621 | 0.025854  |
| 9  | 1 | 0 | 3.963487  | -0.000033 | 0.000098  |
| 10 | 8 | 0 | -1.277689 | -0.000011 | -0.000122 |
| 11 | 8 | 0 | -2.696518 | 2.231214  | 0.114499  |
| 12 | 1 | 0 | -2.463228 | 2.743758  | -0.660651 |
| 13 | 1 | 0 | -2.133805 | 1.413049  | 0.062477  |
| 14 | 8 | 0 | -2.696713 | -2.231119 | -0.114365 |
| 15 | 1 | 0 | -2.133824 | -1.413052 | -0.062680 |
| 16 | 1 | 0 | -2.463407 | -2.743481 | 0.660902  |
| 17 | 1 | 0 | 0.235292  | -2.146850 | 0.025232  |
| 18 | 1 | 0 | 2.698524  | 2.143565  | -0.025764 |

Rotational constants (GHZ): 1.8887015 0.9386221 0.6289976

### Thymol

Electronic Energy -617.609391

Stoichiometry C10H18O3

Framework group C1[X(C10H18O3)]

Deg. of freedom 87

Full point group C1 NOp 1

Largest Abelian subgroup C1 NOp 1

Largest concise Abelian subgroup C1 NOp 1

Standard orientation:

| Center<br>Number | Atomic<br>Number | Atomic<br>Type | Coordinates (Angstroms) |           |           |
|------------------|------------------|----------------|-------------------------|-----------|-----------|
|                  |                  |                | X                       | Y         | Z         |
| 1                | 6                | 0              | 1.660848                | 0.281385  | 0.014929  |
| 2                | 6                | 0              | 0.273168                | 0.304126  | 0.107032  |
| 3                | 6                | 0              | -0.484858               | -0.873889 | 0.015307  |
| 4                | 6                | 0              | 0.218550                | -2.060111 | -0.171310 |
| 5                | 6                | 0              | 1.608391                | -2.092589 | -0.261615 |
| 6                | 6                | 0              | 2.348751                | -0.918343 | -0.168990 |
| 7                | 1                | 0              | 2.207910                | 1.216597  | 0.090294  |
| 8                | 1                | 0              | -0.327804               | -2.993337 | -0.248525 |
| 9                | 1                | 0              | 2.114856                | -3.041448 | -0.405374 |
| 10               | 8                | 0              | -0.395218               | 1.481909  | 0.287310  |
| 11               | 1                | 0              | 0.232625                | 2.221219  | 0.422766  |
| 12               | 6                | 0              | -1.994320               | -0.824608 | 0.171945  |
| 13               | 1                | 0              | -2.345519               | 0.075817  | -0.340426 |
| 14               | 6                | 0              | -2.372016               | -0.689434 | 1.654413  |
| 15               | 1                | 0              | -1.897840               | 0.185493  | 2.104401  |
| 16               | 1                | 0              | -3.455542               | -0.589256 | 1.768532  |
| 17               | 1                | 0              | -2.052278               | -1.577537 | 2.209319  |
| 18               | 6                | 0              | -2.717906               | -2.014378 | -0.459354 |
| 19               | 1                | 0              | -3.798291               | -1.852779 | -0.418147 |
| 20               | 1                | 0              | -2.434097               | -2.149768 | -1.506514 |
| 21               | 1                | 0              | -2.508167               | -2.946355 | 0.074538  |
| 22               | 6                | 0              | 3.851286                | -0.921307 | -0.282181 |
| 23               | 1                | 0              | 4.171635                | -0.469713 | -1.225947 |
| 24               | 1                | 0              | 4.309221                | -0.345439 | 0.526185  |
| 25               | 1                | 0              | 4.247785                | -1.937721 | -0.245423 |
| 26               | 8                | 0              | -2.219273               | 2.435508  | -1.667425 |
| 27               | 1                | 0              | -1.617920               | 2.095604  | -0.986038 |
| 28               | 1                | 0              | -3.062536               | 2.536285  | -1.222346 |
| 29               | 8                | 0              | 1.286633                | 3.594579  | 0.653535  |
| 30               | 1                | 0              | 1.246593                | 4.041990  | 1.502408  |
| 31               | 1                | 0              | 1.240878                | 4.289272  | -0.008121 |

Rotational constants (GHZ): 0.6818712 0.5812152 0.3649818

### Thymolate

Electronic Energy- -617.136181

Stoichiometry C10H17O3(1-)

Framework group C1[X(C10H17O3)]

Deg. of freedom 84

Full point group C1 NOp 1

Largest Abelian subgroup C1 NOp 1

Largest concise Abelian subgroup C1 NOp 1

Standard orientation:

| Center<br>Number            | Atomic<br>Number | Atomic<br>Type | Coordinates (Angstroms) |           |           |
|-----------------------------|------------------|----------------|-------------------------|-----------|-----------|
|                             |                  |                | X                       | Y         | Z         |
| 1                           | 6                | 0              | -1.570857               | 0.794648  | 0.015013  |
| 2                           | 6                | 0              | -0.205957               | 0.430455  | -0.057900 |
| 3                           | 6                | 0              | 0.100739                | -0.964758 | -0.104461 |
| 4                           | 6                | 0              | -0.943112               | -1.880658 | -0.064789 |
| 5                           | 6                | 0              | -2.282603               | -1.493822 | 0.013713  |
| 6                           | 6                | 0              | -2.604162               | -0.138145 | 0.050807  |
| 7                           | 1                | 0              | -1.806486               | 1.856028  | 0.049787  |
| 8                           | 1                | 0              | -0.715832               | -2.942265 | -0.096963 |
| 9                           | 1                | 0              | -3.066247               | -2.244772 | 0.043277  |
| 10                          | 8                | 0              | 0.728518                | 1.343539  | -0.082613 |
| 11                          | 6                | 0              | 1.555681                | -1.390405 | -0.149818 |
| 12                          | 1                | 0              | 2.077545                | -0.663184 | -0.780379 |
| 13                          | 6                | 0              | 1.787526                | -2.775330 | -0.756119 |
| 14                          | 1                | 0              | 1.324221                | -2.865851 | -1.742838 |
| 15                          | 1                | 0              | 2.860096                | -2.960662 | -0.866183 |
| 16                          | 1                | 0              | 1.385239                | -3.570378 | -0.119831 |
| 17                          | 6                | 0              | 2.183859                | -1.310007 | 1.249301  |
| 18                          | 1                | 0              | 3.256541                | -1.527031 | 1.212424  |
| 19                          | 1                | 0              | 2.052174                | -0.313696 | 1.676934  |
| 20                          | 1                | 0              | 1.712046                | -2.038302 | 1.918249  |
| 21                          | 6                | 0              | -4.041871               | 0.319154  | 0.099367  |
| 22                          | 1                | 0              | -4.163859               | 1.180193  | 0.761867  |
| 23                          | 1                | 0              | -4.390553               | 0.621494  | -0.893724 |
| 24                          | 1                | 0              | -4.700482               | -0.478619 | 0.450996  |
| 25                          | 8                | 0              | 0.212645                | 3.933658  | -0.013898 |
| 26                          | 1                | 0              | -0.375909               | 4.120353  | -0.746528 |
| 27                          | 1                | 0              | 0.360561                | 2.949299  | -0.045324 |
| 28                          | 8                | 0              | 3.371978                | 1.642731  | -0.153836 |
| 29                          | 1                | 0              | 2.407755                | 1.426385  | -0.113974 |
| 30                          | 1                | 0              | 3.402603                | 2.544793  | -0.475694 |
| Rotational constants (GHZ): |                  |                | 0.7450336               | 0.5849983 | 0.3463810 |

## - 2H<sub>2</sub>O/ W97XD 6-311G+dp/CPCM

### H<sub>2</sub>O

Electronic Energy -229.335224

Stoichiometry H6O3

Framework group C1[X(H6O3)]

Deg. of freedom 21

Full point group C1 NOp 1

Largest Abelian subgroup C1 NOp 1

Largest concise Abelian subgroup C1 NOp 1

Standard orientation:

| Center<br>Number            | Atomic<br>Number | Atomic<br>Type | Coordinates (Angstroms) |           |           |
|-----------------------------|------------------|----------------|-------------------------|-----------|-----------|
|                             |                  |                | X                       | Y         | Z         |
| 1                           | 8                | 0              | -2.089611               | -0.678902 | 0.000039  |
| 2                           | 1                | 0              | -1.625799               | -1.517928 | -0.000040 |
| 3                           | 1                | 0              | -1.389917               | -0.008410 | -0.000006 |
| 4                           | 8                | 0              | -0.002943               | 1.272775  | -0.000022 |
| 5                           | 1                | 0              | 0.007357                | 1.853483  | 0.765859  |
| 6                           | 1                | 0              | 0.007302                | 1.853586  | -0.765825 |
| 7                           | 8                | 0              | 1.948936                | -0.807808 | -0.000112 |
| 8                           | 1                | 0              | 1.330103                | -0.061968 | -0.000065 |
| 9                           | 1                | 0              | 2.819892                | -0.407289 | 0.000840  |
| Rotational constants (GHZ): |                  |                | 9.3158328               | 3.4572268 | 2.5515749 |

### OH

Electronic Energy -228.848526

Stoichiometry H5O3(1-)

Framework group C1[X(H5O3)]

Deg. of freedom 18

Full point group C1 NOp 1  
 Largest Abelian subgroup C1 NOp 1  
 Largest concise Abelian subgroup C1 NOp 1  
 Standard orientation:

| Center<br>Number | Atomic<br>Number | Atomic<br>Type | Coordinates (Angstroms) |           |           |
|------------------|------------------|----------------|-------------------------|-----------|-----------|
|                  |                  |                | X                       | Y         | Z         |
| 1                | 8                | 0              | 2.340848                | -0.383085 | -0.107284 |
| 2                | 1                | 0              | 1.426195                | 0.057161  | -0.057513 |
| 3                | 1                | 0              | 2.598618                | -0.534647 | 0.802565  |
| 4                | 8                | 0              | -0.000377               | 0.681282  | -0.005006 |
| 5                | 1                | 0              | 0.000424                | 1.638630  | 0.037913  |
| 6                | 8                | 0              | -2.338284               | -0.387959 | 0.107623  |
| 7                | 1                | 0              | -1.425067               | 0.055430  | 0.056126  |
| 8                | 1                | 0              | -2.617669               | -0.498480 | -0.801756 |

Rotational constants (GHZ): 29.7077647 2.5972631 2.4249258

### Phenol

Electronic Energy -460.352403  
 Stoichiometry C6H10O3  
 Framework group C1[X(C6H10O3)]  
 Deg. of freedom 51  
 Full point group C1 NOp 1  
 Largest Abelian subgroup C1 NOp 1  
 Largest concise Abelian subgroup C1 NOp 1  
 Standard orientation:

| Center<br>Number | Atomic<br>Number | Atomic<br>Type | Coordinates (Angstroms) |           |           |
|------------------|------------------|----------------|-------------------------|-----------|-----------|
|                  |                  |                | X                       | Y         | Z         |
| 1                | 6                | 0              | -0.743471               | -1.172240 | 0.125483  |
| 2                | 6                | 0              | -0.107250               | 0.025220  | -0.199710 |
| 3                | 6                | 0              | -0.848918               | 1.197166  | -0.338159 |
| 4                | 6                | 0              | -2.225130               | 1.166941  | -0.151189 |
| 5                | 6                | 0              | -2.871020               | -0.023324 | 0.173058  |
| 6                | 6                | 0              | -2.122182               | -1.187829 | 0.308893  |
| 7                | 1                | 0              | -0.158958               | -2.079418 | 0.232006  |
| 8                | 1                | 0              | -2.795990               | 2.082408  | -0.260879 |
| 9                | 1                | 0              | -3.944760               | -0.042309 | 0.317553  |
| 10               | 8                | 0              | 1.237468                | 0.099332  | -0.392875 |
| 11               | 1                | 0              | 1.666337                | -0.772732 | -0.264913 |
| 12               | 8                | 0              | 2.666016                | 2.365333  | 0.506968  |
| 13               | 1                | 0              | 2.714464                | 2.960612  | -0.242939 |
| 14               | 1                | 0              | 2.186798                | 1.588730  | 0.177920  |
| 15               | 8                | 0              | 2.449636                | -2.303453 | -0.032910 |
| 16               | 1                | 0              | 3.065524                | -2.372225 | 0.700908  |
| 17               | 1                | 0              | 2.901165                | -2.688465 | -0.788154 |
| 18               | 1                | 0              | -2.611588               | -2.122157 | 0.561099  |
| 19               | 1                | 0              | -0.340127               | 2.120256  | -0.592311 |

Rotational constants (GHZ): 1.7034982 0.9391133 0.6241319

### Phenolate

Electronic Energy -459.881822  
 Stoichiometry C6H9O3(1-)  
 Framework group C1[X(C6H9O3)]  
 Deg. of freedom 48  
 Full point group C1 NOp 1  
 Largest Abelian subgroup C1 NOp 1  
 Largest concise Abelian subgroup C1 NOp 1  
 Standard orientation:

| Center<br>Number | Atomic<br>Number | Atomic<br>Type | Coordinates (Angstroms) |           |           |
|------------------|------------------|----------------|-------------------------|-----------|-----------|
|                  |                  |                | X                       | Y         | Z         |
| 1                | 6                | 0              | 0.775999                | 1.204878  | -0.014645 |
| 2                | 6                | 0              | 0.027996                | -0.000017 | -0.000066 |
| 3                | 6                | 0              | 0.775988                | -1.204918 | 0.014576  |
| 4                | 6                | 0              | 2.164501                | -1.197593 | 0.014330  |



|    |   |   |           |           |           |
|----|---|---|-----------|-----------|-----------|
| 5  | 6 | 0 | 2.879423  | -0.000028 | 0.000053  |
| 6  | 6 | 0 | 2.164512  | 1.197542  | -0.014284 |
| 7  | 1 | 0 | 0.235312  | 2.146815  | -0.025348 |
| 8  | 1 | 0 | 2.698504  | -2.143621 | 0.025854  |
| 9  | 1 | 0 | 3.963487  | -0.000033 | 0.000098  |
| 10 | 8 | 0 | -1.277689 | -0.000011 | -0.000122 |
| 11 | 8 | 0 | -2.696518 | 2.231214  | 0.114499  |
| 12 | 1 | 0 | -2.463228 | 2.743758  | -0.660651 |
| 13 | 1 | 0 | -2.133805 | 1.413049  | 0.062477  |
| 14 | 8 | 0 | -2.696713 | -2.231119 | -0.114365 |
| 15 | 1 | 0 | -2.133824 | -1.413052 | -0.062680 |
| 16 | 1 | 0 | -2.463407 | -2.743481 | 0.660902  |
| 17 | 1 | 0 | 0.235292  | -2.146850 | 0.025232  |
| 18 | 1 | 0 | 2.698524  | 2.143565  | -0.025764 |

Rotational constants (GHZ): 1.8887015 0.9386221 0.6289976

### Thymol

Electronic Energy -617.609504

Stoichiometry C10H18O3

Framework group C1[X(C10H18O3)]

Deg. of freedom 87

Full point group C1 NOp 1

Largest Abelian subgroup C1 NOp 1

Largest concise Abelian subgroup C1 NOp 1

Standard orientation:

| Center<br>Number | Atomic<br>Number | Atomic<br>Type | Coordinates (Angstroms) |           |           |
|------------------|------------------|----------------|-------------------------|-----------|-----------|
|                  |                  |                | X                       | Y         | Z         |
| 1                | 6                | 0              | 1.660848                | 0.281385  | 0.014929  |
| 2                | 6                | 0              | 0.273168                | 0.304126  | 0.107032  |
| 3                | 6                | 0              | -0.484858               | -0.873889 | 0.015307  |
| 4                | 6                | 0              | 0.218550                | -2.060111 | -0.171310 |
| 5                | 6                | 0              | 1.608391                | -2.092589 | -0.261615 |
| 6                | 6                | 0              | 2.348751                | -0.918343 | -0.168990 |
| 7                | 1                | 0              | 2.207910                | 1.216597  | 0.090294  |
| 8                | 1                | 0              | -0.327804               | -2.993337 | -0.248525 |
| 9                | 1                | 0              | 2.114856                | -3.041448 | -0.405374 |
| 10               | 8                | 0              | -0.395218               | 1.481909  | 0.287310  |
| 11               | 1                | 0              | 0.232625                | 2.221219  | 0.422766  |
| 12               | 6                | 0              | -1.994320               | -0.824608 | 0.171945  |
| 13               | 1                | 0              | -2.345519               | 0.075817  | -0.340426 |
| 14               | 6                | 0              | -2.372016               | -0.689434 | 1.654413  |
| 15               | 1                | 0              | -1.897840               | 0.185493  | 2.104401  |
| 16               | 1                | 0              | -3.455542               | -0.589256 | 1.768532  |
| 17               | 1                | 0              | -2.052278               | -1.577537 | 2.209319  |
| 18               | 6                | 0              | -2.717906               | -2.014378 | -0.459354 |
| 19               | 1                | 0              | -3.798291               | -1.852779 | -0.418147 |
| 20               | 1                | 0              | -2.434097               | -2.149768 | -1.506514 |
| 21               | 1                | 0              | -2.508167               | -2.946355 | 0.074538  |
| 22               | 6                | 0              | 3.851286                | -0.921307 | -0.282181 |
| 23               | 1                | 0              | 4.171635                | -0.469713 | -1.225947 |
| 24               | 1                | 0              | 4.309221                | -0.345439 | 0.526185  |
| 25               | 1                | 0              | 4.247785                | -1.937721 | -0.245423 |
| 26               | 8                | 0              | -2.219273               | 2.435508  | -1.667425 |
| 27               | 1                | 0              | -1.617920               | 2.095604  | -0.986038 |
| 28               | 1                | 0              | -3.062536               | 2.536285  | -1.222346 |
| 29               | 8                | 0              | 1.286633                | 3.594579  | 0.653535  |
| 30               | 1                | 0              | 1.246593                | 4.041990  | 1.502408  |
| 31               | 1                | 0              | 1.240878                | 4.289272  | -0.008121 |

Rotational constants (GHZ): 0.6818712 0.5812152 0.3649818

### Thymolate

Electronic Energy- -617.136385

Stoichiometry C10H17O3(1-)

Framework group C1[X(C10H17O3)]

Deg. of freedom 84

Full point group C1 NOp 1

Largest Abelian subgroup C1 NOp 1

Largest concise Abelian subgroup C1 NOp 1

Standard orientation:

| Center<br>Number            | Atomic<br>Number | Atomic<br>Type | Coordinates (Angstroms) |           |           |
|-----------------------------|------------------|----------------|-------------------------|-----------|-----------|
|                             |                  |                | X                       | Y         | Z         |
| 1                           | 6                | 0              | -1.572364               | 0.791675  | 0.010703  |
| 2                           | 6                | 0              | -0.206687               | 0.430340  | -0.061406 |
| 3                           | 6                | 0              | 0.103136                | -0.964324 | -0.104532 |
| 4                           | 6                | 0              | -0.938678               | -1.882432 | -0.062008 |
| 5                           | 6                | 0              | -2.279032               | -1.498383 | 0.015871  |
| 6                           | 6                | 0              | -2.603635               | -0.143351 | 0.049322  |
| 7                           | 1                | 0              | -1.810570               | 1.852577  | 0.042496  |
| 8                           | 1                | 0              | -0.709067               | -2.943611 | -0.091285 |
| 9                           | 1                | 0              | -3.060943               | -2.251034 | 0.047689  |
| 10                          | 8                | 0              | 0.725768                | 1.345624  | -0.088158 |
| 11                          | 6                | 0              | 1.558963                | -1.387060 | -0.148999 |
| 12                          | 1                | 0              | 2.079442                | -0.660166 | -0.781080 |
| 13                          | 6                | 0              | 1.793659                | -2.772843 | -0.752247 |
| 14                          | 1                | 0              | 1.330382                | -2.866548 | -1.738687 |
| 15                          | 1                | 0              | 2.866607                | -2.956085 | -0.862113 |
| 16                          | 1                | 0              | 1.393250                | -3.567378 | -0.114166 |
| 17                          | 6                | 0              | 2.186820                | -1.302451 | 1.250037  |
| 18                          | 1                | 0              | 3.259877                | -1.517726 | 1.213855  |
| 19                          | 1                | 0              | 2.053258                | -0.305531 | 1.675724  |
| 20                          | 1                | 0              | 1.716254                | -2.030207 | 1.920455  |
| 21                          | 6                | 0              | -4.042341               | 0.310893  | 0.096860  |
| 22                          | 1                | 0              | -4.165829               | 1.174747  | 0.755389  |
| 23                          | 1                | 0              | -4.392425               | 0.607798  | -0.897372 |
| 24                          | 1                | 0              | -4.698863               | -0.486761 | 0.452615  |
| 25                          | 8                | 0              | 0.202476                | 3.933944  | -0.004486 |
| 26                          | 1                | 0              | -0.400431               | 4.122304  | -0.724924 |
| 27                          | 1                | 0              | 0.352927                | 2.950246  | -0.043068 |
| 28                          | 8                | 0              | 3.369124                | 1.648761  | -0.153119 |
| 29                          | 1                | 0              | 2.404991                | 1.431498  | -0.115784 |
| 30                          | 1                | 0              | 3.403155                | 2.526862  | -0.535253 |
| Rotational constants (GHZ): |                  |                | 0.7452069               | 0.5850133 | 0.3464057 |

## References

1. Sabuzi, F.; Churakova, E.; Galloni, P.; Wever, R.; Hollmann, F.; Floris, B.; Conte, V. Thymol Bromination – A Comparison between Enzymatic and Chemical Catalysis. *Eur. J. Inorg. Chem.* **2015**, 3519-3525.
2. Piombino, C.; Lange, H.; Sabuzi, F.; Galloni, P.; Conte, V.; Crestini, C. Lignosulfonate Microcapsules for Delivery and Controlled Release of Thymol and Derivatives. *Molecules* **2020**, 25, 866.
3. Joshi, A.V.; Baidoosi, M.; Mukhopadhyay, S.; Sasson, Y. Nitration of Phenol and Substituted Phenols with Dilute Nitric Acid Using Phase-Transfer Catalysts. *Org. Proc. Res. Dev.* **2003**, 7, 95–97.
